# Supplementary material for: SaPt-CNN-LSTM-AR-EA: a hybrid ensemble learning framework for time series-based multivariate DNA sequence prediction
Source: PeerJ journal article supplement (doi:10.7717/peerj.16192), 2023-10-04

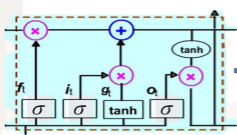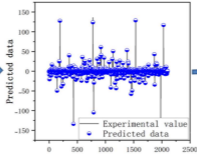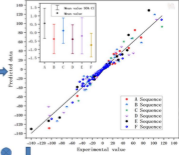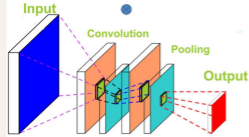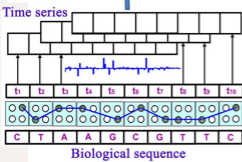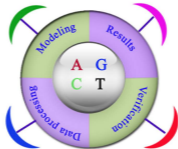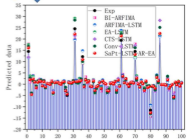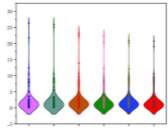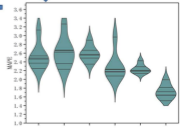

Supplement: GA.pdf [file GA.pdf]
