# Supplementary material for: SaPt-CNN-LSTM-AR-EA: a hybrid ensemble learning framework for time series-based multivariate DNA sequence prediction
Source: PeerJ journal article supplement (doi:10.7717/peerj.16192), 2023-10-04
Supplement: Source_data.zip [file Source_data.zip]

## Sheet: 原表
Data point	1	2	3	4	5	6	7	8	9	10	11	12	13	14	15	16	17	18	19	20	21	22	23	24	25	26	27	28	29	30	31	32	33	34	35	36	37	38	39	40	41	42	43	44	45	46	47	48	49
1	2	2	2	1	3	4	2	4	3	4	4	2	1	4	2	2	1	2	2	2	4	3	4	4	4	4	4	4	1	1	4	4	3	3	3	1	1	1	1	3	2	1	3	1	1	1	3	1	1
2	1	4	2	4	2	3	1	1	2	1	4	2	4	3	1	1	1	2	1	1	1	1	2	2	4	1	1	1	1	3	1	1	2	1	4	4	1	3	1	4	1	1	1	1	2	2	4	1	4
3	1	1	1	4	1	4	3	1	2	3	1	1	1	2	4	1	4	2	1	3	1	4	4	1	2	4	4	4	1	1	1	3	1	3	4	4	4	1	1	1	2	4	3	1	4	2	2	1	4
4	1	4	4	2	2	2	3	4	1	2	4	2	1	2	1	1	1	1	1	2	1	1	2	2	2	4	2	3	1	3	3	4	1	1	1	1	1	4	1	1	1	1	2	1	2	2	4	2	3
5	1	4	1	1	1	1	1	4	2	3	3	1	3	4	2	2	4	3	3	4	3	3	4	2	2	1	1	1	4	1	1	1	1	1	4	2	3	4	2	1	1	1	1	2	4	4	4	2	2
6	1	1	4	1	4	3	4	1	3	3	4	2	1	1	2	1	1	1	3	4	1	2	2	2	1	1	4	4	1	1	4	1	3	1	1	2	1	1	1	4	1	4	3	4	1	4	1	1	1
7	1	4	1	4	4	3	4	4	4	2	2	2	1	1	3	1	2	1	4	1	1	3	1	1	4	4	3	1	1	4	1	4	2	3	1	2	3	1	1	4	1	1	4	1	1	2	1	2	3
8	4	2	4	1	4	2	4	4	1	1	1	2	1	3	1	1	2	2	1	1	2	1	1	1	4	2	1	4	4	1	1	2	2	1	2	4	4	1	1	1	2	1	1	1	3	1	4	2	1
9	1	4	2	2	4	2	1	2	1	1	2	1	4	1	2	1	2	4	1	4	2	1	1	4	4	4	3	1	1	4	4	4	2	3	1	4	2	2	2	1	4	1	2	2	3	1	1	2	3
10	1	4	2	3	1	3	1	2	1	2	4	1	2	2	2	3	4	1	4	2	1	2	4	2	1	2	4	4	1	1	2	2	1	2	4	4	4	1	1	4	4	1	1	1	3	1	2	4	1
11	4	4	3	1	4	1	1	2	2	1	4	4	2	2	1	1	4	4	4	1	2	3	4	1	3	1	2	1	2	2	1	2	3	1	2	1	1	1	1	1	4	1	2	1	2	4	4	2	1
12	2	4	2	1	1	2	4	4	2	1	4	1	1	3	3	4	1	1	1	2	1	1	1	1	2	4	2	1	4	1	3	4	2	2	1	2	1	4	2	1	4	4	3	1	1	1	1	1	4
13	3	4	1	4	1	3	1	1	1	1	4	1	4	4	2	3	1	1	4	2	1	1	1	3	2	4	2	2	4	2	4	4	1	1	3	1	1	4	2	2	1	4	1	1	1	2	3	4	4
14	4	4	1	2	1	4	4	2	4	4	1	4	4	2	2	2	1	4	1	1	4	3	3	4	2	4	4	4	2	2	4	4	4	2	3	1	2	1	2	2	1	4	1	4	2	4	4	1	1
15	2	1	3	1	1	2	4	2	2	3	1	1	4	3	4	2	1	4	2	4	4	3	4	2	1	4	2	2	3	4	4	4	1	2	3	4	3	1	1	1	3	3	3	3	1	1	1	1	2
16	1	2	4	2	2	4	3	1	1	2	2	1	2	4	1	2	2	4	1	1	1	1	3	4	2	2	1	4	4	1	2	1	1	1	2	3	1	4	4	2	3	1	1	3	4	2	4	1	4
17	1	3	4	1	2	1	3	3	4	4	4	4	3	3	2	1	1	1	2	4	1	2	4	4	2	3	4	1	3	1	2	3	4	3	3	1	1	3	1	3	2	1	3	1	1	3	1	1	4
18	3	4	1	4	2	2	2	3	4	2	1	1	1	4	1	2	3	4	1	1	1	4	2	2	3	4	1	1	2	4	1	1	4	1	2	3	1	1	2	2	4	4	2	1	2	1	1	2	3
19	1	3	4	1	1	1	1	3	1	1	1	1	2	4	2	4	1	4	1	4	2	1	1	1	2	2	3	4	4	4	2	1	1	2	1	1	1	2	1	4	2	2	4	2	2	2	3	4	1
20	2	3	1	2	4	1	1	1	2	3	3	3	2	1	2	1	1	4	1	4	2	3	1	1	2	2	4	4	4	4	3	1	4	2	1	1	2	1	4	4	1	4	1	4	2	4	4	1	4
21	2	1	1	2	3	4	4	3	2	2	2	1	2	4	4	2	3	4	2	1	3	3	3	3	1	4	4	1	4	2	2	1	1	2	3	4	1	4	1	4	4	2	2	2	1	1	3	1	4
22	2	1	1	1	1	4	1	1	2	3	4	4	3	4	4	4	4	1	4	2	3	2	2	1	1	1	3	3	3	1	1	3	4	1	2	1	1	3	2	1	2	4	2	2	1	1	3	2	4
23	3	1	4	1	1	4	1	2	1	2	1	3	1	2	1	2	1	4	4	4	1	4	1	4	1	1	1	1	3	1	4	4	4	1	1	1	2	4	1	4	3	4	4	3	4	4	4	1	2
24	1	3	1	4	3	1	1	1	1	2	1	4	1	1	4	1	4	4	2	1	1	1	4	2	3	4	1	1	1	1	1	2	1	1	1	2	4	1	3	3	1	4	2	1	1	2	2	4	4
25	3	2	4	2	4	4	1	2	1	2	4	4	3	4	4	2	2	1	2	1	1	4	4	4	3	3	1	1	1	1	2	2	4	2	1	1	1	2	4	2	1	4	4	3	4	4	4	1	1
26	2	3	4	2	4	4	2	1	1	1	3	1	1	2	3	1	3	1	1	4	1	1	2	1	2	1	1	2	4	2	1	1	4	1	4	1	4	3	4	1	1	4	2	1	3	4	1	4	1
27	2	2	4	2	3	1	2	1	4	1	4	1	2	3	1	1	2	1	4	1	4	2	2	4	2	1	3	2	1	4	2	1	1	1	3	4	1	4	1	1	4	1	2	3	4	3	3	1	3
28	1	1	1	2	4	2	4	4	4	2	1	4	4	4	1	4	4	1	1	3	4	4	1	4	4	3	4	1	1	1	1	1	1	2	1	3	1	3	1	1	4	2	2	1	1	1	3	4	2
29	4	4	1	1	2	1	2	3	1	2	4	4	2	1	4	1	1	1	4	4	4	1	1	1	1	2	3	1	4	2	4	1	4	3	1	4	3	1	1	1	4	3	1	1	3	1	2	1	2
30	1	3	2	2	1	4	2	1	4	2	1	4	2	2	4	4	4	2	2	2	4	2	3	1	2	2	4	2	4	4	1	3	1	2	1	3	1	2	1	4	4	1	1	1	1	2	1	2	2
31	2	1	1	1	2	1	3	4	3	1	1	1	4	1	4	2	1	1	1	4	4	2	4	1	3	3	4	1	4	4	3	1	1	1	1	4	2	2	4	4	3	4	1	2	4	2	3	4	1
32	1	1	1	4	1	3	4	1	4	1	1	4	1	1	1	2	3	4	4	3	4	2	1	1	1	4	2	4	2	2	2	1	4	1	1	3	1	4	2	1	2	2	2	1	2	2	1	1	4
33	4	4	1	1	2	4	2	2	3	4	4	3	1	4	1	3	1	1	1	1	4	1	1	1	2	1	1	2	3	4	1	4	1	1	4	1	3	1	2	3	4	4	3	3	4	1	1	4	2
34	1	4	4	1	1	2	3	1	1	3	4	1	4	3	1	1	1	4	1	2	1	1	1	1	4	1	4	1	3	1	2	4	1	2	1	4	4	3	1	1	1	1	2	2	2	1	1	1	1
35	1	2	4	1	1	1	1	1	2	2	1	1	1	4	2	1	1	1	1	1	1	1	2	1	1	4	4	2	2	1	2	1	1	4	3	1	3	3	3	2	1	4	1	2	1	2	3	4	2
36	4	1	4	4	3	2	4	4	4	2	3	1	2	1	1	1	1	4	1	1	3	1	1	4	1	3	4	2	1	4	4	4	1	4	3	4	4	4	1	3	4	2	1	1	1	2	2	2	2
37	2	2	1	4	1	1	4	1	4	3	4	4	1	4	2	4	1	1	1	1	1	1	2	3	4	1	4	4	4	1	1	1	1	2	1	3	3	4	1	3	4	2	2	1	2	1	1	1	4
38	3	4	1	2	4	2	2	1	1	1	4	1	4	1	2	2	3	2	4	1	4	1	4	1	1	1	4	4	1	2	1	4	2	1	4	4	3	4	1	2	1	2	4	4	2	1	4	4	1
39	2	1	2	1	1	4	4	2	4	1	4	3	1	1	1	1	3	1	1	1	1	1	4	2	3	4	1	1	4	4	1	4	1	1	1	4	4	1	2	2	4	4	3	4	1	2	4	4	4
40	4	4	2	4	3	1	1	4	4	3	1	1	3	1	1	3	4	2	2	4	4	4	4	1	4	2	2	2	4	2	4	1	3	3	4	3	1	4	4	4	4	3	1	1	1	4	1	2	1
41	3	4	3	1	1	4	1	4	1	4	1	4	4	1	2	1	4	2	1	1	4	4	4	2	4	4	4	4	1	2	1	4	1	1	3	1	3	1	4	3	4	1	1	1	1	4	2	4	4
42	3	1	2	1	4	1	2	4	4	4	1	1	1	2	3	1	1	2	2	4	2	1	4	4	2	4	4	1	4	1	4	4	4	2	2	1	4	1	1	3	4	1	2	1	2	1	1	2	1
43	3	4	4	4	1	4	1	4	3	3	4	2	1	4	1	1	1	1	1	1	2	4	4	1	2	1	4	4	1	1	4	1	4	1	4	1	1	3	4	4	3	1	4	1	4	3	1	3	3
44	1	1	2	1	1	1	4	1	1	4	1	4	4	1	2	1	3	3	3	4	1	3	2	1	3	1	1	1	1	2	1	2	3	3	4	1	4	1	2	3	4	4	1	4	1	4	1	4	4
45	1	4	2	1	1	4	2	2	1	3	4	2	1	3	4	4	1	2	1	1	2	1	1	1	1	4	1	1	2	1	2	1	1	2	2	2	3	4	1	1	2	2	4	1	1	1	1	3	1
46	3	4	2	1	1	1	2	4	1	2	1	1	4	4	1	4	4	2	1	2	2	4	4	2	1	1	2	2	2	2	1	4	1	1	2	1	4	1	2	1	1	2	2	4	4	4	1	2	1
47	3	4	3	3	4	1	1	4	2	4	1	4	2	2	2	2	3	4	4	4	1	4	1	3	3	1	1	4	1	1	4	1	3	1	4	4	4	4	1	1	1	1	1	4	2	1	1	2	3
48	4	2	1	1	1	4	1	4	2	2	4	3	1	1	1	2	4	2	1	4	1	4	1	2	1	1	3	3	1	1	4	1	2	1	1	3	3	4	3	4	4	4	4	1	1	1	1	2	3
49	4	4	1	4	2	4	4	1	3	1	4	2	3	2	4	4	1	1	1	1	2	2	4	1	2	3	1	1	1	1	4	2	3	1	3	4	3	4	1	3	4	3	3	1	1	1	1	3	4
50	4	1	1	3	4	2	1	4	2	4	4	2	3	1	1	2	4	4	4	3	4	4	1	2	3	1	3	1	3	1	1	3	4	4	4	2	2	4	2	4	4	2	1	1	2	1	3	3	3
51	3	1	1	1	1	2	1	2	2	2	4	2	2	1	1	1	2	1	4	1	1	1	4	3	4	4	2	1	4	2	2	1	3	1	4	2	1	1	1	4	1	3	4	1	4	4	3	4	4
52	1	1	2	1	1	2	3	4	2	1	2	4	4	4	2	4	1	2	1	1	2	4	1	1	1	1	4	3	1	2	3	4	1	4	1	2	2	4	2	1	4	2	3	4	1	1	2	2	1
53	4	4	3	4	4	4	4	4	4	1	4	4	2	3	1	4	1	2	4	1	2	1	4	2	4	1	4	3	4	2	1	1	1	3	1	3	3	3	2	1	2	4	4	4	1	4	1	4	4
54	3	1	3	3	4	1	2	4	2	3	4	4	4	1	2	3	4	4	3	4	2	4	1	1	1	1	2	1	1	3	1	1	1	4	2	3	3	4	1	4	4	1	4	2	2	4	1	1	1
55	2	1	1	1	1	1	2	1	2	1	1	3	1	1	4	4	4	1	3	1	1	1	4	1	2	3	4	2	2	3	1	1	4	4	1	3	4	4	2	3	1	1	2	1	1	4	2	2	4
56	2	4	4	3	4	1	1	4	4	3	4	1	2	4	2	2	4	1	4	2	1	1	1	4	1	4	4	3	1	4	3	4	4	1	4	2	1	4	2	4	2	1	3	4	1	4	1	2	2
57	4	1	1	1	4	3	3	2	3	2	4	2	1	4	2	1	4	1	1	1	2	1	1	4	4	1	2	3	4	2	1	1	1	3	1	3	4	1	2	1	1	1	1	2	2	4	1	4	2
58	1	4	1	1	1	2	3	4	4	4	1	2	1	1	2	2	4	2	2	1	4	4	4	1	4	4	1	2	3	2	1	1	2	1	1	4	3	1	1	3	1	2	4	1	1	1	3	4	4
59	1	4	1	4	1	2	1	4	1	3	1	1	4	2	1	2	3	1	1	4	4	1	4	1	4	1	1	2	4	2	1	4	2	1	3	3	3	4	2	1	1	1	4	1	2	4	4	2	2
60	1	2	1	4	1	1	4	1	1	1	1	1	3	4	1	1	1	1	4	2	4	4	1	1	1	1	4	1	3	1	2	1	4	4	1	2	1	4	2	1	4	4	3	4	3	1	1	2	2
61	1	2	4	3	1	1	1	4	2	1	1	1	4	4	2	1	3	1	1	2	2	1	1	1	4	1	2	1	4	1	1	1	1	4	1	1	1	2	2	1	4	1	1	4	1	1	4	2	1
62	1	2	4	1	3	4	4	4	2	2	1	1	4	4	1	1	4	1	1	3	4	2	4	4	2	3	1	2	2	2	2	1	2	4	1	3	1	1	2	1	1	1	4	2	2	2	3	1	4
63	1	1	1	1	1	1	4	4	4	1	4	1	2	1	4	4	4	1	1	2	1	3	4	3	1	1	2	3	1	1	2	1	4	2	1	4	2	1	1	1	4	1	1	2	1	1	3	1	1
64	1	4	1	1	3	1	1	2	1	1	1	4	1	4	4	1	3	1	1	1	1	2	1	1	1	4	1	1	2	1	1	1	1	2	2	1	1	1	4	3	4	4	4	3	1	2	1	3	4
65	1	2	2	4	4	1	1	1	1	3	1	2	1	4	1	3	4	1	1	1	1	3	1	1	4	4	1	1	3	1	3	1	1	2	1	1	1	4	1	1	1	1	1	4	1	4	4	1	1
66	2	4	1	4	4	4	1	1	4	4	4	4	2	1	4	2	1	1	4	1	3	4	4	1	1	1	4	1	1	1	1	1	4	2	4	4	2	1	1	1	3	1	2	3	4	1	3	4	1
67	1	1	4	1	4	4	4	4	1	1	4	4	1	1	4	2	3	1	2	4	4	2	1	2	1	3	1	2	3	4	3	1	1	1	4	1	1	3	4	1	1	1	2	4	1	1	3	4	1
68	3	1	1	1	1	1	2	3	4	4	4	3	4	1	4	2	1	4	1	4	4	1	1	4	1	4	1	1	2	1	1	3	4	2	4	1	2	1	1	2	3	4	4	1	4	4	1	4	1
69	2	1	4	2	2	4	4	4	1	4	4	4	4	4	1	4	3	4	2	1	4	1	2	1	1	4	4	4	2	2	4	3	4	1	1	2	4	2	4	1	1	2	1	1	2	4	1	3	1
70	1	1	1	2	4	4	1	4	1	4	4	1	3	1	1	1	3	1	2	3	1	2	4	1	1	3	1	2	1	1	2	2	4	3	1	1	2	1	3	4	2	4	2	4	4	1	1	1	1
71	3	4	1	2	1	3	1	1	1	4	1	3	2	4	4	4	4	1	1	1	1	2	2	4	1	1	2	1	1	1	1	3	4	4	4	1	2	4	4	2	1	3	2	1	1	4	1	4	3
72	1	1	1	1	2	1	1	4	1	2	2	1	1	1	4	1	2	1	2	4	1	3	3	4	3	1	1	1	1	4	1	4	1	1	2	4	4	1	4	2	1	1	2	3	4	4	4	1	1
73	1	3	4	2	1	1	1	4	2	1	3	1	4	3	1	2	3	4	4	1	4	2	2	4	2	1	4	2	2	2	2	4	3	4	4	1	2	3	4	4	3	4	2	3	1	1	4	2	1
74	1	3	3	1	4	1	2	2	4	1	4	4	3	1	2	4	4	4	1	4	2	4	4	2	4	3	3	1	4	2	2	3	1	3	1	4	3	3	4	3	1	4	1	3	1	2	1	4	1
75	1	4	1	4	2	4	2	2	1	2	1	2	2	1	4	1	1	4	4	4	4	2	2	4	4	4	2	2	2	4	1	1	1	2	2	4	2	4	4	4	1	4	3	3	4	1	4	1	1
76	2	3	1	4	1	4	3	3	1	4	4	3	3	1	3	3	3	4	3	1	4	4	2	4	4	4	2	4	2	4	1	4	4	1	4	2	3	4	4	1	3	4	2	4	1	2	4	4	3
77	1	4	1	4	4	1	2	4	4	2	2	1	1	2	2	4	4	2	1	1	1	1	1	4	4	2	2	1	4	4	1	1	1	1	1	4	3	3	4	1	4	2	1	1	4	2	1	4	1
78	1	4	2	4	2	2	4	1	4	3	1	1	2	1	2	2	4	2	4	1	4	2	2	1	1	1	4	4	4	2	1	1	4	4	4	4	4	1	1	1	4	4	2	1	1	1	2	2	4
79	2	1	1	4	2	4	1	1	4	1	1	3	4	2	2	1	2	1	1	1	4	2	2	1	3	4	3	1	1	4	2	1	1	4	2	3	2	4	4	1	1	4	1	4	3	4	1	2	4
80	4	2	1	4	1	4	4	3	3	4	4	4	1	2	3	4	1	1	1	2	1	4	1	4	1	2	1	3	1	4	1	2	1	1	2	3	4	4	4	1	1	1	1	4	3	4	1	4	1
81	4	3	4	4	2	1	2	2	4	1	2	4	4	2	4	4	2	1	2	1	4	1	3	3	1	2	3	4	1	3	1	1	1	1	4	3	4	1	1	1	1	2	2	2	2	1	4	2	2
82	4	1	1	1	1	2	3	4	4	2	1	1	1	2	1	4	1	4	4	2	4	1	2	1	4	4	1	3	1	3	4	1	1	4	2	1	1	1	1	4	1	3	4	3	4	4	1	1	4
83	1	3	1	4	3	1	1	1	1	1	2	3	4	2	1	1	1	1	4	1	4	1	4	3	1	1	3	4	2	1	1	4	4	4	2	3	1	3	3	1	3	3	4	2	4	1	1	3	2
84	4	2	3	1	2	1	1	1	4	2	1	1	1	2	2	2	2	1	4	1	1	1	2	3	4	4	1	4	4	4	3	1	2	1	2	2	1	3	4	2	1	4	4	2	1	4	2	3	4
85	3	4	4	2	1	1	1	1	2	1	4	2	2	1	4	4	1	2	1	1	3	4	1	1	1	1	2	2	1	4	1	1	1	1	2	1	1	2	4	4	1	2	4	1	4	1	4	4	4
86	1	3	4	4	1	1	1	1	1	2	1	2	4	2	3	4	1	1	1	2	2	3	2	1	1	1	4	2	1	1	4	2	4	4	1	4	1	2	2	1	4	1	4	2	1	2	3	3	1
87	4	4	2	2	1	3	4	3	3	4	3	4	1	3	1	4	1	2	1	3	3	1	2	2	4	1	4	2	3	3	1	1	3	1	1	2	4	1	4	4	2	4	1	2	2	4	1	4	2
88	4	1	1	4	2	2	3	2	1	1	3	1	2	4	4	1	2	1	4	2	2	1	1	3	4	4	4	4	2	1	1	2	3	4	4	4	1	1	2	1	1	4	1	2	1	4	4	4	1
89	1	1	1	1	2	3	4	1	1	2	4	4	4	4	3	4	1	4	4	1	1	4	2	1	4	1	1	4	1	1	4	4	3	1	4	1	4	3	4	3	4	1	4	1	4	1	3	1	1
90	4	2	1	4	1	1	3	1	1	4	1	3	4	2	4	3	1	4	1	4	1	4	2	1	2	4	4	2	2	1	2	3	1	1	1	1	4	2	2	1	4	4	1	4	2	3	1	1	2
91	1	3	3	1	4	4	4	1	3	4	1	4	1	2	4	4	2	1	1	1	1	4	1	1	1	1	4	1	1	1	4	3	4	1	2	2	4	2	1	1	2	1	1	1	4	4	2	1	1
92	1	1	4	1	1	2	3	4	1	4	2	1	1	2	3	4	1	1	1	2	2	1	2	1	1	1	4	2	1	1	1	2	2	1	2	1	2	2	1	1	1	1	3	1	1	1	4	4	2
93	2	4	4	1	1	4	1	1	1	1	1	1	4	2	4	3	1	1	1	2	2	1	4	4	1	3	4	2	3	1	1	1	3	4	2	2	4	2	1	1	1	4	1	4	3	1	4	1	4
94	1	3	1	1	2	2	1	1	4	1	2	2	3	4	4	1	1	3	4	1	1	2	2	1	1	1	4	4	2	4	2	1	3	1	2	2	1	2	1	2	1	4	2	2	1	1	2	1	4
95	1	4	4	1	1	1	1	2	3	1	2	1	1	1	1	1	2	1	1	4	4	1	1	2	1	2	1	1	2	4	2	1	1	1	1	1	1	2	4	1	3	4	4	2	2	1	1	4	1
96	2	2	1	3	1	3	1	2	4	4	2	1	1	2	4	2	2	3	1	1	1	1	1	1	2	2	3	4	4	3	1	1	1	1	2	3	4	4	4	1	2	1	1	1	1	4	2	1	2
97	4	4	2	2	1	1	3	4	2	4	1	4	1	2	4	4	1	1	4	1	1	1	2	4	1	1	4	4	1	1	1	2	1	4	1	1	1	2	4	2	4	3	1	2	2	4	2	1	1
98	1	4	4	1	2	4	4	1	1	2	1	1	1	1	4	2	4	4	1	1	1	4	2	4	4	2	1	2	2	1	1	2	2	3	4	3	1	1	2	4	2	1	1	2	1	1	2	4	1
99	1	1	4	1	2	1	1	1	1	4	1	4	1	4	4	1	1	1	4	2	1	4	2	1	2	4	4	4	2	4	1	1	1	1	1	1	4	1	3	1	1	4	2	4	3	4	1	1	4
100	4	1	1	4	3	3	1	1	3	1	1	3	1	1	3	1	2	2	1	4	4	1	4	4	1	1	1	3	4	3	4	1	2	3	1	1	4	1	1	4	2	2	1	1	2	4	4	4	1
101	1	1	1	4	1	2	1	1	4	1	4	1	1	1	2	2	1	2	4	2	1	4	2	4	4	4	1	4	1	4	2	2	3	1	4	4	4	1	1	1	2	2	4	3	1	1	3	3	1
102	1	1	4	1	1	3	1	3	1	2	1	4	1	1	3	1	1	2	1	2	3	1	1	1	1	1	4	1	1	2	4	2	1	4	2	2	2	1	1	1	4	3	4	2	4	1	1	2	1
103	1	2	1	1	2	2	4	2	1	1	1	2	3	1	3	4	1	1	1	1	3	1	3	1	1	3	1	1	4	4	4	4	1	4	3	4	4	1	4	1	1	1	4	2	2	1	4	4	3
104	4	1	4	2	3	1	1	2	1	3	2	2	1	2	1	1	1	1	1	2	2	3	2	1	4	2	1	1	2	4	4	1	3	4	4	4	2	3	1	1	1	4	1	2	1	2	3	1	1
105	1	1	3	2	2	1	4	1	1	4	1	4	4	2	4	4	1	3	1	4	3	1	2	1	1	2	3	4	4	4	4	2	1	2	2	3	1	2	2	2	1	1	1	4	4	2	1	4	4
106	4	1	3	1	2	3	4	1	1	2	1	1	1	4	4	4	1	3	4	1	3	4	1	3	1	4	3	4	2	3	1	1	2	4	1	1	4	1	2	2	3	4	1	2	4	4	2	2	4
107	4	2	2	2	1	1	1	2	1	3	1	2	4	1	1	4	1	1	4	2	4	1	1	4	4	4	2	2	4	4	4	1	4	1	4	4	1	4	4	1	3	3	4	3	1	1	3	1	1
108	4	2	1	4	1	1	1	4	1	4	1	4	2	2	3	1	4	4	4	1	1	1	2	4	1	1	4	4	1	2	4	3	1	2	2	1	1	1	1	4	4	4	2	3	4	2	2	1	1
109	1	2	1	1	1	3	4	4	4	1	3	1	1	2	1	1	2	1	4	1	4	1	3	3	1	4	4	4	1	4	1	2	4	1	1	1	4	2	2	4	2	1	1	1	4	2	2	1	1
110	2	1	1	1	1	4	1	4	3	1	1	1	4	2	2	1	2	1	1	1	4	2	2	1	1	1	3	3	4	4	2	2	1	2	4	4	1	1	1	4	1	1	2	3	3	1	3	4	4
111	2	1	3	4	4	4	4	1	2	3	4	3	2	1	3	4	4	3	1	1	1	4	4	4	1	1	1	1	2	1	2	4	4	1	4	4	1	1	2	1	1	1	1	2	4	4	2	4	1
112	1	3	4	1	2	2	3	1	2	1	2	1	2	3	1	1	2	4	1	3	1	1	3	4	1	4	4	1	4	1	4	1	1	1	3	3	1	1	4	3	4	1	4	2	1	3	1	2	4
113	4	1	1	4	4	4	1	3	3	1	3	1	1	2	4	4	1	4	2	2	1	4	2	3	4	1	1	2	4	2	2	2	3	4	4	4	1	3	1	1	2	2	4	1	1	3	4	2	4
114	2	3	1	4	1	4	1	2	1	1	2	2	4	2	1	1	2	1	1	1	4	4	1	1	1	4	4	3	2	2	4	1	3	1	1	4	1	1	1	4	2	3	1	2	1	1	1	1	4
115	1	1	2	2	1	4	1	3	1	1	1	3	4	4	1	4	2	3	1	1	3	4	2	2	4	4	4	4	2	1	2	4	1	4	1	3	1	1	1	1	2	1	1	1	4	2	1	1	2
116	1	1	3	1	4	4	4	1	2	4	2	4	4	2	1	1	1	4	1	4	4	1	1	1	4	1	1	1	4	3	1	1	4	4	2	2	4	2	1	2	1	2	4	4	1	3	1	1	4
117	3	3	1	3	1	4	1	3	1	4	3	4	1	1	2	3	3	3	1	1	4	1	1	4	1	1	1	4	4	4	4	1	1	4	4	1	4	1	1	1	2	3	4	4	3	4	1	1	4
118	4	1	1	1	2	2	4	2	1	1	1	3	4	1	1	4	2	1	3	3	3	1	1	4	1	4	2	2	3	4	1	2	2	1	1	4	4	4	2	2	1	2	1	1	3	1	4	4	1
119	1	1	1	1	2	1	4	1	3	1	2	4	4	1	4	1	2	3	1	1	1	1	1	2	1	3	1	1	2	2	4	1	1	4	1	4	1	4	4	1	1	4	2	2	3	4	4	3	4
120	1	1	4	4	2	1	1	1	4	1	2	1	1	1	4	2	2	3	2	4	4	1	1	1	4	2	2	1	2	2	1	3	1	4	4	4	1	4	4	1	1	1	3	2	2	1	1	2	3
121	4	1	4	1	1	1	1	1	1	4	1	4	1	4	3	1	1	3	1	2	4	1	1	4	4	4	1	4	4	1	4	2	1	4	2	2	2	4	2	2	2	1	2	2	4	4	1	3	4
122	1	1	3	1	4	1	4	4	3	4	4	1	3	1	1	1	2	2	4	2	4	4	1	3	1	3	3	1	2	2	3	1	1	1	2	2	1	4	1	4	4	4	2	1	4	1	1	2	1
123	1	4	4	4	1	1	1	2	1	2	4	4	1	1	4	1	1	1	2	1	2	1	2	1	4	4	4	1	1	3	1	1	3	1	2	1	2	2	4	4	2	2	1	1	1	4	2	3	4
124	2	4	4	1	2	4	1	2	1	1	1	1	4	3	1	1	1	4	4	2	4	1	2	2	4	3	1	4	4	2	4	4	1	4	1	2	1	2	2	4	2	3	4	4	4	4	2	3	1
125	1	1	1	4	2	4	1	3	1	1	2	1	1	1	4	1	1	2	4	4	4	4	1	2	1	4	1	1	1	1	3	1	3	4	3	1	4	1	1	2	1	2	4	2	4	4	1	4	4
126	1	4	1	1	4	1	4	1	4	2	1	3	1	3	3	1	1	3	4	1	2	4	1	1	4	4	4	1	1	4	1	2	1	1	1	1	1	4	4	1	1	2	1	3	4	1	4	4	1
127	1	2	1	4	1	1	1	1	1	1	4	3	1	4	4	4	1	3	1	2	1	4	2	1	1	2	1	1	4	4	1	1	1	3	4	4	2	4	4	4	4	4	1	2	1	1	2	1	1
128	4	4	1	3	4	2	4	2	3	1	2	3	4	4	3	4	3	1	1	2	2	1	4	2	2	2	4	1	4	4	1	1	1	1	4	3	4	4	4	1	3	1	1	4	1	4	2	1	1
129	2	2	1	1	1	4	2	4	1	4	2	1	2	4	1	4	1	1	1	2	4	2	2	2	4	3	1	1	2	1	1	1	3	1	4	1	4	1	1	1	1	2	3	4	3	4	1	2	4
130	1	2	4	1	4	3	4	2	4	1	2	3	4	4	1	4	3	1	1	1	1	4	2	3	1	2	1	4	1	1	1	4	4	4	1	1	2	2	1	4	1	4	2	4	2	4	1	3	4
131	1	1	1	2	2	2	1	1	2	4	4	4	4	1	4	2	4	4	1	2	2	1	1	4	4	1	2	3	1	3	1	2	1	1	4	4	4	2	1	1	1	4	1	4	2	1	4	1	1
132	1	2	1	1	2	1	1	1	1	2	1	4	1	4	1	1	4	1	1	2	1	1	3	4	1	4	4	1	1	4	1	4	1	1	1	3	3	3	3	1	3	4	1	1	4	1	4	4	1
133	1	4	4	1	1	1	1	1	1	1	3	3	2	1	1	1	4	1	2	1	4	2	2	1	2	3	4	4	4	4	2	1	1	2	1	1	1	3	4	2	1	1	1	3	1	2	1	1	1
134	2	4	4	1	2	1	1	4	1	4	4	4	1	1	3	2	1	1	1	1	2	1	3	1	2	3	1	2	1	2	1	1	2	3	1	1	1	4	1	4	3	1	1	2	4	2	1	1	1
135	4	4	4	1	2	4	4	3	4	1	4	4	1	2	1	1	3	1	4	1	4	2	2	1	1	4	2	4	4	1	2	4	1	1	2	4	2	1	4	2	1	4	2	4	4	2	4	3	4
136	1	2	4	1	2	1	2	1	4	4	3	4	4	4	2	2	1	2	4	4	4	2	1	2	4	2	3	1	4	1	4	1	4	2	2	2	1	2	1	1	4	2	1	1	1	1	4	1	2
137	3	3	4	3	1	1	1	4	4	2	4	1	1	1	1	2	2	1	2	1	1	3	4	4	4	2	4	2	2	2	4	1	4	3	1	1	4	2	4	4	3	1	3	4	4	2	1	1	1
138	1	1	4	2	1	2	4	2	3	4	4	4	3	1	3	1	1	1	4	2	3	1	1	4	1	1	1	4	2	1	4	1	4	1	1	1	4	1	2	1	1	1	1	1	1	1	2	3	1
139	1	3	4	4	4	2	4	1	4	2	1	2	4	2	3	1	1	2	4	2	3	1	1	4	2	3	4	1	2	1	1	2	2	4	2	1	1	2	3	4	1	1	1	2	3	1	1	1	4
140	1	2	1	4	1	2	1	1	3	1	4	3	1	3	1	4	2	3	1	1	2	1	3	1	1	1	2	4	4	4	1	1	1	4	2	3	4	1	1	1	1	3	1	3	4	4	1	2	4
141	4	4	4	4	1	4	3	1	4	4	1	2	1	4	4	1	4	3	4	3	1	4	2	2	4	2	3	1	2	1	1	4	1	4	2	2	1	2	2	2	1	4	1	3	4	4	2	1	1
142	1	3	3	1	3	1	4	2	4	4	1	4	4	1	3	4	3	3	1	1	1	1	4	3	1	2	3	4	3	1	1	2	3	3	3	4	1	4	1	3	4	2	2	1	2	1	2	2	4
143	4	2	4	1	1	1	1	4	3	1	2	4	4	3	1	1	3	1	4	3	3	4	2	2	4	1	3	1	1	1	1	2	3	1	1	4	2	3	3	4	1	4	4	1	4	1	1	1	1
144	4	1	1	1	1	1	4	1	4	1	2	2	3	1	1	1	1	4	1	2	2	4	1	1	4	1	4	2	1	4	4	4	4	4	1	2	1	4	1	4	4	2	2	1	2	4	2	1	4
145	1	2	2	1	1	4	1	1	2	1	1	1	1	2	3	4	4	4	1	1	4	1	2	1	4	1	1	4	1	4	1	1	1	1	2	1	1	4	4	2	1	1	1	2	2	4	4	2	4
146	4	2	4	1	3	3	1	1	1	3	1	1	1	2	1	4	1	3	4	1	1	1	1	1	2	3	3	4	4	1	4	1	4	2	2	4	1	2	4	4	2	4	1	3	1	1	2	2	2
147	3	1	1	4	2	2	1	2	1	1	1	3	2	1	4	1	2	2	4	4	4	4	2	1	1	1	2	1	1	2	4	1	4	1	2	1	1	2	4	1	4	2	2	1	4	4	4	1	4
148	4	1	3	1	4	4	4	1	1	2	1	1	2	4	4	1	2	1	4	1	1	1	4	4	1	1	3	4	1	1	1	3	1	1	2	4	4	1	4	4	2	1	1	1	4	3	4	4	1
149	4	1	4	1	2	4	4	2	1	4	2	1	1	4	3	4	2	1	1	1	1	4	2	1	1	2	3	4	4	4	4	1	3	4	4	2	3	1	4	4	4	1	4	1	1	1	2	2	4
150	4	2	1	4	1	4	4	2	4	4	2	4	4	2	1	2	2	1	1	4	2	2	2	1	4	2	3	4	1	4	1	2	3	1	1	2	1	2	2	4	1	4	1	1	2	2	4	4	4
151	4	4	4	1	2	1	1	2	1	4	1	1	1	2	1	1	2	1	4	1	3	1	1	3	4	1	1	4	2	1	4	1	2	2	4	2	2	2	4	1	2	1	1	2	3	4	3	4	1
152	1	1	1	2	2	1	4	4	4	1	4	4	1	2	1	1	1	4	1	2	1	2	1	2	4	4	1	4	1	1	1	2	1	4	1	1	4	4	2	2	1	1	2	1	1	1	1	1	3
153	1	4	2	4	2	3	1	4	4	1	4	2	2	3	2	1	1	3	4	1	3	1	3	1	4	1	4	4	2	1	1	1	1	4	1	1	1	1	2	1	1	4	4	1	1	3	4	1	4
154	2	1	4	4	1	3	4	1	1	1	1	3	4	1	4	2	1	1	1	4	2	4	3	1	4	2	4	4	2	4	1	1	2	4	1	1	1	1	1	4	1	1	1	2	1	4	2	1	1
155	4	3	4	4	2	1	1	1	3	1	4	4	1	2	1	1	1	3	1	1	2	3	4	4	1	1	4	1	1	4	1	2	1	4	1	1	1	1	2	1	2	4	1	1	2	1	3	4	4
156	2	1	1	4	1	4	2	4	1	4	4	4	1	1	3	4	3	4	4	2	4	4	1	2	3	2	4	1	2	4	4	2	1	2	2	1	4	1	2	2	2	1	1	4	3	1	2	1	4
157	4	2	2	1	3	1	1	4	4	1	1	3	1	2	3	4	2	4	2	4	4	4	1	1	1	1	4	2	1	4	1	2	2	1	1	1	2	1	4	1	1	1	1	1	2	1	2	1	1
158	2	2	1	3	1	1	1	1	4	4	4	1	4	2	2	4	1	1	4	2	2	1	1	1	4	4	4	1	1	2	1	4	1	2	2	1	2	2	4	2	4	1	1	2	2	2	4	4	2
159	4	1	1	4	1	1	1	1	1	2	1	4	4	1	1	4	2	4	2	1	2	4	1	1	2	3	1	2	2	1	1	2	1	1	1	1	1	4	1	4	4	4	1	1	1	1	1	2	4
160	1	1	1	4	1	2	3	2	1	1	2	3	1	3	4	4	2	2	3	4	1	3	1	1	2	1	1	1	2	1	1	2	4	1	2	4	4	2	3	1	2	2	4	2	3	4	4	4	1
161	2	1	1	1	2	1	1	2	1	1	3	4	4	1	3	1	1	1	2	4	3	1	2	1	2	4	4	4	2	1	2	1	1	1	2	3	1	1	4	1	1	1	1	2	1	2	4	4	4
162	2	2	4	2	1	1	2	4	1	1	1	1	4	2	2	3	1	1	3	4	2	2	4	1	3	1	4	2	2	1	1	4	2	1	1	1	1	1	2	1	1	1	1	1	1	1	2	2	1
163	4	4	4	1	3	1	1	4	3	2	3	4	4	4	1	1	1	1	3	1	3	1	1	2	3	1	2	1	1	1	1	2	4	3	4	1	3	1	1	1	3	1	3	1	2	2	1	4	4
164	4	1	2	3	1	1	4	2	3	3	4	1	4	4	1	2	2	2	3	4	1	1	4	4	2	2	2	2	1	2	1	1	2	4	4	2	2	3	1	1	2	2	4	4	2	4	1	1	3
165	1	4	4	4	2	1	2	1	3	1	1	3	4	4	1	1	1	1	3	4	3	4	1	4	4	4	2	2	4	2	1	4	2	1	4	1	4	2	1	1	4	4	1	4	4	3	1	2	3
166	2	1	1	1	1	3	4	1	2	3	4	4	4	1	3	4	1	2	2	4	1	1	4	2	4	1	1	1	2	2	1	1	4	4	1	3	4	4	4	4	1	4	1	4	1	2	2	3	4
167	1	3	3	1	1	1	1	1	1	1	1	2	2	4	1	3	1	4	4	1	1	3	1	3	4	1	1	1	1	2	1	4	1	3	4	1	3	1	2	1	2	1	1	4	1	2	4	2	3
168	4	4	1	1	2	3	4	1	2	1	1	1	3	4	1	1	2	4	1	4	3	3	1	1	3	4	1	2	3	1	2	1	1	1	4	4	4	4	1	1	4	2	4	1	1	3	1	1	4
169	4	1	2	4	1	2	1	4	2	3	1	2	1	4	1	1	1	1	1	1	2	1	3	4	4	4	1	4	1	4	4	3	4	4	4	2	1	1	2	2	1	1	3	4	1	1	1	3	1
170	3	1	1	2	4	2	4	3	1	1	1	2	2	2	1	3	4	1	4	1	2	1	4	2	1	1	1	4	1	2	4	1	3	4	1	2	1	1	1	4	1	1	1	3	4	3	1	1	1
171	1	2	4	1	4	2	4	1	1	4	4	2	3	1	1	3	4	1	1	1	2	4	1	2	3	4	2	1	4	1	2	4	2	1	4	1	3	1	2	3	1	3	4	1	2	3	1	1	1
172	4	1	2	3	1	3	4	4	2	1	1	2	2	4	2	2	4	1	1	3	2	1	4	2	2	4	4	2	3	1	3	1	4	3	4	1	4	4	1	3	4	1	1	4	2	1	2	4	3
173	3	1	3	4	1	2	1	1	2	1	1	4	4	4	2	1	1	1	2	1	4	1	4	1	2	4	4	4	4	2	1	3	4	3	4	4	4	4	2	4	1	3	4	4	2	1	4	2	2
174	1	1	2	3	1	4	4	2	3	1	2	2	1	1	1	3	4	1	3	1	1	1	1	2	3	4	4	2	2	2	4	1	2	3	4	1	1	2	1	1	4	1	1	2	2	1	2	3	4
175	4	1	4	4	1	4	4	1	4	4	4	3	4	4	2	2	4	2	2	1	1	1	1	2	3	1	2	1	2	2	1	4	1	1	4	1	4	1	1	1	1	3	1	1	1	4	4	1	1
176	1	1	1	2	4	4	4	4	1	1	4	2	1	4	2	1	1	1	1	4	1	4	1	2	4	4	1	1	4	2	4	4	2	2	2	1	2	4	4	3	1	2	3	4	4	1	4	4	1
177	1	1	4	1	4	1	3	1	3	3	4	1	2	4	2	1	1	2	4	1	2	3	4	2	4	4	4	1	4	1	4	4	2	3	4	2	3	4	3	4	4	4	3	4	2	4	1	1	2
178	3	1	2	2	1	1	2	4	1	4	1	4	2	4	1	1	4	2	3	4	1	1	2	1	3	4	1	4	1	4	4	4	2	1	1	2	1	1	2	4	1	2	1	1	3	3	1	1	2
179	2	4	2	1	1	2	4	1	1	1	1	2	1	2	4	2	4	4	4	2	1	1	1	4	3	1	2	2	4	1	3	1	3	4	1	1	4	1	3	4	4	2	1	4	4	4	4	2	1
180	4	1	1	4	4	1	4	1	2	4	4	2	1	4	2	1	4	2	4	1	1	1	3	1	3	1	4	4	4	1	1	2	1	1	2	4	1	4	2	4	1	2	1	4	2	1	4	1	1
181	4	1	2	2	1	4	1	4	1	4	3	4	3	4	1	1	4	1	4	4	1	4	2	4	4	4	1	4	4	1	1	4	1	3	4	1	4	1	1	1	4	1	1	1	2	1	4	1	3
182	2	1	1	1	2	2	1	1	4	4	4	2	4	1	2	2	4	1	1	2	1	4	1	4	4	4	1	1	4	2	1	4	4	3	1	1	3	1	2	2	2	3	1	2	1	3	1	1	3
183	3	1	4	4	1	1	1	2	1	1	1	4	1	4	4	4	4	2	1	1	2	1	1	4	4	1	1	4	2	2	2	4	3	1	1	2	2	3	1	4	4	1	4	1	4	3	1	2	1
184	1	4	1	4	1	2	1	4	1	3	1	2	1	2	3	4	4	3	1	1	2	3	1	1	3	4	2	3	4	1	1	1	2	3	1	2	1	4	2	1	2	4	4	4	4	1	4	4	2
185	3	4	2	4	3	1	1	2	2	4	4	2	1	4	2	4	2	1	4	2	1	1	2	1	1	1	1	4	3	4	4	4	2	2	1	1	3	4	2	2	1	4	1	4	4	4	1	2	2
186	4	1	4	1	1	1	2	4	1	4	2	2	2	1	1	1	1	4	1	4	2	1	4	2	1	1	1	1	4	1	4	4	1	4	1	2	1	4	2	3	4	2	3	1	1	1	4	2	4
187	3	2	1	1	4	2	3	4	1	1	1	1	4	1	1	4	1	2	4	4	2	1	4	2	2	2	1	1	1	2	1	1	2	1	1	2	2	1	4	1	4	2	2	1	1	3	1	2	1
188	1	2	2	4	4	2	1	1	1	1	4	2	1	4	1	1	2	1	1	1	1	3	3	4	4	4	1	2	1	2	4	2	1	4	4	2	2	4	4	2	3	1	1	1	4	2	2	2	1
189	3	1	4	3	4	1	3	4	3	1	1	1	1	1	2	2	4	1	3	4	4	4	4	4	3	4	4	4	1	1	3	4	2	4	1	3	4	4	1	1	1	1	3	1	1	3	1	4	3
190	1	1	1	2	1	2	2	1	4	4	4	2	1	4	1	1	1	4	4	4	2	1	1	4	4	1	1	4	1	4	3	4	2	1	1	1	4	1	2	1	1	1	1	4	3	3	4	2	2
191	1	4	2	1	1	1	2	1	1	4	4	1	2	1	4	1	4	1	1	1	1	1	4	4	2	4	1	4	2	2	4	1	2	1	4	1	1	1	1	4	1	3	1	1	3	4	1	2	3
192	3	4	2	1	4	2	1	1	1	1	4	1	4	1	2	1	1	1	4	1	3	1	1	1	4	1	2	1	4	2	2	4	1	3	4	4	4	4	2	1	2	2	2	4	4	1	4	2	1
193	1	1	1	4	1	2	3	1	4	1	1	4	1	1	1	4	1	1	1	4	4	4	1	1	2	3	4	1	3	1	4	2	4	1	1	4	4	1	1	4	4	4	4	1	4	1	4	2	4
194	4	1	1	1	1	3	4	1	4	1	1	1	1	1	4	2	2	1	2	2	1	1	2	4	4	1	1	1	1	1	4	2	2	3	1	1	1	3	4	4	1	2	1	4	1	1	1	2	1
195	1	1	2	2	1	1	4	1	2	1	1	2	1	1	2	1	1	1	2	1	2	1	1	3	4	4	1	3	4	1	1	1	2	1	2	2	1	1	1	4	1	2	3	1	1	1	2	3	1
196	1	4	1	4	1	1	4	4	1	4	2	1	1	1	4	4	2	1	3	1	2	1	2	2	1	4	2	3	4	1	4	1	4	4	1	3	3	4	2	1	1	1	1	1	1	3	4	1	4
197	2	1	4	4	1	2	1	4	1	4	1	3	3	1	3	4	4	1	3	1	3	4	4	1	2	2	2	3	4	4	4	1	1	3	1	2	1	1	1	1	1	2	1	2	1	4	1	1	2
198	1	1	1	1	1	4	1	4	1	3	1	1	1	1	2	4	4	1	3	4	1	1	2	2	4	1	1	2	1	2	2	4	1	2	1	1	2	2	2	1	1	1	2	3	1	1	1	3	4
199	1	1	4	4	4	1	1	4	1	4	1	2	3	4	3	4	1	1	4	1	2	1	1	1	1	1	2	3	4	1	3	1	1	4	1	2	4	4	3	3	4	1	1	4	4	4	4	4	2
200	4	4	3	4	4	1	1	4	4	3	4	1	4	2	1	1	4	2	4	1	4	3	4	1	2	4	2	2	4	2	4	4	2	1	1	4	4	4	1	4	1	1	2	1	1	2	1	1	1
201	2	1	2	1	1	1	4	3	2	3	1	4	4	1	1	4	4	1	2	4	2	1	4	2	1	2	2	4	1	3	4	1	2	1	1	4	4	2	4	3	4	2	2	1	4	4	4	4	1
202	2	4	2	1	4	2	1	4	2	1	4	1	4	1	1	1	1	1	1	3	4	1	1	4	1	1	1	2	1	2	1	2	2	4	2	2	2	1	1	2	1	4	4	1	3	4	1	4	4
203	1	4	1	4	2	4	4	1	1	1	3	1	4	1	2	4	1	4	4	3	4	4	3	3	1	2	1	2	2	1	3	4	4	4	4	4	1	1	1	1	1	2	1	2	1	2	1	1	1
204	2	3	4	4	3	4	4	1	2	1	2	4	4	4	4	4	1	3	4	3	1	1	3	1	4	2	1	1	1	4	1	2	1	1	3	1	1	2	1	1	1	1	4	1	1	1	2	3	4
205	1	4	1	1	1	1	4	4	4	1	1	1	3	4	1	1	1	1	2	4	2	1	2	2	4	2	1	2	1	2	1	1	1	4	1	2	3	4	1	1	1	1	1	1	2	1	1	1	4
206	1	4	2	4	4	2	4	3	1	4	4	2	1	4	2	4	4	1	3	1	2	2	1	2	1	4	2	1	1	3	1	1	1	3	4	1	1	1	1	1	4	1	1	1	4	4	1	1	2
207	2	1	4	1	3	1	3	2	1	1	1	3	1	2	1	3	1	2	1	1	1	1	2	1	2	1	1	4	2	1	2	1	2	3	1	3	4	1	1	1	4	1	2	2	1	4	1	1	1
208	4	4	1	4	1	3	1	1	2	3	4	3	1	1	2	1	4	1	1	1	1	3	1	4	3	4	1	2	4	2	4	4	2	4	1	1	1	4	1	2	1	1	4	4	1	2	3	1	1
209	2	1	2	4	2	2	2	4	1	2	1	1	3	4	1	4	1	4	3	4	1	3	1	1	3	3	1	4	1	1	1	3	2	3	1	1	1	1	2	1	4	1	2	1	2	3	1	4	3
210	1	4	1	2	1	2	4	4	1	1	1	1	1	3	1	1	1	2	4	1	1	1	4	1	2	3	4	4	1	3	4	4	1	3	1	1	2	4	3	2	1	3	1	1	1	2	1	2	1
211	1	2	2	3	4	1	2	1	2	1	3	1	1	1	2	3	4	1	2	4	3	1	1	2	4	4	2	4	1	2	1	4	1	1	1	2	4	1	1	1	1	2	3	4	1	1	2	2	4
212	3	4	2	3	2	2	3	4	1	3	1	1	4	1	1	4	4	1	2	3	4	4	2	1	1	4	1	4	2	1	1	1	2	3	4	2	1	3	3	3	1	2	3	1	3	4	1	1	2
213	1	1	1	3	4	1	2	1	1	2	4	1	1	2	4	4	1	2	2	1	2	1	1	3	4	3	1	1	1	1	1	3	1	1	3	1	3	1	1	4	1	1	4	1	1	1	4	1	4
214	2	4	2	1	1	2	1	1	2	3	1	4	4	1	1	1	4	1	3	4	1	4	4	4	3	4	3	2	4	1	3	4	1	1	2	1	2	4	1	1	1	4	4	1	3	1	1	2	1
215	2	2	1	3	4	4	1	4	3	1	1	2	3	1	1	4	4	2	4	1	1	1	1	4	4	1	1	1	1	2	1	4	2	1	1	2	3	4	1	2	4	3	3	1	1	3	4	4	4
216	1	4	2	2	4	1	1	2	1	4	1	1	2	4	4	3	4	4	4	4	1	4	1	1	2	4	1	2	4	1	3	4	1	4	4	1	2	4	1	1	2	4	4	4	1	3	1	3	1
217	3	1	2	3	3	1	3	1	2	3	1	4	4	1	1	4	4	2	2	4	2	2	4	2	4	4	2	2	1	2	4	1	2	2	1	1	2	4	2	3	4	1	4	1	1	1	1	2	2
218	4	4	2	1	1	3	1	1	2	3	1	1	4	2	1	1	1	1	1	3	2	3	1	3	1	1	2	3	4	2	4	1	4	3	1	1	2	4	2	3	1	1	1	4	4	3	1	1	1
219	1	1	1	4	2	1	3	4	2	3	1	1	4	2	2	3	1	1	2	2	2	1	1	1	4	2	2	2	4	3	2	4	1	3	1	1	3	4	1	2	3	4	4	4	1	3	1	2	3
220	2	2	1	1	4	2	3	4	1	4	2	4	1	4	4	4	4	1	4	2	2	2	2	1	4	2	2	3	4	2	2	1	4	2	2	1	1	1	1	2	3	1	1	1	2	1	1	1	4
221	4	1	3	3	4	2	2	4	1	4	1	4	4	1	1	1	4	4	4	2	2	3	1	2	3	1	1	3	1	2	2	4	3	1	2	1	3	1	2	1	4	4	4	1	2	3	1	3	4
222	4	4	2	4	2	1	3	4	2	1	4	2	2	4	4	4	1	1	3	4	2	3	4	4	4	1	2	2	2	3	4	1	1	3	4	2	3	1	1	1	2	2	1	4	1	3	1	2	2
223	1	4	2	4	4	1	4	2	2	3	1	2	3	1	1	3	1	2	4	4	1	3	1	1	1	3	4	3	4	1	1	3	1	3	1	2	1	3	1	4	1	2	1	1	1	2	1	1	4
224	4	4	1	1	2	4	1	4	1	4	2	2	2	1	1	2	4	2	4	4	2	2	1	2	2	1	2	3	1	4	4	1	2	2	4	2	4	4	4	3	4	1	4	2	1	1	1	2	1
225	3	1	1	3	4	2	2	3	4	4	1	1	4	2	2	3	4	1	2	4	2	3	1	1	2	3	2	4	4	1	1	1	2	2	4	1	2	3	1	4	2	2	3	1	2	2	4	1	3
226	2	4	2	2	4	4	4	1	2	4	4	1	2	1	4	4	1	1	4	1	1	1	1	3	3	3	3	3	1	2	3	4	2	1	2	2	3	1	3	1	2	1	1	1	2	3	4	1	4
227	2	1	1	4	1	2	1	1	1	4	1	1	1	2	1	1	1	1	3	1	1	1	1	2	1	4	2	2	1	1	1	4	4	4	1	2	1	4	4	4	1	2	3	4	1	2	4	1	3
228	4	4	1	2	1	2	1	1	1	1	1	4	4	1	2	2	3	2	2	1	3	4	4	2	1	1	2	2	1	2	4	1	3	1	1	1	1	1	1	2	4	2	3	4	2	3	1	1	4
229	4	4	2	2	2	3	2	1	1	3	1	2	3	3	1	4	2	2	3	3	2	2	4	4	2	2	2	3	2	2	3	4	2	4	1	2	4	1	1	1	3	2	3	1	1	2	4	2	1
230	1	1	1	1	1	4	4	1	1	3	1	1	3	1	2	3	4	1	4	1	1	1	4	2	1	1	1	2	4	2	1	1	2	2	1	2	1	1	2	3	4	1	1	2	1	2	1	1	4
231	1	1	3	4	1	2	1	4	1	3	3	3	4	2	4	3	1	2	2	1	3	1	1	4	4	4	2	1	1	1	4	4	4	4	1	1	1	1	1	2	4	2	3	4	1	4	4	2	1
232	4	1	4	3	1	2	4	1	2	2	4	3	1	1	1	2	1	3	4	4	2	2	1	3	3	4	1	4	2	1	3	1	3	2	1	1	2	4	4	4	4	2	4	4	2	1	1	3	1
233	1	4	1	4	2	3	3	4	1	1	1	1	4	1	2	2	2	2	1	4	2	3	3	1	4	3	2	4	4	1	2	4	4	4	4	2	4	1	1	2	4	2	1	4	4	4	4	1	4
234	1	4	1	1	1	1	4	4	1	1	1	1	2	4	1	4	4	1	4	2	3	1	1	1	1	4	2	4	3	1	4	4	4	3	1	2	4	1	1	4	1	4	3	4	2	2	1	1	4
235	4	4	1	4	4	2	3	4	4	4	3	1	1	1	2	3	4	4	4	1	1	1	2	4	4	4	1	4	4	4	3	4	4	4	4	3	4	1	1	4	4	3	3	4	1	4	1	4	4
236	2	1	4	4	4	2	3	1	1	4	1	2	3	4	2	3	4	4	4	4	2	3	1	2	2	4	2	2	4	2	3	2	2	3	1	1	3	2	3	4	1	2	2	1	2	1	1	2	3
237	3	1	3	4	1	2	2	4	2	2	1	3	3	4	2	4	4	2	2	4	2	3	4	2	4	4	1	4	1	2	3	1	2	2	1	2	4	1	2	4	1	4	4	1	3	4	1	2	3
238	3	1	4	4	1	2	3	4	4	1	4	3	1	1	1	1	1	4	3	1	2	1	4	2	3	4	4	4	4	1	2	1	1	1	1	1	4	4	2	4	3	1	1	1	1	1	4	2	4
239	4	4	1	1	1	1	1	4	4	4	4	4	4	1	3	1	1	2	1	1	2	3	1	1	4	1	1	4	1	2	3	1	1	4	4	4	3	1	3	3	4	4	4	4	2	4	1	1	1
240	1	3	1	1	1	4	4	1	1	1	1	2	1	1	4	4	1	2	2	2	1	1	1	2	3	4	2	4	1	1	4	4	3	3	1	4	4	2	4	4	1	1	1	1	2	4	1	4	4
241	3	1	4	3	1	1	3	2	3	4	1	1	4	2	1	2	4	1	1	1	1	4	3	2	2	1	3	3	4	1	4	1	1	4	4	4	4	2	4	4	4	4	4	1	4	3	1	1	2
242	3	4	2	2	3	4	4	4	1	4	1	4	4	1	1	3	4	4	4	4	2	4	1	2	3	4	2	3	4	2	4	1	2	1	1	2	3	4	2	4	4	1	1	1	4	3	4	2	3
243	4	1	1	3	1	2	2	4	2	4	1	4	4	2	3	1	1	2	2	4	4	4	1	1	3	1	4	3	1	1	4	4	1	4	1	1	1	1	2	2	1	2	4	4	4	4	4	2	1
244	2	1	1	4	1	1	4	1	1	2	4	2	2	4	2	1	4	2	2	2	1	1	1	3	1	1	1	4	1	1	4	1	1	1	4	2	2	3	4	4	1	1	1	1	4	3	4	2	4
245	2	1	1	4	1	1	1	1	1	4	4	2	4	4	4	3	4	4	3	4	2	4	4	4	2	2	1	1	1	2	2	1	4	4	1	2	4	1	2	1	4	1	4	4	2	4	1	1	3
246	1	1	2	3	4	2	4	4	2	4	1	2	1	4	2	4	4	3	4	1	2	1	3	2	1	1	1	1	1	4	4	3	2	2	1	1	1	1	1	1	1	2	4	1	2	1	2	2	2
247	1	1	4	2	2	1	1	4	2	1	1	4	4	1	1	1	1	2	1	3	4	4	3	4	4	1	1	1	1	1	1	4	3	3	4	1	3	4	1	1	1	2	3	1	2	3	4	3	3
248	3	4	2	4	3	1	1	4	4	4	1	4	3	4	2	2	1	2	1	2	1	1	1	2	3	1	4	3	1	1	1	3	2	1	2	4	4	1	3	1	1	2	3	4	4	3	1	4	3
249	1	1	2	3	1	4	1	4	1	4	1	1	2	4	4	3	2	4	4	1	2	2	4	3	1	1	1	1	1	1	4	1	2	2	4	2	1	1	2	2	4	1	4	4	2	2	1	1	1
250	1	1	4	4	4	2	2	1	2	1	1	3	4	3	1	1	1	1	4	1	4	3	4	2	3	1	1	3	1	2	1	1	2	4	1	4	4	4	1	1	4	1	1	4	1	4	1	2	4
251	2	1	2	2	3	1	1	1	2	3	1	1	3	3	2	1	1	4	4	1	1	1	1	2	1	4	1	1	1	3	4	4	4	4	1	2	1	1	2	2	3	1	4	1	1	1	1	3	3
252	3	1	4	4	4	1	1	1	3	1	1	4	3	1	4	4	1	1	2	4	1	1	4	4	4	1	1	1	1	2	1	1	2	4	4	4	4	4	2	2	1	2	1	4	4	3	4	4	4
253	1	1	2	1	1	2	3	4	4	4	4	2	2	1	2	2	4	4	4	1	1	1	1	1	3	4	2	4	1	4	4	4	2	1	4	2	1	1	1	1	4	1	4	4	1	1	1	1	3
254	1	4	4	4	1	1	1	1	3	1	1	1	1	1	2	4	4	4	4	1	2	1	1	1	3	1	1	1	1	2	1	1	1	2	4	4	4	1	1	1	1	3	3	1	2	4	4	4	4
255	1	1	4	3	4	1	2	3	4	4	4	2	3	1	2	1	1	3	4	1	2	2	1	1	1	1	2	3	4	3	4	4	2	1	1	3	3	1	1	4	1	1	1	1	2	1	1	2	3
256	4	1	1	1	1	2	1	4	4	4	3	4	4	4	4	3	1	1	1	4	4	4	2	4	4	4	1	1	2	3	3	1	1	4	4	1	1	1	2	1	4	2	1	4	2	2	1	2	3
257	3	4	1	1	1	1	3	3	1	1	4	1	4	2	2	1	4	2	1	2	4	4	1	1	1	1	3	1	1	4	3	1	1	3	1	3	1	1	3	2	4	2	4	4	2	2	1	1	3
258	1	2	4	4	1	2	2	1	1	1	4	2	3	4	4	4	3	1	1	3	3	1	1	4	4	1	1	1	1	2	1	1	2	3	1	2	3	1	1	1	1	3	3	4	4	4	4	1	4
259	1	1	3	1	2	1	4	1	1	1	1	2	1	4	4	3	4	4	4	1	1	3	1	4	3	4	1	3	4	3	4	2	2	2	1	2	1	4	1	4	1	2	2	2	2	2	1	2	2
260	2	4	2	4	1	2	3	1	1	3	4	4	3	4	1	4	1	2	4	4	4	4	1	2	4	4	1	4	1	1	3	4	4	3	4	2	4	4	1	4	4	1	1	4	2	3	1	1	4
261	4	1	1	1	4	2	3	4	2	4	1	2	3	1	2	2	4	2	3	4	1	4	1	1	1	1	2	2	4	2	4	1	1	4	4	2	1	4	1	4	1	1	4	1	1	1	1	2	2
262	4	3	1	4	1	2	2	4	2	2	2	1	4	1	1	4	4	1	2	4	2	2	4	2	1	4	2	2	4	2	1	1	1	1	1	1	4	1	1	1	1	3	1	1	2	2	1	4	4
263	4	3	1	1	1	2	2	1	1	4	4	2	2	2	2	1	1	2	4	1	2	4	3	1	1	1	4	3	1	4	4	2	4	2	2	2	1	1	2	2	4	1	4	1	1	1	1	2	2
264	3	1	3	3	1	3	4	4	1	1	1	2	3	1	2	4	4	2	4	1	1	1	4	4	4	4	1	4	4	2	1	4	1	1	4	2	2	1	4	4	4	4	3	1	2	1	1	1	1
265	4	1	1	1	1	3	1	1	4	2	2	4	2	2	4	3	4	2	1	4	4	4	1	1	1	1	1	3	4	1	1	4	2	4	1	2	2	3	3	1	1	1	1	1	1	4	1	1	2
266	2	4	4	4	4	2	4	1	1	2	3	1	1	4	2	2	4	4	4	4	3	1	1	3	1	1	1	1	1	2	4	4	3	1	1	3	1	1	2	4	4	2	2	1	1	4	2	4	2
267	4	4	1	1	1	2	4	1	1	1	4	4	4	1	4	3	4	2	2	3	1	1	1	1	4	1	1	2	4	2	2	1	4	4	4	2	4	1	1	2	4	3	4	4	2	4	1	2	1
268	1	1	1	2	4	1	1	1	2	4	2	2	1	4	4	3	1	1	4	4	1	1	1	4	3	1	2	3	1	4	2	2	2	1	4	1	2	4	4	4	1	1	2	1	1	1	1	1	1
269	1	1	1	4	1	1	3	4	2	2	4	4	4	4	2	4	1	1	2	4	1	4	1	2	4	1	1	1	1	1	3	4	2	2	1	1	4	1	1	2	4	1	1	4	2	4	1	4	4
270	3	4	2	1	4	2	2	4	2	2	1	2	4	4	2	3	1	1	2	4	1	1	1	3	3	1	1	2	4	1	4	4	4	2	4	2	2	1	2	1	1	2	3	1	2	2	4	3	3
271	4	4	3	3	4	3	4	4	4	3	4	1	1	4	1	2	4	1	1	2	1	2	1	1	2	4	1	2	1	2	3	1	4	4	1	1	2	4	4	4	1	4	1	4	2	1	1	3	1
272	4	2	3	4	4	2	2	1	1	3	4	1	1	1	2	3	1	1	2	3	1	1	4	1	1	4	2	4	4	1	4	4	3	3	1	1	4	1	4	3	4	3	1	1	1	1	1	4	4
273	4	4	1	1	4	4	3	4	2	3	1	1	2	4	1	2	4	1	4	3	3	1	1	1	1	4	1	2	4	1	1	4	4	3	4	1	2	4	1	4	4	1	4	4	1	1	4	1	1
274	4	4	3	3	4	1	3	3	1	1	1	3	1	1	2	1	1	2	1	1	4	4	4	1	1	4	1	1	4	1	3	1	2	1	1	1	1	4	1	2	1	1	4	4	4	1	4	3	1
275	3	1	3	1	1	1	1	3	1	4	1	1	4	4	4	3	4	1	2	4	2	2	1	1	2	4	1	1	4	2	3	2	1	4	4	1	1	4	2	4	4	2	2	4	2	2	1	1	4
276	4	4	3	1	1	2	2	4	1	2	3	1	1	3	1	1	3	1	1	1	2	1	1	2	1	1	1	4	2	1	4	1	3	1	1	2	1	1	1	4	1	4	4	2	4	3	4	3	1
277	2	1	4	4	1	1	2	1	2	1	1	2	3	1	4	4	1	2	1	1	2	1	3	1	4	4	2	2	1	4	1	1	4	2	4	3	2	1	1	4	4	2	4	4	2	4	4	1	1
278	4	4	1	4	1	2	1	4	2	4	4	1	4	1	1	4	4	4	1	1	4	4	1	4	1	1	1	4	4	1	3	1	4	2	1	2	2	2	2	2	1	4	4	4	2	3	1	4	1
279	1	2	1	4	4	4	1	1	1	1	1	4	1	4	2	1	2	4	1	4	1	1	4	3	4	4	1	1	1	2	2	4	4	4	4	1	2	4	4	4	4	1	2	4	4	4	2	4	2
280	4	4	4	3	3	1	1	4	1	1	3	4	4	4	1	4	4	1	2	3	1	4	4	4	4	3	4	1	4	1	2	1	1	4	4	4	2	4	1	2	4	4	1	1	1	4	3	4	4
281	2	1	1	1	2	2	4	4	4	1	1	1	2	4	4	2	4	4	4	4	4	2	2	3	2	4	1	4	4	4	4	4	1	2	4	4	4	4	4	1	4	4	1	3	1	4	4	4	4
282	1	4	4	4	2	2	4	1	4	4	4	2	4	4	1	2	1	1	2	1	4	1	1	4	1	4	1	1	3	1	1	3	4	1	2	3	1	1	4	1	2	4	1	2	4	1	1	4	1
283	2	1	1	3	1	4	3	4	1	1	1	1	2	1	1	2	1	2	3	3	1	2	2	4	1	1	1	1	1	4	3	4	1	2	3	1	1	3	1	1	2	1	2	1	1	2	3	1	2
284	1	1	4	1	1	2	1	1	2	1	1	1	2	1	1	3	1	1	2	1	2	1	1	1	3	1	2	1	1	1	1	1	4	2	1	1	2	2	4	1	3	1	2	1	1	2	3	4	2
285	3	2	1	2	1	4	1	1	1	1	3	4	2	1	2	1	1	1	1	1	1	2	1	1	1	1	1	2	4	1	2	1	4	1	1	1	1	1	1	4	1	4	3	1	1	2	1	2	1
286	1	1	1	2	3	1	2	1	1	1	3	2	1	1	1	1	1	2	3	1	1	1	3	1	4	4	1	1	3	4	1	2	4	2	1	1	2	1	1	4	4	1	1	1	2	1	1	1	1
287	1	4	1	1	4	4	3	3	1	2	3	1	2	1	2	4	1	4	1	1	1	2	2	1	1	1	4	4	1	4	4	1	3	1	3	1	1	1	4	2	1	4	2	4	1	4	4	1	2
288	1	2	3	4	1	4	2	4	1	3	4	4	1	2	4	4	4	1	3	1	1	2	4	4	3	1	1	1	1	4	2	3	1	1	2	4	4	4	4	2	1	3	1	1	4	2	1	1	1
289	2	3	1	4	4	4	1	3	4	1	1	1	2	1	3	4	4	1	1	4	4	1	1	3	1	1	2	4	4	2	1	1	1	2	1	1	4	4	4	1	2	1	1	4	1	2	1	3	4
290	4	1	4	4	4	4	2	4	1	2	2	4	4	3	1	1	2	4	2	2	4	3	1	1	1	3	1	1	3	1	4	1	4	3	1	1	1	4	4	1	1	4	1	4	1	2	1	4	2
291	2	4	4	3	1	1	2	1	4	1	1	4	1	4	4	1	1	2	1	2	4	2	4	1	2	1	4	1	1	4	1	4	2	2	1	2	4	4	4	4	4	3	4	3	4	4	4	3	1
292	1	1	4	4	1	2	1	4	1	4	1	4	1	1	2	1	1	1	1	1	2	1	3	2	4	4	4	1	4	4	4	1	4	4	1	2	2	1	1	4	1	2	1	4	2	4	3	4	4
293	1	1	1	2	2	1	1	2	4	2	1	4	1	1	4	4	4	2	2	4	1	1	4	1	2	1	3	1	4	1	4	1	3	3	4	1	1	1	1	1	1	4	2	1	1	1	1	1	2
294	4	4	4	3	1	4	4	4	4	3	3	1	2	4	1	1	1	4	3	3	1	4	4	3	2	1	4	1	2	4	4	4	1	4	3	4	1	4	4	1	1	1	1	1	1	2	1	1	1
295	1	3	4	2	4	1	2	1	4	1	4	1	2	4	1	1	1	3	4	4	1	2	2	3	2	1	1	4	4	4	2	1	3	1	4	4	1	1	1	1	1	1	2	1	1	2	2	1	2
296	2	1	1	1	4	1	4	3	1	4	4	4	1	1	1	1	3	1	4	4	4	3	4	2	3	3	4	1	1	3	4	4	1	4	1	4	2	1	3	2	3	4	4	3	4	4	1	4	4
297	2	1	2	4	4	1	1	1	1	1	1	4	3	3	1	1	4	3	2	1	1	2	4	1	2	4	2	2	3	1	1	4	2	3	4	4	2	1	1	1	1	2	4	2	2	2	4	1	2
298	3	3	1	4	4	1	3	2	1	4	4	1	1	4	1	2	4	1	1	3	4	2	2	4	4	4	4	2	2	3	4	1	3	1	1	4	2	2	1	4	4	1	2	4	4	1	3	1	1
299	1	2	4	1	1	4	1	3	4	3	1	1	1	3	1	2	3	1	2	2	1	1	2	1	2	1	1	2	1	1	2	1	3	1	2	1	2	1	4	1	4	4	2	1	2	1	4	1	1
300	4	1	3	1	2	1	2	1	1	3	4	2	1	1	2	1	4	1	2	1	2	1	3	1	4	4	1	1	1	1	1	1	1	2	1	4	1	3	1	1	1	1	1	2	4	1	1	4	1
301	4	4	1	1	1	1	2	1	4	1	1	4	1	2	1	3	3	4	1	1	4	1	3	3	3	1	1	1	3	4	1	1	1	4	3	4	1	1	1	1	4	1	4	1	4	1	3	4	2
302	2	1	4	1	3	1	4	4	1	4	1	4	1	1	2	1	4	1	2	3	4	1	1	1	1	1	4	3	4	4	4	4	1	2	2	4	1	1	2	2	2	4	4	3	1	1	2	2	4
303	4	1	4	1	1	4	1	4	1	3	3	3	2	1	1	1	1	3	1	1	1	1	1	1	2	4	3	1	4	4	2	2	4	1	1	1	1	1	4	3	3	4	1	1	4	1	4	1	1
304	3	1	1	1	1	2	4	4	2	2	4	2	1	4	1	3	3	4	1	2	4	1	1	1	4	2	1	1	1	1	4	1	1	4	1	4	4	1	1	1	3	2	2	2	1	1	1	4	1
305	1	4	4	4	3	1	1	4	2	1	1	2	2	1	1	4	1	1	3	4	3	4	4	4	3	1	2	1	1	2	3	4	1	4	1	2	1	3	2	2	1	2	4	4	2	3	1	4	1
306	4	1	4	3	1	4	4	1	2	4	1	2	1	1	3	3	4	1	1	1	3	1	1	3	4	4	1	1	1	2	1	4	1	4	1	1	1	4	1	4	4	1	1	1	1	1	1	2	2
307	4	4	3	4	1	1	4	4	2	1	4	1	4	1	2	3	1	4	1	4	2	1	2	1	2	4	1	1	1	1	1	1	2	1	1	2	1	2	1	3	1	1	4	1	4	4	4	2	1
308	2	2	2	1	1	1	3	4	1	2	1	1	2	2	1	2	4	2	1	1	1	1	2	1	2	4	1	1	2	1	1	1	3	4	1	1	3	1	4	4	2	4	3	4	4	2	3	1	2
309	4	4	4	1	3	1	4	2	2	1	1	2	1	1	4	3	1	2	1	2	2	1	1	3	1	1	4	1	4	3	1	2	4	4	4	1	1	1	2	1	1	1	1	4	1	3	1	2	3
310	4	4	2	1	1	4	1	4	4	1	3	4	2	4	1	1	2	3	1	1	4	2	2	1	1	4	1	4	1	3	3	3	4	1	4	4	1	3	1	1	3	4	4	1	2	3	4	1	1
311	1	1	3	4	4	2	3	4	1	1	1	2	4	1	1	4	1	3	1	4	1	1	2	1	3	1	1	1	4	1	4	1	3	4	1	2	1	4	1	4	2	1	4	1	1	1	1	1	1
312	1	1	1	3	1	2	3	1	1	3	1	1	1	1	2	2	4	2	2	1	2	1	3	4	4	1	4	4	4	1	2	1	2	4	1	1	2	2	1	4	2	2	1	4	1	1	4	1	1
313	4	3	1	1	2	3	4	4	2	2	4	1	3	4	1	1	4	2	3	1	1	1	4	2	4	1	4	1	4	1	1	1	4	4	1	2	1	4	1	2	4	1	4	1	4	4	1	2	1
314	4	4	1	3	1	1	2	4	1	2	4	4	4	4	1	1	4	2	1	4	2	3	1	2	4	1	1	3	1	1	2	4	2	4	1	1	1	1	2	4	4	4	4	1	2	2	4	1	1
315	1	1	1	1	4	1	3	1	1	1	1	2	3	2	3	3	4	1	4	1	1	4	4	2	2	2	1	3	1	4	1	4	1	1	1	1	1	1	2	1	4	2	3	4	2	1	4	1	1
316	4	1	3	1	1	1	1	2	1	4	4	1	1	1	3	1	1	2	1	4	2	1	1	1	1	2	1	4	1	1	1	1	1	1	4	2	3	4	1	1	1	2	1	1	2	3	4	1	1
317	1	1	2	3	1	1	4	2	4	4	3	1	1	4	1	2	4	2	2	1	2	1	2	2	1	1	1	3	1	1	4	1	1	2	4	2	4	1	2	1	4	4	2	4	2	3	1	2	4
318	2	1	1	4	1	1	2	1	2	3	1	2	2	4	2	1	3	1	1	1	2	4	1	1	2	4	4	4	1	1	1	1	1	2	4	1	1	1	2	1	1	4	1	4	4	1	4	2	4
319	3	4	3	1	4	1	3	1	3	4	1	2	1	4	4	3	4	1	2	1	3	3	2	1	1	1	1	4	2	1	1	2	3	4	2	1	1	4	1	4	1	2	2	2	4	3	4	4	4
320	2	2	1	2	2	1	1	1	4	4	4	4	1	4	1	1	4	1	1	4	2	1	3	4	2	1	4	2	3	4	1	2	1	4	4	4	1	1	4	2	2	1	1	4	4	2	3	4	1
321	2	1	1	1	1	4	1	4	2	1	1	4	1	1	1	1	2	4	2	4	1	2	3	1	1	1	4	2	2	3	1	3	4	4	4	4	2	2	1	1	4	2	2	2	4	4	2	4	2
322	1	4	1	1	3	1	2	3	1	1	1	4	2	2	1	4	4	1	1	1	1	2	4	1	1	1	4	2	2	3	4	1	4	1	1	1	2	1	4	2	1	1	1	4	1	3	1	2	2
323	4	4	1	2	1	2	1	1	4	4	4	1	1	3	1	4	4	1	1	1	1	2	1	1	2	1	4	4	1	4	4	4	4	1	3	4	4	4	4	4	3	1	2	1	4	2	1	1	2
324	2	1	1	4	1	4	1	2	1	3	1	4	1	1	2	3	1	4	1	1	1	1	4	1	2	1	1	1	3	4	3	3	1	1	1	2	2	1	1	4	4	2	1	1	2	3	3	1	3
325	2	1	4	1	1	4	2	4	2	3	4	1	2	4	1	2	3	4	2	4	4	1	4	2	2	2	1	2	3	4	2	1	1	4	4	4	2	4	1	2	4	1	1	4	4	2	2	2	1
326	2	3	3	1	1	1	3	3	4	1	4	4	4	3	3	4	3	1	1	1	2	4	2	1	1	1	3	4	4	4	4	2	1	1	1	3	4	2	4	1	2	1	1	4	4	1	1	1	1
327	1	1	1	4	2	1	1	4	4	2	2	1	3	3	4	1	1	1	2	2	2	4	4	3	4	4	4	4	4	4	1	4	4	4	2	1	4	4	4	4	2	1	1	1	1	1	2	2	4
328	1	1	1	3	2	3	1	2	1	4	2	2	1	1	3	1	3	4	1	1	1	1	1	1	1	4	2	4	2	1	4	1	1	2	2	4	2	3	1	2	2	3	2	4	1	3	1	1	1
329	1	1	1	2	2	3	4	1	4	1	4	4	1	1	3	1	3	3	4	1	2	1	4	1	3	1	1	1	1	1	1	2	3	1	2	3	4	4	1	4	1	3	1	1	1	3	1	4	4
330	1	1	4	1	1	1	1	2	1	3	4	4	1	1	4	1	2	3	4	1	2	4	1	1	3	4	4	1	4	3	4	3	1	1	1	2	4	2	3	1	1	1	1	2	1	2	3	4	4
331	1	4	4	1	1	4	1	1	1	1	2	1	1	1	3	4	1	4	4	4	4	2	2	4	4	3	1	4	3	3	1	4	1	4	1	3	1	1	1	1	2	1	1	2	4	4	1	2	4
332	4	2	4	4	4	2	2	3	4	4	2	1	1	1	1	4	1	2	4	1	2	1	3	4	4	2	4	4	1	1	4	4	1	4	2	1	1	4	4	4	2	1	4	2	4	2	4	4	1
333	4	2	1	1	1	1	4	1	4	1	1	3	3	1	4	1	2	1	4	2	2	1	1	1	3	1	4	1	1	1	1	1	2	2	4	1	2	2	4	2	1	4	4	1	4	1	4	2	2
334	3	3	4	1	4	1	3	3	1	4	4	1	4	4	4	4	4	1	1	3	1	2	1	1	2	1	2	2	1	2	2	1	3	4	3	4	2	4	1	3	1	4	2	1	1	1	2	2	1
335	4	4	4	3	1	1	2	1	4	2	4	2	1	2	3	1	3	1	3	4	1	2	1	1	2	2	2	2	1	3	4	4	4	1	4	4	4	1	4	2	1	4	2	3	1	1	3	1	1
336	2	1	2	3	1	2	1	4	1	2	3	4	2	1	1	4	4	1	1	1	1	3	1	1	3	4	1	2	2	1	4	4	1	3	1	1	1	1	4	1	1	4	4	4	1	1	2	2	1
337	3	1	1	1	3	4	1	2	3	4	1	4	2	2	1	2	1	1	4	1	4	3	4	1	2	1	1	4	2	2	4	4	2	2	2	1	2	1	1	4	2	3	1	1	1	2	2	1	2
338	3	1	1	3	3	1	1	3	4	1	1	1	4	3	2	2	4	4	2	2	4	1	4	2	2	4	4	1	3	1	4	4	4	1	1	4	2	2	4	2	3	4	3	1	1	2	2	1	1
339	1	1	1	2	2	1	1	3	4	1	4	4	2	4	4	1	3	1	1	3	4	1	4	1	2	3	4	1	3	1	2	1	4	2	1	1	1	1	1	3	1	2	1	2	3	1	4	1	2
340	3	4	4	2	1	1	1	3	4	1	1	1	1	3	4	1	4	1	2	2	1	2	3	1	1	1	4	2	1	1	1	3	1	2	4	1	2	1	4	1	4	4	1	1	1	2	3	1	2
341	2	3	1	2	2	1	1	3	4	1	4	1	2	2	1	1	1	4	2	4	1	4	3	4	1	1	4	1	1	3	1	3	4	1	4	1	1	3	4	2	4	4	4	4	1	3	4	1	2
342	2	2	4	2	4	4	1	1	1	4	3	1	2	4	4	4	3	4	1	1	4	1	1	1	2	1	1	2	1	4	4	4	3	1	2	1	2	2	4	2	2	1	1	3	1	2	1	4	1
343	2	1	1	3	1	4	4	4	4	1	2	1	2	1	1	1	2	1	2	4	4	3	4	4	2	4	1	2	3	1	2	1	2	3	1	1	2	1	2	2	1	3	1	1	1	4	4	1	1
344	4	3	1	2	1	3	4	1	4	1	4	1	1	2	1	4	2	2	2	3	4	1	1	1	2	1	1	2	4	1	2	1	4	2	2	1	2	4	2	2	2	1	4	1	4	2	3	4	4
345	2	1	1	4	2	2	1	1	4	2	2	1	2	3	1	2	2	2	1	3	1	2	4	1	1	1	1	2	4	1	4	4	1	1	4	1	3	4	1	2	1	4	1	1	1	1	1	3	1
346	1	3	1	3	1	1	2	1	1	4	4	1	1	4	1	2	1	4	1	1	2	2	4	3	3	1	1	2	1	1	4	1	4	1	4	1	4	1	4	3	3	1	4	4	2	1	1	4	1
347	2	1	1	1	1	4	1	2	1	2	1	4	2	2	2	1	1	1	2	3	4	3	3	4	1	4	3	2	2	4	2	3	1	4	4	1	2	4	4	1	3	1	2	4	4	2	4	2	1
348	4	4	1	3	4	4	1	4	4	1	1	4	2	4	1	1	1	1	2	3	4	1	2	4	4	4	4	1	4	1	4	4	4	1	2	4	1	1	4	2	2	3	4	4	4	1	2	4	2
349	4	4	1	1	1	3	1	1	4	3	4	1	1	1	1	1	3	4	1	1	2	1	4	1	2	1	4	1	1	1	4	1	4	4	4	1	2	1	4	1	1	2	1	4	4	2	1	4	4
350	2	4	3	4	3	1	4	1	3	1	1	4	2	3	4	1	4	1	3	1	2	2	3	2	1	4	1	2	4	1	2	2	3	4	3	4	1	4	2	1	4	2	3	4	2	1	3	1	2
351	2	1	1	2	1	3	4	4	4	4	3	4	1	1	4	3	4	4	1	3	4	1	4	1	1	1	4	2	1	4	2	4	1	1	1	1	2	1	1	1	1	4	1	4	1	1	1	1	4
352	2	4	2	2	4	3	2	2	1	1	4	1	2	2	2	2	1	1	1	4	1	2	4	4	1	1	3	2	1	2	2	4	2	2	4	4	2	2	1	4	2	1	4	1	2	3	4	4	3
353	1	1	2	1	1	1	4	2	3	4	4	3	4	4	1	3	1	4	4	1	4	3	4	3	3	4	1	4	3	4	1	4	2	1	1	3	1	1	4	3	4	1	4	3	1	4	1	1	4
354	1	4	2	1	1	2	3	4	1	4	1	2	2	1	1	2	3	2	1	1	4	4	4	2	1	4	1	1	4	3	4	1	2	1	1	4	4	1	4	4	1	1	1	4	1	1	1	2	1
355	1	1	4	4	1	4	4	3	3	3	4	3	1	2	1	2	4	2	3	2	1	3	1	4	2	2	2	2	1	3	4	4	2	1	1	4	4	4	4	2	2	2	1	1	1	1	4	1	2
356	3	3	1	3	4	1	1	4	1	4	1	2	1	4	2	1	1	2	1	4	1	4	1	2	1	1	2	3	4	1	2	1	1	2	1	1	2	1	1	1	2	2	4	3	1	4	4	2	3
357	2	4	1	1	1	4	1	4	1	4	4	1	4	2	1	3	1	3	3	4	1	1	1	1	2	1	1	4	2	2	3	4	1	4	2	1	4	1	3	4	3	3	1	1	4	3	4	4	1
358	1	3	1	4	1	1	1	1	1	4	1	1	1	4	2	1	1	1	1	4	1	4	1	4	3	4	3	3	1	4	1	4	1	3	4	4	4	4	2	2	4	2	4	4	2	1	1	4	4
359	1	1	2	2	4	4	4	4	3	3	4	1	1	1	2	1	4	4	4	1	2	1	1	2	1	4	4	4	1	4	1	4	1	1	2	1	2	1	2	4	1	1	1	4	2	4	4	1	4
360	1	4	4	4	1	2	3	4	2	4	1	1	2	4	4	1	4	1	1	2	4	4	1	2	4	4	4	3	4	4	4	1	4	4	2	1	1	1	1	2	4	1	1	1	1	3	3	4	1
361	3	2	2	3	1	1	4	4	1	4	2	1	2	3	2	1	1	2	1	1	1	4	1	1	3	4	2	4	1	4	1	4	3	3	2	4	1	3	1	3	1	1	2	3	1	1	1	2	1
362	2	4	2	4	4	1	1	1	2	3	3	1	1	2	4	4	4	2	3	1	3	4	1	2	3	4	3	1	4	1	1	3	1	4	2	1	2	3	4	3	1	2	1	1	1	3	1	4	4
363	3	1	1	2	1	4	1	2	2	1	2	2	4	2	2	3	1	4	1	1	1	4	2	2	3	4	2	1	4	2	1	1	3	1	1	4	4	4	4	1	3	1	3	1	1	4	1	3	4
364	2	4	1	1	1	2	3	4	1	1	2	1	4	4	2	3	4	1	1	4	2	3	1	2	2	1	1	4	2	4	4	1	2	2	4	1	1	2	4	3	1	2	4	1	1	4	4	4	4
365	1	1	2	3	1	2	2	4	2	1	4	2	2	4	2	2	1	2	2	1	1	1	3	4	1	3	4	1	4	1	1	4	3	3	1	1	3	1	2	1	1	2	1	3	3	1	1	1	3
366	1	4	1	1	1	2	4	4	4	2	2	2	1	1	2	2	2	1	1	4	1	4	1	1	1	4	2	3	4	4	4	4	2	1	4	1	1	4	2	1	4	2	1	1	1	1	4	1	1
367	4	4	1	4	4	2	3	1	1	3	1	2	3	1	4	2	4	1	4	3	3	3	4	2	2	4	4	3	2	1	4	1	2	2	4	2	2	1	4	4	4	1	3	1	2	4	4	1	2
368	4	4	1	4	1	2	1	4	1	1	4	2	1	1	2	2	1	2	1	4	1	4	2	1	4	4	2	3	1	2	4	4	4	2	4	1	1	1	1	2	3	3	3	4	2	1	1	1	3
369	1	1	2	4	4	2	1	4	1	1	4	2	2	1	2	3	4	1	4	2	1	1	1	2	1	4	4	4	2	4	1	4	4	4	2	1	1	1	4	4	4	1	4	3	1	4	1	2	1
370	4	1	2	1	2	1	1	1	2	4	2	1	3	1	4	4	1	2	4	4	2	4	4	2	1	3	3	3	4	1	3	1	2	3	4	1	4	4	4	4	4	3	4	1	1	3	4	1	1
371	1	1	1	1	1	1	4	1	4	4	1	1	3	1	1	1	4	1	4	4	1	1	4	1	1	1	3	4	1	2	1	3	1	3	4	1	1	1	1	4	1	2	1	4	1	3	1	1	3
372	4	1	1	3	1	1	2	3	1	1	3	1	4	1	2	1	1	1	3	4	1	3	4	1	1	1	1	3	1	2	1	2	3	4	1	1	1	3	1	3	4	1	2	1	1	4	4	2	1
373	1	2	1	1	1	3	1	1	1	1	4	1	4	4	1	1	1	1	4	4	2	1	3	3	1	1	4	4	1	1	4	3	2	3	1	2	2	4	2	2	4	4	3	1	1	1	4	2	4
374	1	1	1	4	1	1	4	1	1	3	1	1	4	4	2	1	4	2	1	4	4	2	2	2	4	4	2	1	2	2	1	4	2	3	1	2	1	1	1	1	4	2	2	1	4	4	3	1	1
375	3	1	3	1	4	1	2	4	4	4	1	4	4	1	1	3	1	3	1	2	1	2	1	1	4	1	2	4	4	2	4	1	1	1	4	1	4	4	1	4	1	2	1	4	2	3	4	1	3
376	1	4	2	3	1	2	4	4	1	3	1	1	1	3	4	4	4	1	1	1	1	4	4	1	4	1	2	1	4	2	1	4	1	1	4	4	3	4	1	4	1	2	1	1	2	4	4	1	2
377	2	2	4	3	1	2	1	1	4	4	1	1	1	3	2	4	4	4	1	4	2	4	2	1	4	1	1	1	4	2	2	1	1	1	4	2	3	1	2	1	1	1	3	4	3	1	4	4	4
378	3	4	2	4	1	2	1	4	2	1	4	1	1	3	1	2	1	2	4	2	4	3	4	2	1	1	1	4	2	1	3	4	1	3	4	4	1	4	4	3	1	4	3	4	1	1	2	1	1
379	3	4	1	4	4	1	2	3	1	2	4	1	4	1	3	1	2	3	4	4	1	4	1	2	1	4	1	3	3	1	2	4	1	4	1	1	2	4	1	4	4	1	3	1	2	1	4	2	3
380	4	4	1	3	1	1	2	4	2	1	4	1	1	2	4	4	1	2	1	4	2	2	1	2	4	1	4	4	1	2	1	2	2	1	1	1	4	1	1	4	2	2	4	1	2	1	1	1	4
381	2	1	1	3	4	1	1	1	2	2	1	1	4	1	1	3	4	1	4	1	2	4	2	1	1	4	1	1	4	4	4	1	1	4	1	2	1	4	1	4	2	1	4	1	4	1	1	2	3
382	1	4	2	1	3	1	2	1	1	1	1	1	4	4	1	1	3	4	2	1	1	1	1	4	2	3	4	1	2	4	4	4	1	2	2	2	2	1	1	3	4	4	1	4	2	2	3	1	2
383	2	4	1	3	1	1	1	3	4	2	1	4	4	4	4	3	1	1	1	3	4	2	2	4	1	1	1	1	1	4	1	1	4	1	4	1	4	3	4	1	2	4	2	3	1	4	4	2	2
384	1	4	4	2	2	1	1	3	1	2	1	4	1	1	1	4	4	4	2	2	4	1	3	1	1	3	4	1	1	1	1	3	1	1	1	1	1	4	1	2	1	1	1	3	1	4	4	1	1
385	2	4	2	2	1	2	1	3	2	1	4	4	1	1	4	4	3	4	1	1	1	1	1	4	2	4	4	4	3	1	2	3	1	1	3	1	4	3	1	4	3	4	2	1	1	1	3	1	4
386	1	4	4	2	1	1	1	1	1	2	4	4	1	1	3	4	2	2	1	4	4	4	4	4	3	1	1	4	3	1	1	4	1	2	1	1	1	4	4	4	4	4	4	3	4	4	4	1	1
387	3	1	1	2	3	4	1	3	1	1	3	4	4	4	1	1	1	3	1	3	4	3	3	4	1	2	3	1	4	3	2	4	4	4	1	3	1	1	4	2	1	1	2	4	1	4	3	4	1
388	1	3	1	4	4	1	1	2	1	4	4	3	1	3	1	2	2	3	2	1	1	3	4	4	1	1	1	2	3	2	4	3	4	1	1	1	1	4	2	3	2	4	2	3	4	2	1	4	4
389	1	1	1	1	4	1	2	1	2	1	4	1	3	4	1	4	2	4	2	2	1	1	1	3	3	2	1	1	1	1	2	1	1	4	1	3	4	4	4	4	1	4	2	4	4	1	3	4	2
390	1	2	4	2	3	1	4	3	4	4	3	4	4	3	4	4	4	4	2	4	1	1	2	1	4	4	4	1	3	1	1	1	1	2	1	4	1	4	4	1	4	4	2	4	4	2	1	2	1
391	1	4	1	1	1	1	2	4	1	3	1	1	1	4	1	4	4	1	4	4	1	1	3	1	4	3	4	2	4	1	2	2	1	2	3	1	2	2	1	1	1	4	4	4	1	2	1	4	2
392	2	3	4	3	2	4	2	3	1	2	1	1	1	4	1	2	1	1	1	1	1	4	4	1	1	3	1	1	4	1	4	4	1	1	2	2	4	1	2	2	1	1	4	1	1	1	4	4	1
393	2	4	1	4	1	4	4	1	4	1	1	4	4	3	4	4	4	1	2	1	4	2	1	1	1	1	1	2	1	1	1	1	1	1	4	1	1	4	4	1	2	4	2	1	1	1	1	3	4
394	2	4	4	1	4	1	2	1	1	1	4	1	4	1	4	2	1	1	1	3	4	4	4	1	1	1	4	2	1	1	1	1	4	4	1	4	4	4	1	2	4	2	4	4	1	4	3	1	1
395	3	1	1	2	1	4	2	1	1	1	1	1	3	4	4	1	2	4	4	1	4	2	1	1	2	1	1	4	4	1	2	1	1	1	1	4	2	1	1	4	4	1	4	4	1	1	4	4	1
396	4	4	1	3	1	1	2	2	1	2	2	1	4	4	2	4	4	1	4	1	1	4	2	1	1	4	1	4	1	1	1	4	1	1	4	2	4	4	2	4	2	2	4	1	1	2	1	1	4
397	2	1	1	4	1	4	4	1	1	1	4	2	2	1	2	2	2	4	4	1	1	1	3	3	3	4	4	4	2	1	1	1	1	1	4	1	2	1	2	1	2	4	4	4	3	1	1	3	4
398	3	4	1	1	3	1	3	1	2	1	1	4	1	3	1	2	1	1	1	1	2	3	1	2	4	1	2	1	2	2	1	4	4	1	4	1	4	4	1	4	1	1	1	1	1	1	4	1	2
399	1	1	2	2	1	1	4	1	2	1	1	3	3	1	1	3	1	2	3	2	4	1	2	4	1	2	2	4	4	3	4	4	4	4	4	4	4	1	4	4	2	1	1	1	2	1	1	2	2
400	3	4	4	4	4	1	1	1	2	1	2	4	4	1	2	4	4	1	1	4	1	1	1	2	4	4	1	2	1	1	1	4	3	4	4	2	4	1	4	4	1	2	1	1	2	3	1	1	1
401	4	1	2	1	1	2	1	4	1	3	1	2	1	2	1	1	4	1	1	3	4	4	4	1	3	1	1	2	4	2	1	4	1	1	4	2	4	1	2	1	1	2	2	1	2	3	1	4	4
402	4	4	3	1	1	1	1	4	2	2	1	2	4	4	1	1	4	2	3	4	1	1	1	1	1	4	1	1	4	2	4	1	2	4	1	1	3	1	2	3	1	4	4	1	1	1	3	4	3
403	1	2	2	4	4	1	3	4	1	3	1	1	2	3	2	1	4	1	3	1	4	2	2	2	1	1	2	1	1	1	4	1	1	1	2	1	1	4	1	1	1	1	4	4	2	1	4	1	4
404	2	1	4	4	1	2	1	4	4	4	1	1	2	1	2	1	1	1	3	1	1	4	1	3	4	4	2	3	1	1	1	4	1	2	4	4	1	4	4	3	4	4	3	1	4	1	4	4	4
405	2	4	2	3	4	1	4	1	1	1	1	4	1	4	1	4	4	2	1	1	1	1	1	4	1	4	1	2	4	2	2	2	1	2	4	4	4	1	1	1	1	2	3	1	4	4	1	2	1
406	3	3	4	1	4	4	4	4	4	1	4	2	3	1	1	4	4	1	1	1	2	2	4	1	3	1	3	1	4	4	4	1	1	4	4	1	1	1	1	4	4	1	1	4	2	3	1	1	4
407	4	1	1	4	4	4	4	4	2	1	4	1	4	4	1	3	4	4	4	1	2	3	3	1	1	4	2	3	4	1	1	3	4	4	3	4	3	1	4	2	4	1	4	3	4	2	4	2	4
408	1	4	4	4	1	4	4	4	1	4	1	4	3	4	2	1	3	1	1	4	1	3	4	1	1	1	4	4	1	4	1	4	1	1	1	1	4	1	1	1	4	1	1	2	4	4	1	1	3
409	3	1	3	1	2	4	3	1	1	4	1	2	1	1	2	2	4	4	3	4	4	1	4	4	1	4	1	1	2	3	4	1	4	2	4	1	3	4	4	1	4	2	2	2	2	1	1	4	4
410	4	1	4	1	4	2	2	1	2	1	4	2	1	2	1	3	4	4	3	4	4	3	1	1	4	1	3	4	4	3	1	3	1	1	1	1	4	1	1	2	1	1	4	1	4	3	2	2	1
411	4	2	3	4	1	1	3	4	1	1	1	2	1	4	1	4	2	4	3	3	4	3	4	2	1	4	1	2	1	1	4	4	4	1	4	2	1	3	4	4	4	2	1	1	1	2	1	2	2
412	2	4	1	1	4	1	1	4	1	1	4	2	2	4	1	4	4	4	1	4	2	3	4	1	3	1	1	3	1	2	1	1	3	1	3	4	3	1	1	1	4	4	3	1	1	2	4	2	2
413	2	4	4	1	3	3	4	1	1	3	4	1	1	1	1	4	1	1	1	4	4	4	4	2	1	4	4	4	4	1	2	4	2	4	4	2	3	2	1	1	1	1	2	4	4	4	4	1	2
414	1	4	4	4	1	4	1	4	2	1	1	1	1	1	1	1	3	1	4	4	1	1	2	4	4	4	4	4	1	1	1	4	2	1	4	4	4	4	2	4	4	4	4	4	2	4	1	4	3
415	2	1	1	2	3	1	4	1	2	1	1	2	4	4	2	1	2	1	2	4	2	2	4	1	1	1	1	1	1	1	2	4	2	2	1	4	4	1	2	3	1	1	1	1	4	1	4	2	1
416	1	4	4	4	2	1	4	4	1	3	4	4	1	4	2	2	4	2	2	2	4	3	1	2	1	4	1	2	1	4	1	4	2	1	1	1	1	4	4	4	4	2	1	1	1	4	1	4	1
417	4	1	4	1	4	1	3	1	4	4	4	1	1	4	4	3	1	3	4	4	4	3	4	1	2	4	1	2	3	3	3	1	4	4	4	1	4	1	1	1	1	1	4	1	1	1	4	4	4
418	1	1	2	1	1	2	4	4	1	1	4	1	2	3	4	1	3	3	2	1	1	3	2	3	4	3	1	4	4	1	1	3	1	3	1	1	1	4	3	3	4	3	1	1	1	1	1	2	2
419	4	1	1	1	3	1	1	4	1	4	1	1	4	4	4	4	4	4	4	4	1	4	4	2	2	4	2	2	4	2	2	3	1	4	4	3	1	3	1	2	1	1	1	4	1	4	1	4	4
420	4	4	4	1	4	4	3	1	2	1	4	2	1	1	1	1	1	2	2	1	2	1	2	2	1	1	4	4	1	4	2	1	4	4	4	1	4	4	4	1	2	2	1	1	1	4	4	4	4
421	4	2	1	1	3	1	1	1	1	4	1	4	1	1	1	1	4	1	4	1	4	4	2	2	2	1	4	2	1	4	1	3	1	3	4	1	4	1	1	1	3	3	1	1	3	4	4	4	1
422	1	2	1	2	4	4	1	1	1	1	1	1	4	2	2	1	1	4	4	4	4	1	1	4	4	2	1	2	1	1	1	4	4	2	3	3	1	2	4	1	3	1	1	3	1	1	4	1	4
423	1	2	1	1	2	3	1	1	1	2	4	4	1	4	4	4	1	4	1	1	1	4	1	4	1	2	1	4	1	3	4	1	1	1	2	1	2	2	4	4	4	4	3	4	1	4	1	2	1
424	4	1	1	1	1	2	4	1	2	3	1	4	1	2	1	1	2	1	4	1	1	1	2	4	1	1	1	4	4	3	4	1	3	1	2	1	1	3	1	1	1	3	1	1	4	1	2	3	1
425	4	3	1	1	4	4	1	1	4	2	4	3	1	1	1	4	2	2	2	2	4	2	1	4	1	4	1	1	1	4	2	1	1	4	4	2	2	4	1	3	1	1	2	1	4	1	1	4	1
426	4	1	1	4	1	1	4	2	2	4	1	1	4	4	2	2	1	3	4	1	1	1	2	1	2	3	1	1	2	4	4	1	1	1	1	3	2	2	3	1	2	4	1	2	1	1	1	1	2
427	2	2	3	1	1	3	1	2	1	1	4	1	4	1	1	1	2	1	1	1	4	4	2	4	1	2	2	1	2	1	2	2	1	3	4	1	4	1	4	1	2	3	1	4	1	2	4	3	4
428	4	1	1	1	1	4	1	4	1	4	1	1	1	4	4	3	1	4	4	4	1	3	1	4	4	4	4	2	3	3	4	1	3	1	3	4	4	3	1	4	3	4	1	3	1	3	4	4	4
429	4	1	2	4	4	4	4	1	1	1	1	4	4	1	2	2	4	1	3	1	1	4	1	1	1	1	3	3	1	4	1	1	1	4	4	1	1	2	1	1	1	2	1	2	2	4	2	2	1
430	3	1	2	4	4	4	1	4	2	1	1	4	4	4	1	1	4	4	1	4	1	3	2	2	2	1	1	2	4	2	1	1	3	1	1	1	2	4	2	4	4	1	3	1	4	4	2	1	1
431	1	3	1	1	1	4	4	4	2	1	1	4	2	4	4	2	2	2	2	4	2	3	4	1	2	2	2	2	4	2	2	4	2	3	1	4	4	1	2	2	1	1	3	4	3	3	4	4	4
432	4	4	4	1	4	4	1	4	2	2	4	4	1	4	2	2	4	2	2	1	4	1	4	4	2	4	1	2	4	2	2	4	2	1	1	1	4	1	1	3	1	4	4	1	1	1	1	1	1
433	4	1	4	1	4	3	4	4	4	1	4	2	4	4	2	2	1	1	4	1	2	1	4	2	2	4	1	2	1	1	1	1	2	2	4	4	1	4	1	1	4	4	4	3	1	1	4	1	2
434	2	4	1	1	4	2	2	4	2	3	1	1	2	4	2	2	4	2	2	4	2	2	4	2	3	4	1	3	3	2	1	4	1	4	4	1	2	2	3	4	4	1	4	4	2	2	4	2	2
435	1	4	2	1	1	3	1	1	2	2	4	4	4	1	3	4	1	4	3	4	3	2	4	1	4	1	1	4	4	2	4	4	2	3	1	2	2	4	2	2	4	2	2	3	2	2	4	2	2
436	1	1	3	1	1	3	1	4	2	2	4	2	2	4	2	1	4	2	2	4	2	2	4	2	2	3	4	4	2	1	1	1	2	2	2	1	3	4	3	4	4	2	2	1	1	3	4	4	3
437	3	4	2	3	4	2	3	4	3	1	4	2	2	4	2	2	4	1	3	1	3	1	1	4	4	4	2	1	2	2	2	4	2	2	2	3	2	1	2	2	4	1	2	1	2	1	3	1	1
438	2	4	2	1	4	2	2	4	4	4	4	4	4	4	2	2	4	1	1	1	2	2	4	2	3	4	1	3	4	3	3	4	1	1	1	1	1	3	3	3	4	4	3	1	4	3	1	3	1
439	2	3	2	2	4	2	2	4	4	2	2	4	4	4	2	2	4	2	2	4	2	3	4	4	1	4	3	3	4	2	3	4	1	2	4	2	2	1	4	4	4	2	2	4	1	1	4	2	2
440	2	1	1	2	4	2	2	4	4	1	4	2	4	1	3	4	1	1	3	4	1	1	1	2	1	4	1	2	4	4	1	4	1	1	2	3	3	1	3	3	4	2	2	1	4	1	4	1	3
441	1	1	4	1	4	4	1	4	4	4	4	2	1	4	1	1	4	2	4	1	2	4	3	1	4	2	1	3	1	1	3	4	2	2	4	2	2	1	1	1	4	1	3	4	1	3	4	2	4
442	1	3	4	3	1	2	1	4	2	2	4	3	2	4	2	3	4	1	1	1	1	4	1	1	3	1	4	4	1	4	4	1	3	1	1	2	3	1	4	4	1	3	3	1	4	4	4	4	4
443	3	1	4	1	3	1	1	3	4	3	1	1	3	4	1	3	1	2	3	1	1	3	1	4	4	3	1	1	1	2	3	1	2	1	3	3	1	3	1	3	1	2	1	3	3	3	4	1	3
444	1	1	1	4	1	2	1	1	1	4	1	4	4	4	1	4	1	2	1	4	2	1	4	1	4	1	4	4	1	1	1	1	2	1	1	1	3	4	1	4	4	1	3	1	1	3	1	2	1
445	1	1	1	1	1	1	3	1	1	4	4	1	1	3	4	1	3	1	3	1	4	4	1	2	1	1	2	1	4	1	1	4	2	3	1	3	4	1	3	1	3	1	3	4	3	4	4	1	1
446	3	1	2	1	3	1	2	4	1	3	4	1	1	4	2	3	4	1	3	1	2	3	1	2	1	1	1	1	1	1	4	1	2	4	1	1	2	4	3	4	1	1	2	4	1	1	2	1	1
447	4	1	2	2	4	2	1	4	2	1	4	2	3	3	1	2	4	3	4	1	3	1	1	2	1	4	1	4	1	2	3	1	1	2	4	1	1	1	2	4	4	1	2	4	2	1	1	1	4
448	4	1	1	4	1	1	1	4	2	2	3	1	1	1	1	3	4	4	3	4	1	4	3	1	4	1	1	1	4	2	4	1	4	4	1	2	3	1	4	4	1	1	1	2	1	1	4	1	4
449	4	2	1	1	3	1	1	4	4	3	4	4	4	1	2	4	1	2	1	1	4	4	2	4	3	1	2	1	2	1	1	2	2	4	1	1	1	1	2	1	1	4	3	3	4	4	4	2	1
450	3	4	1	2	4	4	4	2	3	1	2	2	1	4	4	4	1	1	4	1	1	1	3	3	1	2	4	4	1	1	3	1	3	1	2	2	3	4	1	1	4	1	1	4	1	3	4	1	4
451	1	3	4	3	4	1	1	1	4	1	4	1	1	1	4	1	4	4	3	4	1	2	4	2	2	1	1	3	4	4	4	4	1	3	4	4	1	4	4	1	4	1	3	4	2	2	4	2	3
452	2	2	3	4	1	1	1	4	1	4	1	2	2	4	4	4	4	1	2	2	3	3	1	2	1	4	1	4	4	1	4	4	4	3	1	4	1	3	1	3	4	2	4	4	1	4	3	1	1
453	1	1	1	1	1	4	1	4	4	1	4	4	2	4	2	4	1	4	1	3	1	3	1	3	3	4	4	4	1	4	4	3	4	1	4	3	4	4	4	4	4	4	1	4	1	1	4	4	1
454	1	1	1	1	1	4	1	4	3	4	4	2	1	4	2	4	4	1	1	4	3	1	4	1	1	4	3	1	4	4	1	4	2	2	1	1	4	1	1	3	4	4	4	4	1	3	4	2	1
455	4	1	3	3	4	1	1	1	2	2	4	3	3	1	2	4	4	1	1	3	1	1	4	2	2	4	2	4	2	4	1	4	1	2	4	4	1	4	1	4	1	2	3	1	2	4	4	1	1
456	4	1	4	3	1	1	1	2	2	3	4	4	1	2	1	4	1	1	3	4	4	3	4	1	1	2	3	3	4	4	1	4	4	4	4	1	1	4	1	4	1	1	1	4	1	1	2	2	1
457	1	4	2	1	1	2	1	1	3	4	4	4	4	3	1	1	1	2	1	1	1	1	4	4	4	2	1	1	1	3	2	1	3	1	4	2	1	1	2	4	1	1	3	1	1	4	1	1	1
458	1	4	2	1	1	1	4	1	2	1	3	2	1	1	4	4	1	1	1	1	2	4	2	2	3	1	1	1	4	1	4	1	2	1	2	4	3	4	1	1	1	2	3	1	2	1	2	4	4
459	2	4	2	1	2	1	1	4	4	4	1	1	1	3	4	3	1	3	4	4	1	3	1	1	2	4	1	4	2	3	4	3	1	1	1	4	2	2	3	4	1	1	4	4	2	2	1	1	3
460	3	1	3	4	1	2	4	1	2	2	2	4	4	3	4	4	4	1	4	1	4	4	4	2	3	1	2	4	4	3	1	2	1	1	1	2	2	1	1	4	1	4	4	4	4	1	1	4	4
461	4	1	1	1	1	1	1	4	2	2	1	4	1	1	4	4	4	1	1	4	1	1	2	4	4	4	3	1	4	1	3	3	1	2	1	2	3	1	2	4	4	2	3	4	1	1	4	4	4
462	3	4	3	4	3	4	1	4	4	1	4	1	2	2	4	1	1	2	2	2	3	4	2	4	1	1	2	1	1	2	4	1	4	1	1	2	3	1	1	3	4	1	2	1	4	1	1	3	1
463	2	4	1	2	4	2	4	4	1	4	4	1	1	4	1	3	4	4	2	2	4	1	4	1	2	2	1	4	4	4	4	3	4	1	4	4	4	2	2	1	4	2	4	4	1	2	2	1	3
464	2	3	1	2	4	3	4	4	1	3	1	1	2	2	3	2	4	2	1	4	4	4	2	4	4	2	2	2	2	4	1	4	1	4	3	1	1	4	1	2	2	4	1	4	1	1	1	3	3
465	3	1	2	4	4	2	1	1	2	2	1	2	2	1	1	1	1	4	1	1	1	4	1	1	4	2	1	1	1	1	4	1	4	2	4	1	4	1	1	3	1	2	4	1	2	2	1	3	1
466	1	1	1	2	4	2	2	1	2	3	1	4	2	4	1	3	4	4	3	4	2	3	4	2	1	4	2	2	1	2	4	1	2	4	4	1	1	3	2	1	2	4	1	4	3	1	1	4	1
467	4	4	2	3	1	3	3	1	2	4	1	4	4	1	2	3	1	2	1	4	1	3	1	4	4	4	1	2	1	1	1	1	2	1	1	2	2	2	3	1	4	1	1	2	2	4	1	2	1
468	2	3	3	3	1	2	1	1	1	1	2	3	1	2	4	4	4	1	1	1	1	3	4	1	1	2	1	2	4	2	1	2	2	1	1	1	1	2	4	3	4	4	1	4	1	1	1	1	4
469	1	4	2	3	4	2	2	1	2	2	1	4	1	4	2	1	3	4	4	1	3	4	3	1	4	1	2	1	1	3	4	1	3	1	4	4	4	1	1	1	4	2	3	1	1	2	4	2	1
470	1	1	2	2	3	4	3	1	2	1	2	2	4	4	3	4	1	4	1	4	4	1	3	1	2	4	1	1	4	1	1	1	2	2	4	3	4	1	2	1	2	4	1	4	2	3	1	1	3
471	1	2	1	1	1	3	4	1	2	2	4	1	3	1	1	4	1	4	4	4	1	1	1	1	1	3	1	2	1	2	2	4	2	3	4	1	1	1	4	4	1	2	1	4	1	1	1	2	2
472	4	1	1	1	4	1	2	4	4	3	1	1	1	1	3	3	4	1	3	4	2	3	1	1	4	1	3	4	1	1	4	4	2	1	1	1	2	4	4	4	3	4	4	4	4	2	4	2	1
473	1	4	4	1	4	2	1	2	1	1	2	2	3	4	1	1	2	1	1	1	4	4	4	2	2	1	4	1	4	2	1	1	2	2	4	1	4	2	2	3	4	1	1	2	4	4	1	1	4
474	4	1	4	4	2	1	1	4	1	1	2	1	1	4	1	4	1	2	2	1	1	1	4	2	1	4	2	2	1	2	4	4	1	1	1	3	4	2	1	4	2	4	1	3	1	1	1	3	1
475	1	4	2	1	4	2	2	1	2	1	1	2	4	4	2	1	3	1	1	1	1	4	3	3	3	4	2	3	1	1	3	4	2	4	1	2	4	4	2	2	3	4	2	2	2	2	4	4	1
476	1	1	1	4	1	3	4	2	1	4	1	4	2	4	2	1	4	1	4	1	1	1	1	2	1	4	4	1	4	1	4	1	3	3	1	2	2	4	3	1	2	1	3	1	2	1	1	1	1
477	4	2	2	2	4	2	2	1	2	2	1	2	3	1	4	2	4	1	1	4	1	1	2	1	4	1	2	2	4	4	3	4	1	4	1	1	3	3	1	1	1	2	1	1	1	1	1	4	1
478	1	2	2	2	4	1	1	4	2	1	4	1	2	1	4	4	4	2	1	4	1	3	1	3	4	4	4	1	3	1	1	1	2	3	1	4	4	1	2	1	4	4	4	4	1	4	4	2	1
479	1	2	4	1	4	1	2	4	4	1	1	4	2	4	1	4	4	4	4	1	3	1	4	4	4	4	2	3	4	4	1	4	1	3	4	4	4	1	4	2	3	3	1	1	4	1	4	4	1
480	1	1	1	1	4	1	1	1	1	1	1	4	2	1	4	1	4	1	4	4	1	1	1	2	1	4	1	1	4	3	1	4	1	1	2	3	3	1	4	4	4	4	1	1	1	1	4	3	3
481	4	2	4	1	4	1	1	1	3	1	2	4	4	1	1	3	1	1	1	4	1	4	1	4	1	4	1	4	4	2	1	4	1	1	1	1	4	1	1	4	2	2	1	2	2	4	2	1	1
482	4	1	2	4	2	3	1	1	4	1	1	3	1	1	4	1	1	4	4	3	4	1	1	4	2	4	1	2	1	1	4	1	1	4	1	4	4	1	1	1	4	1	1	4	1	4	4	1	4
483	4	4	1	1	1	1	4	2	2	3	4	4	1	4	2	1	1	1	1	4	2	2	1	1	3	4	2	1	4	4	4	4	1	4	1	2	1	4	4	1	4	4	4	4	3	3	4	2	1
484	1	1	4	1	4	1	1	2	2	1	1	2	1	4	1	1	4	1	1	1	1	4	3	4	4	4	2	1	2	1	1	2	2	3	1	1	4	1	4	4	1	4	4	1	3	4	3	1	1
485	1	1	1	1	1	3	3	1	1	3	1	4	2	2	3	3	1	3	1	4	4	2	4	2	4	4	1	1	4	2	1	2	4	1	3	1	1	2	1	2	3	3	1	2	2	3	2	2	1
486	2	4	2	1	1	2	1	3	3	3	1	2	1	2	4	4	4	1	4	1	2	2	1	1	1	2	4	1	4	2	2	4	1	4	1	3	1	1	4	4	1	1	2	1	1	1	1	4	4
487	1	4	2	1	1	1	1	4	2	3	1	1	1	1	2	4	1	1	2	4	1	1	2	2	1	1	4	4	4	1	1	1	1	1	4	2	1	4	4	4	2	4	1	4	1	1	4	4	4
488	3	1	4	1	4	2	1	4	1	4	1	3	4	1	2	1	4	1	1	4	2	4	4	4	1	4	4	4	4	4	3	1	1	1	1	1	2	4	3	1	4	3	3	4	4	4	4	1	1
489	4	4	4	1	4	4	3	1	1	3	4	4	3	4	1	2	1	2	1	4	2	1	4	2	1	4	4	4	4	1	4	1	1	4	1	1	1	1	1	4	1	4	4	4	1	2	1	4	1
490	4	4	3	4	4	2	1	1	4	4	1	2	1	2	1	4	2	4	3	1	1	1	2	1	2	1	2	1	1	2	4	1	2	1	2	4	3	1	4	4	1	1	4	1	1	1	3	4	1
491	4	1	4	4	1	1	1	2	2	1	1	2	1	1	4	1	2	4	1	4	2	4	4	1	2	2	1	2	3	1	1	1	1	1	1	1	2	1	1	1	1	1	2	1	2	4	4	4	1
492	4	4	4	1	1	4	2	1	1	1	1	1	1	1	2	1	4	1	2	1	1	1	1	1	3	1	4	1	1	1	4	2	4	1	1	1	1	1	4	4	1	4	3	1	4	1	1	4	2
493	2	1	4	1	1	1	4	1	3	1	1	1	4	1	4	1	2	4	3	1	1	1	2	4	2	1	1	4	4	4	1	4	1	2	3	4	2	3	4	1	3	4	4	4	1	1	1	2	2
494	1	4	2	1	1	4	2	1	1	2	1	1	2	1	1	1	2	1	1	2	1	1	4	1	3	4	1	2	1	1	2	3	1	2	1	1	1	1	1	1	2	1	1	4	1	4	4	1	2
495	1	2	1	2	4	2	3	1	4	3	1	1	2	1	4	1	1	3	1	1	2	2	1	1	2	4	1	1	1	1	2	1	1	1	2	4	1	4	1	2	1	4	1	1	2	3	1	1	4
496	1	1	2	2	2	4	1	4	4	4	4	4	1	1	1	2	1	1	4	1	3	1	1	2	1	1	4	2	1	4	4	4	1	2	1	3	1	1	1	2	1	4	1	2	1	1	4	1	2
497	2	1	4	4	4	1	2	3	4	1	2	1	2	1	1	1	2	1	2	3	4	2	1	2	4	4	1	1	1	1	1	2	4	2	1	4	4	4	1	1	1	1	2	1	1	2	3	4	1
498	1	1	1	1	1	2	2	4	3	1	3	1	2	1	1	1	1	2	2	1	4	2	4	1	1	2	4	2	1	1	1	4	1	1	1	2	1	1	4	1	2	4	1	4	2	1	1	1	2
499	1	2	1	1	4	4	2	1	4	4	3	1	1	3	4	1	1	4	1	1	1	4	2	2	1	4	4	1	4	4	2	2	1	3	4	1	4	2	4	1	4	1	1	3	4	1	3	4	1
500	2	3	4	1	3	1	1	4	2	2	3	4	1	4	4	1	3	1	1	4	1	2	2	4	1	4	1	4	3	4	1	4	1	4	2	2	3	3	1	1	1	2	4	1	1	3	1	3	1
501	3	4	1	2	1	1	4	4	1	1	1	1	4	1	2	4	4	1	4	3	4	3	4	4	4	4	4	1	4	1	3	4	4	1	1	1	3	1	1	1	1	3	1	4	4	2	1	1	1
502	1	1	4	1	4	4	1	1	3	1	2	2	1	4	1	3	1	4	1	1	1	1	3	4	1	4	1	2	4	1	4	1	1	3	3	4	2	4	1	1	4	1	1	4	1	1	1	1	3
503	1	4	3	1	4	1	3	4	1	1	1	1	3	1	4	1	1	2	1	3	1	4	2	3	4	1	4	1	1	4	4	2	4	1	4	4	1	2	1	4	1	1	1	4	2	3	4	4	2
504	1	1	1	2	4	1	3	4	3	4	4	4	4	4	1	4	1	1	2	1	2	4	2	3	4	4	1	4	4	4	4	4	4	4	2	1	1	1	4	4	3	1	4	3	1	1	3	1	4
505	1	2	1	1	3	1	4	4	1	3	4	3	1	1	3	1	3	1	3	3	4	4	1	1	1	1	4	4	2	1	4	4	4	1	1	1	4	4	3	4	4	4	4	4	3	1	4	1	3
506	4	2	1	4	1	4	1	1	4	1	1	1	1	1	1	2	4	1	1	1	4	1	4	2	4	1	1	3	3	3	3	1	1	3	1	3	1	4	3	4	4	4	1	3	4	1	1	2	4
507	1	4	1	4	1	2	1	2	3	1	4	4	3	4	4	3	1	4	4	1	4	2	2	1	2	1	2	4	2	3	4	4	4	4	4	3	1	4	4	4	3	4	4	4	2	1	1	4	1
508	4	1	4	4	4	1	4	1	1	4	1	4	4	4	4	3	1	4	4	4	1	1	4	4	4	1	4	3	4	4	4	1	4	3	4	1	4	3	1	1	1	4	4	4	1	1	4	2	3
509	1	1	1	4	2	4	4	1	2	4	4	4	4	3	1	4	1	4	2	1	3	4	4	4	4	3	4	4	1	4	2	1	1	1	1	2	4	1	1	4	1	4	1	3	4	4	1	4	4
510	4	4	1	4	4	3	3	4	4	4	1	4	4	1	3	1	2	4	1	1	4	3	1	3	1	4	1	1	4	1	4	1	2	4	3	4	4	1	2	4	3	1	4	1	4	4	4	4	4
511	4	4	4	1	4	1	4	4	4	4	3	3	1	4	1	1	4	4	1	1	2	4	4	4	1	1	3	1	4	1	4	4	4	1	2	4	1	4	1	4	1	3	3	4	1	4	2	4	1
512	1	1	3	1	1	4	2	4	4	4	4	4	4	1	4	4	2	3	1	1	4	1	4	1	2	1	1	4	1	4	1	4	4	2	4	1	4	1	1	1	4	1	1	1	1	1	1	1	1
513	4	1	4	4	4	2	1	4	1	1	4	4	2	4	1	1	1	1	4	4	1	4	2	4	4	1	4	1	1	4	4	1	1	1	1	4	2	3	1	1	2	1	1	4	1	1	4	3	4
514	1	1	4	3	4	1	1	2	1	2	4	2	2	1	2	3	4	4	3	1	4	4	4	4	3	4	1	3	1	4	4	3	3	1	4	3	3	3	4	4	1	1	1	1	2	2	1	1	2
515	1	4	2	1	2	3	2	1	1	4	4	4	4	4	1	3	4	1	2	2	1	2	4	2	4	4	1	2	3	4	1	2	4	4	4	1	1	3	1	2	3	4	1	2	3	4	4	4	1
516	1	4	4	4	3	3	1	2	1	1	1	1	2	4	1	1	1	1	1	2	3	3	1	3	4	3	4	2	2	3	1	2	2	1	2	4	2	1	3	4	4	4	2	1	2	3	4	4	2
517	1	1	2	4	4	4	1	1	4	1	1	1	1	1	1	3	2	1	3	1	4	4	1	1	4	1	4	4	4	1	2	4	4	1	1	4	2	1	1	1	3	4	4	3	1	3	4	3	4
518	4	4	2	4	1	2	4	4	4	3	4	4	4	4	4	4	4	2	4	4	4	4	4	2	1	4	1	3	2	1	1	4	4	4	1	3	1	4	3	4	4	4	1	4	4	1	4	1	4
519	1	1	1	1	1	1	4	1	1	1	1	3	4	2	4	2	1	1	4	2	3	4	1	2	1	1	1	4	1	4	1	4	4	4	4	1	4	4	4	4	1	4	3	4	3	4	1	1	2
520	4	4	1	4	3	3	3	3	3	4	1	1	1	1	1	1	3	4	4	4	3	1	4	1	1	1	1	1	3	1	1	1	1	2	1	1	3	1	1	4	1	4	3	4	3	4	4	4	2
521	1	3	1	4	1	1	3	4	3	1	4	1	1	2	1	4	1	4	4	4	1	4	1	4	1	1	2	4	3	4	4	1	2	4	3	3	3	4	1	4	1	2	3	4	4	4	2	3	2
522	3	4	3	4	1	2	4	4	4	4	2	3	3	2	1	4	4	4	1	2	4	4	4	4	1	4	4	3	4	1	3	1	1	3	4	1	1	1	1	4	1	1	4	1	3	1	1	4	1
523	4	1	4	4	3	1	1	3	1	1	1	1	4	4	2	4	4	4	2	1	1	1	1	4	4	4	1	1	4	1	1	4	4	4	4	1	4	1	2	1	4	1	4	2	1	1	1	2	4
524	1	1	2	1	1	1	1	3	1	2	1	3	4	1	1	1	4	2	3	2	4	1	2	1	1	4	1	4	4	4	2	2	4	1	1	1	1	3	4	4	1	3	3	4	2	4	1	4	1
525	2	1	1	2	2	4	4	4	4	1	4	4	1	4	4	2	1	4	4	4	1	2	1	4	4	1	2	1	1	3	1	1	4	4	4	2	1	2	2	2	1	2	4	2	1	3	1	4	1
526	3	1	1	2	1	1	2	4	1	2	4	4	1	1	4	1	1	1	3	4	1	3	2	3	1	2	2	2	2	1	2	1	1	4	4	2	1	4	2	4	4	2	1	4	2	2	1	1	4
527	1	1	1	1	1	4	4	3	4	1	4	4	4	4	1	4	3	4	1	1	1	1	1	1	2	1	1	1	4	1	1	4	1	2	1	1	2	3	1	1	4	2	1	1	1	2	1	1	1
528	1	2	2	1	1	1	1	2	4	1	3	4	1	3	1	2	1	1	1	4	4	3	4	1	4	4	1	1	1	1	1	2	1	4	4	1	2	4	1	1	1	1	1	4	2	1	1	1	1
529	1	1	2	1	2	2	1	4	1	2	2	4	4	4	4	3	1	2	4	4	4	1	2	4	4	1	4	2	1	1	2	4	2	3	4	1	2	4	1	1	3	4	1	1	1	1	1	1	2
530	2	3	1	1	4	1	1	1	1	2	1	1	2	1	4	1	2	1	1	1	2	2	4	1	1	3	4	1	1	1	4	1	4	2	1	4	1	2	4	4	4	4	4	4	4	1	4	1	3
531	1	3	4	1	4	2	3	1	4	1	1	1	1	1	1	2	1	1	1	1	2	1	4	2	1	3	1	2	1	1	2	1	1	3	1	1	1	4	1	1	1	1	1	1	1	4	1	4	1
532	2	1	1	1	1	1	1	4	4	2	2	1	1	1	1	2	1	1	4	1	1	4	4	4	1	4	1	4	1	4	1	4	1	4	4	1	1	4	4	1	4	4	4	4	4	1	1	1	1
533	4	1	1	4	1	4	4	4	1	1	1	4	1	4	1	3	1	4	1	1	1	3	1	4	1	3	1	4	1	1	1	4	4	4	1	3	1	1	1	1	1	2	2	2	2	2	4	2	4
534	4	4	3	1	1	2	1	1	1	4	4	2	3	3	1	2	1	4	4	3	4	2	1	2	4	4	1	1	1	1	2	4	1	1	4	2	1	1	2	4	4	4	1	4	4	4	2	2	2
535	1	1	4	1	1	2	2	4	1	2	3	1	4	3	1	2	2	1	2	1	1	2	4	4	2	4	2	2	1	1	2	3	1	1	4	2	1	1	1	3	1	1	1	4	4	4	1	4	2
536	1	1	4	1	3	2	1	3	1	4	4	1	1	3	1	1	4	1	4	4	2	4	3	4	1	1	2	3	4	4	2	3	1	1	1	2	1	1	1	1	1	3	4	1	4	4	4	2	4
537	1	3	1	1	2	3	1	1	2	4	2	4	1	3	1	4	1	4	4	1	4	1	3	4	1	4	3	2	3	4	2	4	1	1	2	1	2	1	1	1	1	1	2	1	4	4	1	4	4
538	1	3	1	1	1	1	1	1	1	4	4	3	4	4	4	1	2	4	4	4	4	4	4	4	3	1	4	1	1	4	1	1	4	4	3	4	4	4	1	1	1	1	1	2	4	4	4	4	4
539	1	1	4	2	1	4	2	1	1	2	1	1	1	1	4	4	4	1	1	2	4	2	1	4	2	1	4	1	1	1	4	4	1	2	1	4	1	4	2	4	4	1	2	1	2	2	1	1	4
540	4	2	2	2	1	1	2	1	1	2	1	4	2	1	1	4	1	1	1	1	4	2	1	1	4	2	4	2	1	4	1	3	4	1	1	1	1	4	2	1	4	1	3	4	1	1	4	1	4
541	4	2	4	4	1	1	1	1	1	1	4	1	4	1	2	1	1	1	1	4	1	4	1	2	1	1	1	4	1	1	4	1	2	1	1	2	1	1	1	1	4	4	1	1	4	2	4	1	1
542	4	4	1	4	3	1	2	1	4	4	1	1	1	1	1	2	1	1	1	1	4	3	1	1	4	1	2	1	1	4	2	2	2	1	1	4	1	2	4	1	1	1	4	1	1	1	1	1	1
543	4	2	4	1	4	4	4	4	3	1	1	2	2	4	4	4	2	3	2	1	3	4	4	4	4	1	1	1	1	1	1	1	4	3	4	4	4	2	4	2	1	4	1	3	4	1	1	1	1
544	1	4	4	4	1	1	1	4	4	1	4	3	4	1	2	4	4	4	4	4	2	2	2	3	1	1	3	4	4	3	1	1	2	4	4	2	3	4	4	1	4	4	4	2	2	2	4	1	4
545	4	2	4	1	4	4	3	3	1	1	2	4	4	2	4	4	4	3	4	1	3	4	4	4	4	4	3	1	4	2	3	3	3	3	1	1	4	3	4	4	4	3	4	2	3	4	1	4	1
546	4	1	3	1	4	3	3	1	4	1	4	4	4	1	3	3	1	1	4	1	1	4	2	1	3	2	3	1	4	2	1	2	1	1	4	2	4	3	4	3	1	1	1	4	3	1	4	2	3
547	4	4	4	4	1	3	1	4	4	1	2	1	4	1	1	3	4	4	1	3	1	2	3	1	4	3	4	1	4	3	4	1	2	3	4	3	4	4	4	1	2	1	1	1	2	1	4	1	1
548	4	4	4	1	1	1	4	1	4	4	3	4	4	4	3	1	4	4	1	4	3	4	4	4	4	1	1	2	4	3	1	4	1	4	1	2	3	4	4	1	2	1	4	1	2	1	4	1	1
549	1	4	4	1	4	1	4	1	1	2	1	1	1	4	2	4	2	2	2	1	4	1	2	2	2	1	3	1	1	3	1	3	2	4	4	4	1	3	4	4	4	4	1	2	2	1	2	4	4
550	1	1	3	1	1	4	1	4	3	3	4	3	4	3	3	1	4	4	4	1	2	4	3	4	4	1	4	2	4	1	2	3	4	4	4	4	4	4	3	2	1	3	2	3	4	4	1	4	4
551	1	1	4	1	4	3	4	4	4	4	2	2	1	2	4	1	1	2	1	2	3	4	1	1	3	1	1	3	4	3	3	3	3	4	1	2	4	3	4	1	1	2	1	3	3	4	2	4	3
552	4	4	3	1	1	1	4	2	3	4	1	2	4	3	4	1	2	2	4	4	3	4	2	1	4	4	4	3	4	4	4	4	3	1	1	1	4	4	3	1	1	4	1	1	1	4	4	4	4
553	4	1	1	4	2	4	3	3	1	1	1	1	2	4	4	3	1	4	4	4	3	1	4	3	4	2	3	2	4	4	4	4	4	4	4	4	1	3	3	2	1	4	1	2	1	1	3	3	4
554	1	2	2	1	4	4	1	2	1	1	2	2	4	1	1	2	4	4	1	4	1	1	4	1	4	4	4	1	1	3	4	2	3	1	4	1	1	4	4	4	1	1	4	1	3	1	2	3	1
555	2	4	4	4	1	4	3	2	4	4	4	4	1	1	4	1	4	1	4	2	4	4	4	2	2	3	4	1	4	1	1	4	3	1	3	4	4	4	4	4	1	1	4	1	1	4	4	3	2
556	4	3	4	4	1	4	1	4	2	4	2	4	4	2	3	1	2	4	1	1	4	4	4	3	1	4	4	4	1	4	4	4	4	4	1	2	1	3	4	4	4	4	1	1	1	1	1	1	1
557	1	1	1	2	4	4	4	1	4	4	1	1	1	4	1	3	4	4	4	4	4	1	2	4	4	4	3	4	1	1	4	2	4	1	2	1	4	1	1	4	4	4	4	1	1	4	3	4	1
558	2	4	2	3	1	4	2	4	1	4	4	3	4	4	3	4	1	4	2	1	2	1	3	4	4	4	3	1	1	1	1	3	4	3	1	4	1	4	3	1	2	4	1	3	4	3	1	4	4
559	3	1	1	1	1	1	4	4	3	4	3	4	4	4	3	1	1	1	3	4	3	4	1	2	1	2	3	4	4	3	4	4	4	4	4	4	1	2	4	4	4	4	1	1	1	1	3	3	4
560	3	4	4	4	4	4	3	3	4	1	4	3	3	3	3	1	4	3	2	1	1	2	4	3	4	2	4	1	1	1	1	4	1	1	1	1	2	3	4	1	2	3	1	4	1	3	3	1	1
561	4	4	3	2	4	3	4	4	4	2	4	1	1	2	3	1	2	2	3	1	4	4	4	4	1	2	1	3	1	3	3	3	3	3	1	1	4	4	1	4	2	4	3	1	4	4	4	4	1
562	1	4	4	1	4	1	1	3	1	4	2	4	4	1	2	1	4	1	4	2	3	4	1	4	3	4	1	1	1	4	1	1	4	4	2	4	4	4	4	1	4	4	4	4	3	3	4	3	4
563	3	4	4	2	1	1	2	3	4	4	2	4	1	1	4	1	4	4	4	1	3	1	3	1	2	4	4	3	4	1	1	2	1	1	2	4	3	4	4	3	4	4	3	4	1	2	4	2	3
564	3	4	1	1	4	1	4	3	2	4	1	2	1	4	1	4	1	3	3	4	1	4	1	4	3	4	4	4	2	4	1	3	4	3	4	4	2	1	4	4	4	4	3	4	1	2	4	4	4
565	4	4	3	4	2	4	4	1	3	2	4	3	4	3	1	4	4	4	4	4	4	3	4	2	3	4	1	1	4	4	3	4	1	2	4	4	2	4	2	4	3	1	4	4	3	4	4	4	4
566	1	4	4	4	4	4	4	3	1	1	3	1	4	4	4	1	4	4	1	1	1	1	4	3	3	1	3	3	4	4	4	4	1	1	4	4	1	4	4	4	4	4	1	4	2	1	3	1	4
567	1	4	1	2	4	4	4	2	4	2	4	1	1	4	4	4	3	4	4	2	4	1	1	1	1	1	1	4	2	4	4	3	3	4	3	1	4	4	1	2	1	1	3	1	4	4	4	4	4
568	4	2	4	2	4	4	1	1	1	1	4	2	4	1	1	2	4	1	1	2	1	1	1	1	2	3	1	3	4	4	4	3	1	1	1	2	3	1	3	4	1	4	1	1	1	1	1	4	1
569	2	1	4	1	1	1	3	1	1	1	4	1	1	1	1	2	4	1	1	4	1	1	2	2	1	2	2	1	1	1	2	1	4	1	2	1	4	4	3	4	1	2	1	2	2	2	1	1	1
570	4	4	4	1	1	2	1	1	3	2	4	1	4	2	4	4	3	2	2	4	4	2	2	4	2	2	2	1	4	1	2	1	1	1	1	1	4	1	3	4	4	4	1	3	1	2	2	2	2
571	2	1	1	4	2	1	2	1	1	4	2	1	1	1	1	4	1	4	2	1	2	4	4	4	1	4	1	4	2	4	3	1	2	4	1	1	2	4	4	1	1	1	1	2	1	1	2	4	1
572	4	4	3	1	2	1	1	2	1	2	4	1	4	1	1	1	1	1	1	1	4	1	1	2	1	2	3	4	1	1	1	1	4	1	1	1	4	2	1	1	1	4	4	4	1	4	1	1	4
573	2	1	1	1	2	1	1	4	1	1	1	1	2	2	2	3	4	4	4	1	2	3	4	3	4	4	4	4	1	4	4	3	4	4	4	3	4	4	1	2	4	1	4	4	1	1	3	4	2
574	2	3	1	4	4	1	4	3	4	1	4	3	1	4	4	4	4	4	4	4	4	1	4	4	2	3	1	4	4	4	4	4	1	4	3	1	4	3	4	2	1	1	4	3	4	1	1	1	2
575	4	4	4	1	4	4	1	2	4	4	3	2	4	4	1	1	3	4	4	3	1	4	4	1	4	3	4	4	3	4	4	4	4	2	1	2	4	4	1	1	3	4	4	4	4	4	4	4	1
576	4	3	4	4	2	4	4	2	1	2	4	2	4	4	1	2	2	4	4	2	4	1	4	4	4	4	1	3	3	4	1	1	4	4	4	1	2	4	4	1	1	4	1	2	3	4	3	3	4
577	4	4	4	1	1	4	3	3	1	1	1	1	3	4	3	1	4	4	4	4	4	4	3	1	1	2	3	1	4	1	4	3	4	1	1	1	2	4	1	2	2	4	4	3	1	1	3	1	2
578	3	4	4	2	2	2	4	3	4	3	4	2	4	4	4	4	4	4	4	3	4	1	4	3	4	4	1	4	3	4	1	4	1	4	1	4	2	4	1	4	2	2	3	4	3	1	3	1	3
579	2	1	1	1	1	4	4	3	4	3	4	1	1	2	1	2	1	4	1	1	2	4	4	1	4	2	4	4	3	1	3	4	4	3	4	1	4	1	4	4	3	4	4	4	1	1	4	1	1
580	2	4	4	4	2	3	1	4	1	1	4	4	4	3	1	3	1	3	3	4	3	1	4	3	4	1	1	2	4	1	1	4	1	2	4	4	2	1	3	4	4	1	1	4	4	1	4	1	4
581	1	1	1	3	4	1	4	4	2	4	4	1	1	3	1	1	1	1	1	4	1	1	1	1	1	4	4	4	1	2	4	1	1	1	1	1	1	4	1	1	4	4	2	1	3	1	1	2	1
582	1	3	2	4	1	4	1	3	4	1	4	2	1	4	4	1	1	3	1	1	1	1	1	2	2	4	4	1	4	1	1	1	4	1	1	1	2	4	4	1	2	2	1	2	2	2	1	4	4
583	4	1	1	4	4	4	1	3	1	1	4	1	4	1	4	4	1	2	1	1	1	1	2	1	1	4	3	4	1	2	1	1	4	1	4	3	1	3	1	1	1	1	1	1	1	1	4	4	3
584	1	2	2	4	1	4	1	4	3	1	1	2	1	3	3	2	4	1	4	4	4	1	4	3	4	1	2	1	1	4	1	2	1	1	1	1	3	2	2	4	1	1	2	2	4	4	1	1	4
585	1	1	4	1	2	3	2	3	1	4	1	1	1	1	4	3	4	3	2	3	4	3	2	1	1	1	3	1	2	2	2	1	1	1	1	3	1	1	4	1	1	1	4	2	1	1	1	4	4
586	4	1	3	4	2	4	1	1	1	4	3	1	4	1	2	4	1	1	1	3	4	1	4	1	1	2	2	4	4	4	4	1	1	4	4	2	4	1	3	3	4	4	2	1	1	1	1	3	4
587	1	4	4	4	4	1	1	1	2	2	1	2	3	1	1	2	4	1	4	1	4	2	1	1	1	1	1	4	1	1	1	2	1	1	1	1	1	2	1	1	1	4	1	1	4	3	1	4	4
588	1	1	4	1	2	2	1	1	4	4	4	4	4	4	1	4	4	4	4	4	4	1	2	2	1	1	4	4	2	4	1	4	4	4	1	2	4	1	1	4	1	3	4	4	4	4	4	4	4
589	1	2	1	1	2	2	2	2	4	1	2	2	4	2	1	1	1	4	1	3	3	1	1	3	4	3	3	3	3	1	1	1	4	3	1	1	1	1	4	1	1	3	1	3	4	4	4	2	2
590	1	1	1	1	4	1	4	4	3	1	1	1	1	2	1	2	2	4	2	1	4	4	1	2	1	4	2	3	1	1	1	2	1	2	1	2	3	1	1	1	3	1	1	3	2	3	4	4	3
591	2	1	3	4	4	2	3	1	3	1	1	1	2	3	2	4	4	2	1	4	1	2	1	4	4	4	1	1	2	3	1	2	4	2	1	4	1	4	1	2	2	1	1	4	2	3	3	4	1
592	1	4	1	1	4	1	1	4	4	2	3	1	4	2	4	4	2	2	4	4	2	4	1	4	1	4	1	4	3	1	1	1	2	1	4	1	1	1	4	4	1	1	3	3	1	1	4	3	3
593	4	2	1	1	4	2	3	1	3	1	1	3	1	4	4	1	4	4	4	1	4	4	1	2	1	2	1	1	4	4	2	1	4	4	2	1	4	1	1	1	4	4	1	4	4	4	4	3	4
594	3	4	3	4	1	2	3	1	1	3	4	3	4	4	4	4	1	2	2	1	3	1	3	3	1	2	2	1	1	4	3	3	4	1	1	2	1	2	4	1	2	1	1	3	2	1	1	3	1
595	4	4	4	1	4	1	3	2	1	2	1	4	4	2	1	4	4	2	1	1	2	4	4	3	1	4	4	1	1	3	4	4	4	4	2	1	1	4	4	4	3	4	1	1	4	1	1	4	1
596	2	4	1	4	1	2	1	1	4	1	1	2	3	2	1	1	2	1	4	4	4	2	1	2	1	1	4	2	3	3	4	2	4	4	4	2	1	4	1	1	2	1	1	1	4	4	4	4	4
597	1	4	4	4	1	1	4	2	2	4	2	4	1	4	1	4	1	4	4	3	4	4	1	3	1	2	4	1	1	4	1	2	4	1	2	4	3	1	4	4	4	4	2	1	3	1	3	3	4
598	4	4	1	4	1	3	1	1	1	1	1	1	4	1	4	4	4	1	1	1	1	1	1	2	4	3	4	4	2	1	3	1	3	4	1	1	1	1	4	1	2	4	2	4	3	1	4	1	1
599	4	1	2	1	3	1	2	4	1	1	1	1	3	1	2	4	2	4	3	1	4	1	1	2	2	1	2	2	2	1	2	2	1	1	4	1	1	2	1	1	4	2	2	1	1	1	1	1	2
600	2	4	1	1	2	2	3	4	3	2	4	3	3	3	1	1	1	1	4	4	1	1	1	4	3	1	1	4	1	4	2	4	1	3	1	2	1	1	4	1	4	1	2	3	3	1	1	1	2
601	1	2	4	1	1	1	1	1	4	4	3	4	1	4	4	1	4	4	2	4	2	2	1	4	2	3	1	4	2	4	4	2	2	2	1	2	4	4	4	1	4	4	2	1	2	1	1	1	1
602	1	1	4	1	1	1	4	4	3	1	1	4	2	4	1	2	1	1	1	2	3	2	1	2	2	1	1	4	1	1	1	4	1	4	2	1	1	4	1	1	4	3	4	1	3	1	2	1	4
603	4	2	2	1	1	4	4	4	2	2	1	3	1	1	1	4	1	1	2	1	1	4	2	2	3	1	2	1	2	1	4	4	2	1	4	1	1	4	1	1	2	3	3	4	4	1	3	4	4
604	1	4	2	4	4	2	3	1	1	1	2	4	3	1	4	4	1	2	2	4	4	1	4	1	1	1	1	1	4	1	3	4	1	1	4	2	1	4	2	3	1	1	4	4	4	4	1	1	2
605	2	2	2	4	1	2	4	2	1	1	1	3	1	3	2	1	2	2	2	2	4	4	4	1	1	1	1	4	4	1	1	4	2	2	4	1	4	4	1	1	2	1	4	4	2	3	4	4	4
606	2	4	2	1	4	2	4	4	4	1	4	1	2	1	4	4	1	1	4	1	2	4	1	2	2	4	4	3	1	1	1	4	3	4	1	3	3	1	1	1	4	2	3	1	2	1	1	1	1
607	2	2	2	4	2	4	4	4	2	1	4	2	1	1	2	4	2	3	4	4	3	3	1	1	2	3	1	4	1	1	2	1	2	1	1	1	3	1	2	2	4	3	1	1	4	1	3	3	1
608	1	4	2	4	1	1	4	1	1	3	1	2	1	1	3	4	4	1	3	1	2	2	1	1	3	4	1	4	1	2	2	1	2	1	3	4	4	1	1	1	1	2	2	1	1	3	1	1	4
609	1	1	1	1	2	4	4	2	4	2	4	1	1	2	1	4	1	1	3	1	4	2	3	4	3	4	1	1	2	1	1	1	3	1	1	3	1	2	4	1	4	4	3	4	1	1	1	4	1
610	2	1	3	4	2	2	1	4	1	4	1	2	1	3	1	1	1	2	3	4	1	1	4	1	1	1	2	1	1	4	1	3	1	1	3	3	1	1	2	4	2	1	1	1	2	3	1	1	2
611	4	4	3	4	4	2	2	1	2	4	4	2	1	2	1	1	2	4	2	2	2	1	1	2	1	3	1	4	1	2	1	3	4	4	3	2	1	4	1	3	1	4	3	4	1	1	4	1	1
612	4	4	1	4	1	2	1	4	2	1	4	4	2	4	1	4	1	1	2	1	2	4	4	1	4	1	1	1	2	4	3	1	2	1	2	1	2	1	3	3	1	4	1	3	1	1	2	3	1
613	4	4	2	1	1	1	1	3	4	1	1	1	4	1	3	1	2	1	1	4	1	4	4	4	4	2	1	1	1	4	1	4	1	4	4	2	4	4	4	4	1	1	4	4	1	1	4	4	1
614	2	4	4	1	1	1	4	1	3	1	4	2	1	1	1	1	1	4	1	1	4	1	4	1	1	2	3	2	1	4	4	3	1	1	2	1	2	4	1	1	1	1	4	1	4	4	4	4	4
615	4	1	3	4	2	4	2	2	2	4	4	4	2	1	4	1	1	4	2	1	2	2	4	1	2	1	1	2	4	4	1	1	1	1	1	1	2	2	1	4	4	2	1	1	2	3	3	4	1
616	1	4	1	4	2	4	1	3	1	1	1	1	2	1	1	2	4	4	2	1	2	4	1	4	2	1	1	1	1	1	3	4	2	2	1	2	3	1	1	3	1	1	1	2	4	1	3	4	3
617	1	1	4	4	1	1	4	1	1	1	4	1	4	2	1	1	4	1	4	4	4	4	4	1	3	1	1	2	1	1	4	3	4	1	1	4	4	3	4	4	4	4	4	3	4	1	1	3	4
618	4	2	2	4	4	1	4	1	4	4	2	3	1	2	4	2	3	3	4	2	4	4	3	4	2	3	4	1	4	1	1	1	2	4	4	1	2	1	1	4	4	4	2	1	4	1	4	2	4
619	1	4	1	2	2	2	3	1	4	2	2	4	1	2	3	3	3	1	4	4	1	4	3	1	3	1	1	1	3	4	4	3	3	3	4	1	1	1	4	4	4	1	2	1	4	4	3	4	2
620	4	4	4	2	4	1	3	3	1	3	1	1	4	3	2	1	1	1	3	1	1	2	4	1	2	3	4	4	3	1	1	4	4	4	4	1	2	4	4	1	4	4	4	4	1	3	3	2	1
621	3	1	3	3	1	3	3	4	1	1	4	3	1	4	1	4	1	4	4	4	1	4	1	2	2	1	4	4	4	1	4	3	3	4	1	3	1	1	1	4	1	4	1	2	4	1	4	1	4
622	1	1	4	1	1	4	2	2	3	1	1	4	4	1	1	4	2	1	3	1	1	3	1	4	1	1	1	4	1	1	1	1	4	4	4	4	1	1	2	1	2	1	4	1	2	1	1	1	4
623	2	1	1	1	4	4	1	2	3	1	1	1	1	2	1	1	1	4	1	2	2	3	2	4	1	2	1	4	4	3	1	2	2	1	1	1	4	4	4	1	4	1	4	2	3	1	1	4	4
624	1	1	1	4	1	1	1	1	1	4	3	3	1	1	3	4	1	4	1	2	1	4	1	3	1	4	4	2	1	4	1	1	1	1	3	4	1	2	3	4	2	1	3	4	1	4	4	4	1
625	1	2	1	3	2	1	1	4	4	1	2	4	4	2	2	1	1	2	1	4	1	2	1	1	1	4	4	1	1	1	4	1	3	1	2	1	1	4	1	4	4	4	4	2	1	1	1	2	4
626	1	4	2	2	3	1	1	1	1	2	3	1	2	4	1	2	3	4	1	1	1	2	1	1	3	1	1	4	4	2	4	4	4	4	1	4	1	2	2	2	3	1	1	1	1	2	1	4	1
627	4	4	1	2	1	4	2	4	1	4	2	4	2	1	1	2	3	1	1	3	3	2	3	4	4	1	4	1	1	1	1	4	1	1	4	4	2	2	1	2	1	1	4	4	1	1	1	4	1
628	1	1	1	2	1	1	2	2	4	4	4	4	1	1	2	1	3	4	4	4	4	4	3	4	2	2	3	1	2	2	2	4	1	4	3	1	2	4	4	2	3	4	4	1	4	4	4	4	1
629	4	2	4	4	1	4	1	1	2	3	3	1	1	2	1	1	1	2	2	2	2	2	4	2	1	4	4	4	1	2	4	4	2	1	1	4	2	4	1	1	1	1	2	2	4	1	3	4	1
630	1	3	1	2	4	4	4	4	2	3	1	1	4	2	1	4	1	1	2	3	1	1	1	4	1	1	1	1	2	3	1	1	2	4	4	4	4	2	1	1	2	2	4	3	4	4	1	2	1
631	1	2	1	4	1	4	1	2	1	2	4	4	1	2	4	4	1	1	3	4	4	2	4	1	4	4	4	1	3	3	1	1	2	4	1	1	1	4	4	1	1	1	1	1	4	1	1	1	4
632	1	4	4	2	4	1	4	1	4	2	2	4	1	4	4	4	1	1	4	4	4	1	2	1	2	1	1	2	4	4	3	1	1	1	2	4	2	2	2	1	1	1	4	2	3	2	1	4	1
633	4	2	1	1	1	2	1	4	4	4	2	2	4	4	4	4	2	1	1	1	4	4	2	1	4	4	2	4	1	4	4	2	4	1	2	4	1	2	4	1	2	3	1	1	3	1	2	1	1
634	4	4	4	1	2	3	1	4	1	3	4	4	4	2	1	4	2	1	1	2	2	4	1	2	1	2	2	3	4	2	4	1	4	2	2	1	2	4	1	4	3	1	1	2	3	3	4	4	1
635	4	1	4	4	3	1	1	2	1	4	2	2	4	2	1	4	4	1	4	2	1	2	1	4	4	1	1	1	1	4	4	4	4	1	4	3	4	4	1	2	2	1	2	2	1	1	1	4	1
636	4	4	1	1	4	1	1	4	2	2	4	1	2	2	4	4	4	1	4	4	4	2	3	1	1	4	1	4	2	4	4	4	1	2	4	1	2	2	1	4	4	1	2	4	1	3	1	1	1
637	2	4	2	1	1	2	2	2	2	4	2	4	1	4	4	4	1	2	1	4	2	2	1	1	2	3	1	2	3	4	1	2	1	4	4	1	1	4	1	2	3	1	1	4	2	2	2	4	3
638	2	3	4	2	1	1	1	1	1	2	1	1	1	4	1	1	2	4	1	1	1	4	4	2	3	1	1	2	2	4	1	3	1	1	1	1	1	1	3	1	1	4	1	2	4	1	2	4	4
639	2	1	1	2	3	3	2	4	1	1	1	1	4	4	4	2	3	4	1	2	4	3	1	1	1	1	4	1	4	1	4	4	1	3	1	1	2	2	2	4	4	2	2	1	1	3	1	4	2
640	2	1	1	2	3	1	4	3	1	1	3	4	2	1	4	4	4	3	1	2	2	2	1	2	4	4	4	1	4	2	1	4	1	1	3	1	3	1	1	2	1	1	2	1	1	3	4	4	2
641	3	3	4	1	4	1	2	1	4	2	4	2	3	1	2	1	4	1	4	1	1	2	1	1	1	1	2	1	2	3	3	4	1	2	2	2	4	2	1	2	2	3	4	3	1	1	4	4	3
642	1	1	1	1	1	1	4	4	4	1	1	4	4	1	1	2	3	4	1	1	4	4	1	4	1	2	3	1	4	1	1	1	3	2	2	1	2	2	2	1	1	1	4	4	1	4	2	1	2
643	1	1	4	4	1	1	3	4	1	3	1	2	1	4	4	4	1	4	4	1	2	1	1	1	4	1	2	1	1	2	1	1	2	2	4	4	4	1	1	3	1	2	1	1	1	3	1	1	3
644	3	4	2	1	1	1	1	1	3	4	1	2	1	2	2	1	1	1	4	1	1	1	1	2	1	1	1	4	1	1	4	1	1	1	1	3	1	1	2	1	2	1	4	1	3	1	1	1	1
645	2	2	1	4	1	2	4	4	4	3	1	2	4	1	1	4	1	4	4	1	1	1	3	1	4	4	2	1	3	1	2	4	2	1	4	1	4	1	1	1	3	4	3	4	1	4	1	2	1
646	1	1	1	2	1	4	4	2	3	1	1	2	1	2	4	4	1	1	1	1	1	2	2	2	4	3	1	1	1	1	1	2	1	1	4	1	3	4	3	4	4	2	1	4	1	2	1	4	4
647	4	1	1	1	1	2	1	3	4	2	4	1	4	2	2	1	1	4	4	1	3	4	4	2	2	4	1	3	4	1	1	1	1	1	1	2	4	1	2	1	1	1	3	1	2	4	4	4	4
648	2	4	1	4	1	1	2	1	1	1	2	4	3	1	2	3	1	2	2	4	1	2	3	4	4	1	2	4	3	1	4	1	2	1	1	2	1	4	2	1	1	2	1	1	1	1	2	1	4
649	1	4	1	1	1	1	3	1	2	4	1	2	1	2	3	1	1	2	4	4	2	4	1	1	1	1	2	4	1	2	1	4	1	1	2	1	1	4	1	3	3	1	4	4	1	1	1	2	1
650	1	1	2	2	4	3	1	4	2	1	2	2	4	4	2	1	1	2	2	4	4	2	3	1	2	2	1	4	4	2	1	1	4	1	4	2	2	1	1	3	4	1	3	1	3	4	1	1	3
651	3	4	1	1	1	1	1	1	2	1	2	4	1	2	2	4	2	1	2	2	1	3	3	1	4	2	2	1	1	1	4	4	1	1	4	1	1	4	1	4	4	4	1	3	1	4	4	1	1
652	4	1	1	2	1	2	4	4	1	1	1	4	4	4	1	2	4	1	1	2	4	4	2	1	1	4	3	4	1	1	1	2	1	1	1	1	2	4	2	2	1	2	1	1	1	1	4	1	1
653	4	3	1	1	2	4	1	4	4	4	4	2	1	2	4	4	1	2	3	1	2	1	3	4	4	4	3	4	1	3	3	1	3	1	1	2	3	1	1	3	4	2	2	1	4	4	1	3	4
654	1	2	3	4	1	4	2	3	3	3	4	1	4	1	2	4	2	1	3	3	4	4	4	1	3	1	1	1	4	2	1	1	4	1	4	2	3	1	1	3	4	3	4	1	1	3	1	4	4
655	1	1	1	1	3	3	3	1	4	3	1	2	1	1	3	1	2	1	4	4	2	4	1	4	4	4	1	3	4	4	3	4	3	3	3	1	4	2	1	2	1	2	1	4	4	4	1	3	1
656	3	4	1	1	4	2	1	1	4	4	1	3	1	2	2	3	1	3	4	1	2	2	1	2	2	4	1	4	1	2	1	1	1	3	3	4	1	4	3	1	1	1	3	4	1	2	1	4	1
657	1	2	4	4	1	3	4	1	1	1	4	1	4	1	1	3	4	2	1	1	1	1	4	2	1	4	1	2	4	4	4	4	2	1	3	2	3	1	2	4	1	1	2	4	2	2	1	1	1
658	1	1	1	2	3	1	1	4	4	3	4	1	1	4	1	1	3	1	1	4	2	4	4	1	1	1	3	1	1	1	2	4	1	1	3	1	2	1	1	4	1	4	4	2	1	3	4	2	1
659	3	4	1	2	1	4	4	1	4	1	4	2	3	1	1	4	1	2	3	4	1	1	4	1	2	4	2	4	4	2	2	1	2	4	4	1	1	4	1	1	1	2	3	1	4	4	1	4	4
660	4	4	4	4	4	1	1	1	3	1	2	3	4	1	2	2	1	1	1	1	2	1	4	1	4	1	1	1	2	2	1	4	4	4	1	1	1	4	1	1	2	1	2	4	2	1	1	4	1
661	2	4	2	3	1	2	3	1	4	1	4	2	1	2	1	1	1	3	1	1	2	3	3	4	4	4	1	1	2	2	2	4	2	3	1	4	1	1	3	1	2	2	1	2	2	4	2	1	4
662	4	4	4	3	1	2	1	3	1	2	1	4	1	4	1	4	1	3	1	1	2	3	4	4	4	4	2	2	1	3	4	2	1	3	3	3	1	1	1	2	2	4	1	3	1	1	2	1	2
663	1	2	1	1	2	1	4	1	1	1	4	4	4	4	4	3	4	4	4	1	4	1	3	4	4	3	4	4	3	4	4	1	2	4	1	1	4	3	3	4	3	1	1	1	3	1	1	3	1
664	4	4	1	3	3	1	1	2	4	1	1	3	4	1	1	1	1	1	1	3	1	1	3	4	1	2	3	1	4	4	4	4	2	2	1	4	2	2	2	2	4	1	3	4	3	1	2	1	1
665	1	2	3	1	4	4	1	1	4	2	2	1	4	1	2	1	4	4	3	2	4	1	1	1	4	3	1	3	3	1	4	1	1	2	4	2	4	1	4	4	1	1	1	4	1	4	1	1	4
666	1	2	1	1	1	4	4	2	3	3	1	4	1	1	1	1	1	1	3	4	2	2	2	2	3	1	1	1	4	1	4	1	1	3	4	4	1	1	3	4	1	1	1	2	2	4	2	2	4
667	1	2	1	4	4	4	1	3	4	4	1	1	4	1	1	1	2	1	1	3	4	3	1	1	1	2	1	1	2	4	4	1	1	1	2	1	4	1	4	4	2	1	2	4	4	1	1	4	1
668	4	3	3	1	4	3	1	1	4	1	2	1	1	1	1	1	4	3	1	2	1	4	1	4	1	1	2	1	1	1	1	1	4	1	4	4	4	2	1	2	2	1	4	4	1	4	4	1	3
669	1	1	1	4	2	2	2	2	1	4	4	3	4	4	1	3	2	1	4	1	3	2	4	3	2	1	3	2	1	4	1	3	2	4	2	1	1	3	2	1	2	4	3	2	4	1	3	3	1
670	3	1	1	4	1	1	3	1	1	4	1	1	2	1	1	4	1	1	3	1	1	4	1	1	2	1	1	4	1	1	3	1	1	4	1	1	2	1	1	4	1	1	3	1	1	3	1	1	3
671	4	4	3	2	2	4	2	2	4	4	2	4	2	2	1	4	1	1	1	1	4	1	1	1	1	3	1	1	4	1	3	4	4	4	2	1	4	4	4	1	2	1	1	4	3	4	1	1	1
672	1	1	4	4	2	4	4	2	1	4	1	4	1	4	4	3	1	4	1	3	1	4	1	3	1	2	2	1	1	2	1	2	2	1	1	4	4	2	1	3	4	1	4	4	4	1	2	1	2
673	2	4	4	2	2	4	1	1	1	1	1	1	4	1	3	1	2	1	4	2	2	1	2	4	1	1	1	1	1	2	4	1	4	4	1	3	1	2	2	3	4	1	4	3	4	3	1	4	1
674	1	2	1	1	2	1	4	4	1	4	1	1	2	3	3	4	1	4	1	3	3	1	1	2	4	1	2	1	1	1	1	1	1	4	1	1	2	1	3	4	1	1	2	4	4	4	3	1	4
675	2	1	3	1	4	4	4	1	3	4	1	1	2	4	1	4	1	3	2	4	3	4	2	1	4	2	1	1	3	4	1	2	1	3	2	1	2	1	4	4	1	4	4	1	1	1	1	1	2
676	2	1	1	2	4	4	3	1	2	4	4	2	1	1	4	4	1	1	1	4	1	2	4	3	4	1	2	2	2	1	2	4	1	2	4	4	1	4	1	3	1	1	4	1	4	4	1	3	4
677	1	1	1	1	1	1	4	1	4	4	2	2	1	2	2	2	1	4	1	2	1	1	1	4	2	1	4	1	1	4	1	1	4	4	1	2	1	1	2	4	3	1	1	2	1	4	1	2	1
678	2	1	2	1	2	4	4	1	1	4	1	2	1	2	4	4	2	1	1	1	4	1	2	2	4	4	4	4	1	1	4	3	1	1	2	4	2	4	1	4	2	3	1	1	4	1	3	4	4
679	4	1	2	1	1	1	1	1	4	1	2	2	4	2	1	1	4	1	4	2	1	1	1	2	4	1	4	4	2	1	1	1	2	1	2	3	4	1	4	2	3	1	1	2	4	2	4	4	1
680	2	1	1	2	4	4	4	1	4	4	2	1	1	1	1	4	2	2	1	2	4	1	1	2	1	1	3	1	2	1	4	4	1	4	1	4	1	2	1	4	4	3	4	4	2	4	1	2	1
681	4	3	1	1	2	1	2	1	1	1	2	4	1	4	4	4	2	1	1	1	4	2	3	3	1	4	4	4	2	1	1	4	1	1	1	1	1	2	2	2	2	2	2	1	1	3	4	1	1
682	2	4	4	4	2	2	2	4	2	2	1	4	2	3	1	2	2	1	1	3	1	4	4	4	4	4	1	2	1	1	1	2	1	1	3	4	1	1	2	2	1	4	1	4	1	2	1	1	2
683	4	4	4	1	1	4	3	4	1	1	2	1	1	1	1	2	4	1	1	2	1	2	1	4	1	2	1	1	1	4	1	1	1	1	1	1	1	4	1	1	1	4	2	4	1	1	4	4	2
684	1	1	4	1	1	4	2	1	2	2	2	2	3	1	1	2	2	1	1	2	1	1	1	1	2	2	4	1	1	1	1	1	1	2	4	1	2	1	2	4	2	4	4	4	4	1	1	4	1
685	2	1	1	1	3	4	1	1	1	2	4	1	4	4	4	1	1	4	1	3	4	2	3	4	2	4	4	2	1	1	2	3	1	1	2	4	1	1	1	4	1	3	2	4	1	4	1	4	4
686	4	1	4	1	4	4	2	3	4	3	1	4	4	4	1	2	3	1	1	2	1	1	3	1	2	2	4	1	1	2	2	4	4	4	3	4	1	1	1	1	1	4	2	2	1	4	2	2	1
687	1	4	4	3	1	1	2	1	2	2	4	2	1	3	1	2	1	4	2	2	4	1	4	4	2	2	3	1	1	1	4	2	4	2	2	1	1	3	1	1	2	4	1	1	4	4	1	1	2
688	2	1	4	1	4	4	1	1	1	4	1	1	2	1	1	1	1	1	2	4	2	4	4	3	4	2	4	4	1	1	4	1	1	1	2	3	4	1	4	4	2	1	4	1	4	1	2	4	4
689	1	1	2	4	1	1	1	4	1	4	2	1	2	4	2	3	2	1	2	2	2	2	1	4	2	4	4	1	1	2	1	1	1	4	2	1	2	4	4	4	1	1	4	4	1	1	2	4	1
690	1	4	4	4	4	2	1	2	1	1	3	2	1	1	1	1	2	4	2	2	1	4	4	4	1	4	4	3	1	2	3	1	1	3	1	1	4	1	1	4	2	4	2	2	1	2	3	1	1
691	2	4	4	4	1	2	4	4	1	4	2	4	4	2	1	3	1	2	1	2	2	2	4	4	2	3	1	1	1	4	2	2	3	1	2	1	1	1	2	4	3	4	3	4	1	1	4	2	4
692	3	4	2	2	1	2	1	1	4	2	2	2	3	4	1	2	1	1	1	3	1	1	4	3	1	1	2	1	1	1	4	4	4	2	4	2	1	2	2	2	2	2	1	4	1	4	1	4	4
693	1	4	1	1	4	4	4	3	3	1	4	2	1	3	1	3	1	1	2	3	3	1	1	4	1	4	2	2	1	2	4	4	2	4	1	1	1	1	1	2	2	2	1	4	1	4	4	2	2
694	4	1	4	1	4	4	4	2	2	1	1	4	2	2	3	1	4	4	1	4	4	4	1	1	1	2	1	1	1	3	4	4	2	1	1	2	2	1	2	1	1	4	2	2	1	4	1	2	1
695	1	1	1	3	1	2	1	1	1	4	1	4	1	4	3	1	4	1	2	3	1	2	1	2	1	4	4	1	3	1	1	1	1	4	1	2	4	4	2	2	4	1	1	4	2	1	1	4	1
696	1	2	2	1	1	2	4	3	1	2	1	1	3	1	2	1	2	4	4	3	4	4	1	2	1	1	3	2	4	1	1	2	2	1	2	1	2	4	3	4	4	2	1	2	1	1	4	2	1
697	1	2	4	2	3	2	1	4	1	4	4	1	2	4	1	1	4	1	2	2	1	1	2	4	4	4	4	1	4	1	2	3	4	2	2	4	1	2	1	2	4	4	4	1	4	2	1	2	4
698	3	4	1	1	1	1	2	1	2	4	2	4	2	1	1	1	1	4	4	2	3	2	1	3	1	1	4	1	1	1	1	2	1	2	2	4	2	4	1	4	1	1	2	1	1	4	2	2	1
699	1	1	1	4	2	1	4	1	1	1	4	2	3	4	4	3	4	2	4	1	1	1	4	4	1	4	1	4	1	3	1	2	1	4	2	1	4	1	4	2	4	2	1	1	1	2	4	4	3
700	4	4	1	4	1	2	3	1	2	1	2	3	2	1	2	2	1	1	2	1	2	4	4	1	2	1	1	4	1	4	4	1	2	1	4	4	4	1	2	1	1	1	3	4	1	1	1	2	1
701	4	1	4	4	1	1	1	1	1	1	4	1	1	1	3	4	3	2	1	2	2	1	1	1	4	2	4	4	1	2	1	1	2	1	1	1	4	1	4	1	1	2	4	2	1	1	1	1	4
702	1	3	1	2	4	4	4	1	2	1	2	1	2	4	4	1	3	1	1	1	1	4	1	4	3	4	4	4	4	1	2	4	1	4	1	1	1	4	4	1	4	4	2	4	4	2	1	1	2
703	4	3	4	3	1	1	1	1	1	4	2	1	1	1	1	4	1	1	2	2	1	2	2	3	2	4	4	2	4	1	4	4	2	3	4	4	1	3	1	4	4	4	4	4	1	2	1	4	4
704	1	4	1	2	2	4	2	2	3	4	4	4	1	2	2	3	4	1	2	2	2	1	4	2	2	1	1	1	1	1	2	3	1	2	2	1	3	1	4	1	1	1	4	2	4	4	4	2	2
705	4	1	4	2	1	4	1	1	1	4	4	3	2	3	1	1	1	4	4	4	1	1	2	4	4	1	4	1	1	4	2	3	3	1	4	2	3	1	3	1	1	1	3	3	2	1	1	2	2
706	4	4	4	2	1	1	1	2	1	2	1	4	1	4	4	1	2	1	2	1	1	1	4	4	1	2	1	1	3	1	2	1	1	1	1	4	1	4	3	3	3	1	1	2	1	2	3	1	2
707	4	4	4	2	2	1	4	4	3	3	3	1	4	2	4	3	1	1	2	1	3	1	4	4	4	3	4	2	4	4	2	3	1	2	2	2	1	1	1	3	1	1	4	4	4	2	2	1	4
708	3	2	4	4	3	1	1	2	4	4	4	1	4	4	4	4	4	4	1	3	1	2	4	4	1	3	1	1	1	1	3	4	4	1	4	4	1	2	1	2	1	1	3	4	3	1	1	1	2
709	3	3	3	1	1	2	4	1	4	4	4	1	3	4	4	1	4	4	2	1	1	1	1	3	2	4	4	1	1	1	1	1	4	3	4	1	3	4	4	1	2	4	2	4	4	1	1	4	2
710	4	4	3	3	4	3	1	1	1	2	4	4	3	4	3	2	4	4	2	1	1	3	4	2	2	1	4	2	1	1	1	4	3	2	2	3	4	1	4	2	1	4	2	3	1	2	1	2	4
711	1	1	4	4	3	4	1	1	1	1	1	3	4	4	3	2	2	1	2	4	1	3	3	3	3	1	1	1	1	4	1	2	1	2	1	1	3	2	1	1	4	1	4	4	3	1	4	4	2
712	1	2	1	2	2	1	3	2	1	1	2	4	1	3	1	3	2	1	1	1	1	2	4	1	4	4	4	3	3	4	1	4	3	2	1	1	1	2	1	1	1	1	1	2	4	2	2	1	1
713	3	1	1	3	4	1	1	1	4	1	1	4	3	3	1	1	3	4	3	1	4	1	2	4	1	3	1	1	1	4	1	2	1	1	4	4	4	1	4	2	1	4	2	3	1	2	4	4	2
714	4	2	4	1	4	4	1	2	1	1	2	4	3	1	2	2	3	1	2	2	1	2	2	4	2	2	1	2	2	4	2	3	4	1	1	1	1	3	1	2	2	4	3	4	1	4	1	3	4
715	1	1	4	1	1	1	1	1	3	4	3	4	1	1	1	2	4	1	1	3	1	1	4	1	1	1	4	2	3	4	1	2	1	4	2	3	3	4	4	1	1	1	2	3	1	1	1	1	4
716	2	4	2	1	3	1	1	1	4	1	2	1	1	1	4	4	2	4	2	1	4	1	1	4	1	2	4	2	2	1	2	4	4	4	4	1	2	4	4	1	1	4	2	3	1	2	4	4	4
717	1	2	2	2	4	1	1	1	4	1	1	1	1	2	1	3	1	1	1	1	4	2	2	4	3	2	4	1	2	1	1	4	4	1	1	1	2	1	1	1	2	3	2	2	1	2	1	1	3
718	3	4	1	1	3	1	2	3	4	3	1	1	2	1	4	1	1	1	3	1	4	2	2	1	1	4	4	4	4	2	1	1	1	1	1	4	2	2	1	2	1	4	1	4	1	1	2	1	1
719	1	1	2	2	1	1	4	2	3	4	4	4	1	2	2	4	4	2	3	1	1	2	2	1	4	4	4	3	3	2	2	1	4	1	1	1	4	1	4	4	1	3	2	1	1	1	2	1	2
720	4	2	3	4	3	1	2	1	4	1	2	4	3	1	1	3	4	2	4	1	3	1	1	1	3	1	1	2	3	2	2	2	1	1	1	4	2	3	4	2	4	4	1	3	4	2	3	1	1
721	2	1	1	1	4	1	2	3	1	1	1	1	1	2	1	1	4	2	2	2	3	4	1	1	2	1	2	4	4	2	3	1	1	1	1	4	2	4	3	4	4	4	4	1	2	4	1	4	2
722	1	2	4	2	4	4	4	4	2	4	1	1	3	4	3	4	3	1	1	1	1	1	4	2	1	1	1	1	4	1	1	2	2	2	2	4	2	1	1	4	1	1	1	4	2	4	3	1	1
723	1	2	1	4	2	2	3	1	1	1	1	1	2	2	2	4	4	1	4	4	2	4	4	2	2	1	4	2	1	1	3	2	4	1	1	2	1	4	1	1	1	4	4	1	4	4	3	4	4
724	2	1	1	1	4	2	4	4	1	1	1	1	3	1	1	1	1	1	2	3	1	2	1	1	4	4	1	4	4	1	2	3	4	1	1	1	2	1	4	2	1	3	1	1	2	1	4	1	3
725	1	4	1	2	1	4	1	1	1	2	4	4	2	1	1	2	1	1	2	4	4	1	4	1	1	1	2	2	1	4	1	3	4	1	2	1	1	2	4	3	1	1	1	1	1	1	4	2	1
726	4	2	4	2	1	4	2	2	1	2	2	1	1	4	4	2	1	1	1	4	1	4	2	1	4	1	1	4	1	3	1	3	1	1	1	4	4	4	1	4	1	1	4	1	3	1	4	2	4
727	1	4	1	2	3	2	1	4	1	3	1	3	3	1	1	4	1	3	4	1	1	1	4	2	1	3	4	4	4	2	1	2	2	2	4	1	2	2	2	4	4	1	2	4	3	1	1	2	1
728	4	4	4	4	4	3	1	2	1	1	2	1	1	2	1	4	4	1	1	2	1	3	1	2	4	1	4	3	1	1	2	1	2	3	4	1	1	1	2	1	3	1	4	4	1	2	1	1	3
729	1	4	2	1	3	4	1	4	1	2	4	1	1	3	1	1	4	4	4	1	1	4	4	1	1	2	1	1	2	4	2	4	4	2	3	2	1	1	3	1	1	1	4	4	1	4	4	4	1
730	3	1	4	4	4	4	4	1	1	1	4	1	1	3	4	3	4	1	1	1	2	1	2	1	4	4	2	3	1	2	3	4	4	1	4	4	4	1	4	4	4	2	1	4	2	4	4	1	4
731	3	4	1	3	1	4	4	1	2	1	1	4	3	4	4	2	3	2	1	3	4	4	1	2	3	1	1	4	4	4	2	4	4	4	1	4	1	3	4	3	4	3	1	1	1	1	1	2	1
732	4	4	2	3	4	1	4	1	4	4	1	1	1	2	3	4	4	2	1	4	4	1	3	1	1	3	1	1	2	4	3	1	4	1	4	1	3	4	3	1	4	4	3	1	1	4	3	2	1
733	1	4	1	1	1	4	4	4	1	1	4	1	4	1	3	1	1	1	4	2	4	3	4	1	1	1	1	1	4	2	1	1	1	4	4	1	1	4	1	4	1	3	1	1	2	1	2	1	3
734	1	1	1	4	4	2	3	4	2	3	4	4	4	2	2	4	4	2	2	4	4	4	2	1	2	4	2	2	1	1	4	2	1	1	4	2	1	3	2	1	1	4	1	4	3	1	4	3	4
735	1	3	1	1	2	2	1	4	2	3	1	2	1	1	1	1	2	2	1	1	2	1	1	2	3	4	1	1	4	4	3	4	1	1	2	4	4	4	1	4	4	1	3	1	2	1	2	4	4
736	3	4	1	1	1	2	4	2	1	1	1	2	1	4	2	1	3	1	1	2	4	1	3	1	1	2	1	3	4	1	1	2	1	4	2	4	4	4	1	1	1	1	2	4	1	3	1	2	3
737	4	1	1	3	4	1	1	4	2	3	4	3	4	4	2	2	1	1	1	4	2	1	4	1	4	1	1	1	1	3	1	2	2	3	1	2	1	1	2	1	4	2	4	1	1	2	1	1	2
738	1	4	1	3	4	4	4	2	1	1	1	2	1	1	1	1	2	3	1	4	2	1	1	1	4	4	2	1	4	1	4	1	1	1	4	1	1	4	4	4	4	2	4	4	2	1	4	1	1
739	1	4	2	1	4	1	1	2	4	4	1	1	1	1	2	1	4	1	2	4	4	4	4	1	1	1	2	1	1	3	1	4	1	4	2	2	1	1	2	1	1	1	1	1	2	2	4	3	4
740	4	4	1	2	4	1	4	1	2	1	4	1	1	1	1	1	1	4	2	2	2	4	4	2	1	4	1	1	1	1	1	2	3	4	4	1	1	1	1	1	2	1	2	1	1	1	4	1	4
741	1	4	2	2	3	4	4	4	2	1	1	1	4	1	1	1	1	2	2	4	1	1	3	4	4	1	1	3	4	2	1	4	4	4	4	2	1	2	2	1	3	3	3	1	1	4	2	1	1
742	2	1	3	1	1	1	1	4	3	1	1	1	1	4	2	2	2	4	3	4	1	4	1	2	1	4	1	4	1	2	4	4	1	4	4	1	1	2	1	1	4	2	4	1	1	3	1	4	4
743	1	2	4	1	2	2	4	1	3	4	3	1	4	2	4	2	1	3	4	1	4	4	2	2	3	4	1	2	1	2	1	1	2	2	1	2	1	1	2	4	1	1	1	4	1	1	4	1	1
744	4	4	4	1	1	1	3	4	1	2	4	4	1	2	2	1	2	2	1	1	4	1	1	3	4	4	1	4	2	1	1	2	1	4	4	4	4	4	4	4	1	4	4	2	1	3	4	1	4
745	4	4	1	4	4	4	2	4	1	4	1	4	4	1	2	3	1	1	1	4	4	1	4	2	4	2	1	1	1	1	1	4	3	2	3	1	4	1	4	1	4	1	1	1	1	1	1	4	3
746	4	1	1	1	1	4	1	4	1	1	1	4	1	4	4	3	4	2	4	1	2	2	2	2	1	1	1	1	2	1	4	4	1	4	1	4	1	4	3	1	4	3	1	1	1	4	1	1	1
747	1	3	1	2	1	1	4	2	2	4	4	2	2	4	4	2	4	2	1	1	1	4	4	4	4	1	2	1	1	1	1	1	4	2	4	4	1	4	1	2	4	1	3	2	1	1	1	4	4
748	1	4	1	3	3	3	3	2	3	4	4	4	1	4	1	1	1	2	4	1	1	1	1	2	3	1	4	1	4	2	4	1	2	2	4	2	1	4	1	1	3	2	1	4	1	3	1	1	3
749	3	1	2	1	2	4	2	2	1	2	1	1	4	4	2	1	1	4	2	4	3	4	4	2	3	4	1	3	2	1	3	4	4	1	4	2	2	1	2	1	1	4	4	4	3	3	4	1	1
750	4	1	1	1	1	1	4	4	2	2	3	4	2	2	1	2	1	1	2	2	1	2	1	4	4	2	4	1	1	1	4	4	1	4	2	4	4	4	1	1	3	1	4	3	4	1	4	1	1
751	1	2	1	3	4	1	1	1	1	2	1	1	3	1	4	4	2	2	1	2	3	1	2	2	4	1	1	2	1	1	1	4	3	1	1	1	2	3	2	4	1	2	1	3	4	4	4	2	1
752	1	1	2	2	1	4	4	1	1	1	1	1	1	4	1	3	4	3	4	2	1	1	1	4	1	3	4	1	4	1	1	3	4	4	2	1	4	4	2	1	4	2	1	4	4	4	1	1	1
753	4	4	1	1	1	4	4	4	2	2	1	2	1	4	2	1	1	4	1	4	4	2	4	3	4	1	2	3	4	1	1	4	4	1	3	1	1	4	2	1	1	2	1	1	2	1	4	1	2
754	4	2	2	1	1	2	3	1	3	1	4	4	1	4	3	4	4	4	4	1	2	1	2	3	1	2	2	1	4	2	1	1	4	1	4	1	3	4	2	2	1	4	2	4	4	1	4	1	4
755	1	1	3	2	1	4	4	4	1	1	1	1	1	1	2	1	4	4	2	2	2	1	1	1	1	4	2	2	4	1	1	4	4	2	4	2	1	4	2	2	2	2	1	1	2	3	3	4	2
756	3	1	2	1	4	2	1	4	2	1	1	1	4	4	2	1	2	1	4	1	1	4	4	2	1	2	1	1	2	3	4	1	1	2	2	2	1	2	2	2	4	4	1	1	1	4	1	4	2
757	4	1	1	1	1	4	2	1	1	1	1	1	1	1	2	1	4	4	1	1	4	4	3	1	4	1	1	1	1	1	2	4	2	4	2	1	4	2	1	1	1	2	1	4	2	4	2	4	3
758	4	2	4	1	1	4	4	1	2	3	1	1	4	1	1	3	3	4	4	1	4	1	1	3	4	4	2	4	1	1	4	2	4	2	4	2	4	1	2	2	1	4	2	3	1	1	1	4	1
759	4	2	2	1	4	1	1	1	2	4	1	4	2	4	2	1	1	2	1	2	1	1	3	4	1	4	1	1	2	1	1	1	4	4	1	1	2	1	1	2	4	1	1	1	4	1	2	1	1
760	1	2	2	4	1	1	2	4	4	4	2	4	2	1	1	4	2	1	1	1	3	4	1	2	1	1	4	2	4	4	1	4	1	2	2	3	4	4	2	1	3	4	4	1	4	1	1	1	1
761	1	1	4	2	2	3	4	1	1	4	1	4	1	4	1	4	4	2	4	2	1	1	1	1	4	4	1	4	1	1	4	4	2	4	1	1	1	1	1	3	4	1	3	4	4	4	2	1	1
762	2	3	4	4	2	1	1	1	2	1	1	4	4	2	1	1	1	4	4	1	1	4	1	1	3	4	4	3	1	1	1	2	1	1	4	2	3	2	1	1	1	2	3	4	1	4	3	4	4
763	4	2	1	2	3	4	1	4	1	4	2	1	1	4	4	1	2	1	1	1	1	3	2	2	1	4	1	4	1	3	4	1	4	1	3	1	4	3	3	4	1	1	1	2	1	4	4	4	2
764	1	1	2	4	1	1	1	2	1	4	4	1	4	4	3	4	2	4	4	2	1	1	2	4	4	1	3	4	3	1	4	1	4	4	3	3	1	1	3	4	2	2	4	1	4	4	1	3	1
765	4	4	3	4	1	3	1	1	1	4	1	2	4	1	4	4	4	4	1	1	1	1	1	1	4	1	1	1	1	1	4	1	1	2	4	2	4	4	4	2	2	1	1	2	3	4	3	4	1
766	1	1	3	1	1	1	1	1	4	1	1	1	3	4	3	4	3	1	3	4	4	1	2	1	2	3	4	1	2	1	1	2	1	4	4	4	1	3	2	3	4	1	1	1	4	1	2	2	1
767	2	1	1	1	3	2	1	1	2	1	1	2	1	4	2	3	1	2	4	4	2	2	4	2	4	2	2	4	1	1	2	4	4	1	4	4	4	4	1	4	3	4	4	2	1	1	2	1	1
768	4	2	4	4	4	1	4	4	2	4	4	2	4	1	1	1	2	1	1	4	2	4	1	2	2	1	1	2	1	1	2	2	3	4	1	1	2	1	1	2	2	4	2	1	1	1	1	1	1
769	3	4	4	2	4	1	1	4	1	2	1	4	2	2	1	2	1	1	3	3	1	2	4	4	2	2	4	1	1	1	2	1	1	1	2	1	3	3	4	1	2	1	4	4	4	1	1	3	4
770	1	2	2	1	3	3	4	1	4	1	3	1	3	3	1	3	1	2	1	1	1	1	3	4	1	1	2	2	1	3	4	1	4	2	1	1	2	1	1	4	4	1	1	4	1	1	1	1	4
771	4	3	4	1	1	1	2	4	4	1	2	1	3	1	4	4	1	4	4	4	4	1	3	4	2	2	1	4	1	3	1	4	1	1	1	1	1	4	2	1	3	4	4	4	1	1	2	1	4
772	1	4	1	2	3	1	1	1	1	1	2	4	1	1	3	1	2	4	1	1	1	1	1	2	1	4	4	1	1	1	2	1	2	3	1	2	1	1	1	1	2	1	1	1	4	1	1	4	2
773	1	1	4	1	1	1	1	1	1	3	3	1	2	1	4	1	4	4	2	1	4	1	1	4	2	4	2	2	4	3	1	1	2	1	4	4	1	4	1	2	3	4	2	1	4	4	3	1	3
774	2	3	4	4	1	4	1	1	1	2	1	4	2	1	4	1	3	2	3	1	2	1	4	4	2	4	4	2	1	2	2	4	4	2	4	1	2	3	4	1	2	4	1	1	1	4	1	4	4
775	3	3	1	1	2	1	2	4	4	2	1	2	2	4	4	1	4	1	4	4	1	2	1	1	2	1	4	2	4	4	1	4	4	4	1	1	3	3	1	1	3	2	2	1	1	1	1	1	4
776	1	4	4	1	2	2	4	1	3	4	3	1	2	4	4	4	4	4	3	1	4	1	1	1	1	1	4	2	4	2	1	1	1	1	1	2	3	4	2	1	1	4	1	2	1	2	1	1	4
777	4	1	1	1	2	2	1	2	1	2	1	4	1	1	1	4	4	1	4	2	1	1	4	2	1	1	1	1	4	1	4	1	1	1	4	1	1	1	2	1	1	1	4	1	1	3	1	2	4
778	4	1	2	1	1	1	4	3	2	1	2	2	2	1	1	4	2	1	1	1	4	4	4	3	1	4	1	1	3	1	4	4	2	1	2	2	2	4	2	2	1	4	4	4	2	2	1	2	1
779	3	1	1	4	2	3	4	1	2	4	1	1	1	1	2	1	4	1	4	1	2	3	4	2	1	2	1	4	1	3	1	4	1	1	4	1	2	1	2	1	1	4	3	4	1	2	1	3	1
780	4	4	1	4	1	1	1	4	1	1	2	1	1	4	1	2	1	1	1	1	1	2	1	4	4	4	1	1	1	2	1	4	2	2	1	1	1	1	2	1	4	1	4	1	4	4	1	2	1
781	4	3	2	2	4	4	4	2	2	1	3	2	1	4	1	3	3	1	1	1	1	4	1	1	1	1	2	1	1	4	4	1	2	2	1	4	4	4	1	3	4	3	1	1	3	1	1	4	3
782	1	4	1	2	1	2	2	2	4	4	1	1	1	1	1	1	3	1	1	1	2	2	2	4	4	1	4	4	1	4	3	4	2	2	2	1	4	4	4	1	4	1	4	1	4	4	1	4	3
783	1	4	2	3	1	1	1	1	4	4	1	4	4	1	1	1	1	1	4	1	4	4	1	2	1	1	2	1	4	2	1	4	1	4	1	2	3	4	4	2	2	2	1	1	4	4	1	4	1
784	4	4	2	1	4	2	2	1	4	1	4	4	4	3	4	3	4	1	4	2	1	2	1	1	1	1	2	1	1	3	4	1	1	1	4	1	1	4	3	3	4	3	4	4	4	4	1	1	2
785	1	2	4	4	1	3	1	1	2	3	4	1	4	1	4	4	4	1	4	2	3	4	1	2	1	4	1	1	2	1	1	1	3	1	1	2	1	1	2	4	3	4	4	1	2	1	1	1	3
786	1	4	2	4	4	1	1	4	2	1	2	1	1	2	4	4	1	2	1	2	1	1	3	4	4	4	1	4	2	2	1	4	2	1	4	2	3	1	3	3	1	4	4	1	4	4	3	1	1
787	1	2	4	2	4	1	4	4	2	4	4	1	1	1	2	1	2	2	4	4	1	1	2	1	2	1	2	4	1	2	3	1	1	3	1	1	1	1	4	3	1	3	4	4	2	2	4	2	2
788	1	2	2	3	4	4	1	4	1	1	1	1	1	4	1	1	1	4	3	4	4	4	1	1	2	1	2	2	4	1	1	1	2	4	4	4	1	4	1	2	4	2	1	4	1	4	1	4	1
789	1	1	3	2	1	2	1	1	4	4	4	2	2	1	2	4	1	2	1	4	1	2	4	4	1	4	1	1	2	2	3	4	1	4	1	1	1	2	3	2	4	4	2	4	3	1	1	4	4
790	4	1	2	1	2	1	4	4	2	4	1	1	1	4	1	2	4	4	1	4	1	1	2	4	4	1	3	3	4	1	4	1	2	4	2	4	4	4	2	1	1	2	1	1	2	1	1	1	4
791	1	4	1	2	4	3	1	1	4	4	1	4	3	1	1	4	4	2	4	2	1	2	4	4	1	1	2	1	3	1	2	2	1	1	4	1	2	1	4	4	4	4	4	3	4	3	3	4	4
792	1	3	3	4	2	3	1	1	4	1	2	4	4	1	1	4	4	1	1	1	1	2	1	2	1	1	1	1	2	2	1	2	4	2	3	4	4	4	3	1	3	1	3	4	3	3	1	3	4
793	4	1	1	1	2	3	4	4	4	4	1	4	3	3	1	1	2	1	4	4	1	4	4	1	4	1	1	3	1	4	1	1	1	3	1	2	2	1	2	4	2	4	2	1	1	1	2	4	1
794	1	4	4	1	1	4	1	1	1	1	1	1	2	1	1	3	4	1	4	4	4	1	1	1	1	1	1	2	4	1	2	1	1	2	2	4	1	2	1	3	4	1	3	1	4	3	1	4	4
795	1	2	4	2	3	1	2	1	1	1	4	4	1	1	1	1	1	4	3	4	4	2	1	1	4	4	1	2	1	4	1	4	1	2	1	1	1	2	4	1	2	1	2	1	1	1	1	4	2
796	4	2	4	1	1	2	2	3	4	1	4	3	2	2	2	4	1	4	2	2	4	2	1	1	1	1	1	2	4	1	1	2	4	3	3	1	1	3	1	4	1	4	2	3	4	4	4	4	1
797	2	1	2	1	1	4	2	1	2	1	4	4	1	4	1	1	1	1	1	1	1	2	1	1	1	2	1	2	1	4	1	4	4	2	3	4	1	2	1	4	4	1	1	1	1	1	1	1	3
798	1	1	1	2	1	1	1	4	1	2	1	1	1	1	2	1	1	2	1	1	1	1	4	1	2	1	1	1	1	4	2	3	1	3	4	4	1	3	1	4	2	3	4	4	1	2	1	4	1
799	3	1	4	4	4	4	4	4	4	1	1	1	3	4	2	4	4	4	4	1	4	1	1	4	1	2	3	1	2	1	1	4	2	1	1	1	1	1	4	1	2	4	1	4	2	2	4	4	4
800	2	1	1	1	4	2	1	1	3	4	3	1	2	1	4	1	2	2	1	1	1	1	3	1	4	2	4	1	2	1	4	2	4	2	4	1	1	2	2	2	1	1	1	2	1	4	4	1	2
801	1	4	2	2	1	4	1	4	2	3	4	4	4	1	4	3	3	1	1	2	1	1	4	4	1	1	2	2	1	1	1	1	4	2	1	1	3	4	3	3	3	1	4	4	1	4	4	4	1
802	1	4	4	3	3	3	3	1	2	4	4	4	4	4	3	3	3	3	1	2	1	1	1	4	4	3	3	3	1	3	4	4	4	1	4	4	3	3	3	4	1	3	4	4	4	3	4	3	3
803	1	1	1	1	1	1	2	3	1	4	2	1	2	1	4	1	1	4	1	2	4	1	4	4	2	4	2	2	1	1	1	4	1	1	1	2	1	4	4	4	3	3	3	4	3	4	3	1	1
804	4	2	1	3	4	1	2	2	2	4	4	1	1	2	2	2	1	4	4	2	3	3	3	4	1	2	4	3	1	3	4	1	4	2	1	1	3	1	2	1	3	4	1	2	2	3	1	2	2
805	3	4	2	4	4	1	2	4	4	3	1	1	4	4	3	4	1	1	3	4	1	4	2	4	4	3	1	1	4	3	4	4	4	1	2	4	4	4	4	4	3	4	1	4	4	4	3	1	1
806	1	4	1	3	1	3	4	1	1	1	1	1	1	4	1	2	4	1	4	1	4	2	1	1	4	4	2	1	2	1	4	4	1	1	1	1	4	3	4	3	1	4	1	3	1	1	4	4	4
807	4	3	1	1	1	2	1	3	4	1	1	1	1	1	3	3	2	1	2	4	2	2	2	2	3	4	4	2	2	4	1	1	3	3	4	3	1	3	4	3	1	3	3	1	4	2	3	1	1
808	1	4	3	4	1	2	2	4	4	3	2	1	4	4	3	3	4	2	2	1	1	3	4	4	2	3	4	3	3	3	4	4	4	1	1	4	1	1	4	1	4	2	4	1	4	3	3	3	3
809	3	4	4	1	2	1	4	4	1	1	3	4	4	3	4	1	2	2	4	3	4	4	4	4	4	4	1	1	4	1	3	1	1	1	1	1	4	4	4	1	4	4	1	1	1	1	1	4	2
810	3	4	1	4	4	3	1	2	1	4	1	4	2	3	1	4	2	4	3	1	4	2	3	1	4	2	4	3	4	1	1	1	2	4	3	2	1	1	4	1	4	4	4	1	1	4	1	4	4
811	1	1	1	4	4	2	1	2	2	2	2	4	3	2	1	1	1	1	4	1	1	1	1	1	3	1	2	2	1	2	2	4	1	2	4	1	2	4	1	4	2	4	4	2	1	1	1	1	4
812	1	1	1	1	4	2	4	1	1	1	1	2	4	1	1	4	2	4	2	2	4	3	3	1	1	1	1	1	4	2	2	1	2	1	1	2	1	1	2	4	4	4	2	2	4	4	4	1	1
813	4	1	2	2	1	2	1	2	2	1	1	3	4	1	2	2	3	1	4	1	2	4	1	1	1	4	1	4	4	3	2	4	2	1	4	1	3	1	4	4	1	1	2	1	1	1	4	1	4
814	1	4	1	1	1	1	1	2	1	1	1	4	4	4	1	1	4	2	1	2	4	3	4	1	3	4	2	4	3	2	2	1	2	1	4	4	3	3	4	1	3	1	3	4	1	2	1	1	1
815	1	1	4	4	2	3	3	4	1	1	3	4	4	3	2	2	4	1	3	4	1	3	4	4	4	4	2	4	4	1	3	1	2	1	1	2	1	1	2	3	4	2	4	2	4	1	3	1	1
816	2	1	1	2	4	1	1	4	1	1	1	3	3	1	2	1	1	2	3	1	1	1	2	4	4	1	4	4	4	1	3	1	1	1	1	4	2	2	2	4	4	1	3	1	1	1	1	1	3
817	4	4	1	2	1	1	4	1	3	1	4	2	2	4	4	1	4	4	1	4	1	4	4	2	3	4	1	3	1	2	1	1	1	1	1	2	1	3	3	1	2	2	1	1	4	2	2	3	4
818	3	1	2	1	1	2	2	3	1	1	1	1	1	1	2	4	1	1	2	1	1	1	1	2	1	4	4	4	4	1	3	1	2	1	4	2	1	1	1	4	1	3	1	1	2	1	2	4	4
819	3	4	1	3	4	1	2	4	3	1	1	2	2	4	1	2	3	1	1	4	1	1	1	3	3	4	3	1	2	1	4	2	4	1	4	4	1	4	1	1	1	3	1	4	4	4	4	1	3
820	2	1	1	1	1	1	1	1	4	4	1	2	2	4	1	4	4	3	3	1	1	1	1	2	2	4	2	4	2	1	1	1	1	2	1	2	1	4	2	1	2	4	4	1	1	1	4	3	1
821	4	4	2	1	4	1	4	1	3	1	1	2	3	1	3	4	4	2	1	1	1	2	1	1	4	4	1	4	1	4	3	4	1	4	2	1	1	1	4	4	1	3	3	4	1	1	2	4	4
822	1	4	1	4	2	1	1	4	4	1	4	1	1	1	2	1	2	2	4	1	4	1	4	1	1	1	1	1	2	1	4	4	1	1	2	2	1	1	4	4	1	1	4	1	2	1	1	1	4
[truncated: 11 more columns]

## Sheet: 归一化
DataPoint	1	2	3	4	5	6	7	8	9	10	11	12	13	14	15	16	17	18	19	20	21	22	23	24	25	26	27	28	29	30	31	32	33	34	35	36	37	38	39	40	41	42	43	44	45	46	47	48	49
1	0.333333	0.333333	0.333333	0	0.666667	1	0.333333	1	0.666667	1	1	0.333333	0	1	0.333333	0.333333	0	0.333333	0.333333	0.333333	1	0.666667	1	1	1	1	1	1	0	0	1	1	0.666667	0.666667	0.666667	0	0	0	0	0.666667	0.333333	0	0.666667	0	0	0	0.666667	0	0
2	0	1	0.333333	1	0.333333	0.666667	0	0	0.333333	0	1	0.333333	1	0.666667	0	0	0	0.333333	0	0	0	0	0.333333	0.333333	1	0	0	0	0	0.666667	0	0	0.333333	0	1	1	0	0.666667	0	1	0	0	0	0	0.333333	0.333333	1	0	1
3	0	0	0	1	0	1	0.666667	0	0.333333	0.666667	0	0	0	0.333333	1	0	1	0.333333	0	0.666667	0	1	1	0	0.333333	1	1	1	0	0	0	0.666667	0	0.666667	1	1	1	0	0	0	0.333333	1	0.666667	0	1	0.333333	0.333333	0	1
4	0	1	1	0.333333	0.333333	0.333333	0.666667	1	0	0.333333	1	0.333333	0	0.333333	0	0	0	0	0	0.333333	0	0	0.333333	0.333333	0.333333	1	0.333333	0.666667	0	0.666667	0.666667	1	0	0	0	0	0	1	0	0	0	0	0.333333	0	0.333333	0.333333	1	0.333333	0.666667
5	0	1	0	0	0	0	0	1	0.333333	0.666667	0.666667	0	0.666667	1	0.333333	0.333333	1	0.666667	0.666667	1	0.666667	0.666667	1	0.333333	0.333333	0	0	0	1	0	0	0	0	0	1	0.333333	0.666667	1	0.333333	0	0	0	0	0.333333	1	1	1	0.333333	0.333333
6	0	0	1	0	1	0.666667	1	0	0.666667	0.666667	1	0.333333	0	0	0.333333	0	0	0	0.666667	1	0	0.333333	0.333333	0.333333	0	0	1	1	0	0	1	0	0.666667	0	0	0.333333	0	0	0	1	0	1	0.666667	1	0	1	0	0	0
7	0	1	0	1	1	0.666667	1	1	1	0.333333	0.333333	0.333333	0	0	0.666667	0	0.333333	0	1	0	0	0.666667	0	0	1	1	0.666667	0	0	1	0	1	0.333333	0.666667	0	0.333333	0.666667	0	0	1	0	0	1	0	0	0.333333	0	0.333333	0.666667
8	1	0.333333	1	0	1	0.333333	1	1	0	0	0	0.333333	0	0.666667	0	0	0.333333	0.333333	0	0	0.333333	0	0	0	1	0.333333	0	1	1	0	0	0.333333	0.333333	0	0.333333	1	1	0	0	0	0.333333	0	0	0	0.666667	0	1	0.333333	0
9	0	1	0.333333	0.333333	1	0.333333	0	0.333333	0	0	0.333333	0	1	0	0.333333	0	0.333333	1	0	1	0.333333	0	0	1	1	1	0.666667	0	0	1	1	1	0.333333	0.666667	0	1	0.333333	0.333333	0.333333	0	1	0	0.333333	0.333333	0.666667	0	0	0.333333	0.666667
10	0	1	0.333333	0.666667	0	0.666667	0	0.333333	0	0.333333	1	0	0.333333	0.333333	0.333333	0.666667	1	0	1	0.333333	0	0.333333	1	0.333333	0	0.333333	1	1	0	0	0.333333	0.333333	0	0.333333	1	1	1	0	0	1	1	0	0	0	0.666667	0	0.333333	1	0
11	1	1	0.666667	0	1	0	0	0.333333	0.333333	0	1	1	0.333333	0.333333	0	0	1	1	1	0	0.333333	0.666667	1	0	0.666667	0	0.333333	0	0.333333	0.333333	0	0.333333	0.666667	0	0.333333	0	0	0	0	0	1	0	0.333333	0	0.333333	1	1	0.333333	0
12	0.333333	1	0.333333	0	0	0.333333	1	1	0.333333	0	1	0	0	0.666667	0.666667	1	0	0	0	0.333333	0	0	0	0	0.333333	1	0.333333	0	1	0	0.666667	1	0.333333	0.333333	0	0.333333	0	1	0.333333	0	1	1	0.666667	0	0	0	0	0	1
13	0.666667	1	0	1	0	0.666667	0	0	0	0	1	0	1	1	0.333333	0.666667	0	0	1	0.333333	0	0	0	0.666667	0.333333	1	0.333333	0.333333	1	0.333333	1	1	0	0	0.666667	0	0	1	0.333333	0.333333	0	1	0	0	0	0.333333	0.666667	1	1
14	1	1	0	0.333333	0	1	1	0.333333	1	1	0	1	1	0.333333	0.333333	0.333333	0	1	0	0	1	0.666667	0.666667	1	0.333333	1	1	1	0.333333	0.333333	1	1	1	0.333333	0.666667	0	0.333333	0	0.333333	0.333333	0	1	0	1	0.333333	1	1	0	0
15	0.333333	0	0.666667	0	0	0.333333	1	0.333333	0.333333	0.666667	0	0	1	0.666667	1	0.333333	0	1	0.333333	1	1	0.666667	1	0.333333	0	1	0.333333	0.333333	0.666667	1	1	1	0	0.333333	0.666667	1	0.666667	0	0	0	0.666667	0.666667	0.666667	0.666667	0	0	0	0	0.333333
16	0	0.333333	1	0.333333	0.333333	1	0.666667	0	0	0.333333	0.333333	0	0.333333	1	0	0.333333	0.333333	1	0	0	0	0	0.666667	1	0.333333	0.333333	0	1	1	0	0.333333	0	0	0	0.333333	0.666667	0	1	1	0.333333	0.666667	0	0	0.666667	1	0.333333	1	0	1
17	0	0.666667	1	0	0.333333	0	0.666667	0.666667	1	1	1	1	0.666667	0.666667	0.333333	0	0	0	0.333333	1	0	0.333333	1	1	0.333333	0.666667	1	0	0.666667	0	0.333333	0.666667	1	0.666667	0.666667	0	0	0.666667	0	0.666667	0.333333	0	0.666667	0	0	0.666667	0	0	1
18	0.666667	1	0	1	0.333333	0.333333	0.333333	0.666667	1	0.333333	0	0	0	1	0	0.333333	0.666667	1	0	0	0	1	0.333333	0.333333	0.666667	1	0	0	0.333333	1	0	0	1	0	0.333333	0.666667	0	0	0.333333	0.333333	1	1	0.333333	0	0.333333	0	0	0.333333	0.666667
19	0	0.666667	1	0	0	0	0	0.666667	0	0	0	0	0.333333	1	0.333333	1	0	1	0	1	0.333333	0	0	0	0.333333	0.333333	0.666667	1	1	1	0.333333	0	0	0.333333	0	0	0	0.333333	0	1	0.333333	0.333333	1	0.333333	0.333333	0.333333	0.666667	1	0
20	0.333333	0.666667	0	0.333333	1	0	0	0	0.333333	0.666667	0.666667	0.666667	0.333333	0	0.333333	0	0	1	0	1	0.333333	0.666667	0	0	0.333333	0.333333	1	1	1	1	0.666667	0	1	0.333333	0	0	0.333333	0	1	1	0	1	0	1	0.333333	1	1	0	1
21	0.333333	0	0	0.333333	0.666667	1	1	0.666667	0.333333	0.333333	0.333333	0	0.333333	1	1	0.333333	0.666667	1	0.333333	0	0.666667	0.666667	0.666667	0.666667	0	1	1	0	1	0.333333	0.333333	0	0	0.333333	0.666667	1	0	1	0	1	1	0.333333	0.333333	0.333333	0	0	0.666667	0	1
22	0.333333	0	0	0	0	1	0	0	0.333333	0.666667	1	1	0.666667	1	1	1	1	0	1	0.333333	0.666667	0.333333	0.333333	0	0	0	0.666667	0.666667	0.666667	0	0	0.666667	1	0	0.333333	0	0	0.666667	0.333333	0	0.333333	1	0.333333	0.333333	0	0	0.666667	0.333333	1
23	0.666667	0	1	0	0	1	0	0.333333	0	0.333333	0	0.666667	0	0.333333	0	0.333333	0	1	1	1	0	1	0	1	0	0	0	0	0.666667	0	1	1	1	0	0	0	0.333333	1	0	1	0.666667	1	1	0.666667	1	1	1	0	0.333333
24	0	0.666667	0	1	0.666667	0	0	0	0	0.333333	0	1	0	0	1	0	1	1	0.333333	0	0	0	1	0.333333	0.666667	1	0	0	0	0	0	0.333333	0	0	0	0.333333	1	0	0.666667	0.666667	0	1	0.333333	0	0	0.333333	0.333333	1	1
25	0.666667	0.333333	1	0.333333	1	1	0	0.333333	0	0.333333	1	1	0.666667	1	1	0.333333	0.333333	0	0.333333	0	0	1	1	1	0.666667	0.666667	0	0	0	0	0.333333	0.333333	1	0.333333	0	0	0	0.333333	1	0.333333	0	1	1	0.666667	1	1	1	0	0
26	0.333333	0.666667	1	0.333333	1	1	0.333333	0	0	0	0.666667	0	0	0.333333	0.666667	0	0.666667	0	0	1	0	0	0.333333	0	0.333333	0	0	0.333333	1	0.333333	0	0	1	0	1	0	1	0.666667	1	0	0	1	0.333333	0	0.666667	1	0	1	0
27	0.333333	0.333333	1	0.333333	0.666667	0	0.333333	0	1	0	1	0	0.333333	0.666667	0	0	0.333333	0	1	0	1	0.333333	0.333333	1	0.333333	0	0.666667	0.333333	0	1	0.333333	0	0	0	0.666667	1	0	1	0	0	1	0	0.333333	0.666667	1	0.666667	0.666667	0	0.666667
28	0	0	0	0.333333	1	0.333333	1	1	1	0.333333	0	1	1	1	0	1	1	0	0	0.666667	1	1	0	1	1	0.666667	1	0	0	0	0	0	0	0.333333	0	0.666667	0	0.666667	0	0	1	0.333333	0.333333	0	0	0	0.666667	1	0.333333
29	1	1	0	0	0.333333	0	0.333333	0.666667	0	0.333333	1	1	0.333333	0	1	0	0	0	1	1	1	0	0	0	0	0.333333	0.666667	0	1	0.333333	1	0	1	0.666667	0	1	0.666667	0	0	0	1	0.666667	0	0	0.666667	0	0.333333	0	0.333333
30	0	0.666667	0.333333	0.333333	0	1	0.333333	0	1	0.333333	0	1	0.333333	0.333333	1	1	1	0.333333	0.333333	0.333333	1	0.333333	0.666667	0	0.333333	0.333333	1	0.333333	1	1	0	0.666667	0	0.333333	0	0.666667	0	0.333333	0	1	1	0	0	0	0	0.333333	0	0.333333	0.333333
31	0.333333	0	0	0	0.333333	0	0.666667	1	0.666667	0	0	0	1	0	1	0.333333	0	0	0	1	1	0.333333	1	0	0.666667	0.666667	1	0	1	1	0.666667	0	0	0	0	1	0.333333	0.333333	1	1	0.666667	1	0	0.333333	1	0.333333	0.666667	1	0
32	0	0	0	1	0	0.666667	1	0	1	0	0	1	0	0	0	0.333333	0.666667	1	1	0.666667	1	0.333333	0	0	0	1	0.333333	1	0.333333	0.333333	0.333333	0	1	0	0	0.666667	0	1	0.333333	0	0.333333	0.333333	0.333333	0	0.333333	0.333333	0	0	1
33	1	1	0	0	0.333333	1	0.333333	0.333333	0.666667	1	1	0.666667	0	1	0	0.666667	0	0	0	0	1	0	0	0	0.333333	0	0	0.333333	0.666667	1	0	1	0	0	1	0	0.666667	0	0.333333	0.666667	1	1	0.666667	0.666667	1	0	0	1	0.333333
34	0	1	1	0	0	0.333333	0.666667	0	0	0.666667	1	0	1	0.666667	0	0	0	1	0	0.333333	0	0	0	0	1	0	1	0	0.666667	0	0.333333	1	0	0.333333	0	1	1	0.666667	0	0	0	0	0.333333	0.333333	0.333333	0	0	0	0
35	0	0.333333	1	0	0	0	0	0	0.333333	0.333333	0	0	0	1	0.333333	0	0	0	0	0	0	0	0.333333	0	0	1	1	0.333333	0.333333	0	0.333333	0	0	1	0.666667	0	0.666667	0.666667	0.666667	0.333333	0	1	0	0.333333	0	0.333333	0.666667	1	0.333333
36	1	0	1	1	0.666667	0.333333	1	1	1	0.333333	0.666667	0	0.333333	0	0	0	0	1	0	0	0.666667	0	0	1	0	0.666667	1	0.333333	0	1	1	1	0	1	0.666667	1	1	1	0	0.666667	1	0.333333	0	0	0	0.333333	0.333333	0.333333	0.333333
37	0.333333	0.333333	0	1	0	0	1	0	1	0.666667	1	1	0	1	0.333333	1	0	0	0	0	0	0	0.333333	0.666667	1	0	1	1	1	0	0	0	0	0.333333	0	0.666667	0.666667	1	0	0.666667	1	0.333333	0.333333	0	0.333333	0	0	0	1
38	0.666667	1	0	0.333333	1	0.333333	0.333333	0	0	0	1	0	1	0	0.333333	0.333333	0.666667	0.333333	1	0	1	0	1	0	0	0	1	1	0	0.333333	0	1	0.333333	0	1	1	0.666667	1	0	0.333333	0	0.333333	1	1	0.333333	0	1	1	0
39	0.333333	0	0.333333	0	0	1	1	0.333333	1	0	1	0.666667	0	0	0	0	0.666667	0	0	0	0	0	1	0.333333	0.666667	1	0	0	1	1	0	1	0	0	0	1	1	0	0.333333	0.333333	1	1	0.666667	1	0	0.333333	1	1	1
40	1	1	0.333333	1	0.666667	0	0	1	1	0.666667	0	0	0.666667	0	0	0.666667	1	0.333333	0.333333	1	1	1	1	0	1	0.333333	0.333333	0.333333	1	0.333333	1	0	0.666667	0.666667	1	0.666667	0	1	1	1	1	0.666667	0	0	0	1	0	0.333333	0
41	0.666667	1	0.666667	0	0	1	0	1	0	1	0	1	1	0	0.333333	0	1	0.333333	0	0	1	1	1	0.333333	1	1	1	1	0	0.333333	0	1	0	0	0.666667	0	0.666667	0	1	0.666667	1	0	0	0	0	1	0.333333	1	1
42	0.666667	0	0.333333	0	1	0	0.333333	1	1	1	0	0	0	0.333333	0.666667	0	0	0.333333	0.333333	1	0.333333	0	1	1	0.333333	1	1	0	1	0	1	1	1	0.333333	0.333333	0	1	0	0	0.666667	1	0	0.333333	0	0.333333	0	0	0.333333	0
43	0.666667	1	1	1	0	1	0	1	0.666667	0.666667	1	0.333333	0	1	0	0	0	0	0	0	0.333333	1	1	0	0.333333	0	1	1	0	0	1	0	1	0	1	0	0	0.666667	1	1	0.666667	0	1	0	1	0.666667	0	0.666667	0.666667
44	0	0	0.333333	0	0	0	1	0	0	1	0	1	1	0	0.333333	0	0.666667	0.666667	0.666667	1	0	0.666667	0.333333	0	0.666667	0	0	0	0	0.333333	0	0.333333	0.666667	0.666667	1	0	1	0	0.333333	0.666667	1	1	0	1	0	1	0	1	1
45	0	1	0.333333	0	0	1	0.333333	0.333333	0	0.666667	1	0.333333	0	0.666667	1	1	0	0.333333	0	0	0.333333	0	0	0	0	1	0	0	0.333333	0	0.333333	0	0	0.333333	0.333333	0.333333	0.666667	1	0	0	0.333333	0.333333	1	0	0	0	0	0.666667	0
46	0.666667	1	0.333333	0	0	0	0.333333	1	0	0.333333	0	0	1	1	0	1	1	0.333333	0	0.333333	0.333333	1	1	0.333333	0	0	0.333333	0.333333	0.333333	0.333333	0	1	0	0	0.333333	0	1	0	0.333333	0	0	0.333333	0.333333	1	1	1	0	0.333333	0
47	0.666667	1	0.666667	0.666667	1	0	0	1	0.333333	1	0	1	0.333333	0.333333	0.333333	0.333333	0.666667	1	1	1	0	1	0	0.666667	0.666667	0	0	1	0	0	1	0	0.666667	0	1	1	1	1	0	0	0	0	0	1	0.333333	0	0	0.333333	0.666667
48	1	0.333333	0	0	0	1	0	1	0.333333	0.333333	1	0.666667	0	0	0	0.333333	1	0.333333	0	1	0	1	0	0.333333	0	0	0.666667	0.666667	0	0	1	0	0.333333	0	0	0.666667	0.666667	1	0.666667	1	1	1	1	0	0	0	0	0.333333	0.666667
49	1	1	0	1	0.333333	1	1	0	0.666667	0	1	0.333333	0.666667	0.333333	1	1	0	0	0	0	0.333333	0.333333	1	0	0.333333	0.666667	0	0	0	0	1	0.333333	0.666667	0	0.666667	1	0.666667	1	0	0.666667	1	0.666667	0.666667	0	0	0	0	0.666667	1
50	1	0	0	0.666667	1	0.333333	0	1	0.333333	1	1	0.333333	0.666667	0	0	0.333333	1	1	1	0.666667	1	1	0	0.333333	0.666667	0	0.666667	0	0.666667	0	0	0.666667	1	1	1	0.333333	0.333333	1	0.333333	1	1	0.333333	0	0	0.333333	0	0.666667	0.666667	0.666667
51	0.666667	0	0	0	0	0.333333	0	0.333333	0.333333	0.333333	1	0.333333	0.333333	0	0	0	0.333333	0	1	0	0	0	1	0.666667	1	1	0.333333	0	1	0.333333	0.333333	0	0.666667	0	1	0.333333	0	0	0	1	0	0.666667	1	0	1	1	0.666667	1	1
52	0	0	0.333333	0	0	0.333333	0.666667	1	0.333333	0	0.333333	1	1	1	0.333333	1	0	0.333333	0	0	0.333333	1	0	0	0	0	1	0.666667	0	0.333333	0.666667	1	0	1	0	0.333333	0.333333	1	0.333333	0	1	0.333333	0.666667	1	0	0	0.333333	0.333333	0
53	1	1	0.666667	1	1	1	1	1	1	0	1	1	0.333333	0.666667	0	1	0	0.333333	1	0	0.333333	0	1	0.333333	1	0	1	0.666667	1	0.333333	0	0	0	0.666667	0	0.666667	0.666667	0.666667	0.333333	0	0.333333	1	1	1	0	1	0	1	1
54	0.666667	0	0.666667	0.666667	1	0	0.333333	1	0.333333	0.666667	1	1	1	0	0.333333	0.666667	1	1	0.666667	1	0.333333	1	0	0	0	0	0.333333	0	0	0.666667	0	0	0	1	0.333333	0.666667	0.666667	1	0	1	1	0	1	0.333333	0.333333	1	0	0	0
55	0.333333	0	0	0	0	0	0.333333	0	0.333333	0	0	0.666667	0	0	1	1	1	0	0.666667	0	0	0	1	0	0.333333	0.666667	1	0.333333	0.333333	0.666667	0	0	1	1	0	0.666667	1	1	0.333333	0.666667	0	0	0.333333	0	0	1	0.333333	0.333333	1
56	0.333333	1	1	0.666667	1	0	0	1	1	0.666667	1	0	0.333333	1	0.333333	0.333333	1	0	1	0.333333	0	0	0	1	0	1	1	0.666667	0	1	0.666667	1	1	0	1	0.333333	0	1	0.333333	1	0.333333	0	0.666667	1	0	1	0	0.333333	0.333333
57	1	0	0	0	1	0.666667	0.666667	0.333333	0.666667	0.333333	1	0.333333	0	1	0.333333	0	1	0	0	0	0.333333	0	0	1	1	0	0.333333	0.666667	1	0.333333	0	0	0	0.666667	0	0.666667	1	0	0.333333	0	0	0	0	0.333333	0.333333	1	0	1	0.333333
58	0	1	0	0	0	0.333333	0.666667	1	1	1	0	0.333333	0	0	0.333333	0.333333	1	0.333333	0.333333	0	1	1	1	0	1	1	0	0.333333	0.666667	0.333333	0	0	0.333333	0	0	1	0.666667	0	0	0.666667	0	0.333333	1	0	0	0	0.666667	1	1
59	0	1	0	1	0	0.333333	0	1	0	0.666667	0	0	1	0.333333	0	0.333333	0.666667	0	0	1	1	0	1	0	1	0	0	0.333333	1	0.333333	0	1	0.333333	0	0.666667	0.666667	0.666667	1	0.333333	0	0	0	1	0	0.333333	1	1	0.333333	0.333333
60	0	0.333333	0	1	0	0	1	0	0	0	0	0	0.666667	1	0	0	0	0	1	0.333333	1	1	0	0	0	0	1	0	0.666667	0	0.333333	0	1	1	0	0.333333	0	1	0.333333	0	1	1	0.666667	1	0.666667	0	0	0.333333	0.333333
61	0	0.333333	1	0.666667	0	0	0	1	0.333333	0	0	0	1	1	0.333333	0	0.666667	0	0	0.333333	0.333333	0	0	0	1	0	0.333333	0	1	0	0	0	0	1	0	0	0	0.333333	0.333333	0	1	0	0	1	0	0	1	0.333333	0
62	0	0.333333	1	0	0.666667	1	1	1	0.333333	0.333333	0	0	1	1	0	0	1	0	0	0.666667	1	0.333333	1	1	0.333333	0.666667	0	0.333333	0.333333	0.333333	0.333333	0	0.333333	1	0	0.666667	0	0	0.333333	0	0	0	1	0.333333	0.333333	0.333333	0.666667	0	1
63	0	0	0	0	0	0	1	1	1	0	1	0	0.333333	0	1	1	1	0	0	0.333333	0	0.666667	1	0.666667	0	0	0.333333	0.666667	0	0	0.333333	0	1	0.333333	0	1	0.333333	0	0	0	1	0	0	0.333333	0	0	0.666667	0	0
64	0	1	0	0	0.666667	0	0	0.333333	0	0	0	1	0	1	1	0	0.666667	0	0	0	0	0.333333	0	0	0	1	0	0	0.333333	0	0	0	0	0.333333	0.333333	0	0	0	1	0.666667	1	1	1	0.666667	0	0.333333	0	0.666667	1
65	0	0.333333	0.333333	1	1	0	0	0	0	0.666667	0	0.333333	0	1	0	0.666667	1	0	0	0	0	0.666667	0	0	1	1	0	0	0.666667	0	0.666667	0	0	0.333333	0	0	0	1	0	0	0	0	0	1	0	1	1	0	0
66	0.333333	1	0	1	1	1	0	0	1	1	1	1	0.333333	0	1	0.333333	0	0	1	0	0.666667	1	1	0	0	0	1	0	0	0	0	0	1	0.333333	1	1	0.333333	0	0	0	0.666667	0	0.333333	0.666667	1	0	0.666667	1	0
67	0	0	1	0	1	1	1	1	0	0	1	1	0	0	1	0.333333	0.666667	0	0.333333	1	1	0.333333	0	0.333333	0	0.666667	0	0.333333	0.666667	1	0.666667	0	0	0	1	0	0	0.666667	1	0	0	0	0.333333	1	0	0	0.666667	1	0
68	0.666667	0	0	0	0	0	0.333333	0.666667	1	1	1	0.666667	1	0	1	0.333333	0	1	0	1	1	0	0	1	0	1	0	0	0.333333	0	0	0.666667	1	0.333333	1	0	0.333333	0	0	0.333333	0.666667	1	1	0	1	1	0	1	0
69	0.333333	0	1	0.333333	0.333333	1	1	1	0	1	1	1	1	1	0	1	0.666667	1	0.333333	0	1	0	0.333333	0	0	1	1	1	0.333333	0.333333	1	0.666667	1	0	0	0.333333	1	0.333333	1	0	0	0.333333	0	0	0.333333	1	0	0.666667	0
70	0	0	0	0.333333	1	1	0	1	0	1	1	0	0.666667	0	0	0	0.666667	0	0.333333	0.666667	0	0.333333	1	0	0	0.666667	0	0.333333	0	0	0.333333	0.333333	1	0.666667	0	0	0.333333	0	0.666667	1	0.333333	1	0.333333	1	1	0	0	0	0
71	0.666667	1	0	0.333333	0	0.666667	0	0	0	1	0	0.666667	0.333333	1	1	1	1	0	0	0	0	0.333333	0.333333	1	0	0	0.333333	0	0	0	0	0.666667	1	1	1	0	0.333333	1	1	0.333333	0	0.666667	0.333333	0	0	1	0	1	0.666667
72	0	0	0	0	0.333333	0	0	1	0	0.333333	0.333333	0	0	0	1	0	0.333333	0	0.333333	1	0	0.666667	0.666667	1	0.666667	0	0	0	0	1	0	1	0	0	0.333333	1	1	0	1	0.333333	0	0	0.333333	0.666667	1	1	1	0	0
73	0	0.666667	1	0.333333	0	0	0	1	0.333333	0	0.666667	0	1	0.666667	0	0.333333	0.666667	1	1	0	1	0.333333	0.333333	1	0.333333	0	1	0.333333	0.333333	0.333333	0.333333	1	0.666667	1	1	0	0.333333	0.666667	1	1	0.666667	1	0.333333	0.666667	0	0	1	0.333333	0
74	0	0.666667	0.666667	0	1	0	0.333333	0.333333	1	0	1	1	0.666667	0	0.333333	1	1	1	0	1	0.333333	1	1	0.333333	1	0.666667	0.666667	0	1	0.333333	0.333333	0.666667	0	0.666667	0	1	0.666667	0.666667	1	0.666667	0	1	0	0.666667	0	0.333333	0	1	0
75	0	1	0	1	0.333333	1	0.333333	0.333333	0	0.333333	0	0.333333	0.333333	0	1	0	0	1	1	1	1	0.333333	0.333333	1	1	1	0.333333	0.333333	0.333333	1	0	0	0	0.333333	0.333333	1	0.333333	1	1	1	0	1	0.666667	0.666667	1	0	1	0	0
76	0.333333	0.666667	0	1	0	1	0.666667	0.666667	0	1	1	0.666667	0.666667	0	0.666667	0.666667	0.666667	1	0.666667	0	1	1	0.333333	1	1	1	0.333333	1	0.333333	1	0	1	1	0	1	0.333333	0.666667	1	1	0	0.666667	1	0.333333	1	0	0.333333	1	1	0.666667
77	0	1	0	1	1	0	0.333333	1	1	0.333333	0.333333	0	0	0.333333	0.333333	1	1	0.333333	0	0	0	0	0	1	1	0.333333	0.333333	0	1	1	0	0	0	0	0	1	0.666667	0.666667	1	0	1	0.333333	0	0	1	0.333333	0	1	0
78	0	1	0.333333	1	0.333333	0.333333	1	0	1	0.666667	0	0	0.333333	0	0.333333	0.333333	1	0.333333	1	0	1	0.333333	0.333333	0	0	0	1	1	1	0.333333	0	0	1	1	1	1	1	0	0	0	1	1	0.333333	0	0	0	0.333333	0.333333	1
79	0.333333	0	0	1	0.333333	1	0	0	1	0	0	0.666667	1	0.333333	0.333333	0	0.333333	0	0	0	1	0.333333	0.333333	0	0.666667	1	0.666667	0	0	1	0.333333	0	0	1	0.333333	0.666667	0.333333	1	1	0	0	1	0	1	0.666667	1	0	0.333333	1
80	1	0.333333	0	1	0	1	1	0.666667	0.666667	1	1	1	0	0.333333	0.666667	1	0	0	0	0.333333	0	1	0	1	0	0.333333	0	0.666667	0	1	0	0.333333	0	0	0.333333	0.666667	1	1	1	0	0	0	0	1	0.666667	1	0	1	0
81	1	0.666667	1	1	0.333333	0	0.333333	0.333333	1	0	0.333333	1	1	0.333333	1	1	0.333333	0	0.333333	0	1	0	0.666667	0.666667	0	0.333333	0.666667	1	0	0.666667	0	0	0	0	1	0.666667	1	0	0	0	0	0.333333	0.333333	0.333333	0.333333	0	1	0.333333	0.333333
82	1	0	0	0	0	0.333333	0.666667	1	1	0.333333	0	0	0	0.333333	0	1	0	1	1	0.333333	1	0	0.333333	0	1	1	0	0.666667	0	0.666667	1	0	0	1	0.333333	0	0	0	0	1	0	0.666667	1	0.666667	1	1	0	0	1
83	0	0.666667	0	1	0.666667	0	0	0	0	0	0.333333	0.666667	1	0.333333	0	0	0	0	1	0	1	0	1	0.666667	0	0	0.666667	1	0.333333	0	0	1	1	1	0.333333	0.666667	0	0.666667	0.666667	0	0.666667	0.666667	1	0.333333	1	0	0	0.666667	0.333333
84	1	0.333333	0.666667	0	0.333333	0	0	0	1	0.333333	0	0	0	0.333333	0.333333	0.333333	0.333333	0	1	0	0	0	0.333333	0.666667	1	1	0	1	1	1	0.666667	0	0.333333	0	0.333333	0.333333	0	0.666667	1	0.333333	0	1	1	0.333333	0	1	0.333333	0.666667	1
85	0.666667	1	1	0.333333	0	0	0	0	0.333333	0	1	0.333333	0.333333	0	1	1	0	0.333333	0	0	0.666667	1	0	0	0	0	0.333333	0.333333	0	1	0	0	0	0	0.333333	0	0	0.333333	1	1	0	0.333333	1	0	1	0	1	1	1
86	0	0.666667	1	1	0	0	0	0	0	0.333333	0	0.333333	1	0.333333	0.666667	1	0	0	0	0.333333	0.333333	0.666667	0.333333	0	0	0	1	0.333333	0	0	1	0.333333	1	1	0	1	0	0.333333	0.333333	0	1	0	1	0.333333	0	0.333333	0.666667	0.666667	0
87	1	1	0.333333	0.333333	0	0.666667	1	0.666667	0.666667	1	0.666667	1	0	0.666667	0	1	0	0.333333	0	0.666667	0.666667	0	0.333333	0.333333	1	0	1	0.333333	0.666667	0.666667	0	0	0.666667	0	0	0.333333	1	0	1	1	0.333333	1	0	0.333333	0.333333	1	0	1	0.333333
88	1	0	0	1	0.333333	0.333333	0.666667	0.333333	0	0	0.666667	0	0.333333	1	1	0	0.333333	0	1	0.333333	0.333333	0	0	0.666667	1	1	1	1	0.333333	0	0	0.333333	0.666667	1	1	1	0	0	0.333333	0	0	1	0	0.333333	0	1	1	1	0
89	0	0	0	0	0.333333	0.666667	1	0	0	0.333333	1	1	1	1	0.666667	1	0	1	1	0	0	1	0.333333	0	1	0	0	1	0	0	1	1	0.666667	0	1	0	1	0.666667	1	0.666667	1	0	1	0	1	0	0.666667	0	0
90	1	0.333333	0	1	0	0	0.666667	0	0	1	0	0.666667	1	0.333333	1	0.666667	0	1	0	1	0	1	0.333333	0	0.333333	1	1	0.333333	0.333333	0	0.333333	0.666667	0	0	0	0	1	0.333333	0.333333	0	1	1	0	1	0.333333	0.666667	0	0	0.333333
91	0	0.666667	0.666667	0	1	1	1	0	0.666667	1	0	1	0	0.333333	1	1	0.333333	0	0	0	0	1	0	0	0	0	1	0	0	0	1	0.666667	1	0	0.333333	0.333333	1	0.333333	0	0	0.333333	0	0	0	1	1	0.333333	0	0
92	0	0	1	0	0	0.333333	0.666667	1	0	1	0.333333	0	0	0.333333	0.666667	1	0	0	0	0.333333	0.333333	0	0.333333	0	0	0	1	0.333333	0	0	0	0.333333	0.333333	0	0.333333	0	0.333333	0.333333	0	0	0	0	0.666667	0	0	0	1	1	0.333333
93	0.333333	1	1	0	0	1	0	0	0	0	0	0	1	0.333333	1	0.666667	0	0	0	0.333333	0.333333	0	1	1	0	0.666667	1	0.333333	0.666667	0	0	0	0.666667	1	0.333333	0.333333	1	0.333333	0	0	0	1	0	1	0.666667	0	1	0	1
94	0	0.666667	0	0	0.333333	0.333333	0	0	1	0	0.333333	0.333333	0.666667	1	1	0	0	0.666667	1	0	0	0.333333	0.333333	0	0	0	1	1	0.333333	1	0.333333	0	0.666667	0	0.333333	0.333333	0	0.333333	0	0.333333	0	1	0.333333	0.333333	0	0	0.333333	0	1
95	0	1	1	0	0	0	0	0.333333	0.666667	0	0.333333	0	0	0	0	0	0.333333	0	0	1	1	0	0	0.333333	0	0.333333	0	0	0.333333	1	0.333333	0	0	0	0	0	0	0.333333	1	0	0.666667	1	1	0.333333	0.333333	0	0	1	0
96	0.333333	0.333333	0	0.666667	0	0.666667	0	0.333333	1	1	0.333333	0	0	0.333333	1	0.333333	0.333333	0.666667	0	0	0	0	0	0	0.333333	0.333333	0.666667	1	1	0.666667	0	0	0	0	0.333333	0.666667	1	1	1	0	0.333333	0	0	0	0	1	0.333333	0	0.333333
97	1	1	0.333333	0.333333	0	0	0.666667	1	0.333333	1	0	1	0	0.333333	1	1	0	0	1	0	0	0	0.333333	1	0	0	1	1	0	0	0	0.333333	0	1	0	0	0	0.333333	1	0.333333	1	0.666667	0	0.333333	0.333333	1	0.333333	0	0
98	0	1	1	0	0.333333	1	1	0	0	0.333333	0	0	0	0	1	0.333333	1	1	0	0	0	1	0.333333	1	1	0.333333	0	0.333333	0.333333	0	0	0.333333	0.333333	0.666667	1	0.666667	0	0	0.333333	1	0.333333	0	0	0.333333	0	0	0.333333	1	0
99	0	0	1	0	0.333333	0	0	0	0	1	0	1	0	1	1	0	0	0	1	0.333333	0	1	0.333333	0	0.333333	1	1	1	0.333333	1	0	0	0	0	0	0	1	0	0.666667	0	0	1	0.333333	1	0.666667	1	0	0	1
100	1	0	0	1	0.666667	0.666667	0	0	0.666667	0	0	0.666667	0	0	0.666667	0	0.333333	0.333333	0	1	1	0	1	1	0	0	0	0.666667	1	0.666667	1	0	0.333333	0.666667	0	0	1	0	0	1	0.333333	0.333333	0	0	0.333333	1	1	1	0
101	0	0	0	1	0	0.333333	0	0	1	0	1	0	0	0	0.333333	0.333333	0	0.333333	1	0.333333	0	1	0.333333	1	1	1	0	1	0	1	0.333333	0.333333	0.666667	0	1	1	1	0	0	0	0.333333	0.333333	1	0.666667	0	0	0.666667	0.666667	0
102	0	0	1	0	0	0.666667	0	0.666667	0	0.333333	0	1	0	0	0.666667	0	0	0.333333	0	0.333333	0.666667	0	0	0	0	0	1	0	0	0.333333	1	0.333333	0	1	0.333333	0.333333	0.333333	0	0	0	1	0.666667	1	0.333333	1	0	0	0.333333	0
103	0	0.333333	0	0	0.333333	0.333333	1	0.333333	0	0	0	0.333333	0.666667	0	0.666667	1	0	0	0	0	0.666667	0	0.666667	0	0	0.666667	0	0	1	1	1	1	0	1	0.666667	1	1	0	1	0	0	0	1	0.333333	0.333333	0	1	1	0.666667
104	1	0	1	0.333333	0.666667	0	0	0.333333	0	0.666667	0.333333	0.333333	0	0.333333	0	0	0	0	0	0.333333	0.333333	0.666667	0.333333	0	1	0.333333	0	0	0.333333	1	1	0	0.666667	1	1	1	0.333333	0.666667	0	0	0	1	0	0.333333	0	0.333333	0.666667	0	0
105	0	0	0.666667	0.333333	0.333333	0	1	0	0	1	0	1	1	0.333333	1	1	0	0.666667	0	1	0.666667	0	0.333333	0	0	0.333333	0.666667	1	1	1	1	0.333333	0	0.333333	0.333333	0.666667	0	0.333333	0.333333	0.333333	0	0	0	1	1	0.333333	0	1	1
106	1	0	0.666667	0	0.333333	0.666667	1	0	0	0.333333	0	0	0	1	1	1	0	0.666667	1	0	0.666667	1	0	0.666667	0	1	0.666667	1	0.333333	0.666667	0	0	0.333333	1	0	0	1	0	0.333333	0.333333	0.666667	1	0	0.333333	1	1	0.333333	0.333333	1
107	1	0.333333	0.333333	0.333333	0	0	0	0.333333	0	0.666667	0	0.333333	1	0	0	1	0	0	1	0.333333	1	0	0	1	1	1	0.333333	0.333333	1	1	1	0	1	0	1	1	0	1	1	0	0.666667	0.666667	1	0.666667	0	0	0.666667	0	0
108	1	0.333333	0	1	0	0	0	1	0	1	0	1	0.333333	0.333333	0.666667	0	1	1	1	0	0	0	0.333333	1	0	0	1	1	0	0.333333	1	0.666667	0	0.333333	0.333333	0	0	0	0	1	1	1	0.333333	0.666667	1	0.333333	0.333333	0	0
109	0	0.333333	0	0	0	0.666667	1	1	1	0	0.666667	0	0	0.333333	0	0	0.333333	0	1	0	1	0	0.666667	0.666667	0	1	1	1	0	1	0	0.333333	1	0	0	0	1	0.333333	0.333333	1	0.333333	0	0	0	1	0.333333	0.333333	0	0
110	0.333333	0	0	0	0	1	0	1	0.666667	0	0	0	1	0.333333	0.333333	0	0.333333	0	0	0	1	0.333333	0.333333	0	0	0	0.666667	0.666667	1	1	0.333333	0.333333	0	0.333333	1	1	0	0	0	1	0	0	0.333333	0.666667	0.666667	0	0.666667	1	1
111	0.333333	0	0.666667	1	1	1	1	0	0.333333	0.666667	1	0.666667	0.333333	0	0.666667	1	1	0.666667	0	0	0	1	1	1	0	0	0	0	0.333333	0	0.333333	1	1	0	1	1	0	0	0.333333	0	0	0	0	0.333333	1	1	0.333333	1	0
112	0	0.666667	1	0	0.333333	0.333333	0.666667	0	0.333333	0	0.333333	0	0.333333	0.666667	0	0	0.333333	1	0	0.666667	0	0	0.666667	1	0	1	1	0	1	0	1	0	0	0	0.666667	0.666667	0	0	1	0.666667	1	0	1	0.333333	0	0.666667	0	0.333333	1
113	1	0	0	1	1	1	0	0.666667	0.666667	0	0.666667	0	0	0.333333	1	1	0	1	0.333333	0.333333	0	1	0.333333	0.666667	1	0	0	0.333333	1	0.333333	0.333333	0.333333	0.666667	1	1	1	0	0.666667	0	0	0.333333	0.333333	1	0	0	0.666667	1	0.333333	1
114	0.333333	0.666667	0	1	0	1	0	0.333333	0	0	0.333333	0.333333	1	0.333333	0	0	0.333333	0	0	0	1	1	0	0	0	1	1	0.666667	0.333333	0.333333	1	0	0.666667	0	0	1	0	0	0	1	0.333333	0.666667	0	0.333333	0	0	0	0	1
115	0	0	0.333333	0.333333	0	1	0	0.666667	0	0	0	0.666667	1	1	0	1	0.333333	0.666667	0	0	0.666667	1	0.333333	0.333333	1	1	1	1	0.333333	0	0.333333	1	0	1	0	0.666667	0	0	0	0	0.333333	0	0	0	1	0.333333	0	0	0.333333
116	0	0	0.666667	0	1	1	1	0	0.333333	1	0.333333	1	1	0.333333	0	0	0	1	0	1	1	0	0	0	1	0	0	0	1	0.666667	0	0	1	1	0.333333	0.333333	1	0.333333	0	0.333333	0	0.333333	1	1	0	0.666667	0	0	1
117	0.666667	0.666667	0	0.666667	0	1	0	0.666667	0	1	0.666667	1	0	0	0.333333	0.666667	0.666667	0.666667	0	0	1	0	0	1	0	0	0	1	1	1	1	0	0	1	1	0	1	0	0	0	0.333333	0.666667	1	1	0.666667	1	0	0	1
118	1	0	0	0	0.333333	0.333333	1	0.333333	0	0	0	0.666667	1	0	0	1	0.333333	0	0.666667	0.666667	0.666667	0	0	1	0	1	0.333333	0.333333	0.666667	1	0	0.333333	0.333333	0	0	1	1	1	0.333333	0.333333	0	0.333333	0	0	0.666667	0	1	1	0
119	0	0	0	0	0.333333	0	1	0	0.666667	0	0.333333	1	1	0	1	0	0.333333	0.666667	0	0	0	0	0	0.333333	0	0.666667	0	0	0.333333	0.333333	1	0	0	1	0	1	0	1	1	0	0	1	0.333333	0.333333	0.666667	1	1	0.666667	1
120	0	0	1	1	0.333333	0	0	0	1	0	0.333333	0	0	0	1	0.333333	0.333333	0.666667	0.333333	1	1	0	0	0	1	0.333333	0.333333	0	0.333333	0.333333	0	0.666667	0	1	1	1	0	1	1	0	0	0	0.666667	0.333333	0.333333	0	0	0.333333	0.666667
121	1	0	1	0	0	0	0	0	0	1	0	1	0	1	0.666667	0	0	0.666667	0	0.333333	1	0	0	1	1	1	0	1	1	0	1	0.333333	0	1	0.333333	0.333333	0.333333	1	0.333333	0.333333	0.333333	0	0.333333	0.333333	1	1	0	0.666667	1
122	0	0	0.666667	0	1	0	1	1	0.666667	1	1	0	0.666667	0	0	0	0.333333	0.333333	1	0.333333	1	1	0	0.666667	0	0.666667	0.666667	0	0.333333	0.333333	0.666667	0	0	0	0.333333	0.333333	0	1	0	1	1	1	0.333333	0	1	0	0	0.333333	0
123	0	1	1	1	0	0	0	0.333333	0	0.333333	1	1	0	0	1	0	0	0	0.333333	0	0.333333	0	0.333333	0	1	1	1	0	0	0.666667	0	0	0.666667	0	0.333333	0	0.333333	0.333333	1	1	0.333333	0.333333	0	0	0	1	0.333333	0.666667	1
124	0.333333	1	1	0	0.333333	1	0	0.333333	0	0	0	0	1	0.666667	0	0	0	1	1	0.333333	1	0	0.333333	0.333333	1	0.666667	0	1	1	0.333333	1	1	0	1	0	0.333333	0	0.333333	0.333333	1	0.333333	0.666667	1	1	1	1	0.333333	0.666667	0
125	0	0	0	1	0.333333	1	0	0.666667	0	0	0.333333	0	0	0	1	0	0	0.333333	1	1	1	1	0	0.333333	0	1	0	0	0	0	0.666667	0	0.666667	1	0.666667	0	1	0	0	0.333333	0	0.333333	1	0.333333	1	1	0	1	1
126	0	1	0	0	1	0	1	0	1	0.333333	0	0.666667	0	0.666667	0.666667	0	0	0.666667	1	0	0.333333	1	0	0	1	1	1	0	0	1	0	0.333333	0	0	0	0	0	1	1	0	0	0.333333	0	0.666667	1	0	1	1	0
127	0	0.333333	0	1	0	0	0	0	0	0	1	0.666667	0	1	1	1	0	0.666667	0	0.333333	0	1	0.333333	0	0	0.333333	0	0	1	1	0	0	0	0.666667	1	1	0.333333	1	1	1	1	1	0	0.333333	0	0	0.333333	0	0
128	1	1	0	0.666667	1	0.333333	1	0.333333	0.666667	0	0.333333	0.666667	1	1	0.666667	1	0.666667	0	0	0.333333	0.333333	0	1	0.333333	0.333333	0.333333	1	0	1	1	0	0	0	0	1	0.666667	1	1	1	0	0.666667	0	0	1	0	1	0.333333	0	0
129	0.333333	0.333333	0	0	0	1	0.333333	1	0	1	0.333333	0	0.333333	1	0	1	0	0	0	0.333333	1	0.333333	0.333333	0.333333	1	0.666667	0	0	0.333333	0	0	0	0.666667	0	1	0	1	0	0	0	0	0.333333	0.666667	1	0.666667	1	0	0.333333	1
130	0	0.333333	1	0	1	0.666667	1	0.333333	1	0	0.333333	0.666667	1	1	0	1	0.666667	0	0	0	0	1	0.333333	0.666667	0	0.333333	0	1	0	0	0	1	1	1	0	0	0.333333	0.333333	0	1	0	1	0.333333	1	0.333333	1	0	0.666667	1
131	0	0	0	0.333333	0.333333	0.333333	0	0	0.333333	1	1	1	1	0	1	0.333333	1	1	0	0.333333	0.333333	0	0	1	1	0	0.333333	0.666667	0	0.666667	0	0.333333	0	0	1	1	1	0.333333	0	0	0	1	0	1	0.333333	0	1	0	0
132	0	0.333333	0	0	0.333333	0	0	0	0	0.333333	0	1	0	1	0	0	1	0	0	0.333333	0	0	0.666667	1	0	1	1	0	0	1	0	1	0	0	0	0.666667	0.666667	0.666667	0.666667	0	0.666667	1	0	0	1	0	1	1	0
133	0	1	1	0	0	0	0	0	0	0	0.666667	0.666667	0.333333	0	0	0	1	0	0.333333	0	1	0.333333	0.333333	0	0.333333	0.666667	1	1	1	1	0.333333	0	0	0.333333	0	0	0	0.666667	1	0.333333	0	0	0	0.666667	0	0.333333	0	0	0
134	0.333333	1	1	0	0.333333	0	0	1	0	1	1	1	0	0	0.666667	0.333333	0	0	0	0	0.333333	0	0.666667	0	0.333333	0.666667	0	0.333333	0	0.333333	0	0	0.333333	0.666667	0	0	0	1	0	1	0.666667	0	0	0.333333	1	0.333333	0	0	0
135	1	1	1	0	0.333333	1	1	0.666667	1	0	1	1	0	0.333333	0	0	0.666667	0	1	0	1	0.333333	0.333333	0	0	1	0.333333	1	1	0	0.333333	1	0	0	0.333333	1	0.333333	0	1	0.333333	0	1	0.333333	1	1	0.333333	1	0.666667	1
136	0	0.333333	1	0	0.333333	0	0.333333	0	1	1	0.666667	1	1	1	0.333333	0.333333	0	0.333333	1	1	1	0.333333	0	0.333333	1	0.333333	0.666667	0	1	0	1	0	1	0.333333	0.333333	0.333333	0	0.333333	0	0	1	0.333333	0	0	0	0	1	0	0.333333
137	0.666667	0.666667	1	0.666667	0	0	0	1	1	0.333333	1	0	0	0	0	0.333333	0.333333	0	0.333333	0	0	0.666667	1	1	1	0.333333	1	0.333333	0.333333	0.333333	1	0	1	0.666667	0	0	1	0.333333	1	1	0.666667	0	0.666667	1	1	0.333333	0	0	0
138	0	0	1	0.333333	0	0.333333	1	0.333333	0.666667	1	1	1	0.666667	0	0.666667	0	0	0	1	0.333333	0.666667	0	0	1	0	0	0	1	0.333333	0	1	0	1	0	0	0	1	0	0.333333	0	0	0	0	0	0	0	0.333333	0.666667	0
139	0	0.666667	1	1	1	0.333333	1	0	1	0.333333	0	0.333333	1	0.333333	0.666667	0	0	0.333333	1	0.333333	0.666667	0	0	1	0.333333	0.666667	1	0	0.333333	0	0	0.333333	0.333333	1	0.333333	0	0	0.333333	0.666667	1	0	0	0	0.333333	0.666667	0	0	0	1
140	0	0.333333	0	1	0	0.333333	0	0	0.666667	0	1	0.666667	0	0.666667	0	1	0.333333	0.666667	0	0	0.333333	0	0.666667	0	0	0	0.333333	1	1	1	0	0	0	1	0.333333	0.666667	1	0	0	0	0	0.666667	0	0.666667	1	1	0	0.333333	1
141	1	1	1	1	0	1	0.666667	0	1	1	0	0.333333	0	1	1	0	1	0.666667	1	0.666667	0	1	0.333333	0.333333	1	0.333333	0.666667	0	0.333333	0	0	1	0	1	0.333333	0.333333	0	0.333333	0.333333	0.333333	0	1	0	0.666667	1	1	0.333333	0	0
142	0	0.666667	0.666667	0	0.666667	0	1	0.333333	1	1	0	1	1	0	0.666667	1	0.666667	0.666667	0	0	0	0	1	0.666667	0	0.333333	0.666667	1	0.666667	0	0	0.333333	0.666667	0.666667	0.666667	1	0	1	0	0.666667	1	0.333333	0.333333	0	0.333333	0	0.333333	0.333333	1
143	1	0.333333	1	0	0	0	0	1	0.666667	0	0.333333	1	1	0.666667	0	0	0.666667	0	1	0.666667	0.666667	1	0.333333	0.333333	1	0	0.666667	0	0	0	0	0.333333	0.666667	0	0	1	0.333333	0.666667	0.666667	1	0	1	1	0	1	0	0	0	0
144	1	0	0	0	0	0	1	0	1	0	0.333333	0.333333	0.666667	0	0	0	0	1	0	0.333333	0.333333	1	0	0	1	0	1	0.333333	0	1	1	1	1	1	0	0.333333	0	1	0	1	1	0.333333	0.333333	0	0.333333	1	0.333333	0	1
145	0	0.333333	0.333333	0	0	1	0	0	0.333333	0	0	0	0	0.333333	0.666667	1	1	1	0	0	1	0	0.333333	0	1	0	0	1	0	1	0	0	0	0	0.333333	0	0	1	1	0.333333	0	0	0	0.333333	0.333333	1	1	0.333333	1
146	1	0.333333	1	0	0.666667	0.666667	0	0	0	0.666667	0	0	0	0.333333	0	1	0	0.666667	1	0	0	0	0	0	0.333333	0.666667	0.666667	1	1	0	1	0	1	0.333333	0.333333	1	0	0.333333	1	1	0.333333	1	0	0.666667	0	0	0.333333	0.333333	0.333333
147	0.666667	0	0	1	0.333333	0.333333	0	0.333333	0	0	0	0.666667	0.333333	0	1	0	0.333333	0.333333	1	1	1	1	0.333333	0	0	0	0.333333	0	0	0.333333	1	0	1	0	0.333333	0	0	0.333333	1	0	1	0.333333	0.333333	0	1	1	1	0	1
148	1	0	0.666667	0	1	1	1	0	0	0.333333	0	0	0.333333	1	1	0	0.333333	0	1	0	0	0	1	1	0	0	0.666667	1	0	0	0	0.666667	0	0	0.333333	1	1	0	1	1	0.333333	0	0	0	1	0.666667	1	1	0
149	1	0	1	0	0.333333	1	1	0.333333	0	1	0.333333	0	0	1	0.666667	1	0.333333	0	0	0	0	1	0.333333	0	0	0.333333	0.666667	1	1	1	1	0	0.666667	1	1	0.333333	0.666667	0	1	1	1	0	1	0	0	0	0.333333	0.333333	1
150	1	0.333333	0	1	0	1	1	0.333333	1	1	0.333333	1	1	0.333333	0	0.333333	0.333333	0	0	1	0.333333	0.333333	0.333333	0	1	0.333333	0.666667	1	0	1	0	0.333333	0.666667	0	0	0.333333	0	0.333333	0.333333	1	0	1	0	0	0.333333	0.333333	1	1	1
151	1	1	1	0	0.333333	0	0	0.333333	0	1	0	0	0	0.333333	0	0	0.333333	0	1	0	0.666667	0	0	0.666667	1	0	0	1	0.333333	0	1	0	0.333333	0.333333	1	0.333333	0.333333	0.333333	1	0	0.333333	0	0	0.333333	0.666667	1	0.666667	1	0
152	0	0	0	0.333333	0.333333	0	1	1	1	0	1	1	0	0.333333	0	0	0	1	0	0.333333	0	0.333333	0	0.333333	1	1	0	1	0	0	0	0.333333	0	1	0	0	1	1	0.333333	0.333333	0	0	0.333333	0	0	0	0	0	0.666667
153	0	1	0.333333	1	0.333333	0.666667	0	1	1	0	1	0.333333	0.333333	0.666667	0.333333	0	0	0.666667	1	0	0.666667	0	0.666667	0	1	0	1	1	0.333333	0	0	0	0	1	0	0	0	0	0.333333	0	0	1	1	0	0	0.666667	1	0	1
154	0.333333	0	1	1	0	0.666667	1	0	0	0	0	0.666667	1	0	1	0.333333	0	0	0	1	0.333333	1	0.666667	0	1	0.333333	1	1	0.333333	1	0	0	0.333333	1	0	0	0	0	0	1	0	0	0	0.333333	0	1	0.333333	0	0
155	1	0.666667	1	1	0.333333	0	0	0	0.666667	0	1	1	0	0.333333	0	0	0	0.666667	0	0	0.333333	0.666667	1	1	0	0	1	0	0	1	0	0.333333	0	1	0	0	0	0	0.333333	0	0.333333	1	0	0	0.333333	0	0.666667	1	1
156	0.333333	0	0	1	0	1	0.333333	1	0	1	1	1	0	0	0.666667	1	0.666667	1	1	0.333333	1	1	0	0.333333	0.666667	0.333333	1	0	0.333333	1	1	0.333333	0	0.333333	0.333333	0	1	0	0.333333	0.333333	0.333333	0	0	1	0.666667	0	0.333333	0	1
157	1	0.333333	0.333333	0	0.666667	0	0	1	1	0	0	0.666667	0	0.333333	0.666667	1	0.333333	1	0.333333	1	1	1	0	0	0	0	1	0.333333	0	1	0	0.333333	0.333333	0	0	0	0.333333	0	1	0	0	0	0	0	0.333333	0	0.333333	0	0
158	0.333333	0.333333	0	0.666667	0	0	0	0	1	1	1	0	1	0.333333	0.333333	1	0	0	1	0.333333	0.333333	0	0	0	1	1	1	0	0	0.333333	0	1	0	0.333333	0.333333	0	0.333333	0.333333	1	0.333333	1	0	0	0.333333	0.333333	0.333333	1	1	0.333333
159	1	0	0	1	0	0	0	0	0	0.333333	0	1	1	0	0	1	0.333333	1	0.333333	0	0.333333	1	0	0	0.333333	0.666667	0	0.333333	0.333333	0	0	0.333333	0	0	0	0	0	1	0	1	1	1	0	0	0	0	0	0.333333	1
160	0	0	0	1	0	0.333333	0.666667	0.333333	0	0	0.333333	0.666667	0	0.666667	1	1	0.333333	0.333333	0.666667	1	0	0.666667	0	0	0.333333	0	0	0	0.333333	0	0	0.333333	1	0	0.333333	1	1	0.333333	0.666667	0	0.333333	0.333333	1	0.333333	0.666667	1	1	1	0
161	0.333333	0	0	0	0.333333	0	0	0.333333	0	0	0.666667	1	1	0	0.666667	0	0	0	0.333333	1	0.666667	0	0.333333	0	0.333333	1	1	1	0.333333	0	0.333333	0	0	0	0.333333	0.666667	0	0	1	0	0	0	0	0.333333	0	0.333333	1	1	1
162	0.333333	0.333333	1	0.333333	0	0	0.333333	1	0	0	0	0	1	0.333333	0.333333	0.666667	0	0	0.666667	1	0.333333	0.333333	1	0	0.666667	0	1	0.333333	0.333333	0	0	1	0.333333	0	0	0	0	0	0.333333	0	0	0	0	0	0	0	0.333333	0.333333	0
163	1	1	1	0	0.666667	0	0	1	0.666667	0.333333	0.666667	1	1	1	0	0	0	0	0.666667	0	0.666667	0	0	0.333333	0.666667	0	0.333333	0	0	0	0	0.333333	1	0.666667	1	0	0.666667	0	0	0	0.666667	0	0.666667	0	0.333333	0.333333	0	1	1
164	1	0	0.333333	0.666667	0	0	1	0.333333	0.666667	0.666667	1	0	1	1	0	0.333333	0.333333	0.333333	0.666667	1	0	0	1	1	0.333333	0.333333	0.333333	0.333333	0	0.333333	0	0	0.333333	1	1	0.333333	0.333333	0.666667	0	0	0.333333	0.333333	1	1	0.333333	1	0	0	0.666667
165	0	1	1	1	0.333333	0	0.333333	0	0.666667	0	0	0.666667	1	1	0	0	0	0	0.666667	1	0.666667	1	0	1	1	1	0.333333	0.333333	1	0.333333	0	1	0.333333	0	1	0	1	0.333333	0	0	1	1	0	1	1	0.666667	0	0.333333	0.666667
166	0.333333	0	0	0	0	0.666667	1	0	0.333333	0.666667	1	1	1	0	0.666667	1	0	0.333333	0.333333	1	0	0	1	0.333333	1	0	0	0	0.333333	0.333333	0	0	1	1	0	0.666667	1	1	1	1	0	1	0	1	0	0.333333	0.333333	0.666667	1
167	0	0.666667	0.666667	0	0	0	0	0	0	0	0	0.333333	0.333333	1	0	0.666667	0	1	1	0	0	0.666667	0	0.666667	1	0	0	0	0	0.333333	0	1	0	0.666667	1	0	0.666667	0	0.333333	0	0.333333	0	0	1	0	0.333333	1	0.333333	0.666667
168	1	1	0	0	0.333333	0.666667	1	0	0.333333	0	0	0	0.666667	1	0	0	0.333333	1	0	1	0.666667	0.666667	0	0	0.666667	1	0	0.333333	0.666667	0	0.333333	0	0	0	1	1	1	1	0	0	1	0.333333	1	0	0	0.666667	0	0	1
169	1	0	0.333333	1	0	0.333333	0	1	0.333333	0.666667	0	0.333333	0	1	0	0	0	0	0	0	0.333333	0	0.666667	1	1	1	0	1	0	1	1	0.666667	1	1	1	0.333333	0	0	0.333333	0.333333	0	0	0.666667	1	0	0	0	0.666667	0
170	0.666667	0	0	0.333333	1	0.333333	1	0.666667	0	0	0	0.333333	0.333333	0.333333	0	0.666667	1	0	1	0	0.333333	0	1	0.333333	0	0	0	1	0	0.333333	1	0	0.666667	1	0	0.333333	0	0	0	1	0	0	0	0.666667	1	0.666667	0	0	0
171	0	0.333333	1	0	1	0.333333	1	0	0	1	1	0.333333	0.666667	0	0	0.666667	1	0	0	0	0.333333	1	0	0.333333	0.666667	1	0.333333	0	1	0	0.333333	1	0.333333	0	1	0	0.666667	0	0.333333	0.666667	0	0.666667	1	0	0.333333	0.666667	0	0	0
172	1	0	0.333333	0.666667	0	0.666667	1	1	0.333333	0	0	0.333333	0.333333	1	0.333333	0.333333	1	0	0	0.666667	0.333333	0	1	0.333333	0.333333	1	1	0.333333	0.666667	0	0.666667	0	1	0.666667	1	0	1	1	0	0.666667	1	0	0	1	0.333333	0	0.333333	1	0.666667
173	0.666667	0	0.666667	1	0	0.333333	0	0	0.333333	0	0	1	1	1	0.333333	0	0	0	0.333333	0	1	0	1	0	0.333333	1	1	1	1	0.333333	0	0.666667	1	0.666667	1	1	1	1	0.333333	1	0	0.666667	1	1	0.333333	0	1	0.333333	0.333333
174	0	0	0.333333	0.666667	0	1	1	0.333333	0.666667	0	0.333333	0.333333	0	0	0	0.666667	1	0	0.666667	0	0	0	0	0.333333	0.666667	1	1	0.333333	0.333333	0.333333	1	0	0.333333	0.666667	1	0	0	0.333333	0	0	1	0	0	0.333333	0.333333	0	0.333333	0.666667	1
175	1	0	1	1	0	1	1	0	1	1	1	0.666667	1	1	0.333333	0.333333	1	0.333333	0.333333	0	0	0	0	0.333333	0.666667	0	0.333333	0	0.333333	0.333333	0	1	0	0	1	0	1	0	0	0	0	0.666667	0	0	0	1	1	0	0
176	0	0	0	0.333333	1	1	1	1	0	0	1	0.333333	0	1	0.333333	0	0	0	0	1	0	1	0	0.333333	1	1	0	0	1	0.333333	1	1	0.333333	0.333333	0.333333	0	0.333333	1	1	0.666667	0	0.333333	0.666667	1	1	0	1	1	0
177	0	0	1	0	1	0	0.666667	0	0.666667	0.666667	1	0	0.333333	1	0.333333	0	0	0.333333	1	0	0.333333	0.666667	1	0.333333	1	1	1	0	1	0	1	1	0.333333	0.666667	1	0.333333	0.666667	1	0.666667	1	1	1	0.666667	1	0.333333	1	0	0	0.333333
178	0.666667	0	0.333333	0.333333	0	0	0.333333	1	0	1	0	1	0.333333	1	0	0	1	0.333333	0.666667	1	0	0	0.333333	0	0.666667	1	0	1	0	1	1	1	0.333333	0	0	0.333333	0	0	0.333333	1	0	0.333333	0	0	0.666667	0.666667	0	0	0.333333
179	0.333333	1	0.333333	0	0	0.333333	1	0	0	0	0	0.333333	0	0.333333	1	0.333333	1	1	1	0.333333	0	0	0	1	0.666667	0	0.333333	0.333333	1	0	0.666667	0	0.666667	1	0	0	1	0	0.666667	1	1	0.333333	0	1	1	1	1	0.333333	0
180	1	0	0	1	1	0	1	0	0.333333	1	1	0.333333	0	1	0.333333	0	1	0.333333	1	0	0	0	0.666667	0	0.666667	0	1	1	1	0	0	0.333333	0	0	0.333333	1	0	1	0.333333	1	0	0.333333	0	1	0.333333	0	1	0	0
181	1	0	0.333333	0.333333	0	1	0	1	0	1	0.666667	1	0.666667	1	0	0	1	0	1	1	0	1	0.333333	1	1	1	0	1	1	0	0	1	0	0.666667	1	0	1	0	0	0	1	0	0	0	0.333333	0	1	0	0.666667
182	0.333333	0	0	0	0.333333	0.333333	0	0	1	1	1	0.333333	1	0	0.333333	0.333333	1	0	0	0.333333	0	1	0	1	1	1	0	0	1	0.333333	0	1	1	0.666667	0	0	0.666667	0	0.333333	0.333333	0.333333	0.666667	0	0.333333	0	0.666667	0	0	0.666667
183	0.666667	0	1	1	0	0	0	0.333333	0	0	0	1	0	1	1	1	1	0.333333	0	0	0.333333	0	0	1	1	0	0	1	0.333333	0.333333	0.333333	1	0.666667	0	0	0.333333	0.333333	0.666667	0	1	1	0	1	0	1	0.666667	0	0.333333	0
184	0	1	0	1	0	0.333333	0	1	0	0.666667	0	0.333333	0	0.333333	0.666667	1	1	0.666667	0	0	0.333333	0.666667	0	0	0.666667	1	0.333333	0.666667	1	0	0	0	0.333333	0.666667	0	0.333333	0	1	0.333333	0	0.333333	1	1	1	1	0	1	1	0.333333
185	0.666667	1	0.333333	1	0.666667	0	0	0.333333	0.333333	1	1	0.333333	0	1	0.333333	1	0.333333	0	1	0.333333	0	0	0.333333	0	0	0	0	1	0.666667	1	1	1	0.333333	0.333333	0	0	0.666667	1	0.333333	0.333333	0	1	0	1	1	1	0	0.333333	0.333333
186	1	0	1	0	0	0	0.333333	1	0	1	0.333333	0.333333	0.333333	0	0	0	0	1	0	1	0.333333	0	1	0.333333	0	0	0	0	1	0	1	1	0	1	0	0.333333	0	1	0.333333	0.666667	1	0.333333	0.666667	0	0	0	1	0.333333	1
187	0.666667	0.333333	0	0	1	0.333333	0.666667	1	0	0	0	0	1	0	0	1	0	0.333333	1	1	0.333333	0	1	0.333333	0.333333	0.333333	0	0	0	0.333333	0	0	0.333333	0	0	0.333333	0.333333	0	1	0	1	0.333333	0.333333	0	0	0.666667	0	0.333333	0
188	0	0.333333	0.333333	1	1	0.333333	0	0	0	0	1	0.333333	0	1	0	0	0.333333	0	0	0	0	0.666667	0.666667	1	1	1	0	0.333333	0	0.333333	1	0.333333	0	1	1	0.333333	0.333333	1	1	0.333333	0.666667	0	0	0	1	0.333333	0.333333	0.333333	0
189	0.666667	0	1	0.666667	1	0	0.666667	1	0.666667	0	0	0	0	0	0.333333	0.333333	1	0	0.666667	1	1	1	1	1	0.666667	1	1	1	0	0	0.666667	1	0.333333	1	0	0.666667	1	1	0	0	0	0	0.666667	0	0	0.666667	0	1	0.666667
190	0	0	0	0.333333	0	0.333333	0.333333	0	1	1	1	0.333333	0	1	0	0	0	1	1	1	0.333333	0	0	1	1	0	0	1	0	1	0.666667	1	0.333333	0	0	0	1	0	0.333333	0	0	0	0	1	0.666667	0.666667	1	0.333333	0.333333
191	0	1	0.333333	0	0	0	0.333333	0	0	1	1	0	0.333333	0	1	0	1	0	0	0	0	0	1	1	0.333333	1	0	1	0.333333	0.333333	1	0	0.333333	0	1	0	0	0	0	1	0	0.666667	0	0	0.666667	1	0	0.333333	0.666667
192	0.666667	1	0.333333	0	1	0.333333	0	0	0	0	1	0	1	0	0.333333	0	0	0	1	0	0.666667	0	0	0	1	0	0.333333	0	1	0.333333	0.333333	1	0	0.666667	1	1	1	1	0.333333	0	0.333333	0.333333	0.333333	1	1	0	1	0.333333	0
193	0	0	0	1	0	0.333333	0.666667	0	1	0	0	1	0	0	0	1	0	0	0	1	1	1	0	0	0.333333	0.666667	1	0	0.666667	0	1	0.333333	1	0	0	1	1	0	0	1	1	1	1	0	1	0	1	0.333333	1
194	1	0	0	0	0	0.666667	1	0	1	0	0	0	0	0	1	0.333333	0.333333	0	0.333333	0.333333	0	0	0.333333	1	1	0	0	0	0	0	1	0.333333	0.333333	0.666667	0	0	0	0.666667	1	1	0	0.333333	0	1	0	0	0	0.333333	0
195	0	0	0.333333	0.333333	0	0	1	0	0.333333	0	0	0.333333	0	0	0.333333	0	0	0	0.333333	0	0.333333	0	0	0.666667	1	1	0	0.666667	1	0	0	0	0.333333	0	0.333333	0.333333	0	0	0	1	0	0.333333	0.666667	0	0	0	0.333333	0.666667	0
196	0	1	0	1	0	0	1	1	0	1	0.333333	0	0	0	1	1	0.333333	0	0.666667	0	0.333333	0	0.333333	0.333333	0	1	0.333333	0.666667	1	0	1	0	1	1	0	0.666667	0.666667	1	0.333333	0	0	0	0	0	0	0.666667	1	0	1
197	0.333333	0	1	1	0	0.333333	0	1	0	1	0	0.666667	0.666667	0	0.666667	1	1	0	0.666667	0	0.666667	1	1	0	0.333333	0.333333	0.333333	0.666667	1	1	1	0	0	0.666667	0	0.333333	0	0	0	0	0	0.333333	0	0.333333	0	1	0	0	0.333333
198	0	0	0	0	0	1	0	1	0	0.666667	0	0	0	0	0.333333	1	1	0	0.666667	1	0	0	0.333333	0.333333	1	0	0	0.333333	0	0.333333	0.333333	1	0	0.333333	0	0	0.333333	0.333333	0.333333	0	0	0	0.333333	0.666667	0	0	0	0.666667	1
199	0	0	1	1	1	0	0	1	0	1	0	0.333333	0.666667	1	0.666667	1	0	0	1	0	0.333333	0	0	0	0	0	0.333333	0.666667	1	0	0.666667	0	0	1	0	0.333333	1	1	0.666667	0.666667	1	0	0	1	1	1	1	1	0.333333
200	1	1	0.666667	1	1	0	0	1	1	0.666667	1	0	1	0.333333	0	0	1	0.333333	1	0	1	0.666667	1	0	0.333333	1	0.333333	0.333333	1	0.333333	1	1	0.333333	0	0	1	1	1	0	1	0	0	0.333333	0	0	0.333333	0	0	0
201	0.333333	0	0.333333	0	0	0	1	0.666667	0.333333	0.666667	0	1	1	0	0	1	1	0	0.333333	1	0.333333	0	1	0.333333	0	0.333333	0.333333	1	0	0.666667	1	0	0.333333	0	0	1	1	0.333333	1	0.666667	1	0.333333	0.333333	0	1	1	1	1	0
202	0.333333	1	0.333333	0	1	0.333333	0	1	0.333333	0	1	0	1	0	0	0	0	0	0	0.666667	1	0	0	1	0	0	0	0.333333	0	0.333333	0	0.333333	0.333333	1	0.333333	0.333333	0.333333	0	0	0.333333	0	1	1	0	0.666667	1	0	1	1
203	0	1	0	1	0.333333	1	1	0	0	0	0.666667	0	1	0	0.333333	1	0	1	1	0.666667	1	1	0.666667	0.666667	0	0.333333	0	0.333333	0.333333	0	0.666667	1	1	1	1	1	0	0	0	0	0	0.333333	0	0.333333	0	0.333333	0	0	0
204	0.333333	0.666667	1	1	0.666667	1	1	0	0.333333	0	0.333333	1	1	1	1	1	0	0.666667	1	0.666667	0	0	0.666667	0	1	0.333333	0	0	0	1	0	0.333333	0	0	0.666667	0	0	0.333333	0	0	0	0	1	0	0	0	0.333333	0.666667	1
205	0	1	0	0	0	0	1	1	1	0	0	0	0.666667	1	0	0	0	0	0.333333	1	0.333333	0	0.333333	0.333333	1	0.333333	0	0.333333	0	0.333333	0	0	0	1	0	0.333333	0.666667	1	0	0	0	0	0	0	0.333333	0	0	0	1
206	0	1	0.333333	1	1	0.333333	1	0.666667	0	1	1	0.333333	0	1	0.333333	1	1	0	0.666667	0	0.333333	0.333333	0	0.333333	0	1	0.333333	0	0	0.666667	0	0	0	0.666667	1	0	0	0	0	0	1	0	0	0	1	1	0	0	0.333333
207	0.333333	0	1	0	0.666667	0	0.666667	0.333333	0	0	0	0.666667	0	0.333333	0	0.666667	0	0.333333	0	0	0	0	0.333333	0	0.333333	0	0	1	0.333333	0	0.333333	0	0.333333	0.666667	0	0.666667	1	0	0	0	1	0	0.333333	0.333333	0	1	0	0	0
208	1	1	0	1	0	0.666667	0	0	0.333333	0.666667	1	0.666667	0	0	0.333333	0	1	0	0	0	0	0.666667	0	1	0.666667	1	0	0.333333	1	0.333333	1	1	0.333333	1	0	0	0	1	0	0.333333	0	0	1	1	0	0.333333	0.666667	0	0
209	0.333333	0	0.333333	1	0.333333	0.333333	0.333333	1	0	0.333333	0	0	0.666667	1	0	1	0	1	0.666667	1	0	0.666667	0	0	0.666667	0.666667	0	1	0	0	0	0.666667	0.333333	0.666667	0	0	0	0	0.333333	0	1	0	0.333333	0	0.333333	0.666667	0	1	0.666667
210	0	1	0	0.333333	0	0.333333	1	1	0	0	0	0	0	0.666667	0	0	0	0.333333	1	0	0	0	1	0	0.333333	0.666667	1	1	0	0.666667	1	1	0	0.666667	0	0	0.333333	1	0.666667	0.333333	0	0.666667	0	0	0	0.333333	0	0.333333	0
211	0	0.333333	0.333333	0.666667	1	0	0.333333	0	0.333333	0	0.666667	0	0	0	0.333333	0.666667	1	0	0.333333	1	0.666667	0	0	0.333333	1	1	0.333333	1	0	0.333333	0	1	0	0	0	0.333333	1	0	0	0	0	0.333333	0.666667	1	0	0	0.333333	0.333333	1
212	0.666667	1	0.333333	0.666667	0.333333	0.333333	0.666667	1	0	0.666667	0	0	1	0	0	1	1	0	0.333333	0.666667	1	1	0.333333	0	0	1	0	1	0.333333	0	0	0	0.333333	0.666667	1	0.333333	0	0.666667	0.666667	0.666667	0	0.333333	0.666667	0	0.666667	1	0	0	0.333333
213	0	0	0	0.666667	1	0	0.333333	0	0	0.333333	1	0	0	0.333333	1	1	0	0.333333	0.333333	0	0.333333	0	0	0.666667	1	0.666667	0	0	0	0	0	0.666667	0	0	0.666667	0	0.666667	0	0	1	0	0	1	0	0	0	1	0	1
214	0.333333	1	0.333333	0	0	0.333333	0	0	0.333333	0.666667	0	1	1	0	0	0	1	0	0.666667	1	0	1	1	1	0.666667	1	0.666667	0.333333	1	0	0.666667	1	0	0	0.333333	0	0.333333	1	0	0	0	1	1	0	0.666667	0	0	0.333333	0
215	0.333333	0.333333	0	0.666667	1	1	0	1	0.666667	0	0	0.333333	0.666667	0	0	1	1	0.333333	1	0	0	0	0	1	1	0	0	0	0	0.333333	0	1	0.333333	0	0	0.333333	0.666667	1	0	0.333333	1	0.666667	0.666667	0	0	0.666667	1	1	1
216	0	1	0.333333	0.333333	1	0	0	0.333333	0	1	0	0	0.333333	1	1	0.666667	1	1	1	1	0	1	0	0	0.333333	1	0	0.333333	1	0	0.666667	1	0	1	1	0	0.333333	1	0	0	0.333333	1	1	1	0	0.666667	0	0.666667	0
217	0.666667	0	0.333333	0.666667	0.666667	0	0.666667	0	0.333333	0.666667	0	1	1	0	0	1	1	0.333333	0.333333	1	0.333333	0.333333	1	0.333333	1	1	0.333333	0.333333	0	0.333333	1	0	0.333333	0.333333	0	0	0.333333	1	0.333333	0.666667	1	0	1	0	0	0	0	0.333333	0.333333
218	1	1	0.333333	0	0	0.666667	0	0	0.333333	0.666667	0	0	1	0.333333	0	0	0	0	0	0.666667	0.333333	0.666667	0	0.666667	0	0	0.333333	0.666667	1	0.333333	1	0	1	0.666667	0	0	0.333333	1	0.333333	0.666667	0	0	0	1	1	0.666667	0	0	0
219	0	0	0	1	0.333333	0	0.666667	1	0.333333	0.666667	0	0	1	0.333333	0.333333	0.666667	0	0	0.333333	0.333333	0.333333	0	0	0	1	0.333333	0.333333	0.333333	1	0.666667	0.333333	1	0	0.666667	0	0	0.666667	1	0	0.333333	0.666667	1	1	1	0	0.666667	0	0.333333	0.666667
220	0.333333	0.333333	0	0	1	0.333333	0.666667	1	0	1	0.333333	1	0	1	1	1	1	0	1	0.333333	0.333333	0.333333	0.333333	0	1	0.333333	0.333333	0.666667	1	0.333333	0.333333	0	1	0.333333	0.333333	0	0	0	0	0.333333	0.666667	0	0	0	0.333333	0	0	0	1
221	1	0	0.666667	0.666667	1	0.333333	0.333333	1	0	1	0	1	1	0	0	0	1	1	1	0.333333	0.333333	0.666667	0	0.333333	0.666667	0	0	0.666667	0	0.333333	0.333333	1	0.666667	0	0.333333	0	0.666667	0	0.333333	0	1	1	1	0	0.333333	0.666667	0	0.666667	1
222	1	1	0.333333	1	0.333333	0	0.666667	1	0.333333	0	1	0.333333	0.333333	1	1	1	0	0	0.666667	1	0.333333	0.666667	1	1	1	0	0.333333	0.333333	0.333333	0.666667	1	0	0	0.666667	1	0.333333	0.666667	0	0	0	0.333333	0.333333	0	1	0	0.666667	0	0.333333	0.333333
223	0	1	0.333333	1	1	0	1	0.333333	0.333333	0.666667	0	0.333333	0.666667	0	0	0.666667	0	0.333333	1	1	0	0.666667	0	0	0	0.666667	1	0.666667	1	0	0	0.666667	0	0.666667	0	0.333333	0	0.666667	0	1	0	0.333333	0	0	0	0.333333	0	0	1
224	1	1	0	0	0.333333	1	0	1	0	1	0.333333	0.333333	0.333333	0	0	0.333333	1	0.333333	1	1	0.333333	0.333333	0	0.333333	0.333333	0	0.333333	0.666667	0	1	1	0	0.333333	0.333333	1	0.333333	1	1	1	0.666667	1	0	1	0.333333	0	0	0	0.333333	0
225	0.666667	0	0	0.666667	1	0.333333	0.333333	0.666667	1	1	0	0	1	0.333333	0.333333	0.666667	1	0	0.333333	1	0.333333	0.666667	0	0	0.333333	0.666667	0.333333	1	1	0	0	0	0.333333	0.333333	1	0	0.333333	0.666667	0	1	0.333333	0.333333	0.666667	0	0.333333	0.333333	1	0	0.666667
226	0.333333	1	0.333333	0.333333	1	1	1	0	0.333333	1	1	0	0.333333	0	1	1	0	0	1	0	0	0	0	0.666667	0.666667	0.666667	0.666667	0.666667	0	0.333333	0.666667	1	0.333333	0	0.333333	0.333333	0.666667	0	0.666667	0	0.333333	0	0	0	0.333333	0.666667	1	0	1
227	0.333333	0	0	1	0	0.333333	0	0	0	1	0	0	0	0.333333	0	0	0	0	0.666667	0	0	0	0	0.333333	0	1	0.333333	0.333333	0	0	0	1	1	1	0	0.333333	0	1	1	1	0	0.333333	0.666667	1	0	0.333333	1	0	0.666667
228	1	1	0	0.333333	0	0.333333	0	0	0	0	0	1	1	0	0.333333	0.333333	0.666667	0.333333	0.333333	0	0.666667	1	1	0.333333	0	0	0.333333	0.333333	0	0.333333	1	0	0.666667	0	0	0	0	0	0	0.333333	1	0.333333	0.666667	1	0.333333	0.666667	0	0	1
229	1	1	0.333333	0.333333	0.333333	0.666667	0.333333	0	0	0.666667	0	0.333333	0.666667	0.666667	0	1	0.333333	0.333333	0.666667	0.666667	0.333333	0.333333	1	1	0.333333	0.333333	0.333333	0.666667	0.333333	0.333333	0.666667	1	0.333333	1	0	0.333333	1	0	0	0	0.666667	0.333333	0.666667	0	0	0.333333	1	0.333333	0
230	0	0	0	0	0	1	1	0	0	0.666667	0	0	0.666667	0	0.333333	0.666667	1	0	1	0	0	0	1	0.333333	0	0	0	0.333333	1	0.333333	0	0	0.333333	0.333333	0	0.333333	0	0	0.333333	0.666667	1	0	0	0.333333	0	0.333333	0	0	1
231	0	0	0.666667	1	0	0.333333	0	1	0	0.666667	0.666667	0.666667	1	0.333333	1	0.666667	0	0.333333	0.333333	0	0.666667	0	0	1	1	1	0.333333	0	0	0	1	1	1	1	0	0	0	0	0	0.333333	1	0.333333	0.666667	1	0	1	1	0.333333	0
232	1	0	1	0.666667	0	0.333333	1	0	0.333333	0.333333	1	0.666667	0	0	0	0.333333	0	0.666667	1	1	0.333333	0.333333	0	0.666667	0.666667	1	0	1	0.333333	0	0.666667	0	0.666667	0.333333	0	0	0.333333	1	1	1	1	0.333333	1	1	0.333333	0	0	0.666667	0
233	0	1	0	1	0.333333	0.666667	0.666667	1	0	0	0	0	1	0	0.333333	0.333333	0.333333	0.333333	0	1	0.333333	0.666667	0.666667	0	1	0.666667	0.333333	1	1	0	0.333333	1	1	1	1	0.333333	1	0	0	0.333333	1	0.333333	0	1	1	1	1	0	1
234	0	1	0	0	0	0	1	1	0	0	0	0	0.333333	1	0	1	1	0	1	0.333333	0.666667	0	0	0	0	1	0.333333	1	0.666667	0	1	1	1	0.666667	0	0.333333	1	0	0	1	0	1	0.666667	1	0.333333	0.333333	0	0	1
235	1	1	0	1	1	0.333333	0.666667	1	1	1	0.666667	0	0	0	0.333333	0.666667	1	1	1	0	0	0	0.333333	1	1	1	0	1	1	1	0.666667	1	1	1	1	0.666667	1	0	0	1	1	0.666667	0.666667	1	0	1	0	1	1
236	0.333333	0	1	1	1	0.333333	0.666667	0	0	1	0	0.333333	0.666667	1	0.333333	0.666667	1	1	1	1	0.333333	0.666667	0	0.333333	0.333333	1	0.333333	0.333333	1	0.333333	0.666667	0.333333	0.333333	0.666667	0	0	0.666667	0.333333	0.666667	1	0	0.333333	0.333333	0	0.333333	0	0	0.333333	0.666667
237	0.666667	0	0.666667	1	0	0.333333	0.333333	1	0.333333	0.333333	0	0.666667	0.666667	1	0.333333	1	1	0.333333	0.333333	1	0.333333	0.666667	1	0.333333	1	1	0	1	0	0.333333	0.666667	0	0.333333	0.333333	0	0.333333	1	0	0.333333	1	0	1	1	0	0.666667	1	0	0.333333	0.666667
238	0.666667	0	1	1	0	0.333333	0.666667	1	1	0	1	0.666667	0	0	0	0	0	1	0.666667	0	0.333333	0	1	0.333333	0.666667	1	1	1	1	0	0.333333	0	0	0	0	0	1	1	0.333333	1	0.666667	0	0	0	0	0	1	0.333333	1
239	1	1	0	0	0	0	0	1	1	1	1	1	1	0	0.666667	0	0	0.333333	0	0	0.333333	0.666667	0	0	1	0	0	1	0	0.333333	0.666667	0	0	1	1	1	0.666667	0	0.666667	0.666667	1	1	1	1	0.333333	1	0	0	0
240	0	0.666667	0	0	0	1	1	0	0	0	0	0.333333	0	0	1	1	0	0.333333	0.333333	0.333333	0	0	0	0.333333	0.666667	1	0.333333	1	0	0	1	1	0.666667	0.666667	0	1	1	0.333333	1	1	0	0	0	0	0.333333	1	0	1	1
241	0.666667	0	1	0.666667	0	0	0.666667	0.333333	0.666667	1	0	0	1	0.333333	0	0.333333	1	0	0	0	0	1	0.666667	0.333333	0.333333	0	0.666667	0.666667	1	0	1	0	0	1	1	1	1	0.333333	1	1	1	1	1	0	1	0.666667	0	0	0.333333
242	0.666667	1	0.333333	0.333333	0.666667	1	1	1	0	1	0	1	1	0	0	0.666667	1	1	1	1	0.333333	1	0	0.333333	0.666667	1	0.333333	0.666667	1	0.333333	1	0	0.333333	0	0	0.333333	0.666667	1	0.333333	1	1	0	0	0	1	0.666667	1	0.333333	0.666667
243	1	0	0	0.666667	0	0.333333	0.333333	1	0.333333	1	0	1	1	0.333333	0.666667	0	0	0.333333	0.333333	1	1	1	0	0	0.666667	0	1	0.666667	0	0	1	1	0	1	0	0	0	0	0.333333	0.333333	0	0.333333	1	1	1	1	1	0.333333	0
244	0.333333	0	0	1	0	0	1	0	0	0.333333	1	0.333333	0.333333	1	0.333333	0	1	0.333333	0.333333	0.333333	0	0	0	0.666667	0	0	0	1	0	0	1	0	0	0	1	0.333333	0.333333	0.666667	1	1	0	0	0	0	1	0.666667	1	0.333333	1
245	0.333333	0	0	1	0	0	0	0	0	1	1	0.333333	1	1	1	0.666667	1	1	0.666667	1	0.333333	1	1	1	0.333333	0.333333	0	0	0	0.333333	0.333333	0	1	1	0	0.333333	1	0	0.333333	0	1	0	1	1	0.333333	1	0	0	0.666667
246	0	0	0.333333	0.666667	1	0.333333	1	1	0.333333	1	0	0.333333	0	1	0.333333	1	1	0.666667	1	0	0.333333	0	0.666667	0.333333	0	0	0	0	0	1	1	0.666667	0.333333	0.333333	0	0	0	0	0	0	0	0.333333	1	0	0.333333	0	0.333333	0.333333	0.333333
247	0	0	1	0.333333	0.333333	0	0	1	0.333333	0	0	1	1	0	0	0	0	0.333333	0	0.666667	1	1	0.666667	1	1	0	0	0	0	0	0	1	0.666667	0.666667	1	0	0.666667	1	0	0	0	0.333333	0.666667	0	0.333333	0.666667	1	0.666667	0.666667
248	0.666667	1	0.333333	1	0.666667	0	0	1	1	1	0	1	0.666667	1	0.333333	0.333333	0	0.333333	0	0.333333	0	0	0	0.333333	0.666667	0	1	0.666667	0	0	0	0.666667	0.333333	0	0.333333	1	1	0	0.666667	0	0	0.333333	0.666667	1	1	0.666667	0	1	0.666667
249	0	0	0.333333	0.666667	0	1	0	1	0	1	0	0	0.333333	1	1	0.666667	0.333333	1	1	0	0.333333	0.333333	1	0.666667	0	0	0	0	0	0	1	0	0.333333	0.333333	1	0.333333	0	0	0.333333	0.333333	1	0	1	1	0.333333	0.333333	0	0	0
250	0	0	1	1	1	0.333333	0.333333	0	0.333333	0	0	0.666667	1	0.666667	0	0	0	0	1	0	1	0.666667	1	0.333333	0.666667	0	0	0.666667	0	0.333333	0	0	0.333333	1	0	1	1	1	0	0	1	0	0	1	0	1	0	0.333333	1
251	0.333333	0	0.333333	0.333333	0.666667	0	0	0	0.333333	0.666667	0	0	0.666667	0.666667	0.333333	0	0	1	1	0	0	0	0	0.333333	0	1	0	0	0	0.666667	1	1	1	1	0	0.333333	0	0	0.333333	0.333333	0.666667	0	1	0	0	0	0	0.666667	0.666667
252	0.666667	0	1	1	1	0	0	0	0.666667	0	0	1	0.666667	0	1	1	0	0	0.333333	1	0	0	1	1	1	0	0	0	0	0.333333	0	0	0.333333	1	1	1	1	1	0.333333	0.333333	0	0.333333	0	1	1	0.666667	1	1	1
253	0	0	0.333333	0	0	0.333333	0.666667	1	1	1	1	0.333333	0.333333	0	0.333333	0.333333	1	1	1	0	0	0	0	0	0.666667	1	0.333333	1	0	1	1	1	0.333333	0	1	0.333333	0	0	0	0	1	0	1	1	0	0	0	0	0.666667
254	0	1	1	1	0	0	0	0	0.666667	0	0	0	0	0	0.333333	1	1	1	1	0	0.333333	0	0	0	0.666667	0	0	0	0	0.333333	0	0	0	0.333333	1	1	1	0	0	0	0	0.666667	0.666667	0	0.333333	1	1	1	1
255	0	0	1	0.666667	1	0	0.333333	0.666667	1	1	1	0.333333	0.666667	0	0.333333	0	0	0.666667	1	0	0.333333	0.333333	0	0	0	0	0.333333	0.666667	1	0.666667	1	1	0.333333	0	0	0.666667	0.666667	0	0	1	0	0	0	0	0.333333	0	0	0.333333	0.666667
256	1	0	0	0	0	0.333333	0	1	1	1	0.666667	1	1	1	1	0.666667	0	0	0	1	1	1	0.333333	1	1	1	0	0	0.333333	0.666667	0.666667	0	0	1	1	0	0	0	0.333333	0	1	0.333333	0	1	0.333333	0.333333	0	0.333333	0.666667
257	0.666667	1	0	0	0	0	0.666667	0.666667	0	0	1	0	1	0.333333	0.333333	0	1	0.333333	0	0.333333	1	1	0	0	0	0	0.666667	0	0	1	0.666667	0	0	0.666667	0	0.666667	0	0	0.666667	0.333333	1	0.333333	1	1	0.333333	0.333333	0	0	0.666667
258	0	0.333333	1	1	0	0.333333	0.333333	0	0	0	1	0.333333	0.666667	1	1	1	0.666667	0	0	0.666667	0.666667	0	0	1	1	0	0	0	0	0.333333	0	0	0.333333	0.666667	0	0.333333	0.666667	0	0	0	0	0.666667	0.666667	1	1	1	1	0	1
259	0	0	0.666667	0	0.333333	0	1	0	0	0	0	0.333333	0	1	1	0.666667	1	1	1	0	0	0.666667	0	1	0.666667	1	0	0.666667	1	0.666667	1	0.333333	0.333333	0.333333	0	0.333333	0	1	0	1	0	0.333333	0.333333	0.333333	0.333333	0.333333	0	0.333333	0.333333
260	0.333333	1	0.333333	1	0	0.333333	0.666667	0	0	0.666667	1	1	0.666667	1	0	1	0	0.333333	1	1	1	1	0	0.333333	1	1	0	1	0	0	0.666667	1	1	0.666667	1	0.333333	1	1	0	1	1	0	0	1	0.333333	0.666667	0	0	1
261	1	0	0	0	1	0.333333	0.666667	1	0.333333	1	0	0.333333	0.666667	0	0.333333	0.333333	1	0.333333	0.666667	1	0	1	0	0	0	0	0.333333	0.333333	1	0.333333	1	0	0	1	1	0.333333	0	1	0	1	0	0	1	0	0	0	0	0.333333	0.333333
262	1	0.666667	0	1	0	0.333333	0.333333	1	0.333333	0.333333	0.333333	0	1	0	0	1	1	0	0.333333	1	0.333333	0.333333	1	0.333333	0	1	0.333333	0.333333	1	0.333333	0	0	0	0	0	0	1	0	0	0	0	0.666667	0	0	0.333333	0.333333	0	1	1
263	1	0.666667	0	0	0	0.333333	0.333333	0	0	1	1	0.333333	0.333333	0.333333	0.333333	0	0	0.333333	1	0	0.333333	1	0.666667	0	0	0	1	0.666667	0	1	1	0.333333	1	0.333333	0.333333	0.333333	0	0	0.333333	0.333333	1	0	1	0	0	0	0	0.333333	0.333333
264	0.666667	0	0.666667	0.666667	0	0.666667	1	1	0	0	0	0.333333	0.666667	0	0.333333	1	1	0.333333	1	0	0	0	1	1	1	1	0	1	1	0.333333	0	1	0	0	1	0.333333	0.333333	0	1	1	1	1	0.666667	0	0.333333	0	0	0	0
265	1	0	0	0	0	0.666667	0	0	1	0.333333	0.333333	1	0.333333	0.333333	1	0.666667	1	0.333333	0	1	1	1	0	0	0	0	0	0.666667	1	0	0	1	0.333333	1	0	0.333333	0.333333	0.666667	0.666667	0	0	0	0	0	0	1	0	0	0.333333
266	0.333333	1	1	1	1	0.333333	1	0	0	0.333333	0.666667	0	0	1	0.333333	0.333333	1	1	1	1	0.666667	0	0	0.666667	0	0	0	0	0	0.333333	1	1	0.666667	0	0	0.666667	0	0	0.333333	1	1	0.333333	0.333333	0	0	1	0.333333	1	0.333333
267	1	1	0	0	0	0.333333	1	0	0	0	1	1	1	0	1	0.666667	1	0.333333	0.333333	0.666667	0	0	0	0	1	0	0	0.333333	1	0.333333	0.333333	0	1	1	1	0.333333	1	0	0	0.333333	1	0.666667	1	1	0.333333	1	0	0.333333	0
268	0	0	0	0.333333	1	0	0	0	0.333333	1	0.333333	0.333333	0	1	1	0.666667	0	0	1	1	0	0	0	1	0.666667	0	0.333333	0.666667	0	1	0.333333	0.333333	0.333333	0	1	0	0.333333	1	1	1	0	0	0.333333	0	0	0	0	0	0
269	0	0	0	1	0	0	0.666667	1	0.333333	0.333333	1	1	1	1	0.333333	1	0	0	0.333333	1	0	1	0	0.333333	1	0	0	0	0	0	0.666667	1	0.333333	0.333333	0	0	1	0	0	0.333333	1	0	0	1	0.333333	1	0	1	1
270	0.666667	1	0.333333	0	1	0.333333	0.333333	1	0.333333	0.333333	0	0.333333	1	1	0.333333	0.666667	0	0	0.333333	1	0	0	0	0.666667	0.666667	0	0	0.333333	1	0	1	1	1	0.333333	1	0.333333	0.333333	0	0.333333	0	0	0.333333	0.666667	0	0.333333	0.333333	1	0.666667	0.666667
271	1	1	0.666667	0.666667	1	0.666667	1	1	1	0.666667	1	0	0	1	0	0.333333	1	0	0	0.333333	0	0.333333	0	0	0.333333	1	0	0.333333	0	0.333333	0.666667	0	1	1	0	0	0.333333	1	1	1	0	1	0	1	0.333333	0	0	0.666667	0
272	1	0.333333	0.666667	1	1	0.333333	0.333333	0	0	0.666667	1	0	0	0	0.333333	0.666667	0	0	0.333333	0.666667	0	0	1	0	0	1	0.333333	1	1	0	1	1	0.666667	0.666667	0	0	1	0	1	0.666667	1	0.666667	0	0	0	0	0	1	1
273	1	1	0	0	1	1	0.666667	1	0.333333	0.666667	0	0	0.333333	1	0	0.333333	1	0	1	0.666667	0.666667	0	0	0	0	1	0	0.333333	1	0	0	1	1	0.666667	1	0	0.333333	1	0	1	1	0	1	1	0	0	1	0	0
274	1	1	0.666667	0.666667	1	0	0.666667	0.666667	0	0	0	0.666667	0	0	0.333333	0	0	0.333333	0	0	1	1	1	0	0	1	0	0	1	0	0.666667	0	0.333333	0	0	0	0	1	0	0.333333	0	0	1	1	1	0	1	0.666667	0
275	0.666667	0	0.666667	0	0	0	0	0.666667	0	1	0	0	1	1	1	0.666667	1	0	0.333333	1	0.333333	0.333333	0	0	0.333333	1	0	0	1	0.333333	0.666667	0.333333	0	1	1	0	0	1	0.333333	1	1	0.333333	0.333333	1	0.333333	0.333333	0	0	1
276	1	1	0.666667	0	0	0.333333	0.333333	1	0	0.333333	0.666667	0	0	0.666667	0	0	0.666667	0	0	0	0.333333	0	0	0.333333	0	0	0	1	0.333333	0	1	0	0.666667	0	0	0.333333	0	0	0	1	0	1	1	0.333333	1	0.666667	1	0.666667	0
277	0.333333	0	1	1	0	0	0.333333	0	0.333333	0	0	0.333333	0.666667	0	1	1	0	0.333333	0	0	0.333333	0	0.666667	0	1	1	0.333333	0.333333	0	1	0	0	1	0.333333	1	0.666667	0.333333	0	0	1	1	0.333333	1	1	0.333333	1	1	0	0
278	1	1	0	1	0	0.333333	0	1	0.333333	1	1	0	1	0	0	1	1	1	0	0	1	1	0	1	0	0	0	1	1	0	0.666667	0	1	0.333333	0	0.333333	0.333333	0.333333	0.333333	0.333333	0	1	1	1	0.333333	0.666667	0	1	0
279	0	0.333333	0	1	1	1	0	0	0	0	0	1	0	1	0.333333	0	0.333333	1	0	1	0	0	1	0.666667	1	1	0	0	0	0.333333	0.333333	1	1	1	1	0	0.333333	1	1	1	1	0	0.333333	1	1	1	0.333333	1	0.333333
280	1	1	1	0.666667	0.666667	0	0	1	0	0	0.666667	1	1	1	0	1	1	0	0.333333	0.666667	0	1	1	1	1	0.666667	1	0	1	0	0.333333	0	0	1	1	1	0.333333	1	0	0.333333	1	1	0	0	0	1	0.666667	1	1
281	0.333333	0	0	0	0.333333	0.333333	1	1	1	0	0	0	0.333333	1	1	0.333333	1	1	1	1	1	0.333333	0.333333	0.666667	0.333333	1	0	1	1	1	1	1	0	0.333333	1	1	1	1	1	0	1	1	0	0.666667	0	1	1	1	1
282	0	1	1	1	0.333333	0.333333	1	0	1	1	1	0.333333	1	1	0	0.333333	0	0	0.333333	0	1	0	0	1	0	1	0	0	0.666667	0	0	0.666667	1	0	0.333333	0.666667	0	0	1	0	0.333333	1	0	0.333333	1	0	0	1	0
283	0.333333	0	0	0.666667	0	1	0.666667	1	0	0	0	0	0.333333	0	0	0.333333	0	0.333333	0.666667	0.666667	0	0.333333	0.333333	1	0	0	0	0	0	1	0.666667	1	0	0.333333	0.666667	0	0	0.666667	0	0	0.333333	0	0.333333	0	0	0.333333	0.666667	0	0.333333
284	0	0	1	0	0	0.333333	0	0	0.333333	0	0	0	0.333333	0	0	0.666667	0	0	0.333333	0	0.333333	0	0	0	0.666667	0	0.333333	0	0	0	0	0	1	0.333333	0	0	0.333333	0.333333	1	0	0.666667	0	0.333333	0	0	0.333333	0.666667	1	0.333333
285	0.666667	0.333333	0	0.333333	0	1	0	0	0	0	0.666667	1	0.333333	0	0.333333	0	0	0	0	0	0	0.333333	0	0	0	0	0	0.333333	1	0	0.333333	0	1	0	0	0	0	0	0	1	0	1	0.666667	0	0	0.333333	0	0.333333	0
286	0	0	0	0.333333	0.666667	0	0.333333	0	0	0	0.666667	0.333333	0	0	0	0	0	0.333333	0.666667	0	0	0	0.666667	0	1	1	0	0	0.666667	1	0	0.333333	1	0.333333	0	0	0.333333	0	0	1	1	0	0	0	0.333333	0	0	0	0
287	0	1	0	0	1	1	0.666667	0.666667	0	0.333333	0.666667	0	0.333333	0	0.333333	1	0	1	0	0	0	0.333333	0.333333	0	0	0	1	1	0	1	1	0	0.666667	0	0.666667	0	0	0	1	0.333333	0	1	0.333333	1	0	1	1	0	0.333333
288	0	0.333333	0.666667	1	0	1	0.333333	1	0	0.666667	1	1	0	0.333333	1	1	1	0	0.666667	0	0	0.333333	1	1	0.666667	0	0	0	0	1	0.333333	0.666667	0	0	0.333333	1	1	1	1	0.333333	0	0.666667	0	0	1	0.333333	0	0	0
289	0.333333	0.666667	0	1	1	1	0	0.666667	1	0	0	0	0.333333	0	0.666667	1	1	0	0	1	1	0	0	0.666667	0	0	0.333333	1	1	0.333333	0	0	0	0.333333	0	0	1	1	1	0	0.333333	0	0	1	0	0.333333	0	0.666667	1
290	1	0	1	1	1	1	0.333333	1	0	0.333333	0.333333	1	1	0.666667	0	0	0.333333	1	0.333333	0.333333	1	0.666667	0	0	0	0.666667	0	0	0.666667	0	1	0	1	0.666667	0	0	0	1	1	0	0	1	0	1	0	0.333333	0	1	0.333333
291	0.333333	1	1	0.666667	0	0	0.333333	0	1	0	0	1	0	1	1	0	0	0.333333	0	0.333333	1	0.333333	1	0	0.333333	0	1	0	0	1	0	1	0.333333	0.333333	0	0.333333	1	1	1	1	1	0.666667	1	0.666667	1	1	1	0.666667	0
292	0	0	1	1	0	0.333333	0	1	0	1	0	1	0	0	0.333333	0	0	0	0	0	0.333333	0	0.666667	0.333333	1	1	1	0	1	1	1	0	1	1	0	0.333333	0.333333	0	0	1	0	0.333333	0	1	0.333333	1	0.666667	1	1
293	0	0	0	0.333333	0.333333	0	0	0.333333	1	0.333333	0	1	0	0	1	1	1	0.333333	0.333333	1	0	0	1	0	0.333333	0	0.666667	0	1	0	1	0	0.666667	0.666667	1	0	0	0	0	0	0	1	0.333333	0	0	0	0	0	0.333333
294	1	1	1	0.666667	0	1	1	1	1	0.666667	0.666667	0	0.333333	1	0	0	0	1	0.666667	0.666667	0	1	1	0.666667	0.333333	0	1	0	0.333333	1	1	1	0	1	0.666667	1	0	1	1	0	0	0	0	0	0	0.333333	0	0	0
295	0	0.666667	1	0.333333	1	0	0.333333	0	1	0	1	0	0.333333	1	0	0	0	0.666667	1	1	0	0.333333	0.333333	0.666667	0.333333	0	0	1	1	1	0.333333	0	0.666667	0	1	1	0	0	0	0	0	0	0.333333	0	0	0.333333	0.333333	0	0.333333
296	0.333333	0	0	0	1	0	1	0.666667	0	1	1	1	0	0	0	0	0.666667	0	1	1	1	0.666667	1	0.333333	0.666667	0.666667	1	0	0	0.666667	1	1	0	1	0	1	0.333333	0	0.666667	0.333333	0.666667	1	1	0.666667	1	1	0	1	1
297	0.333333	0	0.333333	1	1	0	0	0	0	0	0	1	0.666667	0.666667	0	0	1	0.666667	0.333333	0	0	0.333333	1	0	0.333333	1	0.333333	0.333333	0.666667	0	0	1	0.333333	0.666667	1	1	0.333333	0	0	0	0	0.333333	1	0.333333	0.333333	0.333333	1	0	0.333333
298	0.666667	0.666667	0	1	1	0	0.666667	0.333333	0	1	1	0	0	1	0	0.333333	1	0	0	0.666667	1	0.333333	0.333333	1	1	1	1	0.333333	0.333333	0.666667	1	0	0.666667	0	0	1	0.333333	0.333333	0	1	1	0	0.333333	1	1	0	0.666667	0	0
299	0	0.333333	1	0	0	1	0	0.666667	1	0.666667	0	0	0	0.666667	0	0.333333	0.666667	0	0.333333	0.333333	0	0	0.333333	0	0.333333	0	0	0.333333	0	0	0.333333	0	0.666667	0	0.333333	0	0.333333	0	1	0	1	1	0.333333	0	0.333333	0	1	0	0
300	1	0	0.666667	0	0.333333	0	0.333333	0	0	0.666667	1	0.333333	0	0	0.333333	0	1	0	0.333333	0	0.333333	0	0.666667	0	1	1	0	0	0	0	0	0	0	0.333333	0	1	0	0.666667	0	0	0	0	0	0.333333	1	0	0	1	0
301	1	1	0	0	0	0	0.333333	0	1	0	0	1	0	0.333333	0	0.666667	0.666667	1	0	0	1	0	0.666667	0.666667	0.666667	0	0	0	0.666667	1	0	0	0	1	0.666667	1	0	0	0	0	1	0	1	0	1	0	0.666667	1	0.333333
302	0.333333	0	1	0	0.666667	0	1	1	0	1	0	1	0	0	0.333333	0	1	0	0.333333	0.666667	1	0	0	0	0	0	1	0.666667	1	1	1	1	0	0.333333	0.333333	1	0	0	0.333333	0.333333	0.333333	1	1	0.666667	0	0	0.333333	0.333333	1
303	1	0	1	0	0	1	0	1	0	0.666667	0.666667	0.666667	0.333333	0	0	0	0	0.666667	0	0	0	0	0	0	0.333333	1	0.666667	0	1	1	0.333333	0.333333	1	0	0	0	0	0	1	0.666667	0.666667	1	0	0	1	0	1	0	0
304	0.666667	0	0	0	0	0.333333	1	1	0.333333	0.333333	1	0.333333	0	1	0	0.666667	0.666667	1	0	0.333333	1	0	0	0	1	0.333333	0	0	0	0	1	0	0	1	0	1	1	0	0	0	0.666667	0.333333	0.333333	0.333333	0	0	0	1	0
305	0	1	1	1	0.666667	0	0	1	0.333333	0	0	0.333333	0.333333	0	0	1	0	0	0.666667	1	0.666667	1	1	1	0.666667	0	0.333333	0	0	0.333333	0.666667	1	0	1	0	0.333333	0	0.666667	0.333333	0.333333	0	0.333333	1	1	0.333333	0.666667	0	1	0
306	1	0	1	0.666667	0	1	1	0	0.333333	1	0	0.333333	0	0	0.666667	0.666667	1	0	0	0	0.666667	0	0	0.666667	1	1	0	0	0	0.333333	0	1	0	1	0	0	0	1	0	1	1	0	0	0	0	0	0	0.333333	0.333333
307	1	1	0.666667	1	0	0	1	1	0.333333	0	1	0	1	0	0.333333	0.666667	0	1	0	1	0.333333	0	0.333333	0	0.333333	1	0	0	0	0	0	0	0.333333	0	0	0.333333	0	0.333333	0	0.666667	0	0	1	0	1	1	1	0.333333	0
308	0.333333	0.333333	0.333333	0	0	0	0.666667	1	0	0.333333	0	0	0.333333	0.333333	0	0.333333	1	0.333333	0	0	0	0	0.333333	0	0.333333	1	0	0	0.333333	0	0	0	0.666667	1	0	0	0.666667	0	1	1	0.333333	1	0.666667	1	1	0.333333	0.666667	0	0.333333
309	1	1	1	0	0.666667	0	1	0.333333	0.333333	0	0	0.333333	0	0	1	0.666667	0	0.333333	0	0.333333	0.333333	0	0	0.666667	0	0	1	0	1	0.666667	0	0.333333	1	1	1	0	0	0	0.333333	0	0	0	0	1	0	0.666667	0	0.333333	0.666667
310	1	1	0.333333	0	0	1	0	1	1	0	0.666667	1	0.333333	1	0	0	0.333333	0.666667	0	0	1	0.333333	0.333333	0	0	1	0	1	0	0.666667	0.666667	0.666667	1	0	1	1	0	0.666667	0	0	0.666667	1	1	0	0.333333	0.666667	1	0	0
311	0	0	0.666667	1	1	0.333333	0.666667	1	0	0	0	0.333333	1	0	0	1	0	0.666667	0	1	0	0	0.333333	0	0.666667	0	0	0	1	0	1	0	0.666667	1	0	0.333333	0	1	0	1	0.333333	0	1	0	0	0	0	0	0
312	0	0	0	0.666667	0	0.333333	0.666667	0	0	0.666667	0	0	0	0	0.333333	0.333333	1	0.333333	0.333333	0	0.333333	0	0.666667	1	1	0	1	1	1	0	0.333333	0	0.333333	1	0	0	0.333333	0.333333	0	1	0.333333	0.333333	0	1	0	0	1	0	0
313	1	0.666667	0	0	0.333333	0.666667	1	1	0.333333	0.333333	1	0	0.666667	1	0	0	1	0.333333	0.666667	0	0	0	1	0.333333	1	0	1	0	1	0	0	0	1	1	0	0.333333	0	1	0	0.333333	1	0	1	0	1	1	0	0.333333	0
314	1	1	0	0.666667	0	0	0.333333	1	0	0.333333	1	1	1	1	0	0	1	0.333333	0	1	0.333333	0.666667	0	0.333333	1	0	0	0.666667	0	0	0.333333	1	0.333333	1	0	0	0	0	0.333333	1	1	1	1	0	0.333333	0.333333	1	0	0
315	0	0	0	0	1	0	0.666667	0	0	0	0	0.333333	0.666667	0.333333	0.666667	0.666667	1	0	1	0	0	1	1	0.333333	0.333333	0.333333	0	0.666667	0	1	0	1	0	0	0	0	0	0	0.333333	0	1	0.333333	0.666667	1	0.333333	0	1	0	0
316	1	0	0.666667	0	0	0	0	0.333333	0	1	1	0	0	0	0.666667	0	0	0.333333	0	1	0.333333	0	0	0	0	0.333333	0	1	0	0	0	0	0	0	1	0.333333	0.666667	1	0	0	0	0.333333	0	0	0.333333	0.666667	1	0	0
317	0	0	0.333333	0.666667	0	0	1	0.333333	1	1	0.666667	0	0	1	0	0.333333	1	0.333333	0.333333	0	0.333333	0	0.333333	0.333333	0	0	0	0.666667	0	0	1	0	0	0.333333	1	0.333333	1	0	0.333333	0	1	1	0.333333	1	0.333333	0.666667	0	0.333333	1
318	0.333333	0	0	1	0	0	0.333333	0	0.333333	0.666667	0	0.333333	0.333333	1	0.333333	0	0.666667	0	0	0	0.333333	1	0	0	0.333333	1	1	1	0	0	0	0	0	0.333333	1	0	0	0	0.333333	0	0	1	0	1	1	0	1	0.333333	1
319	0.666667	1	0.666667	0	1	0	0.666667	0	0.666667	1	0	0.333333	0	1	1	0.666667	1	0	0.333333	0	0.666667	0.666667	0.333333	0	0	0	0	1	0.333333	0	0	0.333333	0.666667	1	0.333333	0	0	1	0	1	0	0.333333	0.333333	0.333333	1	0.666667	1	1	1
320	0.333333	0.333333	0	0.333333	0.333333	0	0	0	1	1	1	1	0	1	0	0	1	0	0	1	0.333333	0	0.666667	1	0.333333	0	1	0.333333	0.666667	1	0	0.333333	0	1	1	1	0	0	1	0.333333	0.333333	0	0	1	1	0.333333	0.666667	1	0
321	0.333333	0	0	0	0	1	0	1	0.333333	0	0	1	0	0	0	0	0.333333	1	0.333333	1	0	0.333333	0.666667	0	0	0	1	0.333333	0.333333	0.666667	0	0.666667	1	1	1	1	0.333333	0.333333	0	0	1	0.333333	0.333333	0.333333	1	1	0.333333	1	0.333333
322	0	1	0	0	0.666667	0	0.333333	0.666667	0	0	0	1	0.333333	0.333333	0	1	1	0	0	0	0	0.333333	1	0	0	0	1	0.333333	0.333333	0.666667	1	0	1	0	0	0	0.333333	0	1	0.333333	0	0	0	1	0	0.666667	0	0.333333	0.333333
323	1	1	0	0.333333	0	0.333333	0	0	1	1	1	0	0	0.666667	0	1	1	0	0	0	0	0.333333	0	0	0.333333	0	1	1	0	1	1	1	1	0	0.666667	1	1	1	1	1	0.666667	0	0.333333	0	1	0.333333	0	0	0.333333
324	0.333333	0	0	1	0	1	0	0.333333	0	0.666667	0	1	0	0	0.333333	0.666667	0	1	0	0	0	0	1	0	0.333333	0	0	0	0.666667	1	0.666667	0.666667	0	0	0	0.333333	0.333333	0	0	1	1	0.333333	0	0	0.333333	0.666667	0.666667	0	0.666667
325	0.333333	0	1	0	0	1	0.333333	1	0.333333	0.666667	1	0	0.333333	1	0	0.333333	0.666667	1	0.333333	1	1	0	1	0.333333	0.333333	0.333333	0	0.333333	0.666667	1	0.333333	0	0	1	1	1	0.333333	1	0	0.333333	1	0	0	1	1	0.333333	0.333333	0.333333	0
326	0.333333	0.666667	0.666667	0	0	0	0.666667	0.666667	1	0	1	1	1	0.666667	0.666667	1	0.666667	0	0	0	0.333333	1	0.333333	0	0	0	0.666667	1	1	1	1	0.333333	0	0	0	0.666667	1	0.333333	1	0	0.333333	0	0	1	1	0	0	0	0
327	0	0	0	1	0.333333	0	0	1	1	0.333333	0.333333	0	0.666667	0.666667	1	0	0	0	0.333333	0.333333	0.333333	1	1	0.666667	1	1	1	1	1	1	0	1	1	1	0.333333	0	1	1	1	1	0.333333	0	0	0	0	0	0.333333	0.333333	1
328	0	0	0	0.666667	0.333333	0.666667	0	0.333333	0	1	0.333333	0.333333	0	0	0.666667	0	0.666667	1	0	0	0	0	0	0	0	1	0.333333	1	0.333333	0	1	0	0	0.333333	0.333333	1	0.333333	0.666667	0	0.333333	0.333333	0.666667	0.333333	1	0	0.666667	0	0	0
329	0	0	0	0.333333	0.333333	0.666667	1	0	1	0	1	1	0	0	0.666667	0	0.666667	0.666667	1	0	0.333333	0	1	0	0.666667	0	0	0	0	0	0	0.333333	0.666667	0	0.333333	0.666667	1	1	0	1	0	0.666667	0	0	0	0.666667	0	1	1
330	0	0	1	0	0	0	0	0.333333	0	0.666667	1	1	0	0	1	0	0.333333	0.666667	1	0	0.333333	1	0	0	0.666667	1	1	0	1	0.666667	1	0.666667	0	0	0	0.333333	1	0.333333	0.666667	0	0	0	0	0.333333	0	0.333333	0.666667	1	1
331	0	1	1	0	0	1	0	0	0	0	0.333333	0	0	0	0.666667	1	0	1	1	1	1	0.333333	0.333333	1	1	0.666667	0	1	0.666667	0.666667	0	1	0	1	0	0.666667	0	0	0	0	0.333333	0	0	0.333333	1	1	0	0.333333	1
332	1	0.333333	1	1	1	0.333333	0.333333	0.666667	1	1	0.333333	0	0	0	0	1	0	0.333333	1	0	0.333333	0	0.666667	1	1	0.333333	1	1	0	0	1	1	0	1	0.333333	0	0	1	1	1	0.333333	0	1	0.333333	1	0.333333	1	1	0
333	1	0.333333	0	0	0	0	1	0	1	0	0	0.666667	0.666667	0	1	0	0.333333	0	1	0.333333	0.333333	0	0	0	0.666667	0	1	0	0	0	0	0	0.333333	0.333333	1	0	0.333333	0.333333	1	0.333333	0	1	1	0	1	0	1	0.333333	0.333333
334	0.666667	0.666667	1	0	1	0	0.666667	0.666667	0	1	1	0	1	1	1	1	1	0	0	0.666667	0	0.333333	0	0	0.333333	0	0.333333	0.333333	0	0.333333	0.333333	0	0.666667	1	0.666667	1	0.333333	1	0	0.666667	0	1	0.333333	0	0	0	0.333333	0.333333	0
335	1	1	1	0.666667	0	0	0.333333	0	1	0.333333	1	0.333333	0	0.333333	0.666667	0	0.666667	0	0.666667	1	0	0.333333	0	0	0.333333	0.333333	0.333333	0.333333	0	0.666667	1	1	1	0	1	1	1	0	1	0.333333	0	1	0.333333	0.666667	0	0	0.666667	0	0
336	0.333333	0	0.333333	0.666667	0	0.333333	0	1	0	0.333333	0.666667	1	0.333333	0	0	1	1	0	0	0	0	0.666667	0	0	0.666667	1	0	0.333333	0.333333	0	1	1	0	0.666667	0	0	0	0	1	0	0	1	1	1	0	0	0.333333	0.333333	0
337	0.666667	0	0	0	0.666667	1	0	0.333333	0.666667	1	0	1	0.333333	0.333333	0	0.333333	0	0	1	0	1	0.666667	1	0	0.333333	0	0	1	0.333333	0.333333	1	1	0.333333	0.333333	0.333333	0	0.333333	0	0	1	0.333333	0.666667	0	0	0	0.333333	0.333333	0	0.333333
338	0.666667	0	0	0.666667	0.666667	0	0	0.666667	1	0	0	0	1	0.666667	0.333333	0.333333	1	1	0.333333	0.333333	1	0	1	0.333333	0.333333	1	1	0	0.666667	0	1	1	1	0	0	1	0.333333	0.333333	1	0.333333	0.666667	1	0.666667	0	0	0.333333	0.333333	0	0
339	0	0	0	0.333333	0.333333	0	0	0.666667	1	0	1	1	0.333333	1	1	0	0.666667	0	0	0.666667	1	0	1	0	0.333333	0.666667	1	0	0.666667	0	0.333333	0	1	0.333333	0	0	0	0	0	0.666667	0	0.333333	0	0.333333	0.666667	0	1	0	0.333333
340	0.666667	1	1	0.333333	0	0	0	0.666667	1	0	0	0	0	0.666667	1	0	1	0	0.333333	0.333333	0	0.333333	0.666667	0	0	0	1	0.333333	0	0	0	0.666667	0	0.333333	1	0	0.333333	0	1	0	1	1	0	0	0	0.333333	0.666667	0	0.333333
341	0.333333	0.666667	0	0.333333	0.333333	0	0	0.666667	1	0	1	0	0.333333	0.333333	0	0	0	1	0.333333	1	0	1	0.666667	1	0	0	1	0	0	0.666667	0	0.666667	1	0	1	0	0	0.666667	1	0.333333	1	1	1	1	0	0.666667	1	0	0.333333
342	0.333333	0.333333	1	0.333333	1	1	0	0	0	1	0.666667	0	0.333333	1	1	1	0.666667	1	0	0	1	0	0	0	0.333333	0	0	0.333333	0	1	1	1	0.666667	0	0.333333	0	0.333333	0.333333	1	0.333333	0.333333	0	0	0.666667	0	0.333333	0	1	0
343	0.333333	0	0	0.666667	0	1	1	1	1	0	0.333333	0	0.333333	0	0	0	0.333333	0	0.333333	1	1	0.666667	1	1	0.333333	1	0	0.333333	0.666667	0	0.333333	0	0.333333	0.666667	0	0	0.333333	0	0.333333	0.333333	0	0.666667	0	0	0	1	1	0	0
344	1	0.666667	0	0.333333	0	0.666667	1	0	1	0	1	0	0	0.333333	0	1	0.333333	0.333333	0.333333	0.666667	1	0	0	0	0.333333	0	0	0.333333	1	0	0.333333	0	1	0.333333	0.333333	0	0.333333	1	0.333333	0.333333	0.333333	0	1	0	1	0.333333	0.666667	1	1
345	0.333333	0	0	1	0.333333	0.333333	0	0	1	0.333333	0.333333	0	0.333333	0.666667	0	0.333333	0.333333	0.333333	0	0.666667	0	0.333333	1	0	0	0	0	0.333333	1	0	1	1	0	0	1	0	0.666667	1	0	0.333333	0	1	0	0	0	0	0	0.666667	0
346	0	0.666667	0	0.666667	0	0	0.333333	0	0	1	1	0	0	1	0	0.333333	0	1	0	0	0.333333	0.333333	1	0.666667	0.666667	0	0	0.333333	0	0	1	0	1	0	1	0	1	0	1	0.666667	0.666667	0	1	1	0.333333	0	0	1	0
347	0.333333	0	0	0	0	1	0	0.333333	0	0.333333	0	1	0.333333	0.333333	0.333333	0	0	0	0.333333	0.666667	1	0.666667	0.666667	1	0	1	0.666667	0.333333	0.333333	1	0.333333	0.666667	0	1	1	0	0.333333	1	1	0	0.666667	0	0.333333	1	1	0.333333	1	0.333333	0
348	1	1	0	0.666667	1	1	0	1	1	0	0	1	0.333333	1	0	0	0	0	0.333333	0.666667	1	0	0.333333	1	1	1	1	0	1	0	1	1	1	0	0.333333	1	0	0	1	0.333333	0.333333	0.666667	1	1	1	0	0.333333	1	0.333333
349	1	1	0	0	0	0.666667	0	0	1	0.666667	1	0	0	0	0	0	0.666667	1	0	0	0.333333	0	1	0	0.333333	0	1	0	0	0	1	0	1	1	1	0	0.333333	0	1	0	0	0.333333	0	1	1	0.333333	0	1	1
350	0.333333	1	0.666667	1	0.666667	0	1	0	0.666667	0	0	1	0.333333	0.666667	1	0	1	0	0.666667	0	0.333333	0.333333	0.666667	0.333333	0	1	0	0.333333	1	0	0.333333	0.333333	0.666667	1	0.666667	1	0	1	0.333333	0	1	0.333333	0.666667	1	0.333333	0	0.666667	0	0.333333
351	0.333333	0	0	0.333333	0	0.666667	1	1	1	1	0.666667	1	0	0	1	0.666667	1	1	0	0.666667	1	0	1	0	0	0	1	0.333333	0	1	0.333333	1	0	0	0	0	0.333333	0	0	0	0	1	0	1	0	0	0	0	1
352	0.333333	1	0.333333	0.333333	1	0.666667	0.333333	0.333333	0	0	1	0	0.333333	0.333333	0.333333	0.333333	0	0	0	1	0	0.333333	1	1	0	0	0.666667	0.333333	0	0.333333	0.333333	1	0.333333	0.333333	1	1	0.333333	0.333333	0	1	0.333333	0	1	0	0.333333	0.666667	1	1	0.666667
353	0	0	0.333333	0	0	0	1	0.333333	0.666667	1	1	0.666667	1	1	0	0.666667	0	1	1	0	1	0.666667	1	0.666667	0.666667	1	0	1	0.666667	1	0	1	0.333333	0	0	0.666667	0	0	1	0.666667	1	0	1	0.666667	0	1	0	0	1
354	0	1	0.333333	0	0	0.333333	0.666667	1	0	1	0	0.333333	0.333333	0	0	0.333333	0.666667	0.333333	0	0	1	1	1	0.333333	0	1	0	0	1	0.666667	1	0	0.333333	0	0	1	1	0	1	1	0	0	0	1	0	0	0	0.333333	0
355	0	0	1	1	0	1	1	0.666667	0.666667	0.666667	1	0.666667	0	0.333333	0	0.333333	1	0.333333	0.666667	0.333333	0	0.666667	0	1	0.333333	0.333333	0.333333	0.333333	0	0.666667	1	1	0.333333	0	0	1	1	1	1	0.333333	0.333333	0.333333	0	0	0	0	1	0	0.333333
356	0.666667	0.666667	0	0.666667	1	0	0	1	0	1	0	0.333333	0	1	0.333333	0	0	0.333333	0	1	0	1	0	0.333333	0	0	0.333333	0.666667	1	0	0.333333	0	0	0.333333	0	0	0.333333	0	0	0	0.333333	0.333333	1	0.666667	0	1	1	0.333333	0.666667
357	0.333333	1	0	0	0	1	0	1	0	1	1	0	1	0.333333	0	0.666667	0	0.666667	0.666667	1	0	0	0	0	0.333333	0	0	1	0.333333	0.333333	0.666667	1	0	1	0.333333	0	1	0	0.666667	1	0.666667	0.666667	0	0	1	0.666667	1	1	0
358	0	0.666667	0	1	0	0	0	0	0	1	0	0	0	1	0.333333	0	0	0	0	1	0	1	0	1	0.666667	1	0.666667	0.666667	0	1	0	1	0	0.666667	1	1	1	1	0.333333	0.333333	1	0.333333	1	1	0.333333	0	0	1	1
359	0	0	0.333333	0.333333	1	1	1	1	0.666667	0.666667	1	0	0	0	0.333333	0	1	1	1	0	0.333333	0	0	0.333333	0	1	1	1	0	1	0	1	0	0	0.333333	0	0.333333	0	0.333333	1	0	0	0	1	0.333333	1	1	0	1
360	0	1	1	1	0	0.333333	0.666667	1	0.333333	1	0	0	0.333333	1	1	0	1	0	0	0.333333	1	1	0	0.333333	1	1	1	0.666667	1	1	1	0	1	1	0.333333	0	0	0	0	0.333333	1	0	0	0	0	0.666667	0.666667	1	0
361	0.666667	0.333333	0.333333	0.666667	0	0	1	1	0	1	0.333333	0	0.333333	0.666667	0.333333	0	0	0.333333	0	0	0	1	0	0	0.666667	1	0.333333	1	0	1	0	1	0.666667	0.666667	0.333333	1	0	0.666667	0	0.666667	0	0	0.333333	0.666667	0	0	0	0.333333	0
362	0.333333	1	0.333333	1	1	0	0	0	0.333333	0.666667	0.666667	0	0	0.333333	1	1	1	0.333333	0.666667	0	0.666667	1	0	0.333333	0.666667	1	0.666667	0	1	0	0	0.666667	0	1	0.333333	0	0.333333	0.666667	1	0.666667	0	0.333333	0	0	0	0.666667	0	1	1
363	0.666667	0	0	0.333333	0	1	0	0.333333	0.333333	0	0.333333	0.333333	1	0.333333	0.333333	0.666667	0	1	0	0	0	1	0.333333	0.333333	0.666667	1	0.333333	0	1	0.333333	0	0	0.666667	0	0	1	1	1	1	0	0.666667	0	0.666667	0	0	1	0	0.666667	1
364	0.333333	1	0	0	0	0.333333	0.666667	1	0	0	0.333333	0	1	1	0.333333	0.666667	1	0	0	1	0.333333	0.666667	0	0.333333	0.333333	0	0	1	0.333333	1	1	0	0.333333	0.333333	1	0	0	0.333333	1	0.666667	0	0.333333	1	0	0	1	1	1	1
365	0	0	0.333333	0.666667	0	0.333333	0.333333	1	0.333333	0	1	0.333333	0.333333	1	0.333333	0.333333	0	0.333333	0.333333	0	0	0	0.666667	1	0	0.666667	1	0	1	0	0	1	0.666667	0.666667	0	0	0.666667	0	0.333333	0	0	0.333333	0	0.666667	0.666667	0	0	0	0.666667
366	0	1	0	0	0	0.333333	1	1	1	0.333333	0.333333	0.333333	0	0	0.333333	0.333333	0.333333	0	0	1	0	1	0	0	0	1	0.333333	0.666667	1	1	1	1	0.333333	0	1	0	0	1	0.333333	0	1	0.333333	0	0	0	0	1	0	0
367	1	1	0	1	1	0.333333	0.666667	0	0	0.666667	0	0.333333	0.666667	0	1	0.333333	1	0	1	0.666667	0.666667	0.666667	1	0.333333	0.333333	1	1	0.666667	0.333333	0	1	0	0.333333	0.333333	1	0.333333	0.333333	0	1	1	1	0	0.666667	0	0.333333	1	1	0	0.333333
368	1	1	0	1	0	0.333333	0	1	0	0	1	0.333333	0	0	0.333333	0.333333	0	0.333333	0	1	0	1	0.333333	0	1	1	0.333333	0.666667	0	0.333333	1	1	1	0.333333	1	0	0	0	0	0.333333	0.666667	0.666667	0.666667	1	0.333333	0	0	0	0.666667
369	0	0	0.333333	1	1	0.333333	0	1	0	0	1	0.333333	0.333333	0	0.333333	0.666667	1	0	1	0.333333	0	0	0	0.333333	0	1	1	1	0.333333	1	0	1	1	1	0.333333	0	0	0	1	1	1	0	1	0.666667	0	1	0	0.333333	0
370	1	0	0.333333	0	0.333333	0	0	0	0.333333	1	0.333333	0	0.666667	0	1	1	0	0.333333	1	1	0.333333	1	1	0.333333	0	0.666667	0.666667	0.666667	1	0	0.666667	0	0.333333	0.666667	1	0	1	1	1	1	1	0.666667	1	0	0	0.666667	1	0	0
371	0	0	0	0	0	0	1	0	1	1	0	0	0.666667	0	0	0	1	0	1	1	0	0	1	0	0	0	0.666667	1	0	0.333333	0	0.666667	0	0.666667	1	0	0	0	0	1	0	0.333333	0	1	0	0.666667	0	0	0.666667
372	1	0	0	0.666667	0	0	0.333333	0.666667	0	0	0.666667	0	1	0	0.333333	0	0	0	0.666667	1	0	0.666667	1	0	0	0	0	0.666667	0	0.333333	0	0.333333	0.666667	1	0	0	0	0.666667	0	0.666667	1	0	0.333333	0	0	1	1	0.333333	0
373	0	0.333333	0	0	0	0.666667	0	0	0	0	1	0	1	1	0	0	0	0	1	1	0.333333	0	0.666667	0.666667	0	0	1	1	0	0	1	0.666667	0.333333	0.666667	0	0.333333	0.333333	1	0.333333	0.333333	1	1	0.666667	0	0	0	1	0.333333	1
374	0	0	0	1	0	0	1	0	0	0.666667	0	0	1	1	0.333333	0	1	0.333333	0	1	1	0.333333	0.333333	0.333333	1	1	0.333333	0	0.333333	0.333333	0	1	0.333333	0.666667	0	0.333333	0	0	0	0	1	0.333333	0.333333	0	1	1	0.666667	0	0
375	0.666667	0	0.666667	0	1	0	0.333333	1	1	1	0	1	1	0	0	0.666667	0	0.666667	0	0.333333	0	0.333333	0	0	1	0	0.333333	1	1	0.333333	1	0	0	0	1	0	1	1	0	1	0	0.333333	0	1	0.333333	0.666667	1	0	0.666667
376	0	1	0.333333	0.666667	0	0.333333	1	1	0	0.666667	0	0	0	0.666667	1	1	1	0	0	0	0	1	1	0	1	0	0.333333	0	1	0.333333	0	1	0	0	1	1	0.666667	1	0	1	0	0.333333	0	0	0.333333	1	1	0	0.333333
377	0.333333	0.333333	1	0.666667	0	0.333333	0	0	1	1	0	0	0	0.666667	0.333333	1	1	1	0	1	0.333333	1	0.333333	0	1	0	0	0	1	0.333333	0.333333	0	0	0	1	0.333333	0.666667	0	0.333333	0	0	0	0.666667	1	0.666667	0	1	1	1
378	0.666667	1	0.333333	1	0	0.333333	0	1	0.333333	0	1	0	0	0.666667	0	0.333333	0	0.333333	1	0.333333	1	0.666667	1	0.333333	0	0	0	1	0.333333	0	0.666667	1	0	0.666667	1	1	0	1	1	0.666667	0	1	0.666667	1	0	0	0.333333	0	0
379	0.666667	1	0	1	1	0	0.333333	0.666667	0	0.333333	1	0	1	0	0.666667	0	0.333333	0.666667	1	1	0	1	0	0.333333	0	1	0	0.666667	0.666667	0	0.333333	1	0	1	0	0	0.333333	1	0	1	1	0	0.666667	0	0.333333	0	1	0.333333	0.666667
380	1	1	0	0.666667	0	0	0.333333	1	0.333333	0	1	0	0	0.333333	1	1	0	0.333333	0	1	0.333333	0.333333	0	0.333333	1	0	1	1	0	0.333333	0	0.333333	0.333333	0	0	0	1	0	0	1	0.333333	0.333333	1	0	0.333333	0	0	0	1
381	0.333333	0	0	0.666667	1	0	0	0	0.333333	0.333333	0	0	1	0	0	0.666667	1	0	1	0	0.333333	1	0.333333	0	0	1	0	0	1	1	1	0	0	1	0	0.333333	0	1	0	1	0.333333	0	1	0	1	0	0	0.333333	0.666667
382	0	1	0.333333	0	0.666667	0	0.333333	0	0	0	0	0	1	1	0	0	0.666667	1	0.333333	0	0	0	0	1	0.333333	0.666667	1	0	0.333333	1	1	1	0	0.333333	0.333333	0.333333	0.333333	0	0	0.666667	1	1	0	1	0.333333	0.333333	0.666667	0	0.333333
383	0.333333	1	0	0.666667	0	0	0	0.666667	1	0.333333	0	1	1	1	1	0.666667	0	0	0	0.666667	1	0.333333	0.333333	1	0	0	0	0	0	1	0	0	1	0	1	0	1	0.666667	1	0	0.333333	1	0.333333	0.666667	0	1	1	0.333333	0.333333
384	0	1	1	0.333333	0.333333	0	0	0.666667	0	0.333333	0	1	0	0	0	1	1	1	0.333333	0.333333	1	0	0.666667	0	0	0.666667	1	0	0	0	0	0.666667	0	0	0	0	0	1	0	0.333333	0	0	0	0.666667	0	1	1	0	0
385	0.333333	1	0.333333	0.333333	0	0.333333	0	0.666667	0.333333	0	1	1	0	0	1	1	0.666667	1	0	0	0	0	0	1	0.333333	1	1	1	0.666667	0	0.333333	0.666667	0	0	0.666667	0	1	0.666667	0	1	0.666667	1	0.333333	0	0	0	0.666667	0	1
386	0	1	1	0.333333	0	0	0	0	0	0.333333	1	1	0	0	0.666667	1	0.333333	0.333333	0	1	1	1	1	1	0.666667	0	0	1	0.666667	0	0	1	0	0.333333	0	0	0	1	1	1	1	1	1	0.666667	1	1	1	0	0
387	0.666667	0	0	0.333333	0.666667	1	0	0.666667	0	0	0.666667	1	1	1	0	0	0	0.666667	0	0.666667	1	0.666667	0.666667	1	0	0.333333	0.666667	0	1	0.666667	0.333333	1	1	1	0	0.666667	0	0	1	0.333333	0	0	0.333333	1	0	1	0.666667	1	0
388	0	0.666667	0	1	1	0	0	0.333333	0	1	1	0.666667	0	0.666667	0	0.333333	0.333333	0.666667	0.333333	0	0	0.666667	1	1	0	0	0	0.333333	0.666667	0.333333	1	0.666667	1	0	0	0	0	1	0.333333	0.666667	0.333333	1	0.333333	0.666667	1	0.333333	0	1	1
389	0	0	0	0	1	0	0.333333	0	0.333333	0	1	0	0.666667	1	0	1	0.333333	1	0.333333	0.333333	0	0	0	0.666667	0.666667	0.333333	0	0	0	0	0.333333	0	0	1	0	0.666667	1	1	1	1	0	1	0.333333	1	1	0	0.666667	1	0.333333
390	0	0.333333	1	0.333333	0.666667	0	1	0.666667	1	1	0.666667	1	1	0.666667	1	1	1	1	0.333333	1	0	0	0.333333	0	1	1	1	0	0.666667	0	0	0	0	0.333333	0	1	0	1	1	0	1	1	0.333333	1	1	0.333333	0	0.333333	0
391	0	1	0	0	0	0	0.333333	1	0	0.666667	0	0	0	1	0	1	1	0	1	1	0	0	0.666667	0	1	0.666667	1	0.333333	1	0	0.333333	0.333333	0	0.333333	0.666667	0	0.333333	0.333333	0	0	0	1	1	1	0	0.333333	0	1	0.333333
392	0.333333	0.666667	1	0.666667	0.333333	1	0.333333	0.666667	0	0.333333	0	0	0	1	0	0.333333	0	0	0	0	0	1	1	0	0	0.666667	0	0	1	0	1	1	0	0	0.333333	0.333333	1	0	0.333333	0.333333	0	0	1	0	0	0	1	1	0
393	0.333333	1	0	1	0	1	1	0	1	0	0	1	1	0.666667	1	1	1	0	0.333333	0	1	0.333333	0	0	0	0	0	0.333333	0	0	0	0	0	0	1	0	0	1	1	0	0.333333	1	0.333333	0	0	0	0	0.666667	1
394	0.333333	1	1	0	1	0	0.333333	0	0	0	1	0	1	0	1	0.333333	0	0	0	0.666667	1	1	1	0	0	0	1	0.333333	0	0	0	0	1	1	0	1	1	1	0	0.333333	1	0.333333	1	1	0	1	0.666667	0	0
395	0.666667	0	0	0.333333	0	1	0.333333	0	0	0	0	0	0.666667	1	1	0	0.333333	1	1	0	1	0.333333	0	0	0.333333	0	0	1	1	0	0.333333	0	0	0	0	1	0.333333	0	0	1	1	0	1	1	0	0	1	1	0
396	1	1	0	0.666667	0	0	0.333333	0.333333	0	0.333333	0.333333	0	1	1	0.333333	1	1	0	1	0	0	1	0.333333	0	0	1	0	1	0	0	0	1	0	0	1	0.333333	1	1	0.333333	1	0.333333	0.333333	1	0	0	0.333333	0	0	1
397	0.333333	0	0	1	0	1	1	0	0	0	1	0.333333	0.333333	0	0.333333	0.333333	0.333333	1	1	0	0	0	0.666667	0.666667	0.666667	1	1	1	0.333333	0	0	0	0	0	1	0	0.333333	0	0.333333	0	0.333333	1	1	1	0.666667	0	0	0.666667	1
398	0.666667	1	0	0	0.666667	0	0.666667	0	0.333333	0	0	1	0	0.666667	0	0.333333	0	0	0	0	0.333333	0.666667	0	0.333333	1	0	0.333333	0	0.333333	0.333333	0	1	1	0	1	0	1	1	0	1	0	0	0	0	0	0	1	0	0.333333
399	0	0	0.333333	0.333333	0	0	1	0	0.333333	0	0	0.666667	0.666667	0	0	0.666667	0	0.333333	0.666667	0.333333	1	0	0.333333	1	0	0.333333	0.333333	1	1	0.666667	1	1	1	1	1	1	1	0	1	1	0.333333	0	0	0	0.333333	0	0	0.333333	0.333333
400	0.666667	1	1	1	1	0	0	0	0.333333	0	0.333333	1	1	0	0.333333	1	1	0	0	1	0	0	0	0.333333	1	1	0	0.333333	0	0	0	1	0.666667	1	1	0.333333	1	0	1	1	0	0.333333	0	0	0.333333	0.666667	0	0	0
401	1	0	0.333333	0	0	0.333333	0	1	0	0.666667	0	0.333333	0	0.333333	0	0	1	0	0	0.666667	1	1	1	0	0.666667	0	0	0.333333	1	0.333333	0	1	0	0	1	0.333333	1	0	0.333333	0	0	0.333333	0.333333	0	0.333333	0.666667	0	1	1
402	1	1	0.666667	0	0	0	0	1	0.333333	0.333333	0	0.333333	1	1	0	0	1	0.333333	0.666667	1	0	0	0	0	0	1	0	0	1	0.333333	1	0	0.333333	1	0	0	0.666667	0	0.333333	0.666667	0	1	1	0	0	0	0.666667	1	0.666667
403	0	0.333333	0.333333	1	1	0	0.666667	1	0	0.666667	0	0	0.333333	0.666667	0.333333	0	1	0	0.666667	0	1	0.333333	0.333333	0.333333	0	0	0.333333	0	0	0	1	0	0	0	0.333333	0	0	1	0	0	0	0	1	1	0.333333	0	1	0	1
404	0.333333	0	1	1	0	0.333333	0	1	1	1	0	0	0.333333	0	0.333333	0	0	0	0.666667	0	0	1	0	0.666667	1	1	0.333333	0.666667	0	0	0	1	0	0.333333	1	1	0	1	1	0.666667	1	1	0.666667	0	1	0	1	1	1
405	0.333333	1	0.333333	0.666667	1	0	1	0	0	0	0	1	0	1	0	1	1	0.333333	0	0	0	0	0	1	0	1	0	0.333333	1	0.333333	0.333333	0.333333	0	0.333333	1	1	1	0	0	0	0	0.333333	0.666667	0	1	1	0	0.333333	0
406	0.666667	0.666667	1	0	1	1	1	1	1	0	1	0.333333	0.666667	0	0	1	1	0	0	0	0.333333	0.333333	1	0	0.666667	0	0.666667	0	1	1	1	0	0	1	1	0	0	0	0	1	1	0	0	1	0.333333	0.666667	0	0	1
407	1	0	0	1	1	1	1	1	0.333333	0	1	0	1	1	0	0.666667	1	1	1	0	0.333333	0.666667	0.666667	0	0	1	0.333333	0.666667	1	0	0	0.666667	1	1	0.666667	1	0.666667	0	1	0.333333	1	0	1	0.666667	1	0.333333	1	0.333333	1
408	0	1	1	1	0	1	1	1	0	1	0	1	0.666667	1	0.333333	0	0.666667	0	0	1	0	0.666667	1	0	0	0	1	1	0	1	0	1	0	0	0	0	1	0	0	0	1	0	0	0.333333	1	1	0	0	0.666667
409	0.666667	0	0.666667	0	0.333333	1	0.666667	0	0	1	0	0.333333	0	0	0.333333	0.333333	1	1	0.666667	1	1	0	1	1	0	1	0	0	0.333333	0.666667	1	0	1	0.333333	1	0	0.666667	1	1	0	1	0.333333	0.333333	0.333333	0.333333	0	0	1	1
410	1	0	1	0	1	0.333333	0.333333	0	0.333333	0	1	0.333333	0	0.333333	0	0.666667	1	1	0.666667	1	1	0.666667	0	0	1	0	0.666667	1	1	0.666667	0	0.666667	0	0	0	0	1	0	0	0.333333	0	0	1	0	1	0.666667	0.333333	0.333333	0
411	1	0.333333	0.666667	1	0	0	0.666667	1	0	0	0	0.333333	0	1	0	1	0.333333	1	0.666667	0.666667	1	0.666667	1	0.333333	0	1	0	0.333333	0	0	1	1	1	0	1	0.333333	0	0.666667	1	1	1	0.333333	0	0	0	0.333333	0	0.333333	0.333333
412	0.333333	1	0	0	1	0	0	1	0	0	1	0.333333	0.333333	1	0	1	1	1	0	1	0.333333	0.666667	1	0	0.666667	0	0	0.666667	0	0.333333	0	0	0.666667	0	0.666667	1	0.666667	0	0	0	1	1	0.666667	0	0	0.333333	1	0.333333	0.333333
413	0.333333	1	1	0	0.666667	0.666667	1	0	0	0.666667	1	0	0	0	0	1	0	0	0	1	1	1	1	0.333333	0	1	1	1	1	0	0.333333	1	0.333333	1	1	0.333333	0.666667	0.333333	0	0	0	0	0.333333	1	1	1	1	0	0.333333
414	0	1	1	1	0	1	0	1	0.333333	0	0	0	0	0	0	0	0.666667	0	1	1	0	0	0.333333	1	1	1	1	1	0	0	0	1	0.333333	0	1	1	1	1	0.333333	1	1	1	1	1	0.333333	1	0	1	0.666667
415	0.333333	0	0	0.333333	0.666667	0	1	0	0.333333	0	0	0.333333	1	1	0.333333	0	0.333333	0	0.333333	1	0.333333	0.333333	1	0	0	0	0	0	0	0	0.333333	1	0.333333	0.333333	0	1	1	0	0.333333	0.666667	0	0	0	0	1	0	1	0.333333	0
416	0	1	1	1	0.333333	0	1	1	0	0.666667	1	1	0	1	0.333333	0.333333	1	0.333333	0.333333	0.333333	1	0.666667	0	0.333333	0	1	0	0.333333	0	1	0	1	0.333333	0	0	0	0	1	1	1	1	0.333333	0	0	0	1	0	1	0
417	1	0	1	0	1	0	0.666667	0	1	1	1	0	0	1	1	0.666667	0	0.666667	1	1	1	0.666667	1	0	0.333333	1	0	0.333333	0.666667	0.666667	0.666667	0	1	1	1	0	1	0	0	0	0	0	1	0	0	0	1	1	1
418	0	0	0.333333	0	0	0.333333	1	1	0	0	1	0	0.333333	0.666667	1	0	0.666667	0.666667	0.333333	0	0	0.666667	0.333333	0.666667	1	0.666667	0	1	1	0	0	0.666667	0	0.666667	0	0	0	1	0.666667	0.666667	1	0.666667	0	0	0	0	0	0.333333	0.333333
419	1	0	0	0	0.666667	0	0	1	0	1	0	0	1	1	1	1	1	1	1	1	0	1	1	0.333333	0.333333	1	0.333333	0.333333	1	0.333333	0.333333	0.666667	0	1	1	0.666667	0	0.666667	0	0.333333	0	0	0	1	0	1	0	1	1
420	1	1	1	0	1	1	0.666667	0	0.333333	0	1	0.333333	0	0	0	0	0	0.333333	0.333333	0	0.333333	0	0.333333	0.333333	0	0	1	1	0	1	0.333333	0	1	1	1	0	1	1	1	0	0.333333	0.333333	0	0	0	1	1	1	1
421	1	0.333333	0	0	0.666667	0	0	0	0	1	0	1	0	0	0	0	1	0	1	0	1	1	0.333333	0.333333	0.333333	0	1	0.333333	0	1	0	0.666667	0	0.666667	1	0	1	0	0	0	0.666667	0.666667	0	0	0.666667	1	1	1	0
422	0	0.333333	0	0.333333	1	1	0	0	0	0	0	0	1	0.333333	0.333333	0	0	1	1	1	1	0	0	1	1	0.333333	0	0.333333	0	0	0	1	1	0.333333	0.666667	0.666667	0	0.333333	1	0	0.666667	0	0	0.666667	0	0	1	0	1
423	0	0.333333	0	0	0.333333	0.666667	0	0	0	0.333333	1	1	0	1	1	1	0	1	0	0	0	1	0	1	0	0.333333	0	1	0	0.666667	1	0	0	0	0.333333	0	0.333333	0.333333	1	1	1	1	0.666667	1	0	1	0	0.333333	0
424	1	0	0	0	0	0.333333	1	0	0.333333	0.666667	0	1	0	0.333333	0	0	0.333333	0	1	0	0	0	0.333333	1	0	0	0	1	1	0.666667	1	0	0.666667	0	0.333333	0	0	0.666667	0	0	0	0.666667	0	0	1	0	0.333333	0.666667	0
425	1	0.666667	0	0	1	1	0	0	1	0.333333	1	0.666667	0	0	0	1	0.333333	0.333333	0.333333	0.333333	1	0.333333	0	1	0	1	0	0	0	1	0.333333	0	0	1	1	0.333333	0.333333	1	0	0.666667	0	0	0.333333	0	1	0	0	1	0
426	1	0	0	1	0	0	1	0.333333	0.333333	1	0	0	1	1	0.333333	0.333333	0	0.666667	1	0	0	0	0.333333	0	0.333333	0.666667	0	0	0.333333	1	1	0	0	0	0	0.666667	0.333333	0.333333	0.666667	0	0.333333	1	0	0.333333	0	0	0	0	0.333333
427	0.333333	0.333333	0.666667	0	0	0.666667	0	0.333333	0	0	1	0	1	0	0	0	0.333333	0	0	0	1	1	0.333333	1	0	0.333333	0.333333	0	0.333333	0	0.333333	0.333333	0	0.666667	1	0	1	0	1	0	0.333333	0.666667	0	1	0	0.333333	1	0.666667	1
428	1	0	0	0	0	1	0	1	0	1	0	0	0	1	1	0.666667	0	1	1	1	0	0.666667	0	1	1	1	1	0.333333	0.666667	0.666667	1	0	0.666667	0	0.666667	1	1	0.666667	0	1	0.666667	1	0	0.666667	0	0.666667	1	1	1
429	1	0	0.333333	1	1	1	1	0	0	0	0	1	1	0	0.333333	0.333333	1	0	0.666667	0	0	1	0	0	0	0	0.666667	0.666667	0	1	0	0	0	1	1	0	0	0.333333	0	0	0	0.333333	0	0.333333	0.333333	1	0.333333	0.333333	0
430	0.666667	0	0.333333	1	1	1	0	1	0.333333	0	0	1	1	1	0	0	1	1	0	1	0	0.666667	0.333333	0.333333	0.333333	0	0	0.333333	1	0.333333	0	0	0.666667	0	0	0	0.333333	1	0.333333	1	1	0	0.666667	0	1	1	0.333333	0	0
431	0	0.666667	0	0	0	1	1	1	0.333333	0	0	1	0.333333	1	1	0.333333	0.333333	0.333333	0.333333	1	0.333333	0.666667	1	0	0.333333	0.333333	0.333333	0.333333	1	0.333333	0.333333	1	0.333333	0.666667	0	1	1	0	0.333333	0.333333	0	0	0.666667	1	0.666667	0.666667	1	1	1
432	1	1	1	0	1	1	0	1	0.333333	0.333333	1	1	0	1	0.333333	0.333333	1	0.333333	0.333333	0	1	0	1	1	0.333333	1	0	0.333333	1	0.333333	0.333333	1	0.333333	0	0	0	1	0	0	0.666667	0	1	1	0	0	0	0	0	0
433	1	0	1	0	1	0.666667	1	1	1	0	1	0.333333	1	1	0.333333	0.333333	0	0	1	0	0.333333	0	1	0.333333	0.333333	1	0	0.333333	0	0	0	0	0.333333	0.333333	1	1	0	1	0	0	1	1	1	0.666667	0	0	1	0	0.333333
434	0.333333	1	0	0	1	0.333333	0.333333	1	0.333333	0.666667	0	0	0.333333	1	0.333333	0.333333	1	0.333333	0.333333	1	0.333333	0.333333	1	0.333333	0.666667	1	0	0.666667	0.666667	0.333333	0	1	0	1	1	0	0.333333	0.333333	0.666667	1	1	0	1	1	0.333333	0.333333	1	0.333333	0.333333
435	0	1	0.333333	0	0	0.666667	0	0	0.333333	0.333333	1	1	1	0	0.666667	1	0	1	0.666667	1	0.666667	0.333333	1	0	1	0	0	1	1	0.333333	1	1	0.333333	0.666667	0	0.333333	0.333333	1	0.333333	0.333333	1	0.333333	0.333333	0.666667	0.333333	0.333333	1	0.333333	0.333333
436	0	0	0.666667	0	0	0.666667	0	1	0.333333	0.333333	1	0.333333	0.333333	1	0.333333	0	1	0.333333	0.333333	1	0.333333	0.333333	1	0.333333	0.333333	0.666667	1	1	0.333333	0	0	0	0.333333	0.333333	0.333333	0	0.666667	1	0.666667	1	1	0.333333	0.333333	0	0	0.666667	1	1	0.666667
437	0.666667	1	0.333333	0.666667	1	0.333333	0.666667	1	0.666667	0	1	0.333333	0.333333	1	0.333333	0.333333	1	0	0.666667	0	0.666667	0	0	1	1	1	0.333333	0	0.333333	0.333333	0.333333	1	0.333333	0.333333	0.333333	0.666667	0.333333	0	0.333333	0.333333	1	0	0.333333	0	0.333333	0	0.666667	0	0
438	0.333333	1	0.333333	0	1	0.333333	0.333333	1	1	1	1	1	1	1	0.333333	0.333333	1	0	0	0	0.333333	0.333333	1	0.333333	0.666667	1	0	0.666667	1	0.666667	0.666667	1	0	0	0	0	0	0.666667	0.666667	0.666667	1	1	0.666667	0	1	0.666667	0	0.666667	0
439	0.333333	0.666667	0.333333	0.333333	1	0.333333	0.333333	1	1	0.333333	0.333333	1	1	1	0.333333	0.333333	1	0.333333	0.333333	1	0.333333	0.666667	1	1	0	1	0.666667	0.666667	1	0.333333	0.666667	1	0	0.333333	1	0.333333	0.333333	0	1	1	1	0.333333	0.333333	1	0	0	1	0.333333	0.333333
440	0.333333	0	0	0.333333	1	0.333333	0.333333	1	1	0	1	0.333333	1	0	0.666667	1	0	0	0.666667	1	0	0	0	0.333333	0	1	0	0.333333	1	1	0	1	0	0	0.333333	0.666667	0.666667	0	0.666667	0.666667	1	0.333333	0.333333	0	1	0	1	0	0.666667
441	0	0	1	0	1	1	0	1	1	1	1	0.333333	0	1	0	0	1	0.333333	1	0	0.333333	1	0.666667	0	1	0.333333	0	0.666667	0	0	0.666667	1	0.333333	0.333333	1	0.333333	0.333333	0	0	0	1	0	0.666667	1	0	0.666667	1	0.333333	1
442	0	0.666667	1	0.666667	0	0.333333	0	1	0.333333	0.333333	1	0.666667	0.333333	1	0.333333	0.666667	1	0	0	0	0	1	0	0	0.666667	0	1	1	0	1	1	0	0.666667	0	0	0.333333	0.666667	0	1	1	0	0.666667	0.666667	0	1	1	1	1	1
443	0.666667	0	1	0	0.666667	0	0	0.666667	1	0.666667	0	0	0.666667	1	0	0.666667	0	0.333333	0.666667	0	0	0.666667	0	1	1	0.666667	0	0	0	0.333333	0.666667	0	0.333333	0	0.666667	0.666667	0	0.666667	0	0.666667	0	0.333333	0	0.666667	0.666667	0.666667	1	0	0.666667
444	0	0	0	1	0	0.333333	0	0	0	1	0	1	1	1	0	1	0	0.333333	0	1	0.333333	0	1	0	1	0	1	1	0	0	0	0	0.333333	0	0	0	0.666667	1	0	1	1	0	0.666667	0	0	0.666667	0	0.333333	0
445	0	0	0	0	0	0	0.666667	0	0	1	1	0	0	0.666667	1	0	0.666667	0	0.666667	0	1	1	0	0.333333	0	0	0.333333	0	1	0	0	1	0.333333	0.666667	0	0.666667	1	0	0.666667	0	0.666667	0	0.666667	1	0.666667	1	1	0	0
446	0.666667	0	0.333333	0	0.666667	0	0.333333	1	0	0.666667	1	0	0	1	0.333333	0.666667	1	0	0.666667	0	0.333333	0.666667	0	0.333333	0	0	0	0	0	0	1	0	0.333333	1	0	0	0.333333	1	0.666667	1	0	0	0.333333	1	0	0	0.333333	0	0
447	1	0	0.333333	0.333333	1	0.333333	0	1	0.333333	0	1	0.333333	0.666667	0.666667	0	0.333333	1	0.666667	1	0	0.666667	0	0	0.333333	0	1	0	1	0	0.333333	0.666667	0	0	0.333333	1	0	0	0	0.333333	1	1	0	0.333333	1	0.333333	0	0	0	1
448	1	0	0	1	0	0	0	1	0.333333	0.333333	0.666667	0	0	0	0	0.666667	1	1	0.666667	1	0	1	0.666667	0	1	0	0	0	1	0.333333	1	0	1	1	0	0.333333	0.666667	0	1	1	0	0	0	0.333333	0	0	1	0	1
449	1	0.333333	0	0	0.666667	0	0	1	1	0.666667	1	1	1	0	0.333333	1	0	0.333333	0	0	1	1	0.333333	1	0.666667	0	0.333333	0	0.333333	0	0	0.333333	0.333333	1	0	0	0	0	0.333333	0	0	1	0.666667	0.666667	1	1	1	0.333333	0
450	0.666667	1	0	0.333333	1	1	1	0.333333	0.666667	0	0.333333	0.333333	0	1	1	1	0	0	1	0	0	0	0.666667	0.666667	0	0.333333	1	1	0	0	0.666667	0	0.666667	0	0.333333	0.333333	0.666667	1	0	0	1	0	0	1	0	0.666667	1	0	1
451	0	0.666667	1	0.666667	1	0	0	0	1	0	1	0	0	0	1	0	1	1	0.666667	1	0	0.333333	1	0.333333	0.333333	0	0	0.666667	1	1	1	1	0	0.666667	1	1	0	1	1	0	1	0	0.666667	1	0.333333	0.333333	1	0.333333	0.666667
452	0.333333	0.333333	0.666667	1	0	0	0	1	0	1	0	0.333333	0.333333	1	1	1	1	0	0.333333	0.333333	0.666667	0.666667	0	0.333333	0	1	0	1	1	0	1	1	1	0.666667	0	1	0	0.666667	0	0.666667	1	0.333333	1	1	0	1	0.666667	0	0
453	0	0	0	0	0	1	0	1	1	0	1	1	0.333333	1	0.333333	1	0	1	0	0.666667	0	0.666667	0	0.666667	0.666667	1	1	1	0	1	1	0.666667	1	0	1	0.666667	1	1	1	1	1	1	0	1	0	0	1	1	0
454	0	0	0	0	0	1	0	1	0.666667	1	1	0.333333	0	1	0.333333	1	1	0	0	1	0.666667	0	1	0	0	1	0.666667	0	1	1	0	1	0.333333	0.333333	0	0	1	0	0	0.666667	1	1	1	1	0	0.666667	1	0.333333	0
455	1	0	0.666667	0.666667	1	0	0	0	0.333333	0.333333	1	0.666667	0.666667	0	0.333333	1	1	0	0	0.666667	0	0	1	0.333333	0.333333	1	0.333333	1	0.333333	1	0	1	0	0.333333	1	1	0	1	0	1	0	0.333333	0.666667	0	0.333333	1	1	0	0
456	1	0	1	0.666667	0	0	0	0.333333	0.333333	0.666667	1	1	0	0.333333	0	1	0	0	0.666667	1	1	0.666667	1	0	0	0.333333	0.666667	0.666667	1	1	0	1	1	1	1	0	0	1	0	1	0	0	0	1	0	0	0.333333	0.333333	0
457	0	1	0.333333	0	0	0.333333	0	0	0.666667	1	1	1	1	0.666667	0	0	0	0.333333	0	0	0	0	1	1	1	0.333333	0	0	0	0.666667	0.333333	0	0.666667	0	1	0.333333	0	0	0.333333	1	0	0	0.666667	0	0	1	0	0	0
458	0	1	0.333333	0	0	0	1	0	0.333333	0	0.666667	0.333333	0	0	1	1	0	0	0	0	0.333333	1	0.333333	0.333333	0.666667	0	0	0	1	0	1	0	0.333333	0	0.333333	1	0.666667	1	0	0	0	0.333333	0.666667	0	0.333333	0	0.333333	1	1
459	0.333333	1	0.333333	0	0.333333	0	0	1	1	1	0	0	0	0.666667	1	0.666667	0	0.666667	1	1	0	0.666667	0	0	0.333333	1	0	1	0.333333	0.666667	1	0.666667	0	0	0	1	0.333333	0.333333	0.666667	1	0	0	1	1	0.333333	0.333333	0	0	0.666667
460	0.666667	0	0.666667	1	0	0.333333	1	0	0.333333	0.333333	0.333333	1	1	0.666667	1	1	1	0	1	0	1	1	1	0.333333	0.666667	0	0.333333	1	1	0.666667	0	0.333333	0	0	0	0.333333	0.333333	0	0	1	0	1	1	1	1	0	0	1	1
461	1	0	0	0	0	0	0	1	0.333333	0.333333	0	1	0	0	1	1	1	0	0	1	0	0	0.333333	1	1	1	0.666667	0	1	0	0.666667	0.666667	0	0.333333	0	0.333333	0.666667	0	0.333333	1	1	0.333333	0.666667	1	0	0	1	1	1
462	0.666667	1	0.666667	1	0.666667	1	0	1	1	0	1	0	0.333333	0.333333	1	0	0	0.333333	0.333333	0.333333	0.666667	1	0.333333	1	0	0	0.333333	0	0	0.333333	1	0	1	0	0	0.333333	0.666667	0	0	0.666667	1	0	0.333333	0	1	0	0	0.666667	0
463	0.333333	1	0	0.333333	1	0.333333	1	1	0	1	1	0	0	1	0	0.666667	1	1	0.333333	0.333333	1	0	1	0	0.333333	0.333333	0	1	1	1	1	0.666667	1	0	1	1	1	0.333333	0.333333	0	1	0.333333	1	1	0	0.333333	0.333333	0	0.666667
464	0.333333	0.666667	0	0.333333	1	0.666667	1	1	0	0.666667	0	0	0.333333	0.333333	0.666667	0.333333	1	0.333333	0	1	1	1	0.333333	1	1	0.333333	0.333333	0.333333	0.333333	1	0	1	0	1	0.666667	0	0	1	0	0.333333	0.333333	1	0	1	0	0	0	0.666667	0.666667
465	0.666667	0	0.333333	1	1	0.333333	0	0	0.333333	0.333333	0	0.333333	0.333333	0	0	0	0	1	0	0	0	1	0	0	1	0.333333	0	0	0	0	1	0	1	0.333333	1	0	1	0	0	0.666667	0	0.333333	1	0	0.333333	0.333333	0	0.666667	0
466	0	0	0	0.333333	1	0.333333	0.333333	0	0.333333	0.666667	0	1	0.333333	1	0	0.666667	1	1	0.666667	1	0.333333	0.666667	1	0.333333	0	1	0.333333	0.333333	0	0.333333	1	0	0.333333	1	1	0	0	0.666667	0.333333	0	0.333333	1	0	1	0.666667	0	0	1	0
467	1	1	0.333333	0.666667	0	0.666667	0.666667	0	0.333333	1	0	1	1	0	0.333333	0.666667	0	0.333333	0	1	0	0.666667	0	1	1	1	0	0.333333	0	0	0	0	0.333333	0	0	0.333333	0.333333	0.333333	0.666667	0	1	0	0	0.333333	0.333333	1	0	0.333333	0
468	0.333333	0.666667	0.666667	0.666667	0	0.333333	0	0	0	0	0.333333	0.666667	0	0.333333	1	1	1	0	0	0	0	0.666667	1	0	0	0.333333	0	0.333333	1	0.333333	0	0.333333	0.333333	0	0	0	0	0.333333	1	0.666667	1	1	0	1	0	0	0	0	1
469	0	1	0.333333	0.666667	1	0.333333	0.333333	0	0.333333	0.333333	0	1	0	1	0.333333	0	0.666667	1	1	0	0.666667	1	0.666667	0	1	0	0.333333	0	0	0.666667	1	0	0.666667	0	1	1	1	0	0	0	1	0.333333	0.666667	0	0	0.333333	1	0.333333	0
470	0	0	0.333333	0.333333	0.666667	1	0.666667	0	0.333333	0	0.333333	0.333333	1	1	0.666667	1	0	1	0	1	1	0	0.666667	0	0.333333	1	0	0	1	0	0	0	0.333333	0.333333	1	0.666667	1	0	0.333333	0	0.333333	1	0	1	0.333333	0.666667	0	0	0.666667
471	0	0.333333	0	0	0	0.666667	1	0	0.333333	0.333333	1	0	0.666667	0	0	1	0	1	1	1	0	0	0	0	0	0.666667	0	0.333333	0	0.333333	0.333333	1	0.333333	0.666667	1	0	0	0	1	1	0	0.333333	0	1	0	0	0	0.333333	0.333333
472	1	0	0	0	1	0	0.333333	1	1	0.666667	0	0	0	0	0.666667	0.666667	1	0	0.666667	1	0.333333	0.666667	0	0	1	0	0.666667	1	0	0	1	1	0.333333	0	0	0	0.333333	1	1	1	0.666667	1	1	1	1	0.333333	1	0.333333	0
473	0	1	1	0	1	0.333333	0	0.333333	0	0	0.333333	0.333333	0.666667	1	0	0	0.333333	0	0	0	1	1	1	0.333333	0.333333	0	1	0	1	0.333333	0	0	0.333333	0.333333	1	0	1	0.333333	0.333333	0.666667	1	0	0	0.333333	1	1	0	0	1
474	1	0	1	1	0.333333	0	0	1	0	0	0.333333	0	0	1	0	1	0	0.333333	0.333333	0	0	0	1	0.333333	0	1	0.333333	0.333333	0	0.333333	1	1	0	0	0	0.666667	1	0.333333	0	1	0.333333	1	0	0.666667	0	0	0	0.666667	0
475	0	1	0.333333	0	1	0.333333	0.333333	0	0.333333	0	0	0.333333	1	1	0.333333	0	0.666667	0	0	0	0	1	0.666667	0.666667	0.666667	1	0.333333	0.666667	0	0	0.666667	1	0.333333	1	0	0.333333	1	1	0.333333	0.333333	0.666667	1	0.333333	0.333333	0.333333	0.333333	1	1	0
476	0	0	0	1	0	0.666667	1	0.333333	0	1	0	1	0.333333	1	0.333333	0	1	0	1	0	0	0	0	0.333333	0	1	1	0	1	0	1	0	0.666667	0.666667	0	0.333333	0.333333	1	0.666667	0	0.333333	0	0.666667	0	0.333333	0	0	0	0
477	1	0.333333	0.333333	0.333333	1	0.333333	0.333333	0	0.333333	0.333333	0	0.333333	0.666667	0	1	0.333333	1	0	0	1	0	0	0.333333	0	1	0	0.333333	0.333333	1	1	0.666667	1	0	1	0	0	0.666667	0.666667	0	0	0	0.333333	0	0	0	0	0	1	0
478	0	0.333333	0.333333	0.333333	1	0	0	1	0.333333	0	1	0	0.333333	0	1	1	1	0.333333	0	1	0	0.666667	0	0.666667	1	1	1	0	0.666667	0	0	0	0.333333	0.666667	0	1	1	0	0.333333	0	1	1	1	1	0	1	1	0.333333	0
479	0	0.333333	1	0	1	0	0.333333	1	1	0	0	1	0.333333	1	0	1	1	1	1	0	0.666667	0	1	1	1	1	0.333333	0.666667	1	1	0	1	0	0.666667	1	1	1	0	1	0.333333	0.666667	0.666667	0	0	1	0	1	1	0
480	0	0	0	0	1	0	0	0	0	0	0	1	0.333333	0	1	0	1	0	1	1	0	0	0	0.333333	0	1	0	0	1	0.666667	0	1	0	0	0.333333	0.666667	0.666667	0	1	1	1	1	0	0	0	0	1	0.666667	0.666667
481	1	0.333333	1	0	1	0	0	0	0.666667	0	0.333333	1	1	0	0	0.666667	0	0	0	1	0	1	0	1	0	1	0	1	1	0.333333	0	1	0	0	0	0	1	0	0	1	0.333333	0.333333	0	0.333333	0.333333	1	0.333333	0	0
482	1	0	0.333333	1	0.333333	0.666667	0	0	1	0	0	0.666667	0	0	1	0	0	1	1	0.666667	1	0	0	1	0.333333	1	0	0.333333	0	0	1	0	0	1	0	1	1	0	0	0	1	0	0	1	0	1	1	0	1
483	1	1	0	0	0	0	1	0.333333	0.333333	0.666667	1	1	0	1	0.333333	0	0	0	0	1	0.333333	0.333333	0	0	0.666667	1	0.333333	0	1	1	1	1	0	1	0	0.333333	0	1	1	0	1	1	1	1	0.666667	0.666667	1	0.333333	0
484	0	0	1	0	1	0	0	0.333333	0.333333	0	0	0.333333	0	1	0	0	1	0	0	0	0	1	0.666667	1	1	1	0.333333	0	0.333333	0	0	0.333333	0.333333	0.666667	0	0	1	0	1	1	0	1	1	0	0.666667	1	0.666667	0	0
485	0	0	0	0	0	0.666667	0.666667	0	0	0.666667	0	1	0.333333	0.333333	0.666667	0.666667	0	0.666667	0	1	1	0.333333	1	0.333333	1	1	0	0	1	0.333333	0	0.333333	1	0	0.666667	0	0	0.333333	0	0.333333	0.666667	0.666667	0	0.333333	0.333333	0.666667	0.333333	0.333333	0
486	0.333333	1	0.333333	0	0	0.333333	0	0.666667	0.666667	0.666667	0	0.333333	0	0.333333	1	1	1	0	1	0	0.333333	0.333333	0	0	0	0.333333	1	0	1	0.333333	0.333333	1	0	1	0	0.666667	0	0	1	1	0	0	0.333333	0	0	0	0	1	1
487	0	1	0.333333	0	0	0	0	1	0.333333	0.666667	0	0	0	0	0.333333	1	0	0	0.333333	1	0	0	0.333333	0.333333	0	0	1	1	1	0	0	0	0	0	1	0.333333	0	1	1	1	0.333333	1	0	1	0	0	1	1	1
488	0.666667	0	1	0	1	0.333333	0	1	0	1	0	0.666667	1	0	0.333333	0	1	0	0	1	0.333333	1	1	1	0	1	1	1	1	1	0.666667	0	0	0	0	0	0.333333	1	0.666667	0	1	0.666667	0.666667	1	1	1	1	0	0
489	1	1	1	0	1	1	0.666667	0	0	0.666667	1	1	0.666667	1	0	0.333333	0	0.333333	0	1	0.333333	0	1	0.333333	0	1	1	1	1	0	1	0	0	1	0	0	0	0	0	1	0	1	1	1	0	0.333333	0	1	0
490	1	1	0.666667	1	1	0.333333	0	0	1	1	0	0.333333	0	0.333333	0	1	0.333333	1	0.666667	0	0	0	0.333333	0	0.333333	0	0.333333	0	0	0.333333	1	0	0.333333	0	0.333333	1	0.666667	0	1	1	0	0	1	0	0	0	0.666667	1	0
491	1	0	1	1	0	0	0	0.333333	0.333333	0	0	0.333333	0	0	1	0	0.333333	1	0	1	0.333333	1	1	0	0.333333	0.333333	0	0.333333	0.666667	0	0	0	0	0	0	0	0.333333	0	0	0	0	0	0.333333	0	0.333333	1	1	1	0
492	1	1	1	0	0	1	0.333333	0	0	0	0	0	0	0	0.333333	0	1	0	0.333333	0	0	0	0	0	0.666667	0	1	0	0	0	1	0.333333	1	0	0	0	0	0	1	1	0	1	0.666667	0	1	0	0	1	0.333333
493	0.333333	0	1	0	0	0	1	0	0.666667	0	0	0	1	0	1	0	0.333333	1	0.666667	0	0	0	0.333333	1	0.333333	0	0	1	1	1	0	1	0	0.333333	0.666667	1	0.333333	0.666667	1	0	0.666667	1	1	1	0	0	0	0.333333	0.333333
494	0	1	0.333333	0	0	1	0.333333	0	0	0.333333	0	0	0.333333	0	0	0	0.333333	0	0	0.333333	0	0	1	0	0.666667	1	0	0.333333	0	0	0.333333	0.666667	0	0.333333	0	0	0	0	0	0	0.333333	0	0	1	0	1	1	0	0.333333
495	0	0.333333	0	0.333333	1	0.333333	0.666667	0	1	0.666667	0	0	0.333333	0	1	0	0	0.666667	0	0	0.333333	0.333333	0	0	0.333333	1	0	0	0	0	0.333333	0	0	0	0.333333	1	0	1	0	0.333333	0	1	0	0	0.333333	0.666667	0	0	1
496	0	0	0.333333	0.333333	0.333333	1	0	1	1	1	1	1	0	0	0	0.333333	0	0	1	0	0.666667	0	0	0.333333	0	0	1	0.333333	0	1	1	1	0	0.333333	0	0.666667	0	0	0	0.333333	0	1	0	0.333333	0	0	1	0	0.333333
497	0.333333	0	1	1	1	0	0.333333	0.666667	1	0	0.333333	0	0.333333	0	0	0	0.333333	0	0.333333	0.666667	1	0.333333	0	0.333333	1	1	0	0	0	0	0	0.333333	1	0.333333	0	1	1	1	0	0	0	0	0.333333	0	0	0.333333	0.666667	1	0
498	0	0	0	0	0	0.333333	0.333333	1	0.666667	0	0.666667	0	0.333333	0	0	0	0	0.333333	0.333333	0	1	0.333333	1	0	0	0.333333	1	0.333333	0	0	0	1	0	0	0	0.333333	0	0	1	0	0.333333	1	0	1	0.333333	0	0	0	0.333333
499	0	0.333333	0	0	1	1	0.333333	0	1	1	0.666667	0	0	0.666667	1	0	0	1	0	0	0	1	0.333333	0.333333	0	1	1	0	1	1	0.333333	0.333333	0	0.666667	1	0	1	0.333333	1	0	1	0	0	0.666667	1	0	0.666667	1	0
500	0.333333	0.666667	1	0	0.666667	0	0	1	0.333333	0.333333	0.666667	1	0	1	1	0	0.666667	0	0	1	0	0.333333	0.333333	1	0	1	0	1	0.666667	1	0	1	0	1	0.333333	0.333333	0.666667	0.666667	0	0	0	0.333333	1	0	0	0.666667	0	0.666667	0
501	0.666667	1	0	0.333333	0	0	1	1	0	0	0	0	1	0	0.333333	1	1	0	1	0.666667	1	0.666667	1	1	1	1	1	0	1	0	0.666667	1	1	0	0	0	0.666667	0	0	0	0	0.666667	0	1	1	0.333333	0	0	0
502	0	0	1	0	1	1	0	0	0.666667	0	0.333333	0.333333	0	1	0	0.666667	0	1	0	0	0	0	0.666667	1	0	1	0	0.333333	1	0	1	0	0	0.666667	0.666667	1	0.333333	1	0	0	1	0	0	1	0	0	0	0	0.666667
503	0	1	0.666667	0	1	0	0.666667	1	0	0	0	0	0.666667	0	1	0	0	0.333333	0	0.666667	0	1	0.333333	0.666667	1	0	1	0	0	1	1	0.333333	1	0	1	1	0	0.333333	0	1	0	0	0	1	0.333333	0.666667	1	1	0.333333
504	0	0	0	0.333333	1	0	0.666667	1	0.666667	1	1	1	1	1	0	1	0	0	0.333333	0	0.333333	1	0.333333	0.666667	1	1	0	1	1	1	1	1	1	1	0.333333	0	0	0	1	1	0.666667	0	1	0.666667	0	0	0.666667	0	1
505	0	0.333333	0	0	0.666667	0	1	1	0	0.666667	1	0.666667	0	0	0.666667	0	0.666667	0	0.666667	0.666667	1	1	0	0	0	0	1	1	0.333333	0	1	1	1	0	0	0	1	1	0.666667	1	1	1	1	1	0.666667	0	1	0	0.666667
506	1	0.333333	0	1	0	1	0	0	1	0	0	0	0	0	0	0.333333	1	0	0	0	1	0	1	0.333333	1	0	0	0.666667	0.666667	0.666667	0.666667	0	0	0.666667	0	0.666667	0	1	0.666667	1	1	1	0	0.666667	1	0	0	0.333333	1
507	0	1	0	1	0	0.333333	0	0.333333	0.666667	0	1	1	0.666667	1	1	0.666667	0	1	1	0	1	0.333333	0.333333	0	0.333333	0	0.333333	1	0.333333	0.666667	1	1	1	1	1	0.666667	0	1	1	1	0.666667	1	1	1	0.333333	0	0	1	0
508	1	0	1	1	1	0	1	0	0	1	0	1	1	1	1	0.666667	0	1	1	1	0	0	1	1	1	0	1	0.666667	1	1	1	0	1	0.666667	1	0	1	0.666667	0	0	0	1	1	1	0	0	1	0.333333	0.666667
509	0	0	0	1	0.333333	1	1	0	0.333333	1	1	1	1	0.666667	0	1	0	1	0.333333	0	0.666667	1	1	1	1	0.666667	1	1	0	1	0.333333	0	0	0	0	0.333333	1	0	0	1	0	1	0	0.666667	1	1	0	1	1
510	1	1	0	1	1	0.666667	0.666667	1	1	1	0	1	1	0	0.666667	0	0.333333	1	0	0	1	0.666667	0	0.666667	0	1	0	0	1	0	1	0	0.333333	1	0.666667	1	1	0	0.333333	1	0.666667	0	1	0	1	1	1	1	1
511	1	1	1	0	1	0	1	1	1	1	0.666667	0.666667	0	1	0	0	1	1	0	0	0.333333	1	1	1	0	0	0.666667	0	1	0	1	1	1	0	0.333333	1	0	1	0	1	0	0.666667	0.666667	1	0	1	0.333333	1	0
512	0	0	0.666667	0	0	1	0.333333	1	1	1	1	1	1	0	1	1	0.333333	0.666667	0	0	1	0	1	0	0.333333	0	0	1	0	1	0	1	1	0.333333	1	0	1	0	0	0	1	0	0	0	0	0	0	0	0
513	1	0	1	1	1	0.333333	0	1	0	0	1	1	0.333333	1	0	0	0	0	1	1	0	1	0.333333	1	1	0	1	0	0	1	1	0	0	0	0	1	0.333333	0.666667	0	0	0.333333	0	0	1	0	0	1	0.666667	1
514	0	0	1	0.666667	1	0	0	0.333333	0	0.333333	1	0.333333	0.333333	0	0.333333	0.666667	1	1	0.666667	0	1	1	1	1	0.666667	1	0	0.666667	0	1	1	0.666667	0.666667	0	1	0.666667	0.666667	0.666667	1	1	0	0	0	0	0.333333	0.333333	0	0	0.333333
515	0	1	0.333333	0	0.333333	0.666667	0.333333	0	0	1	1	1	1	1	0	0.666667	1	0	0.333333	0.333333	0	0.333333	1	0.333333	1	1	0	0.333333	0.666667	1	0	0.333333	1	1	1	0	0	0.666667	0	0.333333	0.666667	1	0	0.333333	0.666667	1	1	1	0
516	0	1	1	1	0.666667	0.666667	0	0.333333	0	0	0	0	0.333333	1	0	0	0	0	0	0.333333	0.666667	0.666667	0	0.666667	1	0.666667	1	0.333333	0.333333	0.666667	0	0.333333	0.333333	0	0.333333	1	0.333333	0	0.666667	1	1	1	0.333333	0	0.333333	0.666667	1	1	0.333333
517	0	0	0.333333	1	1	1	0	0	1	0	0	0	0	0	0	0.666667	0.333333	0	0.666667	0	1	1	0	0	1	0	1	1	1	0	0.333333	1	1	0	0	1	0.333333	0	0	0	0.666667	1	1	0.666667	0	0.666667	1	0.666667	1
518	1	1	0.333333	1	0	0.333333	1	1	1	0.666667	1	1	1	1	1	1	1	0.333333	1	1	1	1	1	0.333333	0	1	0	0.666667	0.333333	0	0	1	1	1	0	0.666667	0	1	0.666667	1	1	1	0	1	1	0	1	0	1
519	0	0	0	0	0	0	1	0	0	0	0	0.666667	1	0.333333	1	0.333333	0	0	1	0.333333	0.666667	1	0	0.333333	0	0	0	1	0	1	0	1	1	1	1	0	1	1	1	1	0	1	0.666667	1	0.666667	1	0	0	0.333333
520	1	1	0	1	0.666667	0.666667	0.666667	0.666667	0.666667	1	0	0	0	0	0	0	0.666667	1	1	1	0.666667	0	1	0	0	0	0	0	0.666667	0	0	0	0	0.333333	0	0	0.666667	0	0	1	0	1	0.666667	1	0.666667	1	1	1	0.333333
521	0	0.666667	0	1	0	0	0.666667	1	0.666667	0	1	0	0	0.333333	0	1	0	1	1	1	0	1	0	1	0	0	0.333333	1	0.666667	1	1	0	0.333333	1	0.666667	0.666667	0.666667	1	0	1	0	0.333333	0.666667	1	1	1	0.333333	0.666667	0.333333
522	0.666667	1	0.666667	1	0	0.333333	1	1	1	1	0.333333	0.666667	0.666667	0.333333	0	1	1	1	0	0.333333	1	1	1	1	0	1	1	0.666667	1	0	0.666667	0	0	0.666667	1	0	0	0	0	1	0	0	1	0	0.666667	0	0	1	0
523	1	0	1	1	0.666667	0	0	0.666667	0	0	0	0	1	1	0.333333	1	1	1	0.333333	0	0	0	0	1	1	1	0	0	1	0	0	1	1	1	1	0	1	0	0.333333	0	1	0	1	0.333333	0	0	0	0.333333	1
524	0	0	0.333333	0	0	0	0	0.666667	0	0.333333	0	0.666667	1	0	0	0	1	0.333333	0.666667	0.333333	1	0	0.333333	0	0	1	0	1	1	1	0.333333	0.333333	1	0	0	0	0	0.666667	1	1	0	0.666667	0.666667	1	0.333333	1	0	1	0
525	0.333333	0	0	0.333333	0.333333	1	1	1	1	0	1	1	0	1	1	0.333333	0	1	1	1	0	0.333333	0	1	1	0	0.333333	0	0	0.666667	0	0	1	1	1	0.333333	0	0.333333	0.333333	0.333333	0	0.333333	1	0.333333	0	0.666667	0	1	0
526	0.666667	0	0	0.333333	0	0	0.333333	1	0	0.333333	1	1	0	0	1	0	0	0	0.666667	1	0	0.666667	0.333333	0.666667	0	0.333333	0.333333	0.333333	0.333333	0	0.333333	0	0	1	1	0.333333	0	1	0.333333	1	1	0.333333	0	1	0.333333	0.333333	0	0	1
527	0	0	0	0	0	1	1	0.666667	1	0	1	1	1	1	0	1	0.666667	1	0	0	0	0	0	0	0.333333	0	0	0	1	0	0	1	0	0.333333	0	0	0.333333	0.666667	0	0	1	0.333333	0	0	0	0.333333	0	0	0
528	0	0.333333	0.333333	0	0	0	0	0.333333	1	0	0.666667	1	0	0.666667	0	0.333333	0	0	0	1	1	0.666667	1	0	1	1	0	0	0	0	0	0.333333	0	1	1	0	0.333333	1	0	0	0	0	0	1	0.333333	0	0	0	0
529	0	0	0.333333	0	0.333333	0.333333	0	1	0	0.333333	0.333333	1	1	1	1	0.666667	0	0.333333	1	1	1	0	0.333333	1	1	0	1	0.333333	0	0	0.333333	1	0.333333	0.666667	1	0	0.333333	1	0	0	0.666667	1	0	0	0	0	0	0	0.333333
530	0.333333	0.666667	0	0	1	0	0	0	0	0.333333	0	0	0.333333	0	1	0	0.333333	0	0	0	0.333333	0.333333	1	0	0	0.666667	1	0	0	0	1	0	1	0.333333	0	1	0	0.333333	1	1	1	1	1	1	1	0	1	0	0.666667
531	0	0.666667	1	0	1	0.333333	0.666667	0	1	0	0	0	0	0	0	0.333333	0	0	0	0	0.333333	0	1	0.333333	0	0.666667	0	0.333333	0	0	0.333333	0	0	0.666667	0	0	0	1	0	0	0	0	0	0	0	1	0	1	0
532	0.333333	0	0	0	0	0	0	1	1	0.333333	0.333333	0	0	0	0	0.333333	0	0	1	0	0	1	1	1	0	1	0	1	0	1	0	1	0	1	1	0	0	1	1	0	1	1	1	1	1	0	0	0	0
533	1	0	0	1	0	1	1	1	0	0	0	1	0	1	0	0.666667	0	1	0	0	0	0.666667	0	1	0	0.666667	0	1	0	0	0	1	1	1	0	0.666667	0	0	0	0	0	0.333333	0.333333	0.333333	0.333333	0.333333	1	0.333333	1
534	1	1	0.666667	0	0	0.333333	0	0	0	1	1	0.333333	0.666667	0.666667	0	0.333333	0	1	1	0.666667	1	0.333333	0	0.333333	1	1	0	0	0	0	0.333333	1	0	0	1	0.333333	0	0	0.333333	1	1	1	0	1	1	1	0.333333	0.333333	0.333333
535	0	0	1	0	0	0.333333	0.333333	1	0	0.333333	0.666667	0	1	0.666667	0	0.333333	0.333333	0	0.333333	0	0	0.333333	1	1	0.333333	1	0.333333	0.333333	0	0	0.333333	0.666667	0	0	1	0.333333	0	0	0	0.666667	0	0	0	1	1	1	0	1	0.333333
536	0	0	1	0	0.666667	0.333333	0	0.666667	0	1	1	0	0	0.666667	0	0	1	0	1	1	0.333333	1	0.666667	1	0	0	0.333333	0.666667	1	1	0.333333	0.666667	0	0	0	0.333333	0	0	0	0	0	0.666667	1	0	1	1	1	0.333333	1
537	0	0.666667	0	0	0.333333	0.666667	0	0	0.333333	1	0.333333	1	0	0.666667	0	1	0	1	1	0	1	0	0.666667	1	0	1	0.666667	0.333333	0.666667	1	0.333333	1	0	0	0.333333	0	0.333333	0	0	0	0	0	0.333333	0	1	1	0	1	1
538	0	0.666667	0	0	0	0	0	0	0	1	1	0.666667	1	1	1	0	0.333333	1	1	1	1	1	1	1	0.666667	0	1	0	0	1	0	0	1	1	0.666667	1	1	1	0	0	0	0	0	0.333333	1	1	1	1	1
539	0	0	1	0.333333	0	1	0.333333	0	0	0.333333	0	0	0	0	1	1	1	0	0	0.333333	1	0.333333	0	1	0.333333	0	1	0	0	0	1	1	0	0.333333	0	1	0	1	0.333333	1	1	0	0.333333	0	0.333333	0.333333	0	0	1
540	1	0.333333	0.333333	0.333333	0	0	0.333333	0	0	0.333333	0	1	0.333333	0	0	1	0	0	0	0	1	0.333333	0	0	1	0.333333	1	0.333333	0	1	0	0.666667	1	0	0	0	0	1	0.333333	0	1	0	0.666667	1	0	0	1	0	1
541	1	0.333333	1	1	0	0	0	0	0	0	1	0	1	0	0.333333	0	0	0	0	1	0	1	0	0.333333	0	0	0	1	0	0	1	0	0.333333	0	0	0.333333	0	0	0	0	1	1	0	0	1	0.333333	1	0	0
542	1	1	0	1	0.666667	0	0.333333	0	1	1	0	0	0	0	0	0.333333	0	0	0	0	1	0.666667	0	0	1	0	0.333333	0	0	1	0.333333	0.333333	0.333333	0	0	1	0	0.333333	1	0	0	0	1	0	0	0	0	0	0
543	1	0.333333	1	0	1	1	1	1	0.666667	0	0	0.333333	0.333333	1	1	1	0.333333	0.666667	0.333333	0	0.666667	1	1	1	1	0	0	0	0	0	0	0	1	0.666667	1	1	1	0.333333	1	0.333333	0	1	0	0.666667	1	0	0	0	0
544	0	1	1	1	0	0	0	1	1	0	1	0.666667	1	0	0.333333	1	1	1	1	1	0.333333	0.333333	0.333333	0.666667	0	0	0.666667	1	1	0.666667	0	0	0.333333	1	1	0.333333	0.666667	1	1	0	1	1	1	0.333333	0.333333	0.333333	1	0	1
545	1	0.333333	1	0	1	1	0.666667	0.666667	0	0	0.333333	1	1	0.333333	1	1	1	0.666667	1	0	0.666667	1	1	1	1	1	0.666667	0	1	0.333333	0.666667	0.666667	0.666667	0.666667	0	0	1	0.666667	1	1	1	0.666667	1	0.333333	0.666667	1	0	1	0
546	1	0	0.666667	0	1	0.666667	0.666667	0	1	0	1	1	1	0	0.666667	0.666667	0	0	1	0	0	1	0.333333	0	0.666667	0.333333	0.666667	0	1	0.333333	0	0.333333	0	0	1	0.333333	1	0.666667	1	0.666667	0	0	0	1	0.666667	0	1	0.333333	0.666667
547	1	1	1	1	0	0.666667	0	1	1	0	0.333333	0	1	0	0	0.666667	1	1	0	0.666667	0	0.333333	0.666667	0	1	0.666667	1	0	1	0.666667	1	0	0.333333	0.666667	1	0.666667	1	1	1	0	0.333333	0	0	0	0.333333	0	1	0	0
548	1	1	1	0	0	0	1	0	1	1	0.666667	1	1	1	0.666667	0	1	1	0	1	0.666667	1	1	1	1	0	0	0.333333	1	0.666667	0	1	0	1	0	0.333333	0.666667	1	1	0	0.333333	0	1	0	0.333333	0	1	0	0
549	0	1	1	0	1	0	1	0	0	0.333333	0	0	0	1	0.333333	1	0.333333	0.333333	0.333333	0	1	0	0.333333	0.333333	0.333333	0	0.666667	0	0	0.666667	0	0.666667	0.333333	1	1	1	0	0.666667	1	1	1	1	0	0.333333	0.333333	0	0.333333	1	1
550	0	0	0.666667	0	0	1	0	1	0.666667	0.666667	1	0.666667	1	0.666667	0.666667	0	1	1	1	0	0.333333	1	0.666667	1	1	0	1	0.333333	1	0	0.333333	0.666667	1	1	1	1	1	1	0.666667	0.333333	0	0.666667	0.333333	0.666667	1	1	0	1	1
551	0	0	1	0	1	0.666667	1	1	1	1	0.333333	0.333333	0	0.333333	1	0	0	0.333333	0	0.333333	0.666667	1	0	0	0.666667	0	0	0.666667	1	0.666667	0.666667	0.666667	0.666667	1	0	0.333333	1	0.666667	1	0	0	0.333333	0	0.666667	0.666667	1	0.333333	1	0.666667
552	1	1	0.666667	0	0	0	1	0.333333	0.666667	1	0	0.333333	1	0.666667	1	0	0.333333	0.333333	1	1	0.666667	1	0.333333	0	1	1	1	0.666667	1	1	1	1	0.666667	0	0	0	1	1	0.666667	0	0	1	0	0	0	1	1	1	1
553	1	0	0	1	0.333333	1	0.666667	0.666667	0	0	0	0	0.333333	1	1	0.666667	0	1	1	1	0.666667	0	1	0.666667	1	0.333333	0.666667	0.333333	1	1	1	1	1	1	1	1	0	0.666667	0.666667	0.333333	0	1	0	0.333333	0	0	0.666667	0.666667	1
554	0	0.333333	0.333333	0	1	1	0	0.333333	0	0	0.333333	0.333333	1	0	0	0.333333	1	1	0	1	0	0	1	0	1	1	1	0	0	0.666667	1	0.333333	0.666667	0	1	0	0	1	1	1	0	0	1	0	0.666667	0	0.333333	0.666667	0
555	0.333333	1	1	1	0	1	0.666667	0.333333	1	1	1	1	0	0	1	0	1	0	1	0.333333	1	1	1	0.333333	0.333333	0.666667	1	0	1	0	0	1	0.666667	0	0.666667	1	1	1	1	1	0	0	1	0	0	1	1	0.666667	0.333333
556	1	0.666667	1	1	0	1	0	1	0.333333	1	0.333333	1	1	0.333333	0.666667	0	0.333333	1	0	0	1	1	1	0.666667	0	1	1	1	0	1	1	1	1	1	0	0.333333	0	0.666667	1	1	1	1	0	0	0	0	0	0	0
557	0	0	0	0.333333	1	1	1	0	1	1	0	0	0	1	0	0.666667	1	1	1	1	1	0	0.333333	1	1	1	0.666667	1	0	0	1	0.333333	1	0	0.333333	0	1	0	0	1	1	1	1	0	0	1	0.666667	1	0
558	0.333333	1	0.333333	0.666667	0	1	0.333333	1	0	1	1	0.666667	1	1	0.666667	1	0	1	0.333333	0	0.333333	0	0.666667	1	1	1	0.666667	0	0	0	0	0.666667	1	0.666667	0	1	0	1	0.666667	0	0.333333	1	0	0.666667	1	0.666667	0	1	1
559	0.666667	0	0	0	0	0	1	1	0.666667	1	0.666667	1	1	1	0.666667	0	0	0	0.666667	1	0.666667	1	0	0.333333	0	0.333333	0.666667	1	1	0.666667	1	1	1	1	1	1	0	0.333333	1	1	1	1	0	0	0	0	0.666667	0.666667	1
560	0.666667	1	1	1	1	1	0.666667	0.666667	1	0	1	0.666667	0.666667	0.666667	0.666667	0	1	0.666667	0.333333	0	0	0.333333	1	0.666667	1	0.333333	1	0	0	0	0	1	0	0	0	0	0.333333	0.666667	1	0	0.333333	0.666667	0	1	0	0.666667	0.666667	0	0
561	1	1	0.666667	0.333333	1	0.666667	1	1	1	0.333333	1	0	0	0.333333	0.666667	0	0.333333	0.333333	0.666667	0	1	1	1	1	0	0.333333	0	0.666667	0	0.666667	0.666667	0.666667	0.666667	0.666667	0	0	1	1	0	1	0.333333	1	0.666667	0	1	1	1	1	0
562	0	1	1	0	1	0	0	0.666667	0	1	0.333333	1	1	0	0.333333	0	1	0	1	0.333333	0.666667	1	0	1	0.666667	1	0	0	0	1	0	0	1	1	0.333333	1	1	1	1	0	1	1	1	1	0.666667	0.666667	1	0.666667	1
563	0.666667	1	1	0.333333	0	0	0.333333	0.666667	1	1	0.333333	1	0	0	1	0	1	1	1	0	0.666667	0	0.666667	0	0.333333	1	1	0.666667	1	0	0	0.333333	0	0	0.333333	1	0.666667	1	1	0.666667	1	1	0.666667	1	0	0.333333	1	0.333333	0.666667
564	0.666667	1	0	0	1	0	1	0.666667	0.333333	1	0	0.333333	0	1	0	1	0	0.666667	0.666667	1	0	1	0	1	0.666667	1	1	1	0.333333	1	0	0.666667	1	0.666667	1	1	0.333333	0	1	1	1	1	0.666667	1	0	0.333333	1	1	1
565	1	1	0.666667	1	0.333333	1	1	0	0.666667	0.333333	1	0.666667	1	0.666667	0	1	1	1	1	1	1	0.666667	1	0.333333	0.666667	1	0	0	1	1	0.666667	1	0	0.333333	1	1	0.333333	1	0.333333	1	0.666667	0	1	1	0.666667	1	1	1	1
566	0	1	1	1	1	1	1	0.666667	0	0	0.666667	0	1	1	1	0	1	1	0	0	0	0	1	0.666667	0.666667	0	0.666667	0.666667	1	1	1	1	0	0	1	1	0	1	1	1	1	1	0	1	0.333333	0	0.666667	0	1
567	0	1	0	0.333333	1	1	1	0.333333	1	0.333333	1	0	0	1	1	1	0.666667	1	1	0.333333	1	0	0	0	0	0	0	1	0.333333	1	1	0.666667	0.666667	1	0.666667	0	1	1	0	0.333333	0	0	0.666667	0	1	1	1	1	1
568	1	0.333333	1	0.333333	1	1	0	0	0	0	1	0.333333	1	0	0	0.333333	1	0	0	0.333333	0	0	0	0	0.333333	0.666667	0	0.666667	1	1	1	0.666667	0	0	0	0.333333	0.666667	0	0.666667	1	0	1	0	0	0	0	0	1	0
569	0.333333	0	1	0	0	0	0.666667	0	0	0	1	0	0	0	0	0.333333	1	0	0	1	0	0	0.333333	0.333333	0	0.333333	0.333333	0	0	0	0.333333	0	1	0	0.333333	0	1	1	0.666667	1	0	0.333333	0	0.333333	0.333333	0.333333	0	0	0
570	1	1	1	0	0	0.333333	0	0	0.666667	0.333333	1	0	1	0.333333	1	1	0.666667	0.333333	0.333333	1	1	0.333333	0.333333	1	0.333333	0.333333	0.333333	0	1	0	0.333333	0	0	0	0	0	1	0	0.666667	1	1	1	0	0.666667	0	0.333333	0.333333	0.333333	0.333333
571	0.333333	0	0	1	0.333333	0	0.333333	0	0	1	0.333333	0	0	0	0	1	0	1	0.333333	0	0.333333	1	1	1	0	1	0	1	0.333333	1	0.666667	0	0.333333	1	0	0	0.333333	1	1	0	0	0	0	0.333333	0	0	0.333333	1	0
572	1	1	0.666667	0	0.333333	0	0	0.333333	0	0.333333	1	0	1	0	0	0	0	0	0	0	1	0	0	0.333333	0	0.333333	0.666667	1	0	0	0	0	1	0	0	0	1	0.333333	0	0	0	1	1	1	0	1	0	0	1
573	0.333333	0	0	0	0.333333	0	0	1	0	0	0	0	0.333333	0.333333	0.333333	0.666667	1	1	1	0	0.333333	0.666667	1	0.666667	1	1	1	1	0	1	1	0.666667	1	1	1	0.666667	1	1	0	0.333333	1	0	1	1	0	0	0.666667	1	0.333333
574	0.333333	0.666667	0	1	1	0	1	0.666667	1	0	1	0.666667	0	1	1	1	1	1	1	1	1	0	1	1	0.333333	0.666667	0	1	1	1	1	1	0	1	0.666667	0	1	0.666667	1	0.333333	0	0	1	0.666667	1	0	0	0	0.333333
575	1	1	1	0	1	1	0	0.333333	1	1	0.666667	0.333333	1	1	0	0	0.666667	1	1	0.666667	0	1	1	0	1	0.666667	1	1	0.666667	1	1	1	1	0.333333	0	0.333333	1	1	0	0	0.666667	1	1	1	1	1	1	1	0
576	1	0.666667	1	1	0.333333	1	1	0.333333	0	0.333333	1	0.333333	1	1	0	0.333333	0.333333	1	1	0.333333	1	0	1	1	1	1	0	0.666667	0.666667	1	0	0	1	1	1	0	0.333333	1	1	0	0	1	0	0.333333	0.666667	1	0.666667	0.666667	1
577	1	1	1	0	0	1	0.666667	0.666667	0	0	0	0	0.666667	1	0.666667	0	1	1	1	1	1	1	0.666667	0	0	0.333333	0.666667	0	1	0	1	0.666667	1	0	0	0	0.333333	1	0	0.333333	0.333333	1	1	0.666667	0	0	0.666667	0	0.333333
578	0.666667	1	1	0.333333	0.333333	0.333333	1	0.666667	1	0.666667	1	0.333333	1	1	1	1	1	1	1	0.666667	1	0	1	0.666667	1	1	0	1	0.666667	1	0	1	0	1	0	1	0.333333	1	0	1	0.333333	0.333333	0.666667	1	0.666667	0	0.666667	0	0.666667
579	0.333333	0	0	0	0	1	1	0.666667	1	0.666667	1	0	0	0.333333	0	0.333333	0	1	0	0	0.333333	1	1	0	1	0.333333	1	1	0.666667	0	0.666667	1	1	0.666667	1	0	1	0	1	1	0.666667	1	1	1	0	0	1	0	0
580	0.333333	1	1	1	0.333333	0.666667	0	1	0	0	1	1	1	0.666667	0	0.666667	0	0.666667	0.666667	1	0.666667	0	1	0.666667	1	0	0	0.333333	1	0	0	1	0	0.333333	1	1	0.333333	0	0.666667	1	1	0	0	1	1	0	1	0	1
581	0	0	0	0.666667	1	0	1	1	0.333333	1	1	0	0	0.666667	0	0	0	0	0	1	0	0	0	0	0	1	1	1	0	0.333333	1	0	0	0	0	0	0	1	0	0	1	1	0.333333	0	0.666667	0	0	0.333333	0
582	0	0.666667	0.333333	1	0	1	0	0.666667	1	0	1	0.333333	0	1	1	0	0	0.666667	0	0	0	0	0	0.333333	0.333333	1	1	0	1	0	0	0	1	0	0	0	0.333333	1	1	0	0.333333	0.333333	0	0.333333	0.333333	0.333333	0	1	1
583	1	0	0	1	1	1	0	0.666667	0	0	1	0	1	0	1	1	0	0.333333	0	0	0	0	0.333333	0	0	1	0.666667	1	0	0.333333	0	0	1	0	1	0.666667	0	0.666667	0	0	0	0	0	0	0	0	1	1	0.666667
584	0	0.333333	0.333333	1	0	1	0	1	0.666667	0	0	0.333333	0	0.666667	0.666667	0.333333	1	0	1	1	1	0	1	0.666667	1	0	0.333333	0	0	1	0	0.333333	0	0	0	0	0.666667	0.333333	0.333333	1	0	0	0.333333	0.333333	1	1	0	0	1
585	0	0	1	0	0.333333	0.666667	0.333333	0.666667	0	1	0	0	0	0	1	0.666667	1	0.666667	0.333333	0.666667	1	0.666667	0.333333	0	0	0	0.666667	0	0.333333	0.333333	0.333333	0	0	0	0	0.666667	0	0	1	0	0	0	1	0.333333	0	0	0	1	1
586	1	0	0.666667	1	0.333333	1	0	0	0	1	0.666667	0	1	0	0.333333	1	0	0	0	0.666667	1	0	1	0	0	0.333333	0.333333	1	1	1	1	0	0	1	1	0.333333	1	0	0.666667	0.666667	1	1	0.333333	0	0	0	0	0.666667	1
587	0	1	1	1	1	0	0	0	0.333333	0.333333	0	0.333333	0.666667	0	0	0.333333	1	0	1	0	1	0.333333	0	0	0	0	0	1	0	0	0	0.333333	0	0	0	0	0	0.333333	0	0	0	1	0	0	1	0.666667	0	1	1
588	0	0	1	0	0.333333	0.333333	0	0	1	1	1	1	1	1	0	1	1	1	1	1	1	0	0.333333	0.333333	0	0	1	1	0.333333	1	0	1	1	1	0	0.333333	1	0	0	1	0	0.666667	1	1	1	1	1	1	1
589	0	0.333333	0	0	0.333333	0.333333	0.333333	0.333333	1	0	0.333333	0.333333	1	0.333333	0	0	0	1	0	0.666667	0.666667	0	0	0.666667	1	0.666667	0.666667	0.666667	0.666667	0	0	0	1	0.666667	0	0	0	0	1	0	0	0.666667	0	0.666667	1	1	1	0.333333	0.333333
590	0	0	0	0	1	0	1	1	0.666667	0	0	0	0	0.333333	0	0.333333	0.333333	1	0.333333	0	1	1	0	0.333333	0	1	0.333333	0.666667	0	0	0	0.333333	0	0.333333	0	0.333333	0.666667	0	0	0	0.666667	0	0	0.666667	0.333333	0.666667	1	1	0.666667
591	0.333333	0	0.666667	1	1	0.333333	0.666667	0	0.666667	0	0	0	0.333333	0.666667	0.333333	1	1	0.333333	0	1	0	0.333333	0	1	1	1	0	0	0.333333	0.666667	0	0.333333	1	0.333333	0	1	0	1	0	0.333333	0.333333	0	0	1	0.333333	0.666667	0.666667	1	0
592	0	1	0	0	1	0	0	1	1	0.333333	0.666667	0	1	0.333333	1	1	0.333333	0.333333	1	1	0.333333	1	0	1	0	1	0	1	0.666667	0	0	0	0.333333	0	1	0	0	0	1	1	0	0	0.666667	0.666667	0	0	1	0.666667	0.666667
593	1	0.333333	0	0	1	0.333333	0.666667	0	0.666667	0	0	0.666667	0	1	1	0	1	1	1	0	1	1	0	0.333333	0	0.333333	0	0	1	1	0.333333	0	1	1	0.333333	0	1	0	0	0	1	1	0	1	1	1	1	0.666667	1
594	0.666667	1	0.666667	1	0	0.333333	0.666667	0	0	0.666667	1	0.666667	1	1	1	1	0	0.333333	0.333333	0	0.666667	0	0.666667	0.666667	0	0.333333	0.333333	0	0	1	0.666667	0.666667	1	0	0	0.333333	0	0.333333	1	0	0.333333	0	0	0.666667	0.333333	0	0	0.666667	0
595	1	1	1	0	1	0	0.666667	0.333333	0	0.333333	0	1	1	0.333333	0	1	1	0.333333	0	0	0.333333	1	1	0.666667	0	1	1	0	0	0.666667	1	1	1	1	0.333333	0	0	1	1	1	0.666667	1	0	0	1	0	0	1	0
596	0.333333	1	0	1	0	0.333333	0	0	1	0	0	0.333333	0.666667	0.333333	0	0	0.333333	0	1	1	1	0.333333	0	0.333333	0	0	1	0.333333	0.666667	0.666667	1	0.333333	1	1	1	0.333333	0	1	0	0	0.333333	0	0	0	1	1	1	1	1
597	0	1	1	1	0	0	1	0.333333	0.333333	1	0.333333	1	0	1	0	1	0	1	1	0.666667	1	1	0	0.666667	0	0.333333	1	0	0	1	0	0.333333	1	0	0.333333	1	0.666667	0	1	1	1	1	0.333333	0	0.666667	0	0.666667	0.666667	1
598	1	1	0	1	0	0.666667	0	0	0	0	0	0	1	0	1	1	1	0	0	0	0	0	0	0.333333	1	0.666667	1	1	0.333333	0	0.666667	0	0.666667	1	0	0	0	0	1	0	0.333333	1	0.333333	1	0.666667	0	1	0	0
599	1	0	0.333333	0	0.666667	0	0.333333	1	0	0	0	0	0.666667	0	0.333333	1	0.333333	1	0.666667	0	1	0	0	0.333333	0.333333	0	0.333333	0.333333	0.333333	0	0.333333	0.333333	0	0	1	0	0	0.333333	0	0	1	0.333333	0.333333	0	0	0	0	0	0.333333
600	0.333333	1	0	0	0.333333	0.333333	0.666667	1	0.666667	0.333333	1	0.666667	0.666667	0.666667	0	0	0	0	1	1	0	0	0	1	0.666667	0	0	1	0	1	0.333333	1	0	0.666667	0	0.333333	0	0	1	0	1	0	0.333333	0.666667	0.666667	0	0	0	0.333333
601	0	0.333333	1	0	0	0	0	0	1	1	0.666667	1	0	1	1	0	1	1	0.333333	1	0.333333	0.333333	0	1	0.333333	0.666667	0	1	0.333333	1	1	0.333333	0.333333	0.333333	0	0.333333	1	1	1	0	1	1	0.333333	0	0.333333	0	0	0	0
602	0	0	1	0	0	0	1	1	0.666667	0	0	1	0.333333	1	0	0.333333	0	0	0	0.333333	0.666667	0.333333	0	0.333333	0.333333	0	0	1	0	0	0	1	0	1	0.333333	0	0	1	0	0	1	0.666667	1	0	0.666667	0	0.333333	0	1
603	1	0.333333	0.333333	0	0	1	1	1	0.333333	0.333333	0	0.666667	0	0	0	1	0	0	0.333333	0	0	1	0.333333	0.333333	0.666667	0	0.333333	0	0.333333	0	1	1	0.333333	0	1	0	0	1	0	0	0.333333	0.666667	0.666667	1	1	0	0.666667	1	1
604	0	1	0.333333	1	1	0.333333	0.666667	0	0	0	0.333333	1	0.666667	0	1	1	0	0.333333	0.333333	1	1	0	1	0	0	0	0	0	1	0	0.666667	1	0	0	1	0.333333	0	1	0.333333	0.666667	0	0	1	1	1	1	0	0	0.333333
605	0.333333	0.333333	0.333333	1	0	0.333333	1	0.333333	0	0	0	0.666667	0	0.666667	0.333333	0	0.333333	0.333333	0.333333	0.333333	1	1	1	0	0	0	0	1	1	0	0	1	0.333333	0.333333	1	0	1	1	0	0	0.333333	0	1	1	0.333333	0.666667	1	1	1
606	0.333333	1	0.333333	0	1	0.333333	1	1	1	0	1	0	0.333333	0	1	1	0	0	1	0	0.333333	1	0	0.333333	0.333333	1	1	0.666667	0	0	0	1	0.666667	1	0	0.666667	0.666667	0	0	0	1	0.333333	0.666667	0	0.333333	0	0	0	0
607	0.333333	0.333333	0.333333	1	0.333333	1	1	1	0.333333	0	1	0.333333	0	0	0.333333	1	0.333333	0.666667	1	1	0.666667	0.666667	0	0	0.333333	0.666667	0	1	0	0	0.333333	0	0.333333	0	0	0	0.666667	0	0.333333	0.333333	1	0.666667	0	0	1	0	0.666667	0.666667	0
608	0	1	0.333333	1	0	0	1	0	0	0.666667	0	0.333333	0	0	0.666667	1	1	0	0.666667	0	0.333333	0.333333	0	0	0.666667	1	0	1	0	0.333333	0.333333	0	0.333333	0	0.666667	1	1	0	0	0	0	0.333333	0.333333	0	0	0.666667	0	0	1
609	0	0	0	0	0.333333	1	1	0.333333	1	0.333333	1	0	0	0.333333	0	1	0	0	0.666667	0	1	0.333333	0.666667	1	0.666667	1	0	0	0.333333	0	0	0	0.666667	0	0	0.666667	0	0.333333	1	0	1	1	0.666667	1	0	0	0	1	0
610	0.333333	0	0.666667	1	0.333333	0.333333	0	1	0	1	0	0.333333	0	0.666667	0	0	0	0.333333	0.666667	1	0	0	1	0	0	0	0.333333	0	0	1	0	0.666667	0	0	0.666667	0.666667	0	0	0.333333	1	0.333333	0	0	0	0.333333	0.666667	0	0	0.333333
611	1	1	0.666667	1	1	0.333333	0.333333	0	0.333333	1	1	0.333333	0	0.333333	0	0	0.333333	1	0.333333	0.333333	0.333333	0	0	0.333333	0	0.666667	0	1	0	0.333333	0	0.666667	1	1	0.666667	0.333333	0	1	0	0.666667	0	1	0.666667	1	0	0	1	0	0
612	1	1	0	1	0	0.333333	0	1	0.333333	0	1	1	0.333333	1	0	1	0	0	0.333333	0	0.333333	1	1	0	1	0	0	0	0.333333	1	0.666667	0	0.333333	0	0.333333	0	0.333333	0	0.666667	0.666667	0	1	0	0.666667	0	0	0.333333	0.666667	0
613	1	1	0.333333	0	0	0	0	0.666667	1	0	0	0	1	0	0.666667	0	0.333333	0	0	1	0	1	1	1	1	0.333333	0	0	0	1	0	1	0	1	1	0.333333	1	1	1	1	0	0	1	1	0	0	1	1	0
614	0.333333	1	1	0	0	0	1	0	0.666667	0	1	0.333333	0	0	0	0	0	1	0	0	1	0	1	0	0	0.333333	0.666667	0.333333	0	1	1	0.666667	0	0	0.333333	0	0.333333	1	0	0	0	0	1	0	1	1	1	1	1
615	1	0	0.666667	1	0.333333	1	0.333333	0.333333	0.333333	1	1	1	0.333333	0	1	0	0	1	0.333333	0	0.333333	0.333333	1	0	0.333333	0	0	0.333333	1	1	0	0	0	0	0	0	0.333333	0.333333	0	1	1	0.333333	0	0	0.333333	0.666667	0.666667	1	0
616	0	1	0	1	0.333333	1	0	0.666667	0	0	0	0	0.333333	0	0	0.333333	1	1	0.333333	0	0.333333	1	0	1	0.333333	0	0	0	0	0	0.666667	1	0.333333	0.333333	0	0.333333	0.666667	0	0	0.666667	0	0	0	0.333333	1	0	0.666667	1	0.666667
617	0	0	1	1	0	0	1	0	0	0	1	0	1	0.333333	0	0	1	0	1	1	1	1	1	0	0.666667	0	0	0.333333	0	0	1	0.666667	1	0	0	1	1	0.666667	1	1	1	1	1	0.666667	1	0	0	0.666667	1
618	1	0.333333	0.333333	1	1	0	1	0	1	1	0.333333	0.666667	0	0.333333	1	0.333333	0.666667	0.666667	1	0.333333	1	1	0.666667	1	0.333333	0.666667	1	0	1	0	0	0	0.333333	1	1	0	0.333333	0	0	1	1	1	0.333333	0	1	0	1	0.333333	1
619	0	1	0	0.333333	0.333333	0.333333	0.666667	0	1	0.333333	0.333333	1	0	0.333333	0.666667	0.666667	0.666667	0	1	1	0	1	0.666667	0	0.666667	0	0	0	0.666667	1	1	0.666667	0.666667	0.666667	1	0	0	0	1	1	1	0	0.333333	0	1	1	0.666667	1	0.333333
620	1	1	1	0.333333	1	0	0.666667	0.666667	0	0.666667	0	0	1	0.666667	0.333333	0	0	0	0.666667	0	0	0.333333	1	0	0.333333	0.666667	1	1	0.666667	0	0	1	1	1	1	0	0.333333	1	1	0	1	1	1	1	0	0.666667	0.666667	0.333333	0
621	0.666667	0	0.666667	0.666667	0	0.666667	0.666667	1	0	0	1	0.666667	0	1	0	1	0	1	1	1	0	1	0	0.333333	0.333333	0	1	1	1	0	1	0.666667	0.666667	1	0	0.666667	0	0	0	1	0	1	0	0.333333	1	0	1	0	1
622	0	0	1	0	0	1	0.333333	0.333333	0.666667	0	0	1	1	0	0	1	0.333333	0	0.666667	0	0	0.666667	0	1	0	0	0	1	0	0	0	0	1	1	1	1	0	0	0.333333	0	0.333333	0	1	0	0.333333	0	0	0	1
623	0.333333	0	0	0	1	1	0	0.333333	0.666667	0	0	0	0	0.333333	0	0	0	1	0	0.333333	0.333333	0.666667	0.333333	1	0	0.333333	0	1	1	0.666667	0	0.333333	0.333333	0	0	0	1	1	1	0	1	0	1	0.333333	0.666667	0	0	1	1
624	0	0	0	1	0	0	0	0	0	1	0.666667	0.666667	0	0	0.666667	1	0	1	0	0.333333	0	1	0	0.666667	0	1	1	0.333333	0	1	0	0	0	0	0.666667	1	0	0.333333	0.666667	1	0.333333	0	0.666667	1	0	1	1	1	0
625	0	0.333333	0	0.666667	0.333333	0	0	1	1	0	0.333333	1	1	0.333333	0.333333	0	0	0.333333	0	1	0	0.333333	0	0	0	1	1	0	0	0	1	0	0.666667	0	0.333333	0	0	1	0	1	1	1	1	0.333333	0	0	0	0.333333	1
626	0	1	0.333333	0.333333	0.666667	0	0	0	0	0.333333	0.666667	0	0.333333	1	0	0.333333	0.666667	1	0	0	0	0.333333	0	0	0.666667	0	0	1	1	0.333333	1	1	1	1	0	1	0	0.333333	0.333333	0.333333	0.666667	0	0	0	0	0.333333	0	1	0
627	1	1	0	0.333333	0	1	0.333333	1	0	1	0.333333	1	0.333333	0	0	0.333333	0.666667	0	0	0.666667	0.666667	0.333333	0.666667	1	1	0	1	0	0	0	0	1	0	0	1	1	0.333333	0.333333	0	0.333333	0	0	1	1	0	0	0	1	0
628	0	0	0	0.333333	0	0	0.333333	0.333333	1	1	1	1	0	0	0.333333	0	0.666667	1	1	1	1	1	0.666667	1	0.333333	0.333333	0.666667	0	0.333333	0.333333	0.333333	1	0	1	0.666667	0	0.333333	1	1	0.333333	0.666667	1	1	0	1	1	1	1	0
629	1	0.333333	1	1	0	1	0	0	0.333333	0.666667	0.666667	0	0	0.333333	0	0	0	0.333333	0.333333	0.333333	0.333333	0.333333	1	0.333333	0	1	1	1	0	0.333333	1	1	0.333333	0	0	1	0.333333	1	0	0	0	0	0.333333	0.333333	1	0	0.666667	1	0
630	0	0.666667	0	0.333333	1	1	1	1	0.333333	0.666667	0	0	1	0.333333	0	1	0	0	0.333333	0.666667	0	0	0	1	0	0	0	0	0.333333	0.666667	0	0	0.333333	1	1	1	1	0.333333	0	0	0.333333	0.333333	1	0.666667	1	1	0	0.333333	0
631	0	0.333333	0	1	0	1	0	0.333333	0	0.333333	1	1	0	0.333333	1	1	0	0	0.666667	1	1	0.333333	1	0	1	1	1	0	0.666667	0.666667	0	0	0.333333	1	0	0	0	1	1	0	0	0	0	0	1	0	0	0	1
632	0	1	1	0.333333	1	0	1	0	1	0.333333	0.333333	1	0	1	1	1	0	0	1	1	1	0	0.333333	0	0.333333	0	0	0.333333	1	1	0.666667	0	0	0	0.333333	1	0.333333	0.333333	0.333333	0	0	0	1	0.333333	0.666667	0.333333	0	1	0
633	1	0.333333	0	0	0	0.333333	0	1	1	1	0.333333	0.333333	1	1	1	1	0.333333	0	0	0	1	1	0.333333	0	1	1	0.333333	1	0	1	1	0.333333	1	0	0.333333	1	0	0.333333	1	0	0.333333	0.666667	0	0	0.666667	0	0.333333	0	0
634	1	1	1	0	0.333333	0.666667	0	1	0	0.666667	1	1	1	0.333333	0	1	0.333333	0	0	0.333333	0.333333	1	0	0.333333	0	0.333333	0.333333	0.666667	1	0.333333	1	0	1	0.333333	0.333333	0	0.333333	1	0	1	0.666667	0	0	0.333333	0.666667	0.666667	1	1	0
635	1	0	1	1	0.666667	0	0	0.333333	0	1	0.333333	0.333333	1	0.333333	0	1	1	0	1	0.333333	0	0.333333	0	1	1	0	0	0	0	1	1	1	1	0	1	0.666667	1	1	0	0.333333	0.333333	0	0.333333	0.333333	0	0	0	1	0
636	1	1	0	0	1	0	0	1	0.333333	0.333333	1	0	0.333333	0.333333	1	1	1	0	1	1	1	0.333333	0.666667	0	0	1	0	1	0.333333	1	1	1	0	0.333333	1	0	0.333333	0.333333	0	1	1	0	0.333333	1	0	0.666667	0	0	0
637	0.333333	1	0.333333	0	0	0.333333	0.333333	0.333333	0.333333	1	0.333333	1	0	1	1	1	0	0.333333	0	1	0.333333	0.333333	0	0	0.333333	0.666667	0	0.333333	0.666667	1	0	0.333333	0	1	1	0	0	1	0	0.333333	0.666667	0	0	1	0.333333	0.333333	0.333333	1	0.666667
638	0.333333	0.666667	1	0.333333	0	0	0	0	0	0.333333	0	0	0	1	0	0	0.333333	1	0	0	0	1	1	0.333333	0.666667	0	0	0.333333	0.333333	1	0	0.666667	0	0	0	0	0	0	0.666667	0	0	1	0	0.333333	1	0	0.333333	1	1
639	0.333333	0	0	0.333333	0.666667	0.666667	0.333333	1	0	0	0	0	1	1	1	0.333333	0.666667	1	0	0.333333	1	0.666667	0	0	0	0	1	0	1	0	1	1	0	0.666667	0	0	0.333333	0.333333	0.333333	1	1	0.333333	0.333333	0	0	0.666667	0	1	0.333333
640	0.333333	0	0	0.333333	0.666667	0	1	0.666667	0	0	0.666667	1	0.333333	0	1	1	1	0.666667	0	0.333333	0.333333	0.333333	0	0.333333	1	1	1	0	1	0.333333	0	1	0	0	0.666667	0	0.666667	0	0	0.333333	0	0	0.333333	0	0	0.666667	1	1	0.333333
641	0.666667	0.666667	1	0	1	0	0.333333	0	1	0.333333	1	0.333333	0.666667	0	0.333333	0	1	0	1	0	0	0.333333	0	0	0	0	0.333333	0	0.333333	0.666667	0.666667	1	0	0.333333	0.333333	0.333333	1	0.333333	0	0.333333	0.333333	0.666667	1	0.666667	0	0	1	1	0.666667
642	0	0	0	0	0	0	1	1	1	0	0	1	1	0	0	0.333333	0.666667	1	0	0	1	1	0	1	0	0.333333	0.666667	0	1	0	0	0	0.666667	0.333333	0.333333	0	0.333333	0.333333	0.333333	0	0	0	1	1	0	1	0.333333	0	0.333333
643	0	0	1	1	0	0	0.666667	1	0	0.666667	0	0.333333	0	1	1	1	0	1	1	0	0.333333	0	0	0	1	0	0.333333	0	0	0.333333	0	0	0.333333	0.333333	1	1	1	0	0	0.666667	0	0.333333	0	0	0	0.666667	0	0	0.666667
644	0.666667	1	0.333333	0	0	0	0	0	0.666667	1	0	0.333333	0	0.333333	0.333333	0	0	0	1	0	0	0	0	0.333333	0	0	0	1	0	0	1	0	0	0	0	0.666667	0	0	0.333333	0	0.333333	0	1	0	0.666667	0	0	0	0
645	0.333333	0.333333	0	1	0	0.333333	1	1	1	0.666667	0	0.333333	1	0	0	1	0	1	1	0	0	0	0.666667	0	1	1	0.333333	0	0.666667	0	0.333333	1	0.333333	0	1	0	1	0	0	0	0.666667	1	0.666667	1	0	1	0	0.333333	0
646	0	0	0	0.333333	0	1	1	0.333333	0.666667	0	0	0.333333	0	0.333333	1	1	0	0	0	0	0	0.333333	0.333333	0.333333	1	0.666667	0	0	0	0	0	0.333333	0	0	1	0	0.666667	1	0.666667	1	1	0.333333	0	1	0	0.333333	0	1	1
647	1	0	0	0	0	0.333333	0	0.666667	1	0.333333	1	0	1	0.333333	0.333333	0	0	1	1	0	0.666667	1	1	0.333333	0.333333	1	0	0.666667	1	0	0	0	0	0	0	0.333333	1	0	0.333333	0	0	0	0.666667	0	0.333333	1	1	1	1
648	0.333333	1	0	1	0	0	0.333333	0	0	0	0.333333	1	0.666667	0	0.333333	0.666667	0	0.333333	0.333333	1	0	0.333333	0.666667	1	1	0	0.333333	1	0.666667	0	1	0	0.333333	0	0	0.333333	0	1	0.333333	0	0	0.333333	0	0	0	0	0.333333	0	1
649	0	1	0	0	0	0	0.666667	0	0.333333	1	0	0.333333	0	0.333333	0.666667	0	0	0.333333	1	1	0.333333	1	0	0	0	0	0.333333	1	0	0.333333	0	1	0	0	0.333333	0	0	1	0	0.666667	0.666667	0	1	1	0	0	0	0.333333	0
650	0	0	0.333333	0.333333	1	0.666667	0	1	0.333333	0	0.333333	0.333333	1	1	0.333333	0	0	0.333333	0.333333	1	1	0.333333	0.666667	0	0.333333	0.333333	0	1	1	0.333333	0	0	1	0	1	0.333333	0.333333	0	0	0.666667	1	0	0.666667	0	0.666667	1	0	0	0.666667
651	0.666667	1	0	0	0	0	0	0	0.333333	0	0.333333	1	0	0.333333	0.333333	1	0.333333	0	0.333333	0.333333	0	0.666667	0.666667	0	1	0.333333	0.333333	0	0	0	1	1	0	0	1	0	0	1	0	1	1	1	0	0.666667	0	1	1	0	0
652	1	0	0	0.333333	0	0.333333	1	1	0	0	0	1	1	1	0	0.333333	1	0	0	0.333333	1	1	0.333333	0	0	1	0.666667	1	0	0	0	0.333333	0	0	0	0	0.333333	1	0.333333	0.333333	0	0.333333	0	0	0	0	1	0	0
653	1	0.666667	0	0	0.333333	1	0	1	1	1	1	0.333333	0	0.333333	1	1	0	0.333333	0.666667	0	0.333333	0	0.666667	1	1	1	0.666667	1	0	0.666667	0.666667	0	0.666667	0	0	0.333333	0.666667	0	0	0.666667	1	0.333333	0.333333	0	1	1	0	0.666667	1
654	0	0.333333	0.666667	1	0	1	0.333333	0.666667	0.666667	0.666667	1	0	1	0	0.333333	1	0.333333	0	0.666667	0.666667	1	1	1	0	0.666667	0	0	0	1	0.333333	0	0	1	0	1	0.333333	0.666667	0	0	0.666667	1	0.666667	1	0	0	0.666667	0	1	1
655	0	0	0	0	0.666667	0.666667	0.666667	0	1	0.666667	0	0.333333	0	0	0.666667	0	0.333333	0	1	1	0.333333	1	0	1	1	1	0	0.666667	1	1	0.666667	1	0.666667	0.666667	0.666667	0	1	0.333333	0	0.333333	0	0.333333	0	1	1	1	0	0.666667	0
656	0.666667	1	0	0	1	0.333333	0	0	1	1	0	0.666667	0	0.333333	0.333333	0.666667	0	0.666667	1	0	0.333333	0.333333	0	0.333333	0.333333	1	0	1	0	0.333333	0	0	0	0.666667	0.666667	1	0	1	0.666667	0	0	0	0.666667	1	0	0.333333	0	1	0
657	0	0.333333	1	1	0	0.666667	1	0	0	0	1	0	1	0	0	0.666667	1	0.333333	0	0	0	0	1	0.333333	0	1	0	0.333333	1	1	1	1	0.333333	0	0.666667	0.333333	0.666667	0	0.333333	1	0	0	0.333333	1	0.333333	0.333333	0	0	0
658	0	0	0	0.333333	0.666667	0	0	1	1	0.666667	1	0	0	1	0	0	0.666667	0	0	1	0.333333	1	1	0	0	0	0.666667	0	0	0	0.333333	1	0	0	0.666667	0	0.333333	0	0	1	0	1	1	0.333333	0	0.666667	1	0.333333	0
659	0.666667	1	0	0.333333	0	1	1	0	1	0	1	0.333333	0.666667	0	0	1	0	0.333333	0.666667	1	0	0	1	0	0.333333	1	0.333333	1	1	0.333333	0.333333	0	0.333333	1	1	0	0	1	0	0	0	0.333333	0.666667	0	1	1	0	1	1
660	1	1	1	1	1	0	0	0	0.666667	0	0.333333	0.666667	1	0	0.333333	0.333333	0	0	0	0	0.333333	0	1	0	1	0	0	0	0.333333	0.333333	0	1	1	1	0	0	0	1	0	0	0.333333	0	0.333333	1	0.333333	0	0	1	0
661	0.333333	1	0.333333	0.666667	0	0.333333	0.666667	0	1	0	1	0.333333	0	0.333333	0	0	0	0.666667	0	0	0.333333	0.666667	0.666667	1	1	1	0	0	0.333333	0.333333	0.333333	1	0.333333	0.666667	0	1	0	0	0.666667	0	0.333333	0.333333	0	0.333333	0.333333	1	0.333333	0	1
662	1	1	1	0.666667	0	0.333333	0	0.666667	0	0.333333	0	1	0	1	0	1	0	0.666667	0	0	0.333333	0.666667	1	1	1	1	0.333333	0.333333	0	0.666667	1	0.333333	0	0.666667	0.666667	0.666667	0	0	0	0.333333	0.333333	1	0	0.666667	0	0	0.333333	0	0.333333
663	0	0.333333	0	0	0.333333	0	1	0	0	0	1	1	1	1	1	0.666667	1	1	1	0	1	0	0.666667	1	1	0.666667	1	1	0.666667	1	1	0	0.333333	1	0	0	1	0.666667	0.666667	1	0.666667	0	0	0	0.666667	0	0	0.666667	0
664	1	1	0	0.666667	0.666667	0	0	0.333333	1	0	0	0.666667	1	0	0	0	0	0	0	0.666667	0	0	0.666667	1	0	0.333333	0.666667	0	1	1	1	1	0.333333	0.333333	0	1	0.333333	0.333333	0.333333	0.333333	1	0	0.666667	1	0.666667	0	0.333333	0	0
665	0	0.333333	0.666667	0	1	1	0	0	1	0.333333	0.333333	0	1	0	0.333333	0	1	1	0.666667	0.333333	1	0	0	0	1	0.666667	0	0.666667	0.666667	0	1	0	0	0.333333	1	0.333333	1	0	1	1	0	0	0	1	0	1	0	0	1
666	0	0.333333	0	0	0	1	1	0.333333	0.666667	0.666667	0	1	0	0	0	0	0	0	0.666667	1	0.333333	0.333333	0.333333	0.333333	0.666667	0	0	0	1	0	1	0	0	0.666667	1	1	0	0	0.666667	1	0	0	0	0.333333	0.333333	1	0.333333	0.333333	1
667	0	0.333333	0	1	1	1	0	0.666667	1	1	0	0	1	0	0	0	0.333333	0	0	0.666667	1	0.666667	0	0	0	0.333333	0	0	0.333333	1	1	0	0	0	0.333333	0	1	0	1	1	0.333333	0	0.333333	1	1	0	0	1	0
668	1	0.666667	0.666667	0	1	0.666667	0	0	1	0	0.333333	0	0	0	0	0	1	0.666667	0	0.333333	0	1	0	1	0	0	0.333333	0	0	0	0	0	1	0	1	1	1	0.333333	0	0.333333	0.333333	0	1	1	0	1	1	0	0.666667
669	0	0	0	1	0.333333	0.333333	0.333333	0.333333	0	1	1	0.666667	1	1	0	0.666667	0.333333	0	1	0	0.666667	0.333333	1	0.666667	0.333333	0	0.666667	0.333333	0	1	0	0.666667	0.333333	1	0.333333	0	0	0.666667	0.333333	0	0.333333	1	0.666667	0.333333	1	0	0.666667	0.666667	0
670	0.666667	0	0	1	0	0	0.666667	0	0	1	0	0	0.333333	0	0	1	0	0	0.666667	0	0	1	0	0	0.333333	0	0	1	0	0	0.666667	0	0	1	0	0	0.333333	0	0	1	0	0	0.666667	0	0	0.666667	0	0	0.666667
671	1	1	0.666667	0.333333	0.333333	1	0.333333	0.333333	1	1	0.333333	1	0.333333	0.333333	0	1	0	0	0	0	1	0	0	0	0	0.666667	0	0	1	0	0.666667	1	1	1	0.333333	0	1	1	1	0	0.333333	0	0	1	0.666667	1	0	0	0
672	0	0	1	1	0.333333	1	1	0.333333	0	1	0	1	0	1	1	0.666667	0	1	0	0.666667	0	1	0	0.666667	0	0.333333	0.333333	0	0	0.333333	0	0.333333	0.333333	0	0	1	1	0.333333	0	0.666667	1	0	1	1	1	0	0.333333	0	0.333333
673	0.333333	1	1	0.333333	0.333333	1	0	0	0	0	0	0	1	0	0.666667	0	0.333333	0	1	0.333333	0.333333	0	0.333333	1	0	0	0	0	0	0.333333	1	0	1	1	0	0.666667	0	0.333333	0.333333	0.666667	1	0	1	0.666667	1	0.666667	0	1	0
674	0	0.333333	0	0	0.333333	0	1	1	0	1	0	0	0.333333	0.666667	0.666667	1	0	1	0	0.666667	0.666667	0	0	0.333333	1	0	0.333333	0	0	0	0	0	0	1	0	0	0.333333	0	0.666667	1	0	0	0.333333	1	1	1	0.666667	0	1
675	0.333333	0	0.666667	0	1	1	1	0	0.666667	1	0	0	0.333333	1	0	1	0	0.666667	0.333333	1	0.666667	1	0.333333	0	1	0.333333	0	0	0.666667	1	0	0.333333	0	0.666667	0.333333	0	0.333333	0	1	1	0	1	1	0	0	0	0	0	0.333333
676	0.333333	0	0	0.333333	1	1	0.666667	0	0.333333	1	1	0.333333	0	0	1	1	0	0	0	1	0	0.333333	1	0.666667	1	0	0.333333	0.333333	0.333333	0	0.333333	1	0	0.333333	1	1	0	1	0	0.666667	0	0	1	0	1	1	0	0.666667	1
677	0	0	0	0	0	0	1	0	1	1	0.333333	0.333333	0	0.333333	0.333333	0.333333	0	1	0	0.333333	0	0	0	1	0.333333	0	1	0	0	1	0	0	1	1	0	0.333333	0	0	0.333333	1	0.666667	0	0	0.333333	0	1	0	0.333333	0
678	0.333333	0	0.333333	0	0.333333	1	1	0	0	1	0	0.333333	0	0.333333	1	1	0.333333	0	0	0	1	0	0.333333	0.333333	1	1	1	1	0	0	1	0.666667	0	0	0.333333	1	0.333333	1	0	1	0.333333	0.666667	0	0	1	0	0.666667	1	1
679	1	0	0.333333	0	0	0	0	0	1	0	0.333333	0.333333	1	0.333333	0	0	1	0	1	0.333333	0	0	0	0.333333	1	0	1	1	0.333333	0	0	0	0.333333	0	0.333333	0.666667	1	0	1	0.333333	0.666667	0	0	0.333333	1	0.333333	1	1	0
680	0.333333	0	0	0.333333	1	1	1	0	1	1	0.333333	0	0	0	0	1	0.333333	0.333333	0	0.333333	1	0	0	0.333333	0	0	0.666667	0	0.333333	0	1	1	0	1	0	1	0	0.333333	0	1	1	0.666667	1	1	0.333333	1	0	0.333333	0
681	1	0.666667	0	0	0.333333	0	0.333333	0	0	0	0.333333	1	0	1	1	1	0.333333	0	0	0	1	0.333333	0.666667	0.666667	0	1	1	1	0.333333	0	0	1	0	0	0	0	0	0.333333	0.333333	0.333333	0.333333	0.333333	0.333333	0	0	0.666667	1	0	0
682	0.333333	1	1	1	0.333333	0.333333	0.333333	1	0.333333	0.333333	0	1	0.333333	0.666667	0	0.333333	0.333333	0	0	0.666667	0	1	1	1	1	1	0	0.333333	0	0	0	0.333333	0	0	0.666667	1	0	0	0.333333	0.333333	0	1	0	1	0	0.333333	0	0	0.333333
683	1	1	1	0	0	1	0.666667	1	0	0	0.333333	0	0	0	0	0.333333	1	0	0	0.333333	0	0.333333	0	1	0	0.333333	0	0	0	1	0	0	0	0	0	0	0	1	0	0	0	1	0.333333	1	0	0	1	1	0.333333
684	0	0	1	0	0	1	0.333333	0	0.333333	0.333333	0.333333	0.333333	0.666667	0	0	0.333333	0.333333	0	0	0.333333	0	0	0	0	0.333333	0.333333	1	0	0	0	0	0	0	0.333333	1	0	0.333333	0	0.333333	1	0.333333	1	1	1	1	0	0	1	0
685	0.333333	0	0	0	0.666667	1	0	0	0	0.333333	1	0	1	1	1	0	0	1	0	0.666667	1	0.333333	0.666667	1	0.333333	1	1	0.333333	0	0	0.333333	0.666667	0	0	0.333333	1	0	0	0	1	0	0.666667	0.333333	1	0	1	0	1	1
686	1	0	1	0	1	1	0.333333	0.666667	1	0.666667	0	1	1	1	0	0.333333	0.666667	0	0	0.333333	0	0	0.666667	0	0.333333	0.333333	1	0	0	0.333333	0.333333	1	1	1	0.666667	1	0	0	0	0	0	1	0.333333	0.333333	0	1	0.333333	0.333333	0
687	0	1	1	0.666667	0	0	0.333333	0	0.333333	0.333333	1	0.333333	0	0.666667	0	0.333333	0	1	0.333333	0.333333	1	0	1	1	0.333333	0.333333	0.666667	0	0	0	1	0.333333	1	0.333333	0.333333	0	0	0.666667	0	0	0.333333	1	0	0	1	1	0	0	0.333333
688	0.333333	0	1	0	1	1	0	0	0	1	0	0	0.333333	0	0	0	0	0	0.333333	1	0.333333	1	1	0.666667	1	0.333333	1	1	0	0	1	0	0	0	0.333333	0.666667	1	0	1	1	0.333333	0	1	0	1	0	0.333333	1	1
689	0	0	0.333333	1	0	0	0	1	0	1	0.333333	0	0.333333	1	0.333333	0.666667	0.333333	0	0.333333	0.333333	0.333333	0.333333	0	1	0.333333	1	1	0	0	0.333333	0	0	0	1	0.333333	0	0.333333	1	1	1	0	0	1	1	0	0	0.333333	1	0
690	0	1	1	1	1	0.333333	0	0.333333	0	0	0.666667	0.333333	0	0	0	0	0.333333	1	0.333333	0.333333	0	1	1	1	0	1	1	0.666667	0	0.333333	0.666667	0	0	0.666667	0	0	1	0	0	1	0.333333	1	0.333333	0.333333	0	0.333333	0.666667	0	0
691	0.333333	1	1	1	0	0.333333	1	1	0	1	0.333333	1	1	0.333333	0	0.666667	0	0.333333	0	0.333333	0.333333	0.333333	1	1	0.333333	0.666667	0	0	0	1	0.333333	0.333333	0.666667	0	0.333333	0	0	0	0.333333	1	0.666667	1	0.666667	1	0	0	1	0.333333	1
692	0.666667	1	0.333333	0.333333	0	0.333333	0	0	1	0.333333	0.333333	0.333333	0.666667	1	0	0.333333	0	0	0	0.666667	0	0	1	0.666667	0	0	0.333333	0	0	0	1	1	1	0.333333	1	0.333333	0	0.333333	0.333333	0.333333	0.333333	0.333333	0	1	0	1	0	1	1
693	0	1	0	0	1	1	1	0.666667	0.666667	0	1	0.333333	0	0.666667	0	0.666667	0	0	0.333333	0.666667	0.666667	0	0	1	0	1	0.333333	0.333333	0	0.333333	1	1	0.333333	1	0	0	0	0	0	0.333333	0.333333	0.333333	0	1	0	1	1	0.333333	0.333333
694	1	0	1	0	1	1	1	0.333333	0.333333	0	0	1	0.333333	0.333333	0.666667	0	1	1	0	1	1	1	0	0	0	0.333333	0	0	0	0.666667	1	1	0.333333	0	0	0.333333	0.333333	0	0.333333	0	0	1	0.333333	0.333333	0	1	0	0.333333	0
695	0	0	0	0.666667	0	0.333333	0	0	0	1	0	1	0	1	0.666667	0	1	0	0.333333	0.666667	0	0.333333	0	0.333333	0	1	1	0	0.666667	0	0	0	0	1	0	0.333333	1	1	0.333333	0.333333	1	0	0	1	0.333333	0	0	1	0
696	0	0.333333	0.333333	0	0	0.333333	1	0.666667	0	0.333333	0	0	0.666667	0	0.333333	0	0.333333	1	1	0.666667	1	1	0	0.333333	0	0	0.666667	0.333333	1	0	0	0.333333	0.333333	0	0.333333	0	0.333333	1	0.666667	1	1	0.333333	0	0.333333	0	0	1	0.333333	0
697	0	0.333333	1	0.333333	0.666667	0.333333	0	1	0	1	1	0	0.333333	1	0	0	1	0	0.333333	0.333333	0	0	0.333333	1	1	1	1	0	1	0	0.333333	0.666667	1	0.333333	0.333333	1	0	0.333333	0	0.333333	1	1	1	0	1	0.333333	0	0.333333	1
698	0.666667	1	0	0	0	0	0.333333	0	0.333333	1	0.333333	1	0.333333	0	0	0	0	1	1	0.333333	0.666667	0.333333	0	0.666667	0	0	1	0	0	0	0	0.333333	0	0.333333	0.333333	1	0.333333	1	0	1	0	0	0.333333	0	0	1	0.333333	0.333333	0
699	0	0	0	1	0.333333	0	1	0	0	0	1	0.333333	0.666667	1	1	0.666667	1	0.333333	1	0	0	0	1	1	0	1	0	1	0	0.666667	0	0.333333	0	1	0.333333	0	1	0	1	0.333333	1	0.333333	0	0	0	0.333333	1	1	0.666667
700	1	1	0	1	0	0.333333	0.666667	0	0.333333	0	0.333333	0.666667	0.333333	0	0.333333	0.333333	0	0	0.333333	0	0.333333	1	1	0	0.333333	0	0	1	0	1	1	0	0.333333	0	1	1	1	0	0.333333	0	0	0	0.666667	1	0	0	0	0.333333	0
701	1	0	1	1	0	0	0	0	0	0	1	0	0	0	0.666667	1	0.666667	0.333333	0	0.333333	0.333333	0	0	0	1	0.333333	1	1	0	0.333333	0	0	0.333333	0	0	0	1	0	1	0	0	0.333333	1	0.333333	0	0	0	0	1
702	0	0.666667	0	0.333333	1	1	1	0	0.333333	0	0.333333	0	0.333333	1	1	0	0.666667	0	0	0	0	1	0	1	0.666667	1	1	1	1	0	0.333333	1	0	1	0	0	0	1	1	0	1	1	0.333333	1	1	0.333333	0	0	0.333333
703	1	0.666667	1	0.666667	0	0	0	0	0	1	0.333333	0	0	0	0	1	0	0	0.333333	0.333333	0	0.333333	0.333333	0.666667	0.333333	1	1	0.333333	1	0	1	1	0.333333	0.666667	1	1	0	0.666667	0	1	1	1	1	1	0	0.333333	0	1	1
704	0	1	0	0.333333	0.333333	1	0.333333	0.333333	0.666667	1	1	1	0	0.333333	0.333333	0.666667	1	0	0.333333	0.333333	0.333333	0	1	0.333333	0.333333	0	0	0	0	0	0.333333	0.666667	0	0.333333	0.333333	0	0.666667	0	1	0	0	0	1	0.333333	1	1	1	0.333333	0.333333
705	1	0	1	0.333333	0	1	0	0	0	1	1	0.666667	0.333333	0.666667	0	0	0	1	1	1	0	0	0.333333	1	1	0	1	0	0	1	0.333333	0.666667	0.666667	0	1	0.333333	0.666667	0	0.666667	0	0	0	0.666667	0.666667	0.333333	0	0	0.333333	0.333333
706	1	1	1	0.333333	0	0	0	0.333333	0	0.333333	0	1	0	1	1	0	0.333333	0	0.333333	0	0	0	1	1	0	0.333333	0	0	0.666667	0	0.333333	0	0	0	0	1	0	1	0.666667	0.666667	0.666667	0	0	0.333333	0	0.333333	0.666667	0	0.333333
707	1	1	1	0.333333	0.333333	0	1	1	0.666667	0.666667	0.666667	0	1	0.333333	1	0.666667	0	0	0.333333	0	0.666667	0	1	1	1	0.666667	1	0.333333	1	1	0.333333	0.666667	0	0.333333	0.333333	0.333333	0	0	0	0.666667	0	0	1	1	1	0.333333	0.333333	0	1
708	0.666667	0.333333	1	1	0.666667	0	0	0.333333	1	1	1	0	1	1	1	1	1	1	0	0.666667	0	0.333333	1	1	0	0.666667	0	0	0	0	0.666667	1	1	0	1	1	0	0.333333	0	0.333333	0	0	0.666667	1	0.666667	0	0	0	0.333333
709	0.666667	0.666667	0.666667	0	0	0.333333	1	0	1	1	1	0	0.666667	1	1	0	1	1	0.333333	0	0	0	0	0.666667	0.333333	1	1	0	0	0	0	0	1	0.666667	1	0	0.666667	1	1	0	0.333333	1	0.333333	1	1	0	0	1	0.333333
710	1	1	0.666667	0.666667	1	0.666667	0	0	0	0.333333	1	1	0.666667	1	0.666667	0.333333	1	1	0.333333	0	0	0.666667	1	0.333333	0.333333	0	1	0.333333	0	0	0	1	0.666667	0.333333	0.333333	0.666667	1	0	1	0.333333	0	1	0.333333	0.666667	0	0.333333	0	0.333333	1
711	0	0	1	1	0.666667	1	0	0	0	0	0	0.666667	1	1	0.666667	0.333333	0.333333	0	0.333333	1	0	0.666667	0.666667	0.666667	0.666667	0	0	0	0	1	0	0.333333	0	0.333333	0	0	0.666667	0.333333	0	0	1	0	1	1	0.666667	0	1	1	0.333333
712	0	0.333333	0	0.333333	0.333333	0	0.666667	0.333333	0	0	0.333333	1	0	0.666667	0	0.666667	0.333333	0	0	0	0	0.333333	1	0	1	1	1	0.666667	0.666667	1	0	1	0.666667	0.333333	0	0	0	0.333333	0	0	0	0	0	0.333333	1	0.333333	0.333333	0	0
713	0.666667	0	0	0.666667	1	0	0	0	1	0	0	1	0.666667	0.666667	0	0	0.666667	1	0.666667	0	1	0	0.333333	1	0	0.666667	0	0	0	1	0	0.333333	0	0	1	1	1	0	1	0.333333	0	1	0.333333	0.666667	0	0.333333	1	1	0.333333
714	1	0.333333	1	0	1	1	0	0.333333	0	0	0.333333	1	0.666667	0	0.333333	0.333333	0.666667	0	0.333333	0.333333	0	0.333333	0.333333	1	0.333333	0.333333	0	0.333333	0.333333	1	0.333333	0.666667	1	0	0	0	0	0.666667	0	0.333333	0.333333	1	0.666667	1	0	1	0	0.666667	1
715	0	0	1	0	0	0	0	0	0.666667	1	0.666667	1	0	0	0	0.333333	1	0	0	0.666667	0	0	1	0	0	0	1	0.333333	0.666667	1	0	0.333333	0	1	0.333333	0.666667	0.666667	1	1	0	0	0	0.333333	0.666667	0	0	0	0	1
716	0.333333	1	0.333333	0	0.666667	0	0	0	1	0	0.333333	0	0	0	1	1	0.333333	1	0.333333	0	1	0	0	1	0	0.333333	1	0.333333	0.333333	0	0.333333	1	1	1	1	0	0.333333	1	1	0	0	1	0.333333	0.666667	0	0.333333	1	1	1
717	0	0.333333	0.333333	0.333333	1	0	0	0	1	0	0	0	0	0.333333	0	0.666667	0	0	0	0	1	0.333333	0.333333	1	0.666667	0.333333	1	0	0.333333	0	0	1	1	0	0	0	0.333333	0	0	0	0.333333	0.666667	0.333333	0.333333	0	0.333333	0	0	0.666667
718	0.666667	1	0	0	0.666667	0	0.333333	0.666667	1	0.666667	0	0	0.333333	0	1	0	0	0	0.666667	0	1	0.333333	0.333333	0	0	1	1	1	1	0.333333	0	0	0	0	0	1	0.333333	0.333333	0	0.333333	0	1	0	1	0	0	0.333333	0	0
719	0	0	0.333333	0.333333	0	0	1	0.333333	0.666667	1	1	1	0	0.333333	0.333333	1	1	0.333333	0.666667	0	0	0.333333	0.333333	0	1	1	1	0.666667	0.666667	0.333333	0.333333	0	1	0	0	0	1	0	1	1	0	0.666667	0.333333	0	0	0	0.333333	0	0.333333
720	1	0.333333	0.666667	1	0.666667	0	0.333333	0	1	0	0.333333	1	0.666667	0	0	0.666667	1	0.333333	1	0	0.666667	0	0	0	0.666667	0	0	0.333333	0.666667	0.333333	0.333333	0.333333	0	0	0	1	0.333333	0.666667	1	0.333333	1	1	0	0.666667	1	0.333333	0.666667	0	0
721	0.333333	0	0	0	1	0	0.333333	0.666667	0	0	0	0	0	0.333333	0	0	1	0.333333	0.333333	0.333333	0.666667	1	0	0	0.333333	0	0.333333	1	1	0.333333	0.666667	0	0	0	0	1	0.333333	1	0.666667	1	1	1	1	0	0.333333	1	0	1	0.333333
722	0	0.333333	1	0.333333	1	1	1	1	0.333333	1	0	0	0.666667	1	0.666667	1	0.666667	0	0	0	0	0	1	0.333333	0	0	0	0	1	0	0	0.333333	0.333333	0.333333	0.333333	1	0.333333	0	0	1	0	0	0	1	0.333333	1	0.666667	0	0
723	0	0.333333	0	1	0.333333	0.333333	0.666667	0	0	0	0	0	0.333333	0.333333	0.333333	1	1	0	1	1	0.333333	1	1	0.333333	0.333333	0	1	0.333333	0	0	0.666667	0.333333	1	0	0	0.333333	0	1	0	0	0	1	1	0	1	1	0.666667	1	1
724	0.333333	0	0	0	1	0.333333	1	1	0	0	0	0	0.666667	0	0	0	0	0	0.333333	0.666667	0	0.333333	0	0	1	1	0	1	1	0	0.333333	0.666667	1	0	0	0	0.333333	0	1	0.333333	0	0.666667	0	0	0.333333	0	1	0	0.666667
725	0	1	0	0.333333	0	1	0	0	0	0.333333	1	1	0.333333	0	0	0.333333	0	0	0.333333	1	1	0	1	0	0	0	0.333333	0.333333	0	1	0	0.666667	1	0	0.333333	0	0	0.333333	1	0.666667	0	0	0	0	0	0	1	0.333333	0
726	1	0.333333	1	0.333333	0	1	0.333333	0.333333	0	0.333333	0.333333	0	0	1	1	0.333333	0	0	0	1	0	1	0.333333	0	1	0	0	1	0	0.666667	0	0.666667	0	0	0	1	1	1	0	1	0	0	1	0	0.666667	0	1	0.333333	1
727	0	1	0	0.333333	0.666667	0.333333	0	1	0	0.666667	0	0.666667	0.666667	0	0	1	0	0.666667	1	0	0	0	1	0.333333	0	0.666667	1	1	1	0.333333	0	0.333333	0.333333	0.333333	1	0	0.333333	0.333333	0.333333	1	1	0	0.333333	1	0.666667	0	0	0.333333	0
728	1	1	1	1	1	0.666667	0	0.333333	0	0	0.333333	0	0	0.333333	0	1	1	0	0	0.333333	0	0.666667	0	0.333333	1	0	1	0.666667	0	0	0.333333	0	0.333333	0.666667	1	0	0	0	0.333333	0	0.666667	0	1	1	0	0.333333	0	0	0.666667
729	0	1	0.333333	0	0.666667	1	0	1	0	0.333333	1	0	0	0.666667	0	0	1	1	1	0	0	1	1	0	0	0.333333	0	0	0.333333	1	0.333333	1	1	0.333333	0.666667	0.333333	0	0	0.666667	0	0	0	1	1	0	1	1	1	0
730	0.666667	0	1	1	1	1	1	0	0	0	1	0	0	0.666667	1	0.666667	1	0	0	0	0.333333	0	0.333333	0	1	1	0.333333	0.666667	0	0.333333	0.666667	1	1	0	1	1	1	0	1	1	1	0.333333	0	1	0.333333	1	1	0	1
731	0.666667	1	0	0.666667	0	1	1	0	0.333333	0	0	1	0.666667	1	1	0.333333	0.666667	0.333333	0	0.666667	1	1	0	0.333333	0.666667	0	0	1	1	1	0.333333	1	1	1	0	1	0	0.666667	1	0.666667	1	0.666667	0	0	0	0	0	0.333333	0
732	1	1	0.333333	0.666667	1	0	1	0	1	1	0	0	0	0.333333	0.666667	1	1	0.333333	0	1	1	0	0.666667	0	0	0.666667	0	0	0.333333	1	0.666667	0	1	0	1	0	0.666667	1	0.666667	0	1	1	0.666667	0	0	1	0.666667	0.333333	0
733	0	1	0	0	0	1	1	1	0	0	1	0	1	0	0.666667	0	0	0	1	0.333333	1	0.666667	1	0	0	0	0	0	1	0.333333	0	0	0	1	1	0	0	1	0	1	0	0.666667	0	0	0.333333	0	0.333333	0	0.666667
734	0	0	0	1	1	0.333333	0.666667	1	0.333333	0.666667	1	1	1	0.333333	0.333333	1	1	0.333333	0.333333	1	1	1	0.333333	0	0.333333	1	0.333333	0.333333	0	0	1	0.333333	0	0	1	0.333333	0	0.666667	0.333333	0	0	1	0	1	0.666667	0	1	0.666667	1
735	0	0.666667	0	0	0.333333	0.333333	0	1	0.333333	0.666667	0	0.333333	0	0	0	0	0.333333	0.333333	0	0	0.333333	0	0	0.333333	0.666667	1	0	0	1	1	0.666667	1	0	0	0.333333	1	1	1	0	1	1	0	0.666667	0	0.333333	0	0.333333	1	1
736	0.666667	1	0	0	0	0.333333	1	0.333333	0	0	0	0.333333	0	1	0.333333	0	0.666667	0	0	0.333333	1	0	0.666667	0	0	0.333333	0	0.666667	1	0	0	0.333333	0	1	0.333333	1	1	1	0	0	0	0	0.333333	1	0	0.666667	0	0.333333	0.666667
737	1	0	0	0.666667	1	0	0	1	0.333333	0.666667	1	0.666667	1	1	0.333333	0.333333	0	0	0	1	0.333333	0	1	0	1	0	0	0	0	0.666667	0	0.333333	0.333333	0.666667	0	0.333333	0	0	0.333333	0	1	0.333333	1	0	0	0.333333	0	0	0.333333
738	0	1	0	0.666667	1	1	1	0.333333	0	0	0	0.333333	0	0	0	0	0.333333	0.666667	0	1	0.333333	0	0	0	1	1	0.333333	0	1	0	1	0	0	0	1	0	0	1	1	1	1	0.333333	1	1	0.333333	0	1	0	0
739	0	1	0.333333	0	1	0	0	0.333333	1	1	0	0	0	0	0.333333	0	1	0	0.333333	1	1	1	1	0	0	0	0.333333	0	0	0.666667	0	1	0	1	0.333333	0.333333	0	0	0.333333	0	0	0	0	0	0.333333	0.333333	1	0.666667	1
740	1	1	0	0.333333	1	0	1	0	0.333333	0	1	0	0	0	0	0	0	1	0.333333	0.333333	0.333333	1	1	0.333333	0	1	0	0	0	0	0	0.333333	0.666667	1	1	0	0	0	0	0	0.333333	0	0.333333	0	0	0	1	0	1
741	0	1	0.333333	0.333333	0.666667	1	1	1	0.333333	0	0	0	1	0	0	0	0	0.333333	0.333333	1	0	0	0.666667	1	1	0	0	0.666667	1	0.333333	0	1	1	1	1	0.333333	0	0.333333	0.333333	0	0.666667	0.666667	0.666667	0	0	1	0.333333	0	0
742	0.333333	0	0.666667	0	0	0	0	1	0.666667	0	0	0	0	1	0.333333	0.333333	0.333333	1	0.666667	1	0	1	0	0.333333	0	1	0	1	0	0.333333	1	1	0	1	1	0	0	0.333333	0	0	1	0.333333	1	0	0	0.666667	0	1	1
743	0	0.333333	1	0	0.333333	0.333333	1	0	0.666667	1	0.666667	0	1	0.333333	1	0.333333	0	0.666667	1	0	1	1	0.333333	0.333333	0.666667	1	0	0.333333	0	0.333333	0	0	0.333333	0.333333	0	0.333333	0	0	0.333333	1	0	0	0	1	0	0	1	0	0
744	1	1	1	0	0	0	0.666667	1	0	0.333333	1	1	0	0.333333	0.333333	0	0.333333	0.333333	0	0	1	0	0	0.666667	1	1	0	1	0.333333	0	0	0.333333	0	1	1	1	1	1	1	1	0	1	1	0.333333	0	0.666667	1	0	1
745	1	1	0	1	1	1	0.333333	1	0	1	0	1	1	0	0.333333	0.666667	0	0	0	1	1	0	1	0.333333	1	0.333333	0	0	0	0	0	1	0.666667	0.333333	0.666667	0	1	0	1	0	1	0	0	0	0	0	0	1	0.666667
746	1	0	0	0	0	1	0	1	0	0	0	1	0	1	1	0.666667	1	0.333333	1	0	0.333333	0.333333	0.333333	0.333333	0	0	0	0	0.333333	0	1	1	0	1	0	1	0	1	0.666667	0	1	0.666667	0	0	0	1	0	0	0
747	0	0.666667	0	0.333333	0	0	1	0.333333	0.333333	1	1	0.333333	0.333333	1	1	0.333333	1	0.333333	0	0	0	1	1	1	1	0	0.333333	0	0	0	0	0	1	0.333333	1	1	0	1	0	0.333333	1	0	0.666667	0.333333	0	0	0	1	1
748	0	1	0	0.666667	0.666667	0.666667	0.666667	0.333333	0.666667	1	1	1	0	1	0	0	0	0.333333	1	0	0	0	0	0.333333	0.666667	0	1	0	1	0.333333	1	0	0.333333	0.333333	1	0.333333	0	1	0	0	0.666667	0.333333	0	1	0	0.666667	0	0	0.666667
749	0.666667	0	0.333333	0	0.333333	1	0.333333	0.333333	0	0.333333	0	0	1	1	0.333333	0	0	1	0.333333	1	0.666667	1	1	0.333333	0.666667	1	0	0.666667	0.333333	0	0.666667	1	1	0	1	0.333333	0.333333	0	0.333333	0	0	1	1	1	0.666667	0.666667	1	0	0
750	1	0	0	0	0	0	1	1	0.333333	0.333333	0.666667	1	0.333333	0.333333	0	0.333333	0	0	0.333333	0.333333	0	0.333333	0	1	1	0.333333	1	0	0	0	1	1	0	1	0.333333	1	1	1	0	0	0.666667	0	1	0.666667	1	0	1	0	0
751	0	0.333333	0	0.666667	1	0	0	0	0	0.333333	0	0	0.666667	0	1	1	0.333333	0.333333	0	0.333333	0.666667	0	0.333333	0.333333	1	0	0	0.333333	0	0	0	1	0.666667	0	0	0	0.333333	0.666667	0.333333	1	0	0.333333	0	0.666667	1	1	1	0.333333	0
752	0	0	0.333333	0.333333	0	1	1	0	0	0	0	0	0	1	0	0.666667	1	0.666667	1	0.333333	0	0	0	1	0	0.666667	1	0	1	0	0	0.666667	1	1	0.333333	0	1	1	0.333333	0	1	0.333333	0	1	1	1	0	0	0
753	1	1	0	0	0	1	1	1	0.333333	0.333333	0	0.333333	0	1	0.333333	0	0	1	0	1	1	0.333333	1	0.666667	1	0	0.333333	0.666667	1	0	0	1	1	0	0.666667	0	0	1	0.333333	0	0	0.333333	0	0	0.333333	0	1	0	0.333333
754	1	0.333333	0.333333	0	0	0.333333	0.666667	0	0.666667	0	1	1	0	1	0.666667	1	1	1	1	0	0.333333	0	0.333333	0.666667	0	0.333333	0.333333	0	1	0.333333	0	0	1	0	1	0	0.666667	1	0.333333	0.333333	0	1	0.333333	1	1	0	1	0	1
755	0	0	0.666667	0.333333	0	1	1	1	0	0	0	0	0	0	0.333333	0	1	1	0.333333	0.333333	0.333333	0	0	0	0	1	0.333333	0.333333	1	0	0	1	1	0.333333	1	0.333333	0	1	0.333333	0.333333	0.333333	0.333333	0	0	0.333333	0.666667	0.666667	1	0.333333
756	0.666667	0	0.333333	0	1	0.333333	0	1	0.333333	0	0	0	1	1	0.333333	0	0.333333	0	1	0	0	1	1	0.333333	0	0.333333	0	0	0.333333	0.666667	1	0	0	0.333333	0.333333	0.333333	0	0.333333	0.333333	0.333333	1	1	0	0	0	1	0	1	0.333333
757	1	0	0	0	0	1	0.333333	0	0	0	0	0	0	0	0.333333	0	1	1	0	0	1	1	0.666667	0	1	0	0	0	0	0	0.333333	1	0.333333	1	0.333333	0	1	0.333333	0	0	0	0.333333	0	1	0.333333	1	0.333333	1	0.666667
758	1	0.333333	1	0	0	1	1	0	0.333333	0.666667	0	0	1	0	0	0.666667	0.666667	1	1	0	1	0	0	0.666667	1	1	0.333333	1	0	0	1	0.333333	1	0.333333	1	0.333333	1	0	0.333333	0.333333	0	1	0.333333	0.666667	0	0	0	1	0
759	1	0.333333	0.333333	0	1	0	0	0	0.333333	1	0	1	0.333333	1	0.333333	0	0	0.333333	0	0.333333	0	0	0.666667	1	0	1	0	0	0.333333	0	0	0	1	1	0	0	0.333333	0	0	0.333333	1	0	0	0	1	0	0.333333	0	0
760	0	0.333333	0.333333	1	0	0	0.333333	1	1	1	0.333333	1	0.333333	0	0	1	0.333333	0	0	0	0.666667	1	0	0.333333	0	0	1	0.333333	1	1	0	1	0	0.333333	0.333333	0.666667	1	1	0.333333	0	0.666667	1	1	0	1	0	0	0	0
761	0	0	1	0.333333	0.333333	0.666667	1	0	0	1	0	1	0	1	0	1	1	0.333333	1	0.333333	0	0	0	0	1	1	0	1	0	0	1	1	0.333333	1	0	0	0	0	0	0.666667	1	0	0.666667	1	1	1	0.333333	0	0
762	0.333333	0.666667	1	1	0.333333	0	0	0	0.333333	0	0	1	1	0.333333	0	0	0	1	1	0	0	1	0	0	0.666667	1	1	0.666667	0	0	0	0.333333	0	0	1	0.333333	0.666667	0.333333	0	0	0	0.333333	0.666667	1	0	1	0.666667	1	1
763	1	0.333333	0	0.333333	0.666667	1	0	1	0	1	0.333333	0	0	1	1	0	0.333333	0	0	0	0	0.666667	0.333333	0.333333	0	1	0	1	0	0.666667	1	0	1	0	0.666667	0	1	0.666667	0.666667	1	0	0	0	0.333333	0	1	1	1	0.333333
764	0	0	0.333333	1	0	0	0	0.333333	0	1	1	0	1	1	0.666667	1	0.333333	1	1	0.333333	0	0	0.333333	1	1	0	0.666667	1	0.666667	0	1	0	1	1	0.666667	0.666667	0	0	0.666667	1	0.333333	0.333333	1	0	1	1	0	0.666667	0
765	1	1	0.666667	1	0	0.666667	0	0	0	1	0	0.333333	1	0	1	1	1	1	0	0	0	0	0	0	1	0	0	0	0	0	1	0	0	0.333333	1	0.333333	1	1	1	0.333333	0.333333	0	0	0.333333	0.666667	1	0.666667	1	0
766	0	0	0.666667	0	0	0	0	0	1	0	0	0	0.666667	1	0.666667	1	0.666667	0	0.666667	1	1	0	0.333333	0	0.333333	0.666667	1	0	0.333333	0	0	0.333333	0	1	1	1	0	0.666667	0.333333	0.666667	1	0	0	0	1	0	0.333333	0.333333	0
767	0.333333	0	0	0	0.666667	0.333333	0	0	0.333333	0	0	0.333333	0	1	0.333333	0.666667	0	0.333333	1	1	0.333333	0.333333	1	0.333333	1	0.333333	0.333333	1	0	0	0.333333	1	1	0	1	1	1	1	0	1	0.666667	1	1	0.333333	0	0	0.333333	0	0
768	1	0.333333	1	1	1	0	1	1	0.333333	1	1	0.333333	1	0	0	0	0.333333	0	0	1	0.333333	1	0	0.333333	0.333333	0	0	0.333333	0	0	0.333333	0.333333	0.666667	1	0	0	0.333333	0	0	0.333333	0.333333	1	0.333333	0	0	0	0	0	0
769	0.666667	1	1	0.333333	1	0	0	1	0	0.333333	0	1	0.333333	0.333333	0	0.333333	0	0	0.666667	0.666667	0	0.333333	1	1	0.333333	0.333333	1	0	0	0	0.333333	0	0	0	0.333333	0	0.666667	0.666667	1	0	0.333333	0	1	1	1	0	0	0.666667	1
770	0	0.333333	0.333333	0	0.666667	0.666667	1	0	1	0	0.666667	0	0.666667	0.666667	0	0.666667	0	0.333333	0	0	0	0	0.666667	1	0	0	0.333333	0.333333	0	0.666667	1	0	1	0.333333	0	0	0.333333	0	0	1	1	0	0	1	0	0	0	0	1
771	1	0.666667	1	0	0	0	0.333333	1	1	0	0.333333	0	0.666667	0	1	1	0	1	1	1	1	0	0.666667	1	0.333333	0.333333	0	1	0	0.666667	0	1	0	0	0	0	0	1	0.333333	0	0.666667	1	1	1	0	0	0.333333	0	1
772	0	1	0	0.333333	0.666667	0	0	0	0	0	0.333333	1	0	0	0.666667	0	0.333333	1	0	0	0	0	0	0.333333	0	1	1	0	0	0	0.333333	0	0.333333	0.666667	0	0.333333	0	0	0	0	0.333333	0	0	0	1	0	0	1	0.333333
773	0	0	1	0	0	0	0	0	0	0.666667	0.666667	0	0.333333	0	1	0	1	1	0.333333	0	1	0	0	1	0.333333	1	0.333333	0.333333	1	0.666667	0	0	0.333333	0	1	1	0	1	0	0.333333	0.666667	1	0.333333	0	1	1	0.666667	0	0.666667
774	0.333333	0.666667	1	1	0	1	0	0	0	0.333333	0	1	0.333333	0	1	0	0.666667	0.333333	0.666667	0	0.333333	0	1	1	0.333333	1	1	0.333333	0	0.333333	0.333333	1	1	0.333333	1	0	0.333333	0.666667	1	0	0.333333	1	0	0	0	1	0	1	1
775	0.666667	0.666667	0	0	0.333333	0	0.333333	1	1	0.333333	0	0.333333	0.333333	1	1	0	1	0	1	1	0	0.333333	0	0	0.333333	0	1	0.333333	1	1	0	1	1	1	0	0	0.666667	0.666667	0	0	0.666667	0.333333	0.333333	0	0	0	0	0	1
776	0	1	1	0	0.333333	0.333333	1	0	0.666667	1	0.666667	0	0.333333	1	1	1	1	1	0.666667	0	1	0	0	0	0	0	1	0.333333	1	0.333333	0	0	0	0	0	0.333333	0.666667	1	0.333333	0	0	1	0	0.333333	0	0.333333	0	0	1
777	1	0	0	0	0.333333	0.333333	0	0.333333	0	0.333333	0	1	0	0	0	1	1	0	1	0.333333	0	0	1	0.333333	0	0	0	0	1	0	1	0	0	0	1	0	0	0	0.333333	0	0	0	1	0	0	0.666667	0	0.333333	1
778	1	0	0.333333	0	0	0	1	0.666667	0.333333	0	0.333333	0.333333	0.333333	0	0	1	0.333333	0	0	0	1	1	1	0.666667	0	1	0	0	0.666667	0	1	1	0.333333	0	0.333333	0.333333	0.333333	1	0.333333	0.333333	0	1	1	1	0.333333	0.333333	0	0.333333	0
779	0.666667	0	0	1	0.333333	0.666667	1	0	0.333333	1	0	0	0	0	0.333333	0	1	0	1	0	0.333333	0.666667	1	0.333333	0	0.333333	0	1	0	0.666667	0	1	0	0	1	0	0.333333	0	0.333333	0	0	1	0.666667	1	0	0.333333	0	0.666667	0
780	1	1	0	1	0	0	0	1	0	0	0.333333	0	0	1	0	0.333333	0	0	0	0	0	0.333333	0	1	1	1	0	0	0	0.333333	0	1	0.333333	0.333333	0	0	0	0	0.333333	0	1	0	1	0	1	1	0	0.333333	0
781	1	0.666667	0.333333	0.333333	1	1	1	0.333333	0.333333	0	0.666667	0.333333	0	1	0	0.666667	0.666667	0	0	0	0	1	0	0	0	0	0.333333	0	0	1	1	0	0.333333	0.333333	0	1	1	1	0	0.666667	1	0.666667	0	0	0.666667	0	0	1	0.666667
782	0	1	0	0.333333	0	0.333333	0.333333	0.333333	1	1	0	0	0	0	0	0	0.666667	0	0	0	0.333333	0.333333	0.333333	1	1	0	1	1	0	1	0.666667	1	0.333333	0.333333	0.333333	0	1	1	1	0	1	0	1	0	1	1	0	1	0.666667
783	0	1	0.333333	0.666667	0	0	0	0	1	1	0	1	1	0	0	0	0	0	1	0	1	1	0	0.333333	0	0	0.333333	0	1	0.333333	0	1	0	1	0	0.333333	0.666667	1	1	0.333333	0.333333	0.333333	0	0	1	1	0	1	0
784	1	1	0.333333	0	1	0.333333	0.333333	0	1	0	1	1	1	0.666667	1	0.666667	1	0	1	0.333333	0	0.333333	0	0	0	0	0.333333	0	0	0.666667	1	0	0	0	1	0	0	1	0.666667	0.666667	1	0.666667	1	1	1	1	0	0	0.333333
785	0	0.333333	1	1	0	0.666667	0	0	0.333333	0.666667	1	0	1	0	1	1	1	0	1	0.333333	0.666667	1	0	0.333333	0	1	0	0	0.333333	0	0	0	0.666667	0	0	0.333333	0	0	0.333333	1	0.666667	1	1	0	0.333333	0	0	0	0.666667
786	0	1	0.333333	1	1	0	0	1	0.333333	0	0.333333	0	0	0.333333	1	1	0	0.333333	0	0.333333	0	0	0.666667	1	1	1	0	1	0.333333	0.333333	0	1	0.333333	0	1	0.333333	0.666667	0	0.666667	0.666667	0	1	1	0	1	1	0.666667	0	0
787	0	0.333333	1	0.333333	1	0	1	1	0.333333	1	1	0	0	0	0.333333	0	0.333333	0.333333	1	1	0	0	0.333333	0	0.333333	0	0.333333	1	0	0.333333	0.666667	0	0	0.666667	0	0	0	0	1	0.666667	0	0.666667	1	1	0.333333	0.333333	1	0.333333	0.333333
788	0	0.333333	0.333333	0.666667	1	1	0	1	0	0	0	0	0	1	0	0	0	1	0.666667	1	1	1	0	0	0.333333	0	0.333333	0.333333	1	0	0	0	0.333333	1	1	1	0	1	0	0.333333	1	0.333333	0	1	0	1	0	1	0
789	0	0	0.666667	0.333333	0	0.333333	0	0	1	1	1	0.333333	0.333333	0	0.333333	1	0	0.333333	0	1	0	0.333333	1	1	0	1	0	0	0.333333	0.333333	0.666667	1	0	1	0	0	0	0.333333	0.666667	0.333333	1	1	0.333333	1	0.666667	0	0	1	1
790	1	0	0.333333	0	0.333333	0	1	1	0.333333	1	0	0	0	1	0	0.333333	1	1	0	1	0	0	0.333333	1	1	0	0.666667	0.666667	1	0	1	0	0.333333	1	0.333333	1	1	1	0.333333	0	0	0.333333	0	0	0.333333	0	0	0	1
791	0	1	0	0.333333	1	0.666667	0	0	1	1	0	1	0.666667	0	0	1	1	0.333333	1	0.333333	0	0.333333	1	1	0	0	0.333333	0	0.666667	0	0.333333	0.333333	0	0	1	0	0.333333	0	1	1	1	1	1	0.666667	1	0.666667	0.666667	1	1
792	0	0.666667	0.666667	1	0.333333	0.666667	0	0	1	0	0.333333	1	1	0	0	1	1	0	0	0	0	0.333333	0	0.333333	0	0	0	0	0.333333	0.333333	0	0.333333	1	0.333333	0.666667	1	1	1	0.666667	0	0.666667	0	0.666667	1	0.666667	0.666667	0	0.666667	1
793	1	0	0	0	0.333333	0.666667	1	1	1	1	0	1	0.666667	0.666667	0	0	0.333333	0	1	1	0	1	1	0	1	0	0	0.666667	0	1	0	0	0	0.666667	0	0.333333	0.333333	0	0.333333	1	0.333333	1	0.333333	0	0	0	0.333333	1	0
794	0	1	1	0	0	1	0	0	0	0	0	0	0.333333	0	0	0.666667	1	0	1	1	1	0	0	0	0	0	0	0.333333	1	0	0.333333	0	0	0.333333	0.333333	1	0	0.333333	0	0.666667	1	0	0.666667	0	1	0.666667	0	1	1
795	0	0.333333	1	0.333333	0.666667	0	0.333333	0	0	0	1	1	0	0	0	0	0	1	0.666667	1	1	0.333333	0	0	1	1	0	0.333333	0	1	0	1	0	0.333333	0	0	0	0.333333	1	0	0.333333	0	0.333333	0	0	0	0	1	0.333333
796	1	0.333333	1	0	0	0.333333	0.333333	0.666667	1	0	1	0.666667	0.333333	0.333333	0.333333	1	0	1	0.333333	0.333333	1	0.333333	0	0	0	0	0	0.333333	1	0	0	0.333333	1	0.666667	0.666667	0	0	0.666667	0	1	0	1	0.333333	0.666667	1	1	1	1	0
797	0.333333	0	0.333333	0	0	1	0.333333	0	0.333333	0	1	1	0	1	0	0	0	0	0	0	0	0.333333	0	0	0	0.333333	0	0.333333	0	1	0	1	1	0.333333	0.666667	1	0	0.333333	0	1	1	0	0	0	0	0	0	0	0.666667
798	0	0	0	0.333333	0	0	0	1	0	0.333333	0	0	0	0	0.333333	0	0	0.333333	0	0	0	0	1	0	0.333333	0	0	0	0	1	0.333333	0.666667	0	0.666667	1	1	0	0.666667	0	1	0.333333	0.666667	1	1	0	0.333333	0	1	0
799	0.666667	0	1	1	1	1	1	1	1	0	0	0	0.666667	1	0.333333	1	1	1	1	0	1	0	0	1	0	0.333333	0.666667	0	0.333333	0	0	1	0.333333	0	0	0	0	0	1	0	0.333333	1	0	1	0.333333	0.333333	1	1	1
800	0.333333	0	0	0	1	0.333333	0	0	0.666667	1	0.666667	0	0.333333	0	1	0	0.333333	0.333333	0	0	0	0	0.666667	0	1	0.333333	1	0	0.333333	0	1	0.333333	1	0.333333	1	0	0	0.333333	0.333333	0.333333	0	0	0	0.333333	0	1	1	0	0.333333
801	0	1	0.333333	0.333333	0	1	0	1	0.333333	0.666667	1	1	1	0	1	0.666667	0.666667	0	0	0.333333	0	0	1	1	0	0	0.333333	0.333333	0	0	0	0	1	0.333333	0	0	0.666667	1	0.666667	0.666667	0.666667	0	1	1	0	1	1	1	0
802	0	1	1	0.666667	0.666667	0.666667	0.666667	0	0.333333	1	1	1	1	1	0.666667	0.666667	0.666667	0.666667	0	0.333333	0	0	0	1	1	0.666667	0.666667	0.666667	0	0.666667	1	1	1	0	1	1	0.666667	0.666667	0.666667	1	0	0.666667	1	1	1	0.666667	1	0.666667	0.666667
803	0	0	0	0	0	0	0.333333	0.666667	0	1	0.333333	0	0.333333	0	1	0	0	1	0	0.333333	1	0	1	1	0.333333	1	0.333333	0.333333	0	0	0	1	0	0	0	0.333333	0	1	1	1	0.666667	0.666667	0.666667	1	0.666667	1	0.666667	0	0
804	1	0.333333	0	0.666667	1	0	0.333333	0.333333	0.333333	1	1	0	0	0.333333	0.333333	0.333333	0	1	1	0.333333	0.666667	0.666667	0.666667	1	0	0.333333	1	0.666667	0	0.666667	1	0	1	0.333333	0	0	0.666667	0	0.333333	0	0.666667	1	0	0.333333	0.333333	0.666667	0	0.333333	0.333333
805	0.666667	1	0.333333	1	1	0	0.333333	1	1	0.666667	0	0	1	1	0.666667	1	0	0	0.666667	1	0	1	0.333333	1	1	0.666667	0	0	1	0.666667	1	1	1	0	0.333333	1	1	1	1	1	0.666667	1	0	1	1	1	0.666667	0	0
806	0	1	0	0.666667	0	0.666667	1	0	0	0	0	0	0	1	0	0.333333	1	0	1	0	1	0.333333	0	0	1	1	0.333333	0	0.333333	0	1	1	0	0	0	0	1	0.666667	1	0.666667	0	1	0	0.666667	0	0	1	1	1
807	1	0.666667	0	0	0	0.333333	0	0.666667	1	0	0	0	0	0	0.666667	0.666667	0.333333	0	0.333333	1	0.333333	0.333333	0.333333	0.333333	0.666667	1	1	0.333333	0.333333	1	0	0	0.666667	0.666667	1	0.666667	0	0.666667	1	0.666667	0	0.666667	0.666667	0	1	0.333333	0.666667	0	0
808	0	1	0.666667	1	0	0.333333	0.333333	1	1	0.666667	0.333333	0	1	1	0.666667	0.666667	1	0.333333	0.333333	0	0	0.666667	1	1	0.333333	0.666667	1	0.666667	0.666667	0.666667	1	1	1	0	0	1	0	0	1	0	1	0.333333	1	0	1	0.666667	0.666667	0.666667	0.666667
809	0.666667	1	1	0	0.333333	0	1	1	0	0	0.666667	1	1	0.666667	1	0	0.333333	0.333333	1	0.666667	1	1	1	1	1	1	0	0	1	0	0.666667	0	0	0	0	0	1	1	1	0	1	1	0	0	0	0	0	1	0.333333
810	0.666667	1	0	1	1	0.666667	0	0.333333	0	1	0	1	0.333333	0.666667	0	1	0.333333	1	0.666667	0	1	0.333333	0.666667	0	1	0.333333	1	0.666667	1	0	0	0	0.333333	1	0.666667	0.333333	0	0	1	0	1	1	1	0	0	1	0	1	1
811	0	0	0	1	1	0.333333	0	0.333333	0.333333	0.333333	0.333333	1	0.666667	0.333333	0	0	0	0	1	0	0	0	0	0	0.666667	0	0.333333	0.333333	0	0.333333	0.333333	1	0	0.333333	1	0	0.333333	1	0	1	0.333333	1	1	0.333333	0	0	0	0	1
812	0	0	0	0	1	0.333333	1	0	0	0	0	0.333333	1	0	0	1	0.333333	1	0.333333	0.333333	1	0.666667	0.666667	0	0	0	0	0	1	0.333333	0.333333	0	0.333333	0	0	0.333333	0	0	0.333333	1	1	1	0.333333	0.333333	1	1	1	0	0
813	1	0	0.333333	0.333333	0	0.333333	0	0.333333	0.333333	0	0	0.666667	1	0	0.333333	0.333333	0.666667	0	1	0	0.333333	1	0	0	0	1	0	1	1	0.666667	0.333333	1	0.333333	0	1	0	0.666667	0	1	1	0	0	0.333333	0	0	0	1	0	1
814	0	1	0	0	0	0	0	0.333333	0	0	0	1	1	1	0	0	1	0.333333	0	0.333333	1	0.666667	1	0	0.666667	1	0.333333	1	0.666667	0.333333	0.333333	0	0.333333	0	1	1	0.666667	0.666667	1	0	0.666667	0	0.666667	1	0	0.333333	0	0	0
815	0	0	1	1	0.333333	0.666667	0.666667	1	0	0	0.666667	1	1	0.666667	0.333333	0.333333	1	0	0.666667	1	0	0.666667	1	1	1	1	0.333333	1	1	0	0.666667	0	0.333333	0	0	0.333333	0	0	0.333333	0.666667	1	0.333333	1	0.333333	1	0	0.666667	0	0
816	0.333333	0	0	0.333333	1	0	0	1	0	0	0	0.666667	0.666667	0	0.333333	0	0	0.333333	0.666667	0	0	0	0.333333	1	1	0	1	1	1	0	0.666667	0	0	0	0	1	0.333333	0.333333	0.333333	1	1	0	0.666667	0	0	0	0	0	0.666667
817	1	1	0	0.333333	0	0	1	0	0.666667	0	1	0.333333	0.333333	1	1	0	1	1	0	1	0	1	1	0.333333	0.666667	1	0	0.666667	0	0.333333	0	0	0	0	0	0.333333	0	0.666667	0.666667	0	0.333333	0.333333	0	0	1	0.333333	0.333333	0.666667	1
818	0.666667	0	0.333333	0	0	0.333333	0.333333	0.666667	0	0	0	0	0	0	0.333333	1	0	0	0.333333	0	0	0	0	0.333333	0	1	1	1	1	0	0.666667	0	0.333333	0	1	0.333333	0	0	0	1	0	0.666667	0	0	0.333333	0	0.333333	1	1
819	0.666667	1	0	0.666667	1	0	0.333333	1	0.666667	0	0	0.333333	0.333333	1	0	0.333333	0.666667	0	0	1	0	0	0	0.666667	0.666667	1	0.666667	0	0.333333	0	1	0.333333	1	0	1	1	0	1	0	0	0	0.666667	0	1	1	1	1	0	0.666667
820	0.333333	0	0	0	0	0	0	0	1	1	0	0.333333	0.333333	1	0	1	1	0.666667	0.666667	0	0	0	0	0.333333	0.333333	1	0.333333	1	0.333333	0	0	0	0	0.333333	0	0.333333	0	1	0.333333	0	0.333333	1	1	0	0	0	1	0.666667	0
821	1	1	0.333333	0	1	0	1	0	0.666667	0	0	0.333333	0.666667	0	0.666667	1	1	0.333333	0	0	0	0.333333	0	0	1	1	0	1	0	1	0.666667	1	0	1	0.333333	0	0	0	1	1	0	0.666667	0.666667	1	0	0	0.333333	1	1
822	0	1	0	1	0.333333	0	0	1	1	0	1	0	0	0	0.333333	0	0.333333	0.333333	1	0	1	0	1	0	0	0	0	0	0.333333	0	1	1	0	0	0.333333	0.333333	0	0	1	1	0	0	1	0	0.333333	0	0	0	1
[truncated: 11 more columns]

## Sheet: 方差归一化
DataPoint	1	2	3	4	5	6	7	8	9	10	11	12	13	14	15	16	17	18	19	20	21	22	23	24	25	26	27	28	29	30	31	32	33	34	35	36	37	38	39	40	41	42	43	44	45	46	47	48	49
1	0	0	0	0.556374	0.147875	1	0	1	0.147875	1	1	0	0.556374	1	0	0	0.556374	0	0	0	1	0.147875	1	1	1	1	1	1	0.556374	0.556374	1	1	0.147875	0.147875	0.147875	0.556374	0.556374	0.556374	0.556374	0.147875	0	0.556374	0.147875	0.556374	0.556374	0.556374	0.147875	0.556374	0.556374
2	0.556374	1	0	1	0	0.147875	0.556374	0.556374	0	0.556374	1	0	1	0.147875	0.556374	0.556374	0.556374	0	0.556374	0.556374	0.556374	0.556374	0	0	1	0.556374	0.556374	0.556374	0.556374	0.147875	0.556374	0.556374	0	0.556374	1	1	0.556374	0.147875	0.556374	1	0.556374	0.556374	0.556374	0.556374	0	0	1	0.556374	1
3	0.556374	0.556374	0.556374	1	0.556374	1	0.147875	0.556374	0	0.147875	0.556374	0.556374	0.556374	0	1	0.556374	1	0	0.556374	0.147875	0.556374	1	1	0.556374	0	1	1	1	0.556374	0.556374	0.556374	0.147875	0.556374	0.147875	1	1	1	0.556374	0.556374	0.556374	0	1	0.147875	0.556374	1	0	0	0.556374	1
4	0.556374	1	1	0	0	0	0.147875	1	0.556374	0	1	0	0.556374	0	0.556374	0.556374	0.556374	0.556374	0.556374	0	0.556374	0.556374	0	0	0	1	0	0.147875	0.556374	0.147875	0.147875	1	0.556374	0.556374	0.556374	0.556374	0.556374	1	0.556374	0.556374	0.556374	0.556374	0	0.556374	0	0	1	0	0.147875
5	0.556374	1	0.556374	0.556374	0.556374	0.556374	0.556374	1	0	0.147875	0.147875	0.556374	0.147875	1	0	0	1	0.147875	0.147875	1	0.147875	0.147875	1	0	0	0.556374	0.556374	0.556374	1	0.556374	0.556374	0.556374	0.556374	0.556374	1	0	0.147875	1	0	0.556374	0.556374	0.556374	0.556374	0	1	1	1	0	0
6	0.556374	0.556374	1	0.556374	1	0.147875	1	0.556374	0.147875	0.147875	1	0	0.556374	0.556374	0	0.556374	0.556374	0.556374	0.147875	1	0.556374	0	0	0	0.556374	0.556374	1	1	0.556374	0.556374	1	0.556374	0.147875	0.556374	0.556374	0	0.556374	0.556374	0.556374	1	0.556374	1	0.147875	1	0.556374	1	0.556374	0.556374	0.556374
7	0.556374	1	0.556374	1	1	0.147875	1	1	1	0	0	0	0.556374	0.556374	0.147875	0.556374	0	0.556374	1	0.556374	0.556374	0.147875	0.556374	0.556374	1	1	0.147875	0.556374	0.556374	1	0.556374	1	0	0.147875	0.556374	0	0.147875	0.556374	0.556374	1	0.556374	0.556374	1	0.556374	0.556374	0	0.556374	0	0.147875
8	1	0	1	0.556374	1	0	1	1	0.556374	0.556374	0.556374	0	0.556374	0.147875	0.556374	0.556374	0	0	0.556374	0.556374	0	0.556374	0.556374	0.556374	1	0	0.556374	1	1	0.556374	0.556374	0	0	0.556374	0	1	1	0.556374	0.556374	0.556374	0	0.556374	0.556374	0.556374	0.147875	0.556374	1	0	0.556374
9	0.556374	1	0	0	1	0	0.556374	0	0.556374	0.556374	0	0.556374	1	0.556374	0	0.556374	0	1	0.556374	1	0	0.556374	0.556374	1	1	1	0.147875	0.556374	0.556374	1	1	1	0	0.147875	0.556374	1	0	0	0	0.556374	1	0.556374	0	0	0.147875	0.556374	0.556374	0	0.147875
10	0.556374	1	0	0.147875	0.556374	0.147875	0.556374	0	0.556374	0	1	0.556374	0	0	0	0.147875	1	0.556374	1	0	0.556374	0	1	0	0.556374	0	1	1	0.556374	0.556374	0	0	0.556374	0	1	1	1	0.556374	0.556374	1	1	0.556374	0.556374	0.556374	0.147875	0.556374	0	1	0.556374
11	1	1	0.147875	0.556374	1	0.556374	0.556374	0	0	0.556374	1	1	0	0	0.556374	0.556374	1	1	1	0.556374	0	0.147875	1	0.556374	0.147875	0.556374	0	0.556374	0	0	0.556374	0	0.147875	0.556374	0	0.556374	0.556374	0.556374	0.556374	0.556374	1	0.556374	0	0.556374	0	1	1	0	0.556374
12	0	1	0	0.556374	0.556374	0	1	1	0	0.556374	1	0.556374	0.556374	0.147875	0.147875	1	0.556374	0.556374	0.556374	0	0.556374	0.556374	0.556374	0.556374	0	1	0	0.556374	1	0.556374	0.147875	1	0	0	0.556374	0	0.556374	1	0	0.556374	1	1	0.147875	0.556374	0.556374	0.556374	0.556374	0.556374	1
13	0.147875	1	0.556374	1	0.556374	0.147875	0.556374	0.556374	0.556374	0.556374	1	0.556374	1	1	0	0.147875	0.556374	0.556374	1	0	0.556374	0.556374	0.556374	0.147875	0	1	0	0	1	0	1	1	0.556374	0.556374	0.147875	0.556374	0.556374	1	0	0	0.556374	1	0.556374	0.556374	0.556374	0	0.147875	1	1
14	1	1	0.556374	0	0.556374	1	1	0	1	1	0.556374	1	1	0	0	0	0.556374	1	0.556374	0.556374	1	0.147875	0.147875	1	0	1	1	1	0	0	1	1	1	0	0.147875	0.556374	0	0.556374	0	0	0.556374	1	0.556374	1	0	1	1	0.556374	0.556374
15	0	0.556374	0.147875	0.556374	0.556374	0	1	0	0	0.147875	0.556374	0.556374	1	0.147875	1	0	0.556374	1	0	1	1	0.147875	1	0	0.556374	1	0	0	0.147875	1	1	1	0.556374	0	0.147875	1	0.147875	0.556374	0.556374	0.556374	0.147875	0.147875	0.147875	0.147875	0.556374	0.556374	0.556374	0.556374	0
16	0.556374	0	1	0	0	1	0.147875	0.556374	0.556374	0	0	0.556374	0	1	0.556374	0	0	1	0.556374	0.556374	0.556374	0.556374	0.147875	1	0	0	0.556374	1	1	0.556374	0	0.556374	0.556374	0.556374	0	0.147875	0.556374	1	1	0	0.147875	0.556374	0.556374	0.147875	1	0	1	0.556374	1
17	0.556374	0.147875	1	0.556374	0	0.556374	0.147875	0.147875	1	1	1	1	0.147875	0.147875	0	0.556374	0.556374	0.556374	0	1	0.556374	0	1	1	0	0.147875	1	0.556374	0.147875	0.556374	0	0.147875	1	0.147875	0.147875	0.556374	0.556374	0.147875	0.556374	0.147875	0	0.556374	0.147875	0.556374	0.556374	0.147875	0.556374	0.556374	1
18	0.147875	1	0.556374	1	0	0	0	0.147875	1	0	0.556374	0.556374	0.556374	1	0.556374	0	0.147875	1	0.556374	0.556374	0.556374	1	0	0	0.147875	1	0.556374	0.556374	0	1	0.556374	0.556374	1	0.556374	0	0.147875	0.556374	0.556374	0	0	1	1	0	0.556374	0	0.556374	0.556374	0	0.147875
19	0.556374	0.147875	1	0.556374	0.556374	0.556374	0.556374	0.147875	0.556374	0.556374	0.556374	0.556374	0	1	0	1	0.556374	1	0.556374	1	0	0.556374	0.556374	0.556374	0	0	0.147875	1	1	1	0	0.556374	0.556374	0	0.556374	0.556374	0.556374	0	0.556374	1	0	0	1	0	0	0	0.147875	1	0.556374
20	0	0.147875	0.556374	0	1	0.556374	0.556374	0.556374	0	0.147875	0.147875	0.147875	0	0.556374	0	0.556374	0.556374	1	0.556374	1	0	0.147875	0.556374	0.556374	0	0	1	1	1	1	0.147875	0.556374	1	0	0.556374	0.556374	0	0.556374	1	1	0.556374	1	0.556374	1	0	1	1	0.556374	1
21	0	0.556374	0.556374	0	0.147875	1	1	0.147875	0	0	0	0.556374	0	1	1	0	0.147875	1	0	0.556374	0.147875	0.147875	0.147875	0.147875	0.556374	1	1	0.556374	1	0	0	0.556374	0.556374	0	0.147875	1	0.556374	1	0.556374	1	1	0	0	0	0.556374	0.556374	0.147875	0.556374	1
22	0	0.556374	0.556374	0.556374	0.556374	1	0.556374	0.556374	0	0.147875	1	1	0.147875	1	1	1	1	0.556374	1	0	0.147875	0	0	0.556374	0.556374	0.556374	0.147875	0.147875	0.147875	0.556374	0.556374	0.147875	1	0.556374	0	0.556374	0.556374	0.147875	0	0.556374	0	1	0	0	0.556374	0.556374	0.147875	0	1
23	0.147875	0.556374	1	0.556374	0.556374	1	0.556374	0	0.556374	0	0.556374	0.147875	0.556374	0	0.556374	0	0.556374	1	1	1	0.556374	1	0.556374	1	0.556374	0.556374	0.556374	0.556374	0.147875	0.556374	1	1	1	0.556374	0.556374	0.556374	0	1	0.556374	1	0.147875	1	1	0.147875	1	1	1	0.556374	0
24	0.556374	0.147875	0.556374	1	0.147875	0.556374	0.556374	0.556374	0.556374	0	0.556374	1	0.556374	0.556374	1	0.556374	1	1	0	0.556374	0.556374	0.556374	1	0	0.147875	1	0.556374	0.556374	0.556374	0.556374	0.556374	0	0.556374	0.556374	0.556374	0	1	0.556374	0.147875	0.147875	0.556374	1	0	0.556374	0.556374	0	0	1	1
25	0.147875	0	1	0	1	1	0.556374	0	0.556374	0	1	1	0.147875	1	1	0	0	0.556374	0	0.556374	0.556374	1	1	1	0.147875	0.147875	0.556374	0.556374	0.556374	0.556374	0	0	1	0	0.556374	0.556374	0.556374	0	1	0	0.556374	1	1	0.147875	1	1	1	0.556374	0.556374
26	0	0.147875	1	0	1	1	0	0.556374	0.556374	0.556374	0.147875	0.556374	0.556374	0	0.147875	0.556374	0.147875	0.556374	0.556374	1	0.556374	0.556374	0	0.556374	0	0.556374	0.556374	0	1	0	0.556374	0.556374	1	0.556374	1	0.556374	1	0.147875	1	0.556374	0.556374	1	0	0.556374	0.147875	1	0.556374	1	0.556374
27	0	0	1	0	0.147875	0.556374	0	0.556374	1	0.556374	1	0.556374	0	0.147875	0.556374	0.556374	0	0.556374	1	0.556374	1	0	0	1	0	0.556374	0.147875	0	0.556374	1	0	0.556374	0.556374	0.556374	0.147875	1	0.556374	1	0.556374	0.556374	1	0.556374	0	0.147875	1	0.147875	0.147875	0.556374	0.147875
28	0.556374	0.556374	0.556374	0	1	0	1	1	1	0	0.556374	1	1	1	0.556374	1	1	0.556374	0.556374	0.147875	1	1	0.556374	1	1	0.147875	1	0.556374	0.556374	0.556374	0.556374	0.556374	0.556374	0	0.556374	0.147875	0.556374	0.147875	0.556374	0.556374	1	0	0	0.556374	0.556374	0.556374	0.147875	1	0
29	1	1	0.556374	0.556374	0	0.556374	0	0.147875	0.556374	0	1	1	0	0.556374	1	0.556374	0.556374	0.556374	1	1	1	0.556374	0.556374	0.556374	0.556374	0	0.147875	0.556374	1	0	1	0.556374	1	0.147875	0.556374	1	0.147875	0.556374	0.556374	0.556374	1	0.147875	0.556374	0.556374	0.147875	0.556374	0	0.556374	0
30	0.556374	0.147875	0	0	0.556374	1	0	0.556374	1	0	0.556374	1	0	0	1	1	1	0	0	0	1	0	0.147875	0.556374	0	0	1	0	1	1	0.556374	0.147875	0.556374	0	0.556374	0.147875	0.556374	0	0.556374	1	1	0.556374	0.556374	0.556374	0.556374	0	0.556374	0	0
31	0	0.556374	0.556374	0.556374	0	0.556374	0.147875	1	0.147875	0.556374	0.556374	0.556374	1	0.556374	1	0	0.556374	0.556374	0.556374	1	1	0	1	0.556374	0.147875	0.147875	1	0.556374	1	1	0.147875	0.556374	0.556374	0.556374	0.556374	1	0	0	1	1	0.147875	1	0.556374	0	1	0	0.147875	1	0.556374
32	0.556374	0.556374	0.556374	1	0.556374	0.147875	1	0.556374	1	0.556374	0.556374	1	0.556374	0.556374	0.556374	0	0.147875	1	1	0.147875	1	0	0.556374	0.556374	0.556374	1	0	1	0	0	0	0.556374	1	0.556374	0.556374	0.147875	0.556374	1	0	0.556374	0	0	0	0.556374	0	0	0.556374	0.556374	1
33	1	1	0.556374	0.556374	0	1	0	0	0.147875	1	1	0.147875	0.556374	1	0.556374	0.147875	0.556374	0.556374	0.556374	0.556374	1	0.556374	0.556374	0.556374	0	0.556374	0.556374	0	0.147875	1	0.556374	1	0.556374	0.556374	1	0.556374	0.147875	0.556374	0	0.147875	1	1	0.147875	0.147875	1	0.556374	0.556374	1	0
34	0.556374	1	1	0.556374	0.556374	0	0.147875	0.556374	0.556374	0.147875	1	0.556374	1	0.147875	0.556374	0.556374	0.556374	1	0.556374	0	0.556374	0.556374	0.556374	0.556374	1	0.556374	1	0.556374	0.147875	0.556374	0	1	0.556374	0	0.556374	1	1	0.147875	0.556374	0.556374	0.556374	0.556374	0	0	0	0.556374	0.556374	0.556374	0.556374
35	0.556374	0	1	0.556374	0.556374	0.556374	0.556374	0.556374	0	0	0.556374	0.556374	0.556374	1	0	0.556374	0.556374	0.556374	0.556374	0.556374	0.556374	0.556374	0	0.556374	0.556374	1	1	0	0	0.556374	0	0.556374	0.556374	1	0.147875	0.556374	0.147875	0.147875	0.147875	0	0.556374	1	0.556374	0	0.556374	0	0.147875	1	0
36	1	0.556374	1	1	0.147875	0	1	1	1	0	0.147875	0.556374	0	0.556374	0.556374	0.556374	0.556374	1	0.556374	0.556374	0.147875	0.556374	0.556374	1	0.556374	0.147875	1	0	0.556374	1	1	1	0.556374	1	0.147875	1	1	1	0.556374	0.147875	1	0	0.556374	0.556374	0.556374	0	0	0	0
37	0	0	0.556374	1	0.556374	0.556374	1	0.556374	1	0.147875	1	1	0.556374	1	0	1	0.556374	0.556374	0.556374	0.556374	0.556374	0.556374	0	0.147875	1	0.556374	1	1	1	0.556374	0.556374	0.556374	0.556374	0	0.556374	0.147875	0.147875	1	0.556374	0.147875	1	0	0	0.556374	0	0.556374	0.556374	0.556374	1
38	0.147875	1	0.556374	0	1	0	0	0.556374	0.556374	0.556374	1	0.556374	1	0.556374	0	0	0.147875	0	1	0.556374	1	0.556374	1	0.556374	0.556374	0.556374	1	1	0.556374	0	0.556374	1	0	0.556374	1	1	0.147875	1	0.556374	0	0.556374	0	1	1	0	0.556374	1	1	0.556374
39	0	0.556374	0	0.556374	0.556374	1	1	0	1	0.556374	1	0.147875	0.556374	0.556374	0.556374	0.556374	0.147875	0.556374	0.556374	0.556374	0.556374	0.556374	1	0	0.147875	1	0.556374	0.556374	1	1	0.556374	1	0.556374	0.556374	0.556374	1	1	0.556374	0	0	1	1	0.147875	1	0.556374	0	1	1	1
40	1	1	0	1	0.147875	0.556374	0.556374	1	1	0.147875	0.556374	0.556374	0.147875	0.556374	0.556374	0.147875	1	0	0	1	1	1	1	0.556374	1	0	0	0	1	0	1	0.556374	0.147875	0.147875	1	0.147875	0.556374	1	1	1	1	0.147875	0.556374	0.556374	0.556374	1	0.556374	0	0.556374
41	0.147875	1	0.147875	0.556374	0.556374	1	0.556374	1	0.556374	1	0.556374	1	1	0.556374	0	0.556374	1	0	0.556374	0.556374	1	1	1	0	1	1	1	1	0.556374	0	0.556374	1	0.556374	0.556374	0.147875	0.556374	0.147875	0.556374	1	0.147875	1	0.556374	0.556374	0.556374	0.556374	1	0	1	1
42	0.147875	0.556374	0	0.556374	1	0.556374	0	1	1	1	0.556374	0.556374	0.556374	0	0.147875	0.556374	0.556374	0	0	1	0	0.556374	1	1	0	1	1	0.556374	1	0.556374	1	1	1	0	0	0.556374	1	0.556374	0.556374	0.147875	1	0.556374	0	0.556374	0	0.556374	0.556374	0	0.556374
43	0.147875	1	1	1	0.556374	1	0.556374	1	0.147875	0.147875	1	0	0.556374	1	0.556374	0.556374	0.556374	0.556374	0.556374	0.556374	0	1	1	0.556374	0	0.556374	1	1	0.556374	0.556374	1	0.556374	1	0.556374	1	0.556374	0.556374	0.147875	1	1	0.147875	0.556374	1	0.556374	1	0.147875	0.556374	0.147875	0.147875
44	0.556374	0.556374	0	0.556374	0.556374	0.556374	1	0.556374	0.556374	1	0.556374	1	1	0.556374	0	0.556374	0.147875	0.147875	0.147875	1	0.556374	0.147875	0	0.556374	0.147875	0.556374	0.556374	0.556374	0.556374	0	0.556374	0	0.147875	0.147875	1	0.556374	1	0.556374	0	0.147875	1	1	0.556374	1	0.556374	1	0.556374	1	1
45	0.556374	1	0	0.556374	0.556374	1	0	0	0.556374	0.147875	1	0	0.556374	0.147875	1	1	0.556374	0	0.556374	0.556374	0	0.556374	0.556374	0.556374	0.556374	1	0.556374	0.556374	0	0.556374	0	0.556374	0.556374	0	0	0	0.147875	1	0.556374	0.556374	0	0	1	0.556374	0.556374	0.556374	0.556374	0.147875	0.556374
46	0.147875	1	0	0.556374	0.556374	0.556374	0	1	0.556374	0	0.556374	0.556374	1	1	0.556374	1	1	0	0.556374	0	0	1	1	0	0.556374	0.556374	0	0	0	0	0.556374	1	0.556374	0.556374	0	0.556374	1	0.556374	0	0.556374	0.556374	0	0	1	1	1	0.556374	0	0.556374
47	0.147875	1	0.147875	0.147875	1	0.556374	0.556374	1	0	1	0.556374	1	0	0	0	0	0.147875	1	1	1	0.556374	1	0.556374	0.147875	0.147875	0.556374	0.556374	1	0.556374	0.556374	1	0.556374	0.147875	0.556374	1	1	1	1	0.556374	0.556374	0.556374	0.556374	0.556374	1	0	0.556374	0.556374	0	0.147875
48	1	0	0.556374	0.556374	0.556374	1	0.556374	1	0	0	1	0.147875	0.556374	0.556374	0.556374	0	1	0	0.556374	1	0.556374	1	0.556374	0	0.556374	0.556374	0.147875	0.147875	0.556374	0.556374	1	0.556374	0	0.556374	0.556374	0.147875	0.147875	1	0.147875	1	1	1	1	0.556374	0.556374	0.556374	0.556374	0	0.147875
49	1	1	0.556374	1	0	1	1	0.556374	0.147875	0.556374	1	0	0.147875	0	1	1	0.556374	0.556374	0.556374	0.556374	0	0	1	0.556374	0	0.147875	0.556374	0.556374	0.556374	0.556374	1	0	0.147875	0.556374	0.147875	1	0.147875	1	0.556374	0.147875	1	0.147875	0.147875	0.556374	0.556374	0.556374	0.556374	0.147875	1
50	1	0.556374	0.556374	0.147875	1	0	0.556374	1	0	1	1	0	0.147875	0.556374	0.556374	0	1	1	1	0.147875	1	1	0.556374	0	0.147875	0.556374	0.147875	0.556374	0.147875	0.556374	0.556374	0.147875	1	1	1	0	0	1	0	1	1	0	0.556374	0.556374	0	0.556374	0.147875	0.147875	0.147875
51	0.147875	0.556374	0.556374	0.556374	0.556374	0	0.556374	0	0	0	1	0	0	0.556374	0.556374	0.556374	0	0.556374	1	0.556374	0.556374	0.556374	1	0.147875	1	1	0	0.556374	1	0	0	0.556374	0.147875	0.556374	1	0	0.556374	0.556374	0.556374	1	0.556374	0.147875	1	0.556374	1	1	0.147875	1	1
52	0.556374	0.556374	0	0.556374	0.556374	0	0.147875	1	0	0.556374	0	1	1	1	0	1	0.556374	0	0.556374	0.556374	0	1	0.556374	0.556374	0.556374	0.556374	1	0.147875	0.556374	0	0.147875	1	0.556374	1	0.556374	0	0	1	0	0.556374	1	0	0.147875	1	0.556374	0.556374	0	0	0.556374
53	1	1	0.147875	1	1	1	1	1	1	0.556374	1	1	0	0.147875	0.556374	1	0.556374	0	1	0.556374	0	0.556374	1	0	1	0.556374	1	0.147875	1	0	0.556374	0.556374	0.556374	0.147875	0.556374	0.147875	0.147875	0.147875	0	0.556374	0	1	1	1	0.556374	1	0.556374	1	1
54	0.147875	0.556374	0.147875	0.147875	1	0.556374	0	1	0	0.147875	1	1	1	0.556374	0	0.147875	1	1	0.147875	1	0	1	0.556374	0.556374	0.556374	0.556374	0	0.556374	0.556374	0.147875	0.556374	0.556374	0.556374	1	0	0.147875	0.147875	1	0.556374	1	1	0.556374	1	0	0	1	0.556374	0.556374	0.556374
55	0	0.556374	0.556374	0.556374	0.556374	0.556374	0	0.556374	0	0.556374	0.556374	0.147875	0.556374	0.556374	1	1	1	0.556374	0.147875	0.556374	0.556374	0.556374	1	0.556374	0	0.147875	1	0	0	0.147875	0.556374	0.556374	1	1	0.556374	0.147875	1	1	0	0.147875	0.556374	0.556374	0	0.556374	0.556374	1	0	0	1
56	0	1	1	0.147875	1	0.556374	0.556374	1	1	0.147875	1	0.556374	0	1	0	0	1	0.556374	1	0	0.556374	0.556374	0.556374	1	0.556374	1	1	0.147875	0.556374	1	0.147875	1	1	0.556374	1	0	0.556374	1	0	1	0	0.556374	0.147875	1	0.556374	1	0.556374	0	0
57	1	0.556374	0.556374	0.556374	1	0.147875	0.147875	0	0.147875	0	1	0	0.556374	1	0	0.556374	1	0.556374	0.556374	0.556374	0	0.556374	0.556374	1	1	0.556374	0	0.147875	1	0	0.556374	0.556374	0.556374	0.147875	0.556374	0.147875	1	0.556374	0	0.556374	0.556374	0.556374	0.556374	0	0	1	0.556374	1	0
58	0.556374	1	0.556374	0.556374	0.556374	0	0.147875	1	1	1	0.556374	0	0.556374	0.556374	0	0	1	0	0	0.556374	1	1	1	0.556374	1	1	0.556374	0	0.147875	0	0.556374	0.556374	0	0.556374	0.556374	1	0.147875	0.556374	0.556374	0.147875	0.556374	0	1	0.556374	0.556374	0.556374	0.147875	1	1
59	0.556374	1	0.556374	1	0.556374	0	0.556374	1	0.556374	0.147875	0.556374	0.556374	1	0	0.556374	0	0.147875	0.556374	0.556374	1	1	0.556374	1	0.556374	1	0.556374	0.556374	0	1	0	0.556374	1	0	0.556374	0.147875	0.147875	0.147875	1	0	0.556374	0.556374	0.556374	1	0.556374	0	1	1	0	0
60	0.556374	0	0.556374	1	0.556374	0.556374	1	0.556374	0.556374	0.556374	0.556374	0.556374	0.147875	1	0.556374	0.556374	0.556374	0.556374	1	0	1	1	0.556374	0.556374	0.556374	0.556374	1	0.556374	0.147875	0.556374	0	0.556374	1	1	0.556374	0	0.556374	1	0	0.556374	1	1	0.147875	1	0.147875	0.556374	0.556374	0	0
61	0.556374	0	1	0.147875	0.556374	0.556374	0.556374	1	0	0.556374	0.556374	0.556374	1	1	0	0.556374	0.147875	0.556374	0.556374	0	0	0.556374	0.556374	0.556374	1	0.556374	0	0.556374	1	0.556374	0.556374	0.556374	0.556374	1	0.556374	0.556374	0.556374	0	0	0.556374	1	0.556374	0.556374	1	0.556374	0.556374	1	0	0.556374
62	0.556374	0	1	0.556374	0.147875	1	1	1	0	0	0.556374	0.556374	1	1	0.556374	0.556374	1	0.556374	0.556374	0.147875	1	0	1	1	0	0.147875	0.556374	0	0	0	0	0.556374	0	1	0.556374	0.147875	0.556374	0.556374	0	0.556374	0.556374	0.556374	1	0	0	0	0.147875	0.556374	1
63	0.556374	0.556374	0.556374	0.556374	0.556374	0.556374	1	1	1	0.556374	1	0.556374	0	0.556374	1	1	1	0.556374	0.556374	0	0.556374	0.147875	1	0.147875	0.556374	0.556374	0	0.147875	0.556374	0.556374	0	0.556374	1	0	0.556374	1	0	0.556374	0.556374	0.556374	1	0.556374	0.556374	0	0.556374	0.556374	0.147875	0.556374	0.556374
64	0.556374	1	0.556374	0.556374	0.147875	0.556374	0.556374	0	0.556374	0.556374	0.556374	1	0.556374	1	1	0.556374	0.147875	0.556374	0.556374	0.556374	0.556374	0	0.556374	0.556374	0.556374	1	0.556374	0.556374	0	0.556374	0.556374	0.556374	0.556374	0	0	0.556374	0.556374	0.556374	1	0.147875	1	1	1	0.147875	0.556374	0	0.556374	0.147875	1
65	0.556374	0	0	1	1	0.556374	0.556374	0.556374	0.556374	0.147875	0.556374	0	0.556374	1	0.556374	0.147875	1	0.556374	0.556374	0.556374	0.556374	0.147875	0.556374	0.556374	1	1	0.556374	0.556374	0.147875	0.556374	0.147875	0.556374	0.556374	0	0.556374	0.556374	0.556374	1	0.556374	0.556374	0.556374	0.556374	0.556374	1	0.556374	1	1	0.556374	0.556374
66	0	1	0.556374	1	1	1	0.556374	0.556374	1	1	1	1	0	0.556374	1	0	0.556374	0.556374	1	0.556374	0.147875	1	1	0.556374	0.556374	0.556374	1	0.556374	0.556374	0.556374	0.556374	0.556374	1	0	1	1	0	0.556374	0.556374	0.556374	0.147875	0.556374	0	0.147875	1	0.556374	0.147875	1	0.556374
67	0.556374	0.556374	1	0.556374	1	1	1	1	0.556374	0.556374	1	1	0.556374	0.556374	1	0	0.147875	0.556374	0	1	1	0	0.556374	0	0.556374	0.147875	0.556374	0	0.147875	1	0.147875	0.556374	0.556374	0.556374	1	0.556374	0.556374	0.147875	1	0.556374	0.556374	0.556374	0	1	0.556374	0.556374	0.147875	1	0.556374
68	0.147875	0.556374	0.556374	0.556374	0.556374	0.556374	0	0.147875	1	1	1	0.147875	1	0.556374	1	0	0.556374	1	0.556374	1	1	0.556374	0.556374	1	0.556374	1	0.556374	0.556374	0	0.556374	0.556374	0.147875	1	0	1	0.556374	0	0.556374	0.556374	0	0.147875	1	1	0.556374	1	1	0.556374	1	0.556374
69	0	0.556374	1	0	0	1	1	1	0.556374	1	1	1	1	1	0.556374	1	0.147875	1	0	0.556374	1	0.556374	0	0.556374	0.556374	1	1	1	0	0	1	0.147875	1	0.556374	0.556374	0	1	0	1	0.556374	0.556374	0	0.556374	0.556374	0	1	0.556374	0.147875	0.556374
70	0.556374	0.556374	0.556374	0	1	1	0.556374	1	0.556374	1	1	0.556374	0.147875	0.556374	0.556374	0.556374	0.147875	0.556374	0	0.147875	0.556374	0	1	0.556374	0.556374	0.147875	0.556374	0	0.556374	0.556374	0	0	1	0.147875	0.556374	0.556374	0	0.556374	0.147875	1	0	1	0	1	1	0.556374	0.556374	0.556374	0.556374
71	0.147875	1	0.556374	0	0.556374	0.147875	0.556374	0.556374	0.556374	1	0.556374	0.147875	0	1	1	1	1	0.556374	0.556374	0.556374	0.556374	0	0	1	0.556374	0.556374	0	0.556374	0.556374	0.556374	0.556374	0.147875	1	1	1	0.556374	0	1	1	0	0.556374	0.147875	0	0.556374	0.556374	1	0.556374	1	0.147875
72	0.556374	0.556374	0.556374	0.556374	0	0.556374	0.556374	1	0.556374	0	0	0.556374	0.556374	0.556374	1	0.556374	0	0.556374	0	1	0.556374	0.147875	0.147875	1	0.147875	0.556374	0.556374	0.556374	0.556374	1	0.556374	1	0.556374	0.556374	0	1	1	0.556374	1	0	0.556374	0.556374	0	0.147875	1	1	1	0.556374	0.556374
73	0.556374	0.147875	1	0	0.556374	0.556374	0.556374	1	0	0.556374	0.147875	0.556374	1	0.147875	0.556374	0	0.147875	1	1	0.556374	1	0	0	1	0	0.556374	1	0	0	0	0	1	0.147875	1	1	0.556374	0	0.147875	1	1	0.147875	1	0	0.147875	0.556374	0.556374	1	0	0.556374
74	0.556374	0.147875	0.147875	0.556374	1	0.556374	0	0	1	0.556374	1	1	0.147875	0.556374	0	1	1	1	0.556374	1	0	1	1	0	1	0.147875	0.147875	0.556374	1	0	0	0.147875	0.556374	0.147875	0.556374	1	0.147875	0.147875	1	0.147875	0.556374	1	0.556374	0.147875	0.556374	0	0.556374	1	0.556374
75	0.556374	1	0.556374	1	0	1	0	0	0.556374	0	0.556374	0	0	0.556374	1	0.556374	0.556374	1	1	1	1	0	0	1	1	1	0	0	0	1	0.556374	0.556374	0.556374	0	0	1	0	1	1	1	0.556374	1	0.147875	0.147875	1	0.556374	1	0.556374	0.556374
76	0	0.147875	0.556374	1	0.556374	1	0.147875	0.147875	0.556374	1	1	0.147875	0.147875	0.556374	0.147875	0.147875	0.147875	1	0.147875	0.556374	1	1	0	1	1	1	0	1	0	1	0.556374	1	1	0.556374	1	0	0.147875	1	1	0.556374	0.147875	1	0	1	0.556374	0	1	1	0.147875
77	0.556374	1	0.556374	1	1	0.556374	0	1	1	0	0	0.556374	0.556374	0	0	1	1	0	0.556374	0.556374	0.556374	0.556374	0.556374	1	1	0	0	0.556374	1	1	0.556374	0.556374	0.556374	0.556374	0.556374	1	0.147875	0.147875	1	0.556374	1	0	0.556374	0.556374	1	0	0.556374	1	0.556374
78	0.556374	1	0	1	0	0	1	0.556374	1	0.147875	0.556374	0.556374	0	0.556374	0	0	1	0	1	0.556374	1	0	0	0.556374	0.556374	0.556374	1	1	1	0	0.556374	0.556374	1	1	1	1	1	0.556374	0.556374	0.556374	1	1	0	0.556374	0.556374	0.556374	0	0	1
79	0	0.556374	0.556374	1	0	1	0.556374	0.556374	1	0.556374	0.556374	0.147875	1	0	0	0.556374	0	0.556374	0.556374	0.556374	1	0	0	0.556374	0.147875	1	0.147875	0.556374	0.556374	1	0	0.556374	0.556374	1	0	0.147875	0	1	1	0.556374	0.556374	1	0.556374	1	0.147875	1	0.556374	0	1
80	1	0	0.556374	1	0.556374	1	1	0.147875	0.147875	1	1	1	0.556374	0	0.147875	1	0.556374	0.556374	0.556374	0	0.556374	1	0.556374	1	0.556374	0	0.556374	0.147875	0.556374	1	0.556374	0	0.556374	0.556374	0	0.147875	1	1	1	0.556374	0.556374	0.556374	0.556374	1	0.147875	1	0.556374	1	0.556374
81	1	0.147875	1	1	0	0.556374	0	0	1	0.556374	0	1	1	0	1	1	0	0.556374	0	0.556374	1	0.556374	0.147875	0.147875	0.556374	0	0.147875	1	0.556374	0.147875	0.556374	0.556374	0.556374	0.556374	1	0.147875	1	0.556374	0.556374	0.556374	0.556374	0	0	0	0	0.556374	1	0	0
82	1	0.556374	0.556374	0.556374	0.556374	0	0.147875	1	1	0	0.556374	0.556374	0.556374	0	0.556374	1	0.556374	1	1	0	1	0.556374	0	0.556374	1	1	0.556374	0.147875	0.556374	0.147875	1	0.556374	0.556374	1	0	0.556374	0.556374	0.556374	0.556374	1	0.556374	0.147875	1	0.147875	1	1	0.556374	0.556374	1
83	0.556374	0.147875	0.556374	1	0.147875	0.556374	0.556374	0.556374	0.556374	0.556374	0	0.147875	1	0	0.556374	0.556374	0.556374	0.556374	1	0.556374	1	0.556374	1	0.147875	0.556374	0.556374	0.147875	1	0	0.556374	0.556374	1	1	1	0	0.147875	0.556374	0.147875	0.147875	0.556374	0.147875	0.147875	1	0	1	0.556374	0.556374	0.147875	0
84	1	0	0.147875	0.556374	0	0.556374	0.556374	0.556374	1	0	0.556374	0.556374	0.556374	0	0	0	0	0.556374	1	0.556374	0.556374	0.556374	0	0.147875	1	1	0.556374	1	1	1	0.147875	0.556374	0	0.556374	0	0	0.556374	0.147875	1	0	0.556374	1	1	0	0.556374	1	0	0.147875	1
85	0.147875	1	1	0	0.556374	0.556374	0.556374	0.556374	0	0.556374	1	0	0	0.556374	1	1	0.556374	0	0.556374	0.556374	0.147875	1	0.556374	0.556374	0.556374	0.556374	0	0	0.556374	1	0.556374	0.556374	0.556374	0.556374	0	0.556374	0.556374	0	1	1	0.556374	0	1	0.556374	1	0.556374	1	1	1
86	0.556374	0.147875	1	1	0.556374	0.556374	0.556374	0.556374	0.556374	0	0.556374	0	1	0	0.147875	1	0.556374	0.556374	0.556374	0	0	0.147875	0	0.556374	0.556374	0.556374	1	0	0.556374	0.556374	1	0	1	1	0.556374	1	0.556374	0	0	0.556374	1	0.556374	1	0	0.556374	0	0.147875	0.147875	0.556374
87	1	1	0	0	0.556374	0.147875	1	0.147875	0.147875	1	0.147875	1	0.556374	0.147875	0.556374	1	0.556374	0	0.556374	0.147875	0.147875	0.556374	0	0	1	0.556374	1	0	0.147875	0.147875	0.556374	0.556374	0.147875	0.556374	0.556374	0	1	0.556374	1	1	0	1	0.556374	0	0	1	0.556374	1	0
88	1	0.556374	0.556374	1	0	0	0.147875	0	0.556374	0.556374	0.147875	0.556374	0	1	1	0.556374	0	0.556374	1	0	0	0.556374	0.556374	0.147875	1	1	1	1	0	0.556374	0.556374	0	0.147875	1	1	1	0.556374	0.556374	0	0.556374	0.556374	1	0.556374	0	0.556374	1	1	1	0.556374
89	0.556374	0.556374	0.556374	0.556374	0	0.147875	1	0.556374	0.556374	0	1	1	1	1	0.147875	1	0.556374	1	1	0.556374	0.556374	1	0	0.556374	1	0.556374	0.556374	1	0.556374	0.556374	1	1	0.147875	0.556374	1	0.556374	1	0.147875	1	0.147875	1	0.556374	1	0.556374	1	0.556374	0.147875	0.556374	0.556374
90	1	0	0.556374	1	0.556374	0.556374	0.147875	0.556374	0.556374	1	0.556374	0.147875	1	0	1	0.147875	0.556374	1	0.556374	1	0.556374	1	0	0.556374	0	1	1	0	0	0.556374	0	0.147875	0.556374	0.556374	0.556374	0.556374	1	0	0	0.556374	1	1	0.556374	1	0	0.147875	0.556374	0.556374	0
91	0.556374	0.147875	0.147875	0.556374	1	1	1	0.556374	0.147875	1	0.556374	1	0.556374	0	1	1	0	0.556374	0.556374	0.556374	0.556374	1	0.556374	0.556374	0.556374	0.556374	1	0.556374	0.556374	0.556374	1	0.147875	1	0.556374	0	0	1	0	0.556374	0.556374	0	0.556374	0.556374	0.556374	1	1	0	0.556374	0.556374
92	0.556374	0.556374	1	0.556374	0.556374	0	0.147875	1	0.556374	1	0	0.556374	0.556374	0	0.147875	1	0.556374	0.556374	0.556374	0	0	0.556374	0	0.556374	0.556374	0.556374	1	0	0.556374	0.556374	0.556374	0	0	0.556374	0	0.556374	0	0	0.556374	0.556374	0.556374	0.556374	0.147875	0.556374	0.556374	0.556374	1	1	0
93	0	1	1	0.556374	0.556374	1	0.556374	0.556374	0.556374	0.556374	0.556374	0.556374	1	0	1	0.147875	0.556374	0.556374	0.556374	0	0	0.556374	1	1	0.556374	0.147875	1	0	0.147875	0.556374	0.556374	0.556374	0.147875	1	0	0	1	0	0.556374	0.556374	0.556374	1	0.556374	1	0.147875	0.556374	1	0.556374	1
94	0.556374	0.147875	0.556374	0.556374	0	0	0.556374	0.556374	1	0.556374	0	0	0.147875	1	1	0.556374	0.556374	0.147875	1	0.556374	0.556374	0	0	0.556374	0.556374	0.556374	1	1	0	1	0	0.556374	0.147875	0.556374	0	0	0.556374	0	0.556374	0	0.556374	1	0	0	0.556374	0.556374	0	0.556374	1
95	0.556374	1	1	0.556374	0.556374	0.556374	0.556374	0	0.147875	0.556374	0	0.556374	0.556374	0.556374	0.556374	0.556374	0	0.556374	0.556374	1	1	0.556374	0.556374	0	0.556374	0	0.556374	0.556374	0	1	0	0.556374	0.556374	0.556374	0.556374	0.556374	0.556374	0	1	0.556374	0.147875	1	1	0	0	0.556374	0.556374	1	0.556374
96	0	0	0.556374	0.147875	0.556374	0.147875	0.556374	0	1	1	0	0.556374	0.556374	0	1	0	0	0.147875	0.556374	0.556374	0.556374	0.556374	0.556374	0.556374	0	0	0.147875	1	1	0.147875	0.556374	0.556374	0.556374	0.556374	0	0.147875	1	1	1	0.556374	0	0.556374	0.556374	0.556374	0.556374	1	0	0.556374	0
97	1	1	0	0	0.556374	0.556374	0.147875	1	0	1	0.556374	1	0.556374	0	1	1	0.556374	0.556374	1	0.556374	0.556374	0.556374	0	1	0.556374	0.556374	1	1	0.556374	0.556374	0.556374	0	0.556374	1	0.556374	0.556374	0.556374	0	1	0	1	0.147875	0.556374	0	0	1	0	0.556374	0.556374
98	0.556374	1	1	0.556374	0	1	1	0.556374	0.556374	0	0.556374	0.556374	0.556374	0.556374	1	0	1	1	0.556374	0.556374	0.556374	1	0	1	1	0	0.556374	0	0	0.556374	0.556374	0	0	0.147875	1	0.147875	0.556374	0.556374	0	1	0	0.556374	0.556374	0	0.556374	0.556374	0	1	0.556374
99	0.556374	0.556374	1	0.556374	0	0.556374	0.556374	0.556374	0.556374	1	0.556374	1	0.556374	1	1	0.556374	0.556374	0.556374	1	0	0.556374	1	0	0.556374	0	1	1	1	0	1	0.556374	0.556374	0.556374	0.556374	0.556374	0.556374	1	0.556374	0.147875	0.556374	0.556374	1	0	1	0.147875	1	0.556374	0.556374	1
100	1	0.556374	0.556374	1	0.147875	0.147875	0.556374	0.556374	0.147875	0.556374	0.556374	0.147875	0.556374	0.556374	0.147875	0.556374	0	0	0.556374	1	1	0.556374	1	1	0.556374	0.556374	0.556374	0.147875	1	0.147875	1	0.556374	0	0.147875	0.556374	0.556374	1	0.556374	0.556374	1	0	0	0.556374	0.556374	0	1	1	1	0.556374
101	0.556374	0.556374	0.556374	1	0.556374	0	0.556374	0.556374	1	0.556374	1	0.556374	0.556374	0.556374	0	0	0.556374	0	1	0	0.556374	1	0	1	1	1	0.556374	1	0.556374	1	0	0	0.147875	0.556374	1	1	1	0.556374	0.556374	0.556374	0	0	1	0.147875	0.556374	0.556374	0.147875	0.147875	0.556374
102	0.556374	0.556374	1	0.556374	0.556374	0.147875	0.556374	0.147875	0.556374	0	0.556374	1	0.556374	0.556374	0.147875	0.556374	0.556374	0	0.556374	0	0.147875	0.556374	0.556374	0.556374	0.556374	0.556374	1	0.556374	0.556374	0	1	0	0.556374	1	0	0	0	0.556374	0.556374	0.556374	1	0.147875	1	0	1	0.556374	0.556374	0	0.556374
103	0.556374	0	0.556374	0.556374	0	0	1	0	0.556374	0.556374	0.556374	0	0.147875	0.556374	0.147875	1	0.556374	0.556374	0.556374	0.556374	0.147875	0.556374	0.147875	0.556374	0.556374	0.147875	0.556374	0.556374	1	1	1	1	0.556374	1	0.147875	1	1	0.556374	1	0.556374	0.556374	0.556374	1	0	0	0.556374	1	1	0.147875
104	1	0.556374	1	0	0.147875	0.556374	0.556374	0	0.556374	0.147875	0	0	0.556374	0	0.556374	0.556374	0.556374	0.556374	0.556374	0	0	0.147875	0	0.556374	1	0	0.556374	0.556374	0	1	1	0.556374	0.147875	1	1	1	0	0.147875	0.556374	0.556374	0.556374	1	0.556374	0	0.556374	0	0.147875	0.556374	0.556374
105	0.556374	0.556374	0.147875	0	0	0.556374	1	0.556374	0.556374	1	0.556374	1	1	0	1	1	0.556374	0.147875	0.556374	1	0.147875	0.556374	0	0.556374	0.556374	0	0.147875	1	1	1	1	0	0.556374	0	0	0.147875	0.556374	0	0	0	0.556374	0.556374	0.556374	1	1	0	0.556374	1	1
106	1	0.556374	0.147875	0.556374	0	0.147875	1	0.556374	0.556374	0	0.556374	0.556374	0.556374	1	1	1	0.556374	0.147875	1	0.556374	0.147875	1	0.556374	0.147875	0.556374	1	0.147875	1	0	0.147875	0.556374	0.556374	0	1	0.556374	0.556374	1	0.556374	0	0	0.147875	1	0.556374	0	1	1	0	0	1
107	1	0	0	0	0.556374	0.556374	0.556374	0	0.556374	0.147875	0.556374	0	1	0.556374	0.556374	1	0.556374	0.556374	1	0	1	0.556374	0.556374	1	1	1	0	0	1	1	1	0.556374	1	0.556374	1	1	0.556374	1	1	0.556374	0.147875	0.147875	1	0.147875	0.556374	0.556374	0.147875	0.556374	0.556374
108	1	0	0.556374	1	0.556374	0.556374	0.556374	1	0.556374	1	0.556374	1	0	0	0.147875	0.556374	1	1	1	0.556374	0.556374	0.556374	0	1	0.556374	0.556374	1	1	0.556374	0	1	0.147875	0.556374	0	0	0.556374	0.556374	0.556374	0.556374	1	1	1	0	0.147875	1	0	0	0.556374	0.556374
109	0.556374	0	0.556374	0.556374	0.556374	0.147875	1	1	1	0.556374	0.147875	0.556374	0.556374	0	0.556374	0.556374	0	0.556374	1	0.556374	1	0.556374	0.147875	0.147875	0.556374	1	1	1	0.556374	1	0.556374	0	1	0.556374	0.556374	0.556374	1	0	0	1	0	0.556374	0.556374	0.556374	1	0	0	0.556374	0.556374
110	0	0.556374	0.556374	0.556374	0.556374	1	0.556374	1	0.147875	0.556374	0.556374	0.556374	1	0	0	0.556374	0	0.556374	0.556374	0.556374	1	0	0	0.556374	0.556374	0.556374	0.147875	0.147875	1	1	0	0	0.556374	0	1	1	0.556374	0.556374	0.556374	1	0.556374	0.556374	0	0.147875	0.147875	0.556374	0.147875	1	1
111	0	0.556374	0.147875	1	1	1	1	0.556374	0	0.147875	1	0.147875	0	0.556374	0.147875	1	1	0.147875	0.556374	0.556374	0.556374	1	1	1	0.556374	0.556374	0.556374	0.556374	0	0.556374	0	1	1	0.556374	1	1	0.556374	0.556374	0	0.556374	0.556374	0.556374	0.556374	0	1	1	0	1	0.556374
112	0.556374	0.147875	1	0.556374	0	0	0.147875	0.556374	0	0.556374	0	0.556374	0	0.147875	0.556374	0.556374	0	1	0.556374	0.147875	0.556374	0.556374	0.147875	1	0.556374	1	1	0.556374	1	0.556374	1	0.556374	0.556374	0.556374	0.147875	0.147875	0.556374	0.556374	1	0.147875	1	0.556374	1	0	0.556374	0.147875	0.556374	0	1
113	1	0.556374	0.556374	1	1	1	0.556374	0.147875	0.147875	0.556374	0.147875	0.556374	0.556374	0	1	1	0.556374	1	0	0	0.556374	1	0	0.147875	1	0.556374	0.556374	0	1	0	0	0	0.147875	1	1	1	0.556374	0.147875	0.556374	0.556374	0	0	1	0.556374	0.556374	0.147875	1	0	1
114	0	0.147875	0.556374	1	0.556374	1	0.556374	0	0.556374	0.556374	0	0	1	0	0.556374	0.556374	0	0.556374	0.556374	0.556374	1	1	0.556374	0.556374	0.556374	1	1	0.147875	0	0	1	0.556374	0.147875	0.556374	0.556374	1	0.556374	0.556374	0.556374	1	0	0.147875	0.556374	0	0.556374	0.556374	0.556374	0.556374	1
115	0.556374	0.556374	0	0	0.556374	1	0.556374	0.147875	0.556374	0.556374	0.556374	0.147875	1	1	0.556374	1	0	0.147875	0.556374	0.556374	0.147875	1	0	0	1	1	1	1	0	0.556374	0	1	0.556374	1	0.556374	0.147875	0.556374	0.556374	0.556374	0.556374	0	0.556374	0.556374	0.556374	1	0	0.556374	0.556374	0
116	0.556374	0.556374	0.147875	0.556374	1	1	1	0.556374	0	1	0	1	1	0	0.556374	0.556374	0.556374	1	0.556374	1	1	0.556374	0.556374	0.556374	1	0.556374	0.556374	0.556374	1	0.147875	0.556374	0.556374	1	1	0	0	1	0	0.556374	0	0.556374	0	1	1	0.556374	0.147875	0.556374	0.556374	1
117	0.147875	0.147875	0.556374	0.147875	0.556374	1	0.556374	0.147875	0.556374	1	0.147875	1	0.556374	0.556374	0	0.147875	0.147875	0.147875	0.556374	0.556374	1	0.556374	0.556374	1	0.556374	0.556374	0.556374	1	1	1	1	0.556374	0.556374	1	1	0.556374	1	0.556374	0.556374	0.556374	0	0.147875	1	1	0.147875	1	0.556374	0.556374	1
118	1	0.556374	0.556374	0.556374	0	0	1	0	0.556374	0.556374	0.556374	0.147875	1	0.556374	0.556374	1	0	0.556374	0.147875	0.147875	0.147875	0.556374	0.556374	1	0.556374	1	0	0	0.147875	1	0.556374	0	0	0.556374	0.556374	1	1	1	0	0	0.556374	0	0.556374	0.556374	0.147875	0.556374	1	1	0.556374
119	0.556374	0.556374	0.556374	0.556374	0	0.556374	1	0.556374	0.147875	0.556374	0	1	1	0.556374	1	0.556374	0	0.147875	0.556374	0.556374	0.556374	0.556374	0.556374	0	0.556374	0.147875	0.556374	0.556374	0	0	1	0.556374	0.556374	1	0.556374	1	0.556374	1	1	0.556374	0.556374	1	0	0	0.147875	1	1	0.147875	1
120	0.556374	0.556374	1	1	0	0.556374	0.556374	0.556374	1	0.556374	0	0.556374	0.556374	0.556374	1	0	0	0.147875	0	1	1	0.556374	0.556374	0.556374	1	0	0	0.556374	0	0	0.556374	0.147875	0.556374	1	1	1	0.556374	1	1	0.556374	0.556374	0.556374	0.147875	0	0	0.556374	0.556374	0	0.147875
121	1	0.556374	1	0.556374	0.556374	0.556374	0.556374	0.556374	0.556374	1	0.556374	1	0.556374	1	0.147875	0.556374	0.556374	0.147875	0.556374	0	1	0.556374	0.556374	1	1	1	0.556374	1	1	0.556374	1	0	0.556374	1	0	0	0	1	0	0	0	0.556374	0	0	1	1	0.556374	0.147875	1
122	0.556374	0.556374	0.147875	0.556374	1	0.556374	1	1	0.147875	1	1	0.556374	0.147875	0.556374	0.556374	0.556374	0	0	1	0	1	1	0.556374	0.147875	0.556374	0.147875	0.147875	0.556374	0	0	0.147875	0.556374	0.556374	0.556374	0	0	0.556374	1	0.556374	1	1	1	0	0.556374	1	0.556374	0.556374	0	0.556374
123	0.556374	1	1	1	0.556374	0.556374	0.556374	0	0.556374	0	1	1	0.556374	0.556374	1	0.556374	0.556374	0.556374	0	0.556374	0	0.556374	0	0.556374	1	1	1	0.556374	0.556374	0.147875	0.556374	0.556374	0.147875	0.556374	0	0.556374	0	0	1	1	0	0	0.556374	0.556374	0.556374	1	0	0.147875	1
124	0	1	1	0.556374	0	1	0.556374	0	0.556374	0.556374	0.556374	0.556374	1	0.147875	0.556374	0.556374	0.556374	1	1	0	1	0.556374	0	0	1	0.147875	0.556374	1	1	0	1	1	0.556374	1	0.556374	0	0.556374	0	0	1	0	0.147875	1	1	1	1	0	0.147875	0.556374
125	0.556374	0.556374	0.556374	1	0	1	0.556374	0.147875	0.556374	0.556374	0	0.556374	0.556374	0.556374	1	0.556374	0.556374	0	1	1	1	1	0.556374	0	0.556374	1	0.556374	0.556374	0.556374	0.556374	0.147875	0.556374	0.147875	1	0.147875	0.556374	1	0.556374	0.556374	0	0.556374	0	1	0	1	1	0.556374	1	1
126	0.556374	1	0.556374	0.556374	1	0.556374	1	0.556374	1	0	0.556374	0.147875	0.556374	0.147875	0.147875	0.556374	0.556374	0.147875	1	0.556374	0	1	0.556374	0.556374	1	1	1	0.556374	0.556374	1	0.556374	0	0.556374	0.556374	0.556374	0.556374	0.556374	1	1	0.556374	0.556374	0	0.556374	0.147875	1	0.556374	1	1	0.556374
127	0.556374	0	0.556374	1	0.556374	0.556374	0.556374	0.556374	0.556374	0.556374	1	0.147875	0.556374	1	1	1	0.556374	0.147875	0.556374	0	0.556374	1	0	0.556374	0.556374	0	0.556374	0.556374	1	1	0.556374	0.556374	0.556374	0.147875	1	1	0	1	1	1	1	1	0.556374	0	0.556374	0.556374	0	0.556374	0.556374
128	1	1	0.556374	0.147875	1	0	1	0	0.147875	0.556374	0	0.147875	1	1	0.147875	1	0.147875	0.556374	0.556374	0	0	0.556374	1	0	0	0	1	0.556374	1	1	0.556374	0.556374	0.556374	0.556374	1	0.147875	1	1	1	0.556374	0.147875	0.556374	0.556374	1	0.556374	1	0	0.556374	0.556374
129	0	0	0.556374	0.556374	0.556374	1	0	1	0.556374	1	0	0.556374	0	1	0.556374	1	0.556374	0.556374	0.556374	0	1	0	0	0	1	0.147875	0.556374	0.556374	0	0.556374	0.556374	0.556374	0.147875	0.556374	1	0.556374	1	0.556374	0.556374	0.556374	0.556374	0	0.147875	1	0.147875	1	0.556374	0	1
130	0.556374	0	1	0.556374	1	0.147875	1	0	1	0.556374	0	0.147875	1	1	0.556374	1	0.147875	0.556374	0.556374	0.556374	0.556374	1	0	0.147875	0.556374	0	0.556374	1	0.556374	0.556374	0.556374	1	1	1	0.556374	0.556374	0	0	0.556374	1	0.556374	1	0	1	0	1	0.556374	0.147875	1
131	0.556374	0.556374	0.556374	0	0	0	0.556374	0.556374	0	1	1	1	1	0.556374	1	0	1	1	0.556374	0	0	0.556374	0.556374	1	1	0.556374	0	0.147875	0.556374	0.147875	0.556374	0	0.556374	0.556374	1	1	1	0	0.556374	0.556374	0.556374	1	0.556374	1	0	0.556374	1	0.556374	0.556374
132	0.556374	0	0.556374	0.556374	0	0.556374	0.556374	0.556374	0.556374	0	0.556374	1	0.556374	1	0.556374	0.556374	1	0.556374	0.556374	0	0.556374	0.556374	0.147875	1	0.556374	1	1	0.556374	0.556374	1	0.556374	1	0.556374	0.556374	0.556374	0.147875	0.147875	0.147875	0.147875	0.556374	0.147875	1	0.556374	0.556374	1	0.556374	1	1	0.556374
133	0.556374	1	1	0.556374	0.556374	0.556374	0.556374	0.556374	0.556374	0.556374	0.147875	0.147875	0	0.556374	0.556374	0.556374	1	0.556374	0	0.556374	1	0	0	0.556374	0	0.147875	1	1	1	1	0	0.556374	0.556374	0	0.556374	0.556374	0.556374	0.147875	1	0	0.556374	0.556374	0.556374	0.147875	0.556374	0	0.556374	0.556374	0.556374
134	0	1	1	0.556374	0	0.556374	0.556374	1	0.556374	1	1	1	0.556374	0.556374	0.147875	0	0.556374	0.556374	0.556374	0.556374	0	0.556374	0.147875	0.556374	0	0.147875	0.556374	0	0.556374	0	0.556374	0.556374	0	0.147875	0.556374	0.556374	0.556374	1	0.556374	1	0.147875	0.556374	0.556374	0	1	0	0.556374	0.556374	0.556374
135	1	1	1	0.556374	0	1	1	0.147875	1	0.556374	1	1	0.556374	0	0.556374	0.556374	0.147875	0.556374	1	0.556374	1	0	0	0.556374	0.556374	1	0	1	1	0.556374	0	1	0.556374	0.556374	0	1	0	0.556374	1	0	0.556374	1	0	1	1	0	1	0.147875	1
136	0.556374	0	1	0.556374	0	0.556374	0	0.556374	1	1	0.147875	1	1	1	0	0	0.556374	0	1	1	1	0	0.556374	0	1	0	0.147875	0.556374	1	0.556374	1	0.556374	1	0	0	0	0.556374	0	0.556374	0.556374	1	0	0.556374	0.556374	0.556374	0.556374	1	0.556374	0
137	0.147875	0.147875	1	0.147875	0.556374	0.556374	0.556374	1	1	0	1	0.556374	0.556374	0.556374	0.556374	0	0	0.556374	0	0.556374	0.556374	0.147875	1	1	1	0	1	0	0	0	1	0.556374	1	0.147875	0.556374	0.556374	1	0	1	1	0.147875	0.556374	0.147875	1	1	0	0.556374	0.556374	0.556374
138	0.556374	0.556374	1	0	0.556374	0	1	0	0.147875	1	1	1	0.147875	0.556374	0.147875	0.556374	0.556374	0.556374	1	0	0.147875	0.556374	0.556374	1	0.556374	0.556374	0.556374	1	0	0.556374	1	0.556374	1	0.556374	0.556374	0.556374	1	0.556374	0	0.556374	0.556374	0.556374	0.556374	0.556374	0.556374	0.556374	0	0.147875	0.556374
139	0.556374	0.147875	1	1	1	0	1	0.556374	1	0	0.556374	0	1	0	0.147875	0.556374	0.556374	0	1	0	0.147875	0.556374	0.556374	1	0	0.147875	1	0.556374	0	0.556374	0.556374	0	0	1	0	0.556374	0.556374	0	0.147875	1	0.556374	0.556374	0.556374	0	0.147875	0.556374	0.556374	0.556374	1
140	0.556374	0	0.556374	1	0.556374	0	0.556374	0.556374	0.147875	0.556374	1	0.147875	0.556374	0.147875	0.556374	1	0	0.147875	0.556374	0.556374	0	0.556374	0.147875	0.556374	0.556374	0.556374	0	1	1	1	0.556374	0.556374	0.556374	1	0	0.147875	1	0.556374	0.556374	0.556374	0.556374	0.147875	0.556374	0.147875	1	1	0.556374	0	1
141	1	1	1	1	0.556374	1	0.147875	0.556374	1	1	0.556374	0	0.556374	1	1	0.556374	1	0.147875	1	0.147875	0.556374	1	0	0	1	0	0.147875	0.556374	0	0.556374	0.556374	1	0.556374	1	0	0	0.556374	0	0	0	0.556374	1	0.556374	0.147875	1	1	0	0.556374	0.556374
142	0.556374	0.147875	0.147875	0.556374	0.147875	0.556374	1	0	1	1	0.556374	1	1	0.556374	0.147875	1	0.147875	0.147875	0.556374	0.556374	0.556374	0.556374	1	0.147875	0.556374	0	0.147875	1	0.147875	0.556374	0.556374	0	0.147875	0.147875	0.147875	1	0.556374	1	0.556374	0.147875	1	0	0	0.556374	0	0.556374	0	0	1
143	1	0	1	0.556374	0.556374	0.556374	0.556374	1	0.147875	0.556374	0	1	1	0.147875	0.556374	0.556374	0.147875	0.556374	1	0.147875	0.147875	1	0	0	1	0.556374	0.147875	0.556374	0.556374	0.556374	0.556374	0	0.147875	0.556374	0.556374	1	0	0.147875	0.147875	1	0.556374	1	1	0.556374	1	0.556374	0.556374	0.556374	0.556374
144	1	0.556374	0.556374	0.556374	0.556374	0.556374	1	0.556374	1	0.556374	0	0	0.147875	0.556374	0.556374	0.556374	0.556374	1	0.556374	0	0	1	0.556374	0.556374	1	0.556374	1	0	0.556374	1	1	1	1	1	0.556374	0	0.556374	1	0.556374	1	1	0	0	0.556374	0	1	0	0.556374	1
145	0.556374	0	0	0.556374	0.556374	1	0.556374	0.556374	0	0.556374	0.556374	0.556374	0.556374	0	0.147875	1	1	1	0.556374	0.556374	1	0.556374	0	0.556374	1	0.556374	0.556374	1	0.556374	1	0.556374	0.556374	0.556374	0.556374	0	0.556374	0.556374	1	1	0	0.556374	0.556374	0.556374	0	0	1	1	0	1
146	1	0	1	0.556374	0.147875	0.147875	0.556374	0.556374	0.556374	0.147875	0.556374	0.556374	0.556374	0	0.556374	1	0.556374	0.147875	1	0.556374	0.556374	0.556374	0.556374	0.556374	0	0.147875	0.147875	1	1	0.556374	1	0.556374	1	0	0	1	0.556374	0	1	1	0	1	0.556374	0.147875	0.556374	0.556374	0	0	0
147	0.147875	0.556374	0.556374	1	0	0	0.556374	0	0.556374	0.556374	0.556374	0.147875	0	0.556374	1	0.556374	0	0	1	1	1	1	0	0.556374	0.556374	0.556374	0	0.556374	0.556374	0	1	0.556374	1	0.556374	0	0.556374	0.556374	0	1	0.556374	1	0	0	0.556374	1	1	1	0.556374	1
148	1	0.556374	0.147875	0.556374	1	1	1	0.556374	0.556374	0	0.556374	0.556374	0	1	1	0.556374	0	0.556374	1	0.556374	0.556374	0.556374	1	1	0.556374	0.556374	0.147875	1	0.556374	0.556374	0.556374	0.147875	0.556374	0.556374	0	1	1	0.556374	1	1	0	0.556374	0.556374	0.556374	1	0.147875	1	1	0.556374
149	1	0.556374	1	0.556374	0	1	1	0	0.556374	1	0	0.556374	0.556374	1	0.147875	1	0	0.556374	0.556374	0.556374	0.556374	1	0	0.556374	0.556374	0	0.147875	1	1	1	1	0.556374	0.147875	1	1	0	0.147875	0.556374	1	1	1	0.556374	1	0.556374	0.556374	0.556374	0	0	1
150	1	0	0.556374	1	0.556374	1	1	0	1	1	0	1	1	0	0.556374	0	0	0.556374	0.556374	1	0	0	0	0.556374	1	0	0.147875	1	0.556374	1	0.556374	0	0.147875	0.556374	0.556374	0	0.556374	0	0	1	0.556374	1	0.556374	0.556374	0	0	1	1	1
151	1	1	1	0.556374	0	0.556374	0.556374	0	0.556374	1	0.556374	0.556374	0.556374	0	0.556374	0.556374	0	0.556374	1	0.556374	0.147875	0.556374	0.556374	0.147875	1	0.556374	0.556374	1	0	0.556374	1	0.556374	0	0	1	0	0	0	1	0.556374	0	0.556374	0.556374	0	0.147875	1	0.147875	1	0.556374
152	0.556374	0.556374	0.556374	0	0	0.556374	1	1	1	0.556374	1	1	0.556374	0	0.556374	0.556374	0.556374	1	0.556374	0	0.556374	0	0.556374	0	1	1	0.556374	1	0.556374	0.556374	0.556374	0	0.556374	1	0.556374	0.556374	1	1	0	0	0.556374	0.556374	0	0.556374	0.556374	0.556374	0.556374	0.556374	0.147875
153	0.556374	1	0	1	0	0.147875	0.556374	1	1	0.556374	1	0	0	0.147875	0	0.556374	0.556374	0.147875	1	0.556374	0.147875	0.556374	0.147875	0.556374	1	0.556374	1	1	0	0.556374	0.556374	0.556374	0.556374	1	0.556374	0.556374	0.556374	0.556374	0	0.556374	0.556374	1	1	0.556374	0.556374	0.147875	1	0.556374	1
154	0	0.556374	1	1	0.556374	0.147875	1	0.556374	0.556374	0.556374	0.556374	0.147875	1	0.556374	1	0	0.556374	0.556374	0.556374	1	0	1	0.147875	0.556374	1	0	1	1	0	1	0.556374	0.556374	0	1	0.556374	0.556374	0.556374	0.556374	0.556374	1	0.556374	0.556374	0.556374	0	0.556374	1	0	0.556374	0.556374
155	1	0.147875	1	1	0	0.556374	0.556374	0.556374	0.147875	0.556374	1	1	0.556374	0	0.556374	0.556374	0.556374	0.147875	0.556374	0.556374	0	0.147875	1	1	0.556374	0.556374	1	0.556374	0.556374	1	0.556374	0	0.556374	1	0.556374	0.556374	0.556374	0.556374	0	0.556374	0	1	0.556374	0.556374	0	0.556374	0.147875	1	1
156	0	0.556374	0.556374	1	0.556374	1	0	1	0.556374	1	1	1	0.556374	0.556374	0.147875	1	0.147875	1	1	0	1	1	0.556374	0	0.147875	0	1	0.556374	0	1	1	0	0.556374	0	0	0.556374	1	0.556374	0	0	0	0.556374	0.556374	1	0.147875	0.556374	0	0.556374	1
157	1	0	0	0.556374	0.147875	0.556374	0.556374	1	1	0.556374	0.556374	0.147875	0.556374	0	0.147875	1	0	1	0	1	1	1	0.556374	0.556374	0.556374	0.556374	1	0	0.556374	1	0.556374	0	0	0.556374	0.556374	0.556374	0	0.556374	1	0.556374	0.556374	0.556374	0.556374	0.556374	0	0.556374	0	0.556374	0.556374
158	0	0	0.556374	0.147875	0.556374	0.556374	0.556374	0.556374	1	1	1	0.556374	1	0	0	1	0.556374	0.556374	1	0	0	0.556374	0.556374	0.556374	1	1	1	0.556374	0.556374	0	0.556374	1	0.556374	0	0	0.556374	0	0	1	0	1	0.556374	0.556374	0	0	0	1	1	0
159	1	0.556374	0.556374	1	0.556374	0.556374	0.556374	0.556374	0.556374	0	0.556374	1	1	0.556374	0.556374	1	0	1	0	0.556374	0	1	0.556374	0.556374	0	0.147875	0.556374	0	0	0.556374	0.556374	0	0.556374	0.556374	0.556374	0.556374	0.556374	1	0.556374	1	1	1	0.556374	0.556374	0.556374	0.556374	0.556374	0	1
160	0.556374	0.556374	0.556374	1	0.556374	0	0.147875	0	0.556374	0.556374	0	0.147875	0.556374	0.147875	1	1	0	0	0.147875	1	0.556374	0.147875	0.556374	0.556374	0	0.556374	0.556374	0.556374	0	0.556374	0.556374	0	1	0.556374	0	1	1	0	0.147875	0.556374	0	0	1	0	0.147875	1	1	1	0.556374
161	0	0.556374	0.556374	0.556374	0	0.556374	0.556374	0	0.556374	0.556374	0.147875	1	1	0.556374	0.147875	0.556374	0.556374	0.556374	0	1	0.147875	0.556374	0	0.556374	0	1	1	1	0	0.556374	0	0.556374	0.556374	0.556374	0	0.147875	0.556374	0.556374	1	0.556374	0.556374	0.556374	0.556374	0	0.556374	0	1	1	1
162	0	0	1	0	0.556374	0.556374	0	1	0.556374	0.556374	0.556374	0.556374	1	0	0	0.147875	0.556374	0.556374	0.147875	1	0	0	1	0.556374	0.147875	0.556374	1	0	0	0.556374	0.556374	1	0	0.556374	0.556374	0.556374	0.556374	0.556374	0	0.556374	0.556374	0.556374	0.556374	0.556374	0.556374	0.556374	0	0	0.556374
163	1	1	1	0.556374	0.147875	0.556374	0.556374	1	0.147875	0	0.147875	1	1	1	0.556374	0.556374	0.556374	0.556374	0.147875	0.556374	0.147875	0.556374	0.556374	0	0.147875	0.556374	0	0.556374	0.556374	0.556374	0.556374	0	1	0.147875	1	0.556374	0.147875	0.556374	0.556374	0.556374	0.147875	0.556374	0.147875	0.556374	0	0	0.556374	1	1
164	1	0.556374	0	0.147875	0.556374	0.556374	1	0	0.147875	0.147875	1	0.556374	1	1	0.556374	0	0	0	0.147875	1	0.556374	0.556374	1	1	0	0	0	0	0.556374	0	0.556374	0.556374	0	1	1	0	0	0.147875	0.556374	0.556374	0	0	1	1	0	1	0.556374	0.556374	0.147875
165	0.556374	1	1	1	0	0.556374	0	0.556374	0.147875	0.556374	0.556374	0.147875	1	1	0.556374	0.556374	0.556374	0.556374	0.147875	1	0.147875	1	0.556374	1	1	1	0	0	1	0	0.556374	1	0	0.556374	1	0.556374	1	0	0.556374	0.556374	1	1	0.556374	1	1	0.147875	0.556374	0	0.147875
166	0	0.556374	0.556374	0.556374	0.556374	0.147875	1	0.556374	0	0.147875	1	1	1	0.556374	0.147875	1	0.556374	0	0	1	0.556374	0.556374	1	0	1	0.556374	0.556374	0.556374	0	0	0.556374	0.556374	1	1	0.556374	0.147875	1	1	1	1	0.556374	1	0.556374	1	0.556374	0	0	0.147875	1
167	0.556374	0.147875	0.147875	0.556374	0.556374	0.556374	0.556374	0.556374	0.556374	0.556374	0.556374	0	0	1	0.556374	0.147875	0.556374	1	1	0.556374	0.556374	0.147875	0.556374	0.147875	1	0.556374	0.556374	0.556374	0.556374	0	0.556374	1	0.556374	0.147875	1	0.556374	0.147875	0.556374	0	0.556374	0	0.556374	0.556374	1	0.556374	0	1	0	0.147875
168	1	1	0.556374	0.556374	0	0.147875	1	0.556374	0	0.556374	0.556374	0.556374	0.147875	1	0.556374	0.556374	0	1	0.556374	1	0.147875	0.147875	0.556374	0.556374	0.147875	1	0.556374	0	0.147875	0.556374	0	0.556374	0.556374	0.556374	1	1	1	1	0.556374	0.556374	1	0	1	0.556374	0.556374	0.147875	0.556374	0.556374	1
169	1	0.556374	0	1	0.556374	0	0.556374	1	0	0.147875	0.556374	0	0.556374	1	0.556374	0.556374	0.556374	0.556374	0.556374	0.556374	0	0.556374	0.147875	1	1	1	0.556374	1	0.556374	1	1	0.147875	1	1	1	0	0.556374	0.556374	0	0	0.556374	0.556374	0.147875	1	0.556374	0.556374	0.556374	0.147875	0.556374
170	0.147875	0.556374	0.556374	0	1	0	1	0.147875	0.556374	0.556374	0.556374	0	0	0	0.556374	0.147875	1	0.556374	1	0.556374	0	0.556374	1	0	0.556374	0.556374	0.556374	1	0.556374	0	1	0.556374	0.147875	1	0.556374	0	0.556374	0.556374	0.556374	1	0.556374	0.556374	0.556374	0.147875	1	0.147875	0.556374	0.556374	0.556374
171	0.556374	0	1	0.556374	1	0	1	0.556374	0.556374	1	1	0	0.147875	0.556374	0.556374	0.147875	1	0.556374	0.556374	0.556374	0	1	0.556374	0	0.147875	1	0	0.556374	1	0.556374	0	1	0	0.556374	1	0.556374	0.147875	0.556374	0	0.147875	0.556374	0.147875	1	0.556374	0	0.147875	0.556374	0.556374	0.556374
172	1	0.556374	0	0.147875	0.556374	0.147875	1	1	0	0.556374	0.556374	0	0	1	0	0	1	0.556374	0.556374	0.147875	0	0.556374	1	0	0	1	1	0	0.147875	0.556374	0.147875	0.556374	1	0.147875	1	0.556374	1	1	0.556374	0.147875	1	0.556374	0.556374	1	0	0.556374	0	1	0.147875
173	0.147875	0.556374	0.147875	1	0.556374	0	0.556374	0.556374	0	0.556374	0.556374	1	1	1	0	0.556374	0.556374	0.556374	0	0.556374	1	0.556374	1	0.556374	0	1	1	1	1	0	0.556374	0.147875	1	0.147875	1	1	1	1	0	1	0.556374	0.147875	1	1	0	0.556374	1	0	0
174	0.556374	0.556374	0	0.147875	0.556374	1	1	0	0.147875	0.556374	0	0	0.556374	0.556374	0.556374	0.147875	1	0.556374	0.147875	0.556374	0.556374	0.556374	0.556374	0	0.147875	1	1	0	0	0	1	0.556374	0	0.147875	1	0.556374	0.556374	0	0.556374	0.556374	1	0.556374	0.556374	0	0	0.556374	0	0.147875	1
175	1	0.556374	1	1	0.556374	1	1	0.556374	1	1	1	0.147875	1	1	0	0	1	0	0	0.556374	0.556374	0.556374	0.556374	0	0.147875	0.556374	0	0.556374	0	0	0.556374	1	0.556374	0.556374	1	0.556374	1	0.556374	0.556374	0.556374	0.556374	0.147875	0.556374	0.556374	0.556374	1	1	0.556374	0.556374
176	0.556374	0.556374	0.556374	0	1	1	1	1	0.556374	0.556374	1	0	0.556374	1	0	0.556374	0.556374	0.556374	0.556374	1	0.556374	1	0.556374	0	1	1	0.556374	0.556374	1	0	1	1	0	0	0	0.556374	0	1	1	0.147875	0.556374	0	0.147875	1	1	0.556374	1	1	0.556374
177	0.556374	0.556374	1	0.556374	1	0.556374	0.147875	0.556374	0.147875	0.147875	1	0.556374	0	1	0	0.556374	0.556374	0	1	0.556374	0	0.147875	1	0	1	1	1	0.556374	1	0.556374	1	1	0	0.147875	1	0	0.147875	1	0.147875	1	1	1	0.147875	1	0	1	0.556374	0.556374	0
178	0.147875	0.556374	0	0	0.556374	0.556374	0	1	0.556374	1	0.556374	1	0	1	0.556374	0.556374	1	0	0.147875	1	0.556374	0.556374	0	0.556374	0.147875	1	0.556374	1	0.556374	1	1	1	0	0.556374	0.556374	0	0.556374	0.556374	0	1	0.556374	0	0.556374	0.556374	0.147875	0.147875	0.556374	0.556374	0
179	0	1	0	0.556374	0.556374	0	1	0.556374	0.556374	0.556374	0.556374	0	0.556374	0	1	0	1	1	1	0	0.556374	0.556374	0.556374	1	0.147875	0.556374	0	0	1	0.556374	0.147875	0.556374	0.147875	1	0.556374	0.556374	1	0.556374	0.147875	1	1	0	0.556374	1	1	1	1	0	0.556374
180	1	0.556374	0.556374	1	1	0.556374	1	0.556374	0	1	1	0	0.556374	1	0	0.556374	1	0	1	0.556374	0.556374	0.556374	0.147875	0.556374	0.147875	0.556374	1	1	1	0.556374	0.556374	0	0.556374	0.556374	0	1	0.556374	1	0	1	0.556374	0	0.556374	1	0	0.556374	1	0.556374	0.556374
181	1	0.556374	0	0	0.556374	1	0.556374	1	0.556374	1	0.147875	1	0.147875	1	0.556374	0.556374	1	0.556374	1	1	0.556374	1	0	1	1	1	0.556374	1	1	0.556374	0.556374	1	0.556374	0.147875	1	0.556374	1	0.556374	0.556374	0.556374	1	0.556374	0.556374	0.556374	0	0.556374	1	0.556374	0.147875
182	0	0.556374	0.556374	0.556374	0	0	0.556374	0.556374	1	1	1	0	1	0.556374	0	0	1	0.556374	0.556374	0	0.556374	1	0.556374	1	1	1	0.556374	0.556374	1	0	0.556374	1	1	0.147875	0.556374	0.556374	0.147875	0.556374	0	0	0	0.147875	0.556374	0	0.556374	0.147875	0.556374	0.556374	0.147875
183	0.147875	0.556374	1	1	0.556374	0.556374	0.556374	0	0.556374	0.556374	0.556374	1	0.556374	1	1	1	1	0	0.556374	0.556374	0	0.556374	0.556374	1	1	0.556374	0.556374	1	0	0	0	1	0.147875	0.556374	0.556374	0	0	0.147875	0.556374	1	1	0.556374	1	0.556374	1	0.147875	0.556374	0	0.556374
184	0.556374	1	0.556374	1	0.556374	0	0.556374	1	0.556374	0.147875	0.556374	0	0.556374	0	0.147875	1	1	0.147875	0.556374	0.556374	0	0.147875	0.556374	0.556374	0.147875	1	0	0.147875	1	0.556374	0.556374	0.556374	0	0.147875	0.556374	0	0.556374	1	0	0.556374	0	1	1	1	1	0.556374	1	1	0
185	0.147875	1	0	1	0.147875	0.556374	0.556374	0	0	1	1	0	0.556374	1	0	1	0	0.556374	1	0	0.556374	0.556374	0	0.556374	0.556374	0.556374	0.556374	1	0.147875	1	1	1	0	0	0.556374	0.556374	0.147875	1	0	0	0.556374	1	0.556374	1	1	1	0.556374	0	0
186	1	0.556374	1	0.556374	0.556374	0.556374	0	1	0.556374	1	0	0	0	0.556374	0.556374	0.556374	0.556374	1	0.556374	1	0	0.556374	1	0	0.556374	0.556374	0.556374	0.556374	1	0.556374	1	1	0.556374	1	0.556374	0	0.556374	1	0	0.147875	1	0	0.147875	0.556374	0.556374	0.556374	1	0	1
187	0.147875	0	0.556374	0.556374	1	0	0.147875	1	0.556374	0.556374	0.556374	0.556374	1	0.556374	0.556374	1	0.556374	0	1	1	0	0.556374	1	0	0	0	0.556374	0.556374	0.556374	0	0.556374	0.556374	0	0.556374	0.556374	0	0	0.556374	1	0.556374	1	0	0	0.556374	0.556374	0.147875	0.556374	0	0.556374
188	0.556374	0	0	1	1	0	0.556374	0.556374	0.556374	0.556374	1	0	0.556374	1	0.556374	0.556374	0	0.556374	0.556374	0.556374	0.556374	0.147875	0.147875	1	1	1	0.556374	0	0.556374	0	1	0	0.556374	1	1	0	0	1	1	0	0.147875	0.556374	0.556374	0.556374	1	0	0	0	0.556374
189	0.147875	0.556374	1	0.147875	1	0.556374	0.147875	1	0.147875	0.556374	0.556374	0.556374	0.556374	0.556374	0	0	1	0.556374	0.147875	1	1	1	1	1	0.147875	1	1	1	0.556374	0.556374	0.147875	1	0	1	0.556374	0.147875	1	1	0.556374	0.556374	0.556374	0.556374	0.147875	0.556374	0.556374	0.147875	0.556374	1	0.147875
190	0.556374	0.556374	0.556374	0	0.556374	0	0	0.556374	1	1	1	0	0.556374	1	0.556374	0.556374	0.556374	1	1	1	0	0.556374	0.556374	1	1	0.556374	0.556374	1	0.556374	1	0.147875	1	0	0.556374	0.556374	0.556374	1	0.556374	0	0.556374	0.556374	0.556374	0.556374	1	0.147875	0.147875	1	0	0
191	0.556374	1	0	0.556374	0.556374	0.556374	0	0.556374	0.556374	1	1	0.556374	0	0.556374	1	0.556374	1	0.556374	0.556374	0.556374	0.556374	0.556374	1	1	0	1	0.556374	1	0	0	1	0.556374	0	0.556374	1	0.556374	0.556374	0.556374	0.556374	1	0.556374	0.147875	0.556374	0.556374	0.147875	1	0.556374	0	0.147875
192	0.147875	1	0	0.556374	1	0	0.556374	0.556374	0.556374	0.556374	1	0.556374	1	0.556374	0	0.556374	0.556374	0.556374	1	0.556374	0.147875	0.556374	0.556374	0.556374	1	0.556374	0	0.556374	1	0	0	1	0.556374	0.147875	1	1	1	1	0	0.556374	0	0	0	1	1	0.556374	1	0	0.556374
193	0.556374	0.556374	0.556374	1	0.556374	0	0.147875	0.556374	1	0.556374	0.556374	1	0.556374	0.556374	0.556374	1	0.556374	0.556374	0.556374	1	1	1	0.556374	0.556374	0	0.147875	1	0.556374	0.147875	0.556374	1	0	1	0.556374	0.556374	1	1	0.556374	0.556374	1	1	1	1	0.556374	1	0.556374	1	0	1
194	1	0.556374	0.556374	0.556374	0.556374	0.147875	1	0.556374	1	0.556374	0.556374	0.556374	0.556374	0.556374	1	0	0	0.556374	0	0	0.556374	0.556374	0	1	1	0.556374	0.556374	0.556374	0.556374	0.556374	1	0	0	0.147875	0.556374	0.556374	0.556374	0.147875	1	1	0.556374	0	0.556374	1	0.556374	0.556374	0.556374	0	0.556374
195	0.556374	0.556374	0	0	0.556374	0.556374	1	0.556374	0	0.556374	0.556374	0	0.556374	0.556374	0	0.556374	0.556374	0.556374	0	0.556374	0	0.556374	0.556374	0.147875	1	1	0.556374	0.147875	1	0.556374	0.556374	0.556374	0	0.556374	0	0	0.556374	0.556374	0.556374	1	0.556374	0	0.147875	0.556374	0.556374	0.556374	0	0.147875	0.556374
196	0.556374	1	0.556374	1	0.556374	0.556374	1	1	0.556374	1	0	0.556374	0.556374	0.556374	1	1	0	0.556374	0.147875	0.556374	0	0.556374	0	0	0.556374	1	0	0.147875	1	0.556374	1	0.556374	1	1	0.556374	0.147875	0.147875	1	0	0.556374	0.556374	0.556374	0.556374	0.556374	0.556374	0.147875	1	0.556374	1
197	0	0.556374	1	1	0.556374	0	0.556374	1	0.556374	1	0.556374	0.147875	0.147875	0.556374	0.147875	1	1	0.556374	0.147875	0.556374	0.147875	1	1	0.556374	0	0	0	0.147875	1	1	1	0.556374	0.556374	0.147875	0.556374	0	0.556374	0.556374	0.556374	0.556374	0.556374	0	0.556374	0	0.556374	1	0.556374	0.556374	0
198	0.556374	0.556374	0.556374	0.556374	0.556374	1	0.556374	1	0.556374	0.147875	0.556374	0.556374	0.556374	0.556374	0	1	1	0.556374	0.147875	1	0.556374	0.556374	0	0	1	0.556374	0.556374	0	0.556374	0	0	1	0.556374	0	0.556374	0.556374	0	0	0	0.556374	0.556374	0.556374	0	0.147875	0.556374	0.556374	0.556374	0.147875	1
199	0.556374	0.556374	1	1	1	0.556374	0.556374	1	0.556374	1	0.556374	0	0.147875	1	0.147875	1	0.556374	0.556374	1	0.556374	0	0.556374	0.556374	0.556374	0.556374	0.556374	0	0.147875	1	0.556374	0.147875	0.556374	0.556374	1	0.556374	0	1	1	0.147875	0.147875	1	0.556374	0.556374	1	1	1	1	1	0
200	1	1	0.147875	1	1	0.556374	0.556374	1	1	0.147875	1	0.556374	1	0	0.556374	0.556374	1	0	1	0.556374	1	0.147875	1	0.556374	0	1	0	0	1	0	1	1	0	0.556374	0.556374	1	1	1	0.556374	1	0.556374	0.556374	0	0.556374	0.556374	0	0.556374	0.556374	0.556374
201	0	0.556374	0	0.556374	0.556374	0.556374	1	0.147875	0	0.147875	0.556374	1	1	0.556374	0.556374	1	1	0.556374	0	1	0	0.556374	1	0	0.556374	0	0	1	0.556374	0.147875	1	0.556374	0	0.556374	0.556374	1	1	0	1	0.147875	1	0	0	0.556374	1	1	1	1	0.556374
202	0	1	0	0.556374	1	0	0.556374	1	0	0.556374	1	0.556374	1	0.556374	0.556374	0.556374	0.556374	0.556374	0.556374	0.147875	1	0.556374	0.556374	1	0.556374	0.556374	0.556374	0	0.556374	0	0.556374	0	0	1	0	0	0	0.556374	0.556374	0	0.556374	1	1	0.556374	0.147875	1	0.556374	1	1
203	0.556374	1	0.556374	1	0	1	1	0.556374	0.556374	0.556374	0.147875	0.556374	1	0.556374	0	1	0.556374	1	1	0.147875	1	1	0.147875	0.147875	0.556374	0	0.556374	0	0	0.556374	0.147875	1	1	1	1	1	0.556374	0.556374	0.556374	0.556374	0.556374	0	0.556374	0	0.556374	0	0.556374	0.556374	0.556374
204	0	0.147875	1	1	0.147875	1	1	0.556374	0	0.556374	0	1	1	1	1	1	0.556374	0.147875	1	0.147875	0.556374	0.556374	0.147875	0.556374	1	0	0.556374	0.556374	0.556374	1	0.556374	0	0.556374	0.556374	0.147875	0.556374	0.556374	0	0.556374	0.556374	0.556374	0.556374	1	0.556374	0.556374	0.556374	0	0.147875	1
205	0.556374	1	0.556374	0.556374	0.556374	0.556374	1	1	1	0.556374	0.556374	0.556374	0.147875	1	0.556374	0.556374	0.556374	0.556374	0	1	0	0.556374	0	0	1	0	0.556374	0	0.556374	0	0.556374	0.556374	0.556374	1	0.556374	0	0.147875	1	0.556374	0.556374	0.556374	0.556374	0.556374	0.556374	0	0.556374	0.556374	0.556374	1
206	0.556374	1	0	1	1	0	1	0.147875	0.556374	1	1	0	0.556374	1	0	1	1	0.556374	0.147875	0.556374	0	0	0.556374	0	0.556374	1	0	0.556374	0.556374	0.147875	0.556374	0.556374	0.556374	0.147875	1	0.556374	0.556374	0.556374	0.556374	0.556374	1	0.556374	0.556374	0.556374	1	1	0.556374	0.556374	0
207	0	0.556374	1	0.556374	0.147875	0.556374	0.147875	0	0.556374	0.556374	0.556374	0.147875	0.556374	0	0.556374	0.147875	0.556374	0	0.556374	0.556374	0.556374	0.556374	0	0.556374	0	0.556374	0.556374	1	0	0.556374	0	0.556374	0	0.147875	0.556374	0.147875	1	0.556374	0.556374	0.556374	1	0.556374	0	0	0.556374	1	0.556374	0.556374	0.556374
208	1	1	0.556374	1	0.556374	0.147875	0.556374	0.556374	0	0.147875	1	0.147875	0.556374	0.556374	0	0.556374	1	0.556374	0.556374	0.556374	0.556374	0.147875	0.556374	1	0.147875	1	0.556374	0	1	0	1	1	0	1	0.556374	0.556374	0.556374	1	0.556374	0	0.556374	0.556374	1	1	0.556374	0	0.147875	0.556374	0.556374
209	0	0.556374	0	1	0	0	0	1	0.556374	0	0.556374	0.556374	0.147875	1	0.556374	1	0.556374	1	0.147875	1	0.556374	0.147875	0.556374	0.556374	0.147875	0.147875	0.556374	1	0.556374	0.556374	0.556374	0.147875	0	0.147875	0.556374	0.556374	0.556374	0.556374	0	0.556374	1	0.556374	0	0.556374	0	0.147875	0.556374	1	0.147875
210	0.556374	1	0.556374	0	0.556374	0	1	1	0.556374	0.556374	0.556374	0.556374	0.556374	0.147875	0.556374	0.556374	0.556374	0	1	0.556374	0.556374	0.556374	1	0.556374	0	0.147875	1	1	0.556374	0.147875	1	1	0.556374	0.147875	0.556374	0.556374	0	1	0.147875	0	0.556374	0.147875	0.556374	0.556374	0.556374	0	0.556374	0	0.556374
211	0.556374	0	0	0.147875	1	0.556374	0	0.556374	0	0.556374	0.147875	0.556374	0.556374	0.556374	0	0.147875	1	0.556374	0	1	0.147875	0.556374	0.556374	0	1	1	0	1	0.556374	0	0.556374	1	0.556374	0.556374	0.556374	0	1	0.556374	0.556374	0.556374	0.556374	0	0.147875	1	0.556374	0.556374	0	0	1
212	0.147875	1	0	0.147875	0	0	0.147875	1	0.556374	0.147875	0.556374	0.556374	1	0.556374	0.556374	1	1	0.556374	0	0.147875	1	1	0	0.556374	0.556374	1	0.556374	1	0	0.556374	0.556374	0.556374	0	0.147875	1	0	0.556374	0.147875	0.147875	0.147875	0.556374	0	0.147875	0.556374	0.147875	1	0.556374	0.556374	0
213	0.556374	0.556374	0.556374	0.147875	1	0.556374	0	0.556374	0.556374	0	1	0.556374	0.556374	0	1	1	0.556374	0	0	0.556374	0	0.556374	0.556374	0.147875	1	0.147875	0.556374	0.556374	0.556374	0.556374	0.556374	0.147875	0.556374	0.556374	0.147875	0.556374	0.147875	0.556374	0.556374	1	0.556374	0.556374	1	0.556374	0.556374	0.556374	1	0.556374	1
214	0	1	0	0.556374	0.556374	0	0.556374	0.556374	0	0.147875	0.556374	1	1	0.556374	0.556374	0.556374	1	0.556374	0.147875	1	0.556374	1	1	1	0.147875	1	0.147875	0	1	0.556374	0.147875	1	0.556374	0.556374	0	0.556374	0	1	0.556374	0.556374	0.556374	1	1	0.556374	0.147875	0.556374	0.556374	0	0.556374
215	0	0	0.556374	0.147875	1	1	0.556374	1	0.147875	0.556374	0.556374	0	0.147875	0.556374	0.556374	1	1	0	1	0.556374	0.556374	0.556374	0.556374	1	1	0.556374	0.556374	0.556374	0.556374	0	0.556374	1	0	0.556374	0.556374	0	0.147875	1	0.556374	0	1	0.147875	0.147875	0.556374	0.556374	0.147875	1	1	1
216	0.556374	1	0	0	1	0.556374	0.556374	0	0.556374	1	0.556374	0.556374	0	1	1	0.147875	1	1	1	1	0.556374	1	0.556374	0.556374	0	1	0.556374	0	1	0.556374	0.147875	1	0.556374	1	1	0.556374	0	1	0.556374	0.556374	0	1	1	1	0.556374	0.147875	0.556374	0.147875	0.556374
217	0.147875	0.556374	0	0.147875	0.147875	0.556374	0.147875	0.556374	0	0.147875	0.556374	1	1	0.556374	0.556374	1	1	0	0	1	0	0	1	0	1	1	0	0	0.556374	0	1	0.556374	0	0	0.556374	0.556374	0	1	0	0.147875	1	0.556374	1	0.556374	0.556374	0.556374	0.556374	0	0
218	1	1	0	0.556374	0.556374	0.147875	0.556374	0.556374	0	0.147875	0.556374	0.556374	1	0	0.556374	0.556374	0.556374	0.556374	0.556374	0.147875	0	0.147875	0.556374	0.147875	0.556374	0.556374	0	0.147875	1	0	1	0.556374	1	0.147875	0.556374	0.556374	0	1	0	0.147875	0.556374	0.556374	0.556374	1	1	0.147875	0.556374	0.556374	0.556374
219	0.556374	0.556374	0.556374	1	0	0.556374	0.147875	1	0	0.147875	0.556374	0.556374	1	0	0	0.147875	0.556374	0.556374	0	0	0	0.556374	0.556374	0.556374	1	0	0	0	1	0.147875	0	1	0.556374	0.147875	0.556374	0.556374	0.147875	1	0.556374	0	0.147875	1	1	1	0.556374	0.147875	0.556374	0	0.147875
220	0	0	0.556374	0.556374	1	0	0.147875	1	0.556374	1	0	1	0.556374	1	1	1	1	0.556374	1	0	0	0	0	0.556374	1	0	0	0.147875	1	0	0	0.556374	1	0	0	0.556374	0.556374	0.556374	0.556374	0	0.147875	0.556374	0.556374	0.556374	0	0.556374	0.556374	0.556374	1
221	1	0.556374	0.147875	0.147875	1	0	0	1	0.556374	1	0.556374	1	1	0.556374	0.556374	0.556374	1	1	1	0	0	0.147875	0.556374	0	0.147875	0.556374	0.556374	0.147875	0.556374	0	0	1	0.147875	0.556374	0	0.556374	0.147875	0.556374	0	0.556374	1	1	1	0.556374	0	0.147875	0.556374	0.147875	1
222	1	1	0	1	0	0.556374	0.147875	1	0	0.556374	1	0	0	1	1	1	0.556374	0.556374	0.147875	1	0	0.147875	1	1	1	0.556374	0	0	0	0.147875	1	0.556374	0.556374	0.147875	1	0	0.147875	0.556374	0.556374	0.556374	0	0	0.556374	1	0.556374	0.147875	0.556374	0	0
223	0.556374	1	0	1	1	0.556374	1	0	0	0.147875	0.556374	0	0.147875	0.556374	0.556374	0.147875	0.556374	0	1	1	0.556374	0.147875	0.556374	0.556374	0.556374	0.147875	1	0.147875	1	0.556374	0.556374	0.147875	0.556374	0.147875	0.556374	0	0.556374	0.147875	0.556374	1	0.556374	0	0.556374	0.556374	0.556374	0	0.556374	0.556374	1
224	1	1	0.556374	0.556374	0	1	0.556374	1	0.556374	1	0	0	0	0.556374	0.556374	0	1	0	1	1	0	0	0.556374	0	0	0.556374	0	0.147875	0.556374	1	1	0.556374	0	0	1	0	1	1	1	0.147875	1	0.556374	1	0	0.556374	0.556374	0.556374	0	0.556374
225	0.147875	0.556374	0.556374	0.147875	1	0	0	0.147875	1	1	0.556374	0.556374	1	0	0	0.147875	1	0.556374	0	1	0	0.147875	0.556374	0.556374	0	0.147875	0	1	1	0.556374	0.556374	0.556374	0	0	1	0.556374	0	0.147875	0.556374	1	0	0	0.147875	0.556374	0	0	1	0.556374	0.147875
226	0	1	0	0	1	1	1	0.556374	0	1	1	0.556374	0	0.556374	1	1	0.556374	0.556374	1	0.556374	0.556374	0.556374	0.556374	0.147875	0.147875	0.147875	0.147875	0.147875	0.556374	0	0.147875	1	0	0.556374	0	0	0.147875	0.556374	0.147875	0.556374	0	0.556374	0.556374	0.556374	0	0.147875	1	0.556374	1
227	0	0.556374	0.556374	1	0.556374	0	0.556374	0.556374	0.556374	1	0.556374	0.556374	0.556374	0	0.556374	0.556374	0.556374	0.556374	0.147875	0.556374	0.556374	0.556374	0.556374	0	0.556374	1	0	0	0.556374	0.556374	0.556374	1	1	1	0.556374	0	0.556374	1	1	1	0.556374	0	0.147875	1	0.556374	0	1	0.556374	0.147875
228	1	1	0.556374	0	0.556374	0	0.556374	0.556374	0.556374	0.556374	0.556374	1	1	0.556374	0	0	0.147875	0	0	0.556374	0.147875	1	1	0	0.556374	0.556374	0	0	0.556374	0	1	0.556374	0.147875	0.556374	0.556374	0.556374	0.556374	0.556374	0.556374	0	1	0	0.147875	1	0	0.147875	0.556374	0.556374	1
229	1	1	0	0	0	0.147875	0	0.556374	0.556374	0.147875	0.556374	0	0.147875	0.147875	0.556374	1	0	0	0.147875	0.147875	0	0	1	1	0	0	0	0.147875	0	0	0.147875	1	0	1	0.556374	0	1	0.556374	0.556374	0.556374	0.147875	0	0.147875	0.556374	0.556374	0	1	0	0.556374
230	0.556374	0.556374	0.556374	0.556374	0.556374	1	1	0.556374	0.556374	0.147875	0.556374	0.556374	0.147875	0.556374	0	0.147875	1	0.556374	1	0.556374	0.556374	0.556374	1	0	0.556374	0.556374	0.556374	0	1	0	0.556374	0.556374	0	0	0.556374	0	0.556374	0.556374	0	0.147875	1	0.556374	0.556374	0	0.556374	0	0.556374	0.556374	1
231	0.556374	0.556374	0.147875	1	0.556374	0	0.556374	1	0.556374	0.147875	0.147875	0.147875	1	0	1	0.147875	0.556374	0	0	0.556374	0.147875	0.556374	0.556374	1	1	1	0	0.556374	0.556374	0.556374	1	1	1	1	0.556374	0.556374	0.556374	0.556374	0.556374	0	1	0	0.147875	1	0.556374	1	1	0	0.556374
232	1	0.556374	1	0.147875	0.556374	0	1	0.556374	0	0	1	0.147875	0.556374	0.556374	0.556374	0	0.556374	0.147875	1	1	0	0	0.556374	0.147875	0.147875	1	0.556374	1	0	0.556374	0.147875	0.556374	0.147875	0	0.556374	0.556374	0	1	1	1	1	0	1	1	0	0.556374	0.556374	0.147875	0.556374
233	0.556374	1	0.556374	1	0	0.147875	0.147875	1	0.556374	0.556374	0.556374	0.556374	1	0.556374	0	0	0	0	0.556374	1	0	0.147875	0.147875	0.556374	1	0.147875	0	1	1	0.556374	0	1	1	1	1	0	1	0.556374	0.556374	0	1	0	0.556374	1	1	1	1	0.556374	1
234	0.556374	1	0.556374	0.556374	0.556374	0.556374	1	1	0.556374	0.556374	0.556374	0.556374	0	1	0.556374	1	1	0.556374	1	0	0.147875	0.556374	0.556374	0.556374	0.556374	1	0	1	0.147875	0.556374	1	1	1	0.147875	0.556374	0	1	0.556374	0.556374	1	0.556374	1	0.147875	1	0	0	0.556374	0.556374	1
235	1	1	0.556374	1	1	0	0.147875	1	1	1	0.147875	0.556374	0.556374	0.556374	0	0.147875	1	1	1	0.556374	0.556374	0.556374	0	1	1	1	0.556374	1	1	1	0.147875	1	1	1	1	0.147875	1	0.556374	0.556374	1	1	0.147875	0.147875	1	0.556374	1	0.556374	1	1
236	0	0.556374	1	1	1	0	0.147875	0.556374	0.556374	1	0.556374	0	0.147875	1	0	0.147875	1	1	1	1	0	0.147875	0.556374	0	0	1	0	0	1	0	0.147875	0	0	0.147875	0.556374	0.556374	0.147875	0	0.147875	1	0.556374	0	0	0.556374	0	0.556374	0.556374	0	0.147875
237	0.147875	0.556374	0.147875	1	0.556374	0	0	1	0	0	0.556374	0.147875	0.147875	1	0	1	1	0	0	1	0	0.147875	1	0	1	1	0.556374	1	0.556374	0	0.147875	0.556374	0	0	0.556374	0	1	0.556374	0	1	0.556374	1	1	0.556374	0.147875	1	0.556374	0	0.147875
238	0.147875	0.556374	1	1	0.556374	0	0.147875	1	1	0.556374	1	0.147875	0.556374	0.556374	0.556374	0.556374	0.556374	1	0.147875	0.556374	0	0.556374	1	0	0.147875	1	1	1	1	0.556374	0	0.556374	0.556374	0.556374	0.556374	0.556374	1	1	0	1	0.147875	0.556374	0.556374	0.556374	0.556374	0.556374	1	0	1
239	1	1	0.556374	0.556374	0.556374	0.556374	0.556374	1	1	1	1	1	1	0.556374	0.147875	0.556374	0.556374	0	0.556374	0.556374	0	0.147875	0.556374	0.556374	1	0.556374	0.556374	1	0.556374	0	0.147875	0.556374	0.556374	1	1	1	0.147875	0.556374	0.147875	0.147875	1	1	1	1	0	1	0.556374	0.556374	0.556374
240	0.556374	0.147875	0.556374	0.556374	0.556374	1	1	0.556374	0.556374	0.556374	0.556374	0	0.556374	0.556374	1	1	0.556374	0	0	0	0.556374	0.556374	0.556374	0	0.147875	1	0	1	0.556374	0.556374	1	1	0.147875	0.147875	0.556374	1	1	0	1	1	0.556374	0.556374	0.556374	0.556374	0	1	0.556374	1	1
241	0.147875	0.556374	1	0.147875	0.556374	0.556374	0.147875	0	0.147875	1	0.556374	0.556374	1	0	0.556374	0	1	0.556374	0.556374	0.556374	0.556374	1	0.147875	0	0	0.556374	0.147875	0.147875	1	0.556374	1	0.556374	0.556374	1	1	1	1	0	1	1	1	1	1	0.556374	1	0.147875	0.556374	0.556374	0
242	0.147875	1	0	0	0.147875	1	1	1	0.556374	1	0.556374	1	1	0.556374	0.556374	0.147875	1	1	1	1	0	1	0.556374	0	0.147875	1	0	0.147875	1	0	1	0.556374	0	0.556374	0.556374	0	0.147875	1	0	1	1	0.556374	0.556374	0.556374	1	0.147875	1	0	0.147875
243	1	0.556374	0.556374	0.147875	0.556374	0	0	1	0	1	0.556374	1	1	0	0.147875	0.556374	0.556374	0	0	1	1	1	0.556374	0.556374	0.147875	0.556374	1	0.147875	0.556374	0.556374	1	1	0.556374	1	0.556374	0.556374	0.556374	0.556374	0	0	0.556374	0	1	1	1	1	1	0	0.556374
244	0	0.556374	0.556374	1	0.556374	0.556374	1	0.556374	0.556374	0	1	0	0	1	0	0.556374	1	0	0	0	0.556374	0.556374	0.556374	0.147875	0.556374	0.556374	0.556374	1	0.556374	0.556374	1	0.556374	0.556374	0.556374	1	0	0	0.147875	1	1	0.556374	0.556374	0.556374	0.556374	1	0.147875	1	0	1
245	0	0.556374	0.556374	1	0.556374	0.556374	0.556374	0.556374	0.556374	1	1	0	1	1	1	0.147875	1	1	0.147875	1	0	1	1	1	0	0	0.556374	0.556374	0.556374	0	0	0.556374	1	1	0.556374	0	1	0.556374	0	0.556374	1	0.556374	1	1	0	1	0.556374	0.556374	0.147875
246	0.556374	0.556374	0	0.147875	1	0	1	1	0	1	0.556374	0	0.556374	1	0	1	1	0.147875	1	0.556374	0	0.556374	0.147875	0	0.556374	0.556374	0.556374	0.556374	0.556374	1	1	0.147875	0	0	0.556374	0.556374	0.556374	0.556374	0.556374	0.556374	0.556374	0	1	0.556374	0	0.556374	0	0	0
247	0.556374	0.556374	1	0	0	0.556374	0.556374	1	0	0.556374	0.556374	1	1	0.556374	0.556374	0.556374	0.556374	0	0.556374	0.147875	1	1	0.147875	1	1	0.556374	0.556374	0.556374	0.556374	0.556374	0.556374	1	0.147875	0.147875	1	0.556374	0.147875	1	0.556374	0.556374	0.556374	0	0.147875	0.556374	0	0.147875	1	0.147875	0.147875
248	0.147875	1	0	1	0.147875	0.556374	0.556374	1	1	1	0.556374	1	0.147875	1	0	0	0.556374	0	0.556374	0	0.556374	0.556374	0.556374	0	0.147875	0.556374	1	0.147875	0.556374	0.556374	0.556374	0.147875	0	0.556374	0	1	1	0.556374	0.147875	0.556374	0.556374	0	0.147875	1	1	0.147875	0.556374	1	0.147875
249	0.556374	0.556374	0	0.147875	0.556374	1	0.556374	1	0.556374	1	0.556374	0.556374	0	1	1	0.147875	0	1	1	0.556374	0	0	1	0.147875	0.556374	0.556374	0.556374	0.556374	0.556374	0.556374	1	0.556374	0	0	1	0	0.556374	0.556374	0	0	1	0.556374	1	1	0	0	0.556374	0.556374	0.556374
250	0.556374	0.556374	1	1	1	0	0	0.556374	0	0.556374	0.556374	0.147875	1	0.147875	0.556374	0.556374	0.556374	0.556374	1	0.556374	1	0.147875	1	0	0.147875	0.556374	0.556374	0.147875	0.556374	0	0.556374	0.556374	0	1	0.556374	1	1	1	0.556374	0.556374	1	0.556374	0.556374	1	0.556374	1	0.556374	0	1
251	0	0.556374	0	0	0.147875	0.556374	0.556374	0.556374	0	0.147875	0.556374	0.556374	0.147875	0.147875	0	0.556374	0.556374	1	1	0.556374	0.556374	0.556374	0.556374	0	0.556374	1	0.556374	0.556374	0.556374	0.147875	1	1	1	1	0.556374	0	0.556374	0.556374	0	0	0.147875	0.556374	1	0.556374	0.556374	0.556374	0.556374	0.147875	0.147875
252	0.147875	0.556374	1	1	1	0.556374	0.556374	0.556374	0.147875	0.556374	0.556374	1	0.147875	0.556374	1	1	0.556374	0.556374	0	1	0.556374	0.556374	1	1	1	0.556374	0.556374	0.556374	0.556374	0	0.556374	0.556374	0	1	1	1	1	1	0	0	0.556374	0	0.556374	1	1	0.147875	1	1	1
253	0.556374	0.556374	0	0.556374	0.556374	0	0.147875	1	1	1	1	0	0	0.556374	0	0	1	1	1	0.556374	0.556374	0.556374	0.556374	0.556374	0.147875	1	0	1	0.556374	1	1	1	0	0.556374	1	0	0.556374	0.556374	0.556374	0.556374	1	0.556374	1	1	0.556374	0.556374	0.556374	0.556374	0.147875
254	0.556374	1	1	1	0.556374	0.556374	0.556374	0.556374	0.147875	0.556374	0.556374	0.556374	0.556374	0.556374	0	1	1	1	1	0.556374	0	0.556374	0.556374	0.556374	0.147875	0.556374	0.556374	0.556374	0.556374	0	0.556374	0.556374	0.556374	0	1	1	1	0.556374	0.556374	0.556374	0.556374	0.147875	0.147875	0.556374	0	1	1	1	1
255	0.556374	0.556374	1	0.147875	1	0.556374	0	0.147875	1	1	1	0	0.147875	0.556374	0	0.556374	0.556374	0.147875	1	0.556374	0	0	0.556374	0.556374	0.556374	0.556374	0	0.147875	1	0.147875	1	1	0	0.556374	0.556374	0.147875	0.147875	0.556374	0.556374	1	0.556374	0.556374	0.556374	0.556374	0	0.556374	0.556374	0	0.147875
256	1	0.556374	0.556374	0.556374	0.556374	0	0.556374	1	1	1	0.147875	1	1	1	1	0.147875	0.556374	0.556374	0.556374	1	1	1	0	1	1	1	0.556374	0.556374	0	0.147875	0.147875	0.556374	0.556374	1	1	0.556374	0.556374	0.556374	0	0.556374	1	0	0.556374	1	0	0	0.556374	0	0.147875
257	0.147875	1	0.556374	0.556374	0.556374	0.556374	0.147875	0.147875	0.556374	0.556374	1	0.556374	1	0	0	0.556374	1	0	0.556374	0	1	1	0.556374	0.556374	0.556374	0.556374	0.147875	0.556374	0.556374	1	0.147875	0.556374	0.556374	0.147875	0.556374	0.147875	0.556374	0.556374	0.147875	0	1	0	1	1	0	0	0.556374	0.556374	0.147875
258	0.556374	0	1	1	0.556374	0	0	0.556374	0.556374	0.556374	1	0	0.147875	1	1	1	0.147875	0.556374	0.556374	0.147875	0.147875	0.556374	0.556374	1	1	0.556374	0.556374	0.556374	0.556374	0	0.556374	0.556374	0	0.147875	0.556374	0	0.147875	0.556374	0.556374	0.556374	0.556374	0.147875	0.147875	1	1	1	1	0.556374	1
259	0.556374	0.556374	0.147875	0.556374	0	0.556374	1	0.556374	0.556374	0.556374	0.556374	0	0.556374	1	1	0.147875	1	1	1	0.556374	0.556374	0.147875	0.556374	1	0.147875	1	0.556374	0.147875	1	0.147875	1	0	0	0	0.556374	0	0.556374	1	0.556374	1	0.556374	0	0	0	0	0	0.556374	0	0
260	0	1	0	1	0.556374	0	0.147875	0.556374	0.556374	0.147875	1	1	0.147875	1	0.556374	1	0.556374	0	1	1	1	1	0.556374	0	1	1	0.556374	1	0.556374	0.556374	0.147875	1	1	0.147875	1	0	1	1	0.556374	1	1	0.556374	0.556374	1	0	0.147875	0.556374	0.556374	1
261	1	0.556374	0.556374	0.556374	1	0	0.147875	1	0	1	0.556374	0	0.147875	0.556374	0	0	1	0	0.147875	1	0.556374	1	0.556374	0.556374	0.556374	0.556374	0	0	1	0	1	0.556374	0.556374	1	1	0	0.556374	1	0.556374	1	0.556374	0.556374	1	0.556374	0.556374	0.556374	0.556374	0	0
262	1	0.147875	0.556374	1	0.556374	0	0	1	0	0	0	0.556374	1	0.556374	0.556374	1	1	0.556374	0	1	0	0	1	0	0.556374	1	0	0	1	0	0.556374	0.556374	0.556374	0.556374	0.556374	0.556374	1	0.556374	0.556374	0.556374	0.556374	0.147875	0.556374	0.556374	0	0	0.556374	1	1
263	1	0.147875	0.556374	0.556374	0.556374	0	0	0.556374	0.556374	1	1	0	0	0	0	0.556374	0.556374	0	1	0.556374	0	1	0.147875	0.556374	0.556374	0.556374	1	0.147875	0.556374	1	1	0	1	0	0	0	0.556374	0.556374	0	0	1	0.556374	1	0.556374	0.556374	0.556374	0.556374	0	0
264	0.147875	0.556374	0.147875	0.147875	0.556374	0.147875	1	1	0.556374	0.556374	0.556374	0	0.147875	0.556374	0	1	1	0	1	0.556374	0.556374	0.556374	1	1	1	1	0.556374	1	1	0	0.556374	1	0.556374	0.556374	1	0	0	0.556374	1	1	1	1	0.147875	0.556374	0	0.556374	0.556374	0.556374	0.556374
265	1	0.556374	0.556374	0.556374	0.556374	0.147875	0.556374	0.556374	1	0	0	1	0	0	1	0.147875	1	0	0.556374	1	1	1	0.556374	0.556374	0.556374	0.556374	0.556374	0.147875	1	0.556374	0.556374	1	0	1	0.556374	0	0	0.147875	0.147875	0.556374	0.556374	0.556374	0.556374	0.556374	0.556374	1	0.556374	0.556374	0
266	0	1	1	1	1	0	1	0.556374	0.556374	0	0.147875	0.556374	0.556374	1	0	0	1	1	1	1	0.147875	0.556374	0.556374	0.147875	0.556374	0.556374	0.556374	0.556374	0.556374	0	1	1	0.147875	0.556374	0.556374	0.147875	0.556374	0.556374	0	1	1	0	0	0.556374	0.556374	1	0	1	0
267	1	1	0.556374	0.556374	0.556374	0	1	0.556374	0.556374	0.556374	1	1	1	0.556374	1	0.147875	1	0	0	0.147875	0.556374	0.556374	0.556374	0.556374	1	0.556374	0.556374	0	1	0	0	0.556374	1	1	1	0	1	0.556374	0.556374	0	1	0.147875	1	1	0	1	0.556374	0	0.556374
268	0.556374	0.556374	0.556374	0	1	0.556374	0.556374	0.556374	0	1	0	0	0.556374	1	1	0.147875	0.556374	0.556374	1	1	0.556374	0.556374	0.556374	1	0.147875	0.556374	0	0.147875	0.556374	1	0	0	0	0.556374	1	0.556374	0	1	1	1	0.556374	0.556374	0	0.556374	0.556374	0.556374	0.556374	0.556374	0.556374
269	0.556374	0.556374	0.556374	1	0.556374	0.556374	0.147875	1	0	0	1	1	1	1	0	1	0.556374	0.556374	0	1	0.556374	1	0.556374	0	1	0.556374	0.556374	0.556374	0.556374	0.556374	0.147875	1	0	0	0.556374	0.556374	1	0.556374	0.556374	0	1	0.556374	0.556374	1	0	1	0.556374	1	1
270	0.147875	1	0	0.556374	1	0	0	1	0	0	0.556374	0	1	1	0	0.147875	0.556374	0.556374	0	1	0.556374	0.556374	0.556374	0.147875	0.147875	0.556374	0.556374	0	1	0.556374	1	1	1	0	1	0	0	0.556374	0	0.556374	0.556374	0	0.147875	0.556374	0	0	1	0.147875	0.147875
271	1	1	0.147875	0.147875	1	0.147875	1	1	1	0.147875	1	0.556374	0.556374	1	0.556374	0	1	0.556374	0.556374	0	0.556374	0	0.556374	0.556374	0	1	0.556374	0	0.556374	0	0.147875	0.556374	1	1	0.556374	0.556374	0	1	1	1	0.556374	1	0.556374	1	0	0.556374	0.556374	0.147875	0.556374
272	1	0	0.147875	1	1	0	0	0.556374	0.556374	0.147875	1	0.556374	0.556374	0.556374	0	0.147875	0.556374	0.556374	0	0.147875	0.556374	0.556374	1	0.556374	0.556374	1	0	1	1	0.556374	1	1	0.147875	0.147875	0.556374	0.556374	1	0.556374	1	0.147875	1	0.147875	0.556374	0.556374	0.556374	0.556374	0.556374	1	1
273	1	1	0.556374	0.556374	1	1	0.147875	1	0	0.147875	0.556374	0.556374	0	1	0.556374	0	1	0.556374	1	0.147875	0.147875	0.556374	0.556374	0.556374	0.556374	1	0.556374	0	1	0.556374	0.556374	1	1	0.147875	1	0.556374	0	1	0.556374	1	1	0.556374	1	1	0.556374	0.556374	1	0.556374	0.556374
274	1	1	0.147875	0.147875	1	0.556374	0.147875	0.147875	0.556374	0.556374	0.556374	0.147875	0.556374	0.556374	0	0.556374	0.556374	0	0.556374	0.556374	1	1	1	0.556374	0.556374	1	0.556374	0.556374	1	0.556374	0.147875	0.556374	0	0.556374	0.556374	0.556374	0.556374	1	0.556374	0	0.556374	0.556374	1	1	1	0.556374	1	0.147875	0.556374
275	0.147875	0.556374	0.147875	0.556374	0.556374	0.556374	0.556374	0.147875	0.556374	1	0.556374	0.556374	1	1	1	0.147875	1	0.556374	0	1	0	0	0.556374	0.556374	0	1	0.556374	0.556374	1	0	0.147875	0	0.556374	1	1	0.556374	0.556374	1	0	1	1	0	0	1	0	0	0.556374	0.556374	1
276	1	1	0.147875	0.556374	0.556374	0	0	1	0.556374	0	0.147875	0.556374	0.556374	0.147875	0.556374	0.556374	0.147875	0.556374	0.556374	0.556374	0	0.556374	0.556374	0	0.556374	0.556374	0.556374	1	0	0.556374	1	0.556374	0.147875	0.556374	0.556374	0	0.556374	0.556374	0.556374	1	0.556374	1	1	0	1	0.147875	1	0.147875	0.556374
277	0	0.556374	1	1	0.556374	0.556374	0	0.556374	0	0.556374	0.556374	0	0.147875	0.556374	1	1	0.556374	0	0.556374	0.556374	0	0.556374	0.147875	0.556374	1	1	0	0	0.556374	1	0.556374	0.556374	1	0	1	0.147875	0	0.556374	0.556374	1	1	0	1	1	0	1	1	0.556374	0.556374
278	1	1	0.556374	1	0.556374	0	0.556374	1	0	1	1	0.556374	1	0.556374	0.556374	1	1	1	0.556374	0.556374	1	1	0.556374	1	0.556374	0.556374	0.556374	1	1	0.556374	0.147875	0.556374	1	0	0.556374	0	0	0	0	0	0.556374	1	1	1	0	0.147875	0.556374	1	0.556374
279	0.556374	0	0.556374	1	1	1	0.556374	0.556374	0.556374	0.556374	0.556374	1	0.556374	1	0	0.556374	0	1	0.556374	1	0.556374	0.556374	1	0.147875	1	1	0.556374	0.556374	0.556374	0	0	1	1	1	1	0.556374	0	1	1	1	1	0.556374	0	1	1	1	0	1	0
280	1	1	1	0.147875	0.147875	0.556374	0.556374	1	0.556374	0.556374	0.147875	1	1	1	0.556374	1	1	0.556374	0	0.147875	0.556374	1	1	1	1	0.147875	1	0.556374	1	0.556374	0	0.556374	0.556374	1	1	1	0	1	0.556374	0	1	1	0.556374	0.556374	0.556374	1	0.147875	1	1
281	0	0.556374	0.556374	0.556374	0	0	1	1	1	0.556374	0.556374	0.556374	0	1	1	0	1	1	1	1	1	0	0	0.147875	0	1	0.556374	1	1	1	1	1	0.556374	0	1	1	1	1	1	0.556374	1	1	0.556374	0.147875	0.556374	1	1	1	1
282	0.556374	1	1	1	0	0	1	0.556374	1	1	1	0	1	1	0.556374	0	0.556374	0.556374	0	0.556374	1	0.556374	0.556374	1	0.556374	1	0.556374	0.556374	0.147875	0.556374	0.556374	0.147875	1	0.556374	0	0.147875	0.556374	0.556374	1	0.556374	0	1	0.556374	0	1	0.556374	0.556374	1	0.556374
283	0	0.556374	0.556374	0.147875	0.556374	1	0.147875	1	0.556374	0.556374	0.556374	0.556374	0	0.556374	0.556374	0	0.556374	0	0.147875	0.147875	0.556374	0	0	1	0.556374	0.556374	0.556374	0.556374	0.556374	1	0.147875	1	0.556374	0	0.147875	0.556374	0.556374	0.147875	0.556374	0.556374	0	0.556374	0	0.556374	0.556374	0	0.147875	0.556374	0
284	0.556374	0.556374	1	0.556374	0.556374	0	0.556374	0.556374	0	0.556374	0.556374	0.556374	0	0.556374	0.556374	0.147875	0.556374	0.556374	0	0.556374	0	0.556374	0.556374	0.556374	0.147875	0.556374	0	0.556374	0.556374	0.556374	0.556374	0.556374	1	0	0.556374	0.556374	0	0	1	0.556374	0.147875	0.556374	0	0.556374	0.556374	0	0.147875	1	0
285	0.147875	0	0.556374	0	0.556374	1	0.556374	0.556374	0.556374	0.556374	0.147875	1	0	0.556374	0	0.556374	0.556374	0.556374	0.556374	0.556374	0.556374	0	0.556374	0.556374	0.556374	0.556374	0.556374	0	1	0.556374	0	0.556374	1	0.556374	0.556374	0.556374	0.556374	0.556374	0.556374	1	0.556374	1	0.147875	0.556374	0.556374	0	0.556374	0	0.556374
286	0.556374	0.556374	0.556374	0	0.147875	0.556374	0	0.556374	0.556374	0.556374	0.147875	0	0.556374	0.556374	0.556374	0.556374	0.556374	0	0.147875	0.556374	0.556374	0.556374	0.147875	0.556374	1	1	0.556374	0.556374	0.147875	1	0.556374	0	1	0	0.556374	0.556374	0	0.556374	0.556374	1	1	0.556374	0.556374	0.556374	0	0.556374	0.556374	0.556374	0.556374
287	0.556374	1	0.556374	0.556374	1	1	0.147875	0.147875	0.556374	0	0.147875	0.556374	0	0.556374	0	1	0.556374	1	0.556374	0.556374	0.556374	0	0	0.556374	0.556374	0.556374	1	1	0.556374	1	1	0.556374	0.147875	0.556374	0.147875	0.556374	0.556374	0.556374	1	0	0.556374	1	0	1	0.556374	1	1	0.556374	0
288	0.556374	0	0.147875	1	0.556374	1	0	1	0.556374	0.147875	1	1	0.556374	0	1	1	1	0.556374	0.147875	0.556374	0.556374	0	1	1	0.147875	0.556374	0.556374	0.556374	0.556374	1	0	0.147875	0.556374	0.556374	0	1	1	1	1	0	0.556374	0.147875	0.556374	0.556374	1	0	0.556374	0.556374	0.556374
289	0	0.147875	0.556374	1	1	1	0.556374	0.147875	1	0.556374	0.556374	0.556374	0	0.556374	0.147875	1	1	0.556374	0.556374	1	1	0.556374	0.556374	0.147875	0.556374	0.556374	0	1	1	0	0.556374	0.556374	0.556374	0	0.556374	0.556374	1	1	1	0.556374	0	0.556374	0.556374	1	0.556374	0	0.556374	0.147875	1
290	1	0.556374	1	1	1	1	0	1	0.556374	0	0	1	1	0.147875	0.556374	0.556374	0	1	0	0	1	0.147875	0.556374	0.556374	0.556374	0.147875	0.556374	0.556374	0.147875	0.556374	1	0.556374	1	0.147875	0.556374	0.556374	0.556374	1	1	0.556374	0.556374	1	0.556374	1	0.556374	0	0.556374	1	0
291	0	1	1	0.147875	0.556374	0.556374	0	0.556374	1	0.556374	0.556374	1	0.556374	1	1	0.556374	0.556374	0	0.556374	0	1	0	1	0.556374	0	0.556374	1	0.556374	0.556374	1	0.556374	1	0	0	0.556374	0	1	1	1	1	1	0.147875	1	0.147875	1	1	1	0.147875	0.556374
292	0.556374	0.556374	1	1	0.556374	0	0.556374	1	0.556374	1	0.556374	1	0.556374	0.556374	0	0.556374	0.556374	0.556374	0.556374	0.556374	0	0.556374	0.147875	0	1	1	1	0.556374	1	1	1	0.556374	1	1	0.556374	0	0	0.556374	0.556374	1	0.556374	0	0.556374	1	0	1	0.147875	1	1
293	0.556374	0.556374	0.556374	0	0	0.556374	0.556374	0	1	0	0.556374	1	0.556374	0.556374	1	1	1	0	0	1	0.556374	0.556374	1	0.556374	0	0.556374	0.147875	0.556374	1	0.556374	1	0.556374	0.147875	0.147875	1	0.556374	0.556374	0.556374	0.556374	0.556374	0.556374	1	0	0.556374	0.556374	0.556374	0.556374	0.556374	0
294	1	1	1	0.147875	0.556374	1	1	1	1	0.147875	0.147875	0.556374	0	1	0.556374	0.556374	0.556374	1	0.147875	0.147875	0.556374	1	1	0.147875	0	0.556374	1	0.556374	0	1	1	1	0.556374	1	0.147875	1	0.556374	1	1	0.556374	0.556374	0.556374	0.556374	0.556374	0.556374	0	0.556374	0.556374	0.556374
295	0.556374	0.147875	1	0	1	0.556374	0	0.556374	1	0.556374	1	0.556374	0	1	0.556374	0.556374	0.556374	0.147875	1	1	0.556374	0	0	0.147875	0	0.556374	0.556374	1	1	1	0	0.556374	0.147875	0.556374	1	1	0.556374	0.556374	0.556374	0.556374	0.556374	0.556374	0	0.556374	0.556374	0	0	0.556374	0
296	0	0.556374	0.556374	0.556374	1	0.556374	1	0.147875	0.556374	1	1	1	0.556374	0.556374	0.556374	0.556374	0.147875	0.556374	1	1	1	0.147875	1	0	0.147875	0.147875	1	0.556374	0.556374	0.147875	1	1	0.556374	1	0.556374	1	0	0.556374	0.147875	0	0.147875	1	1	0.147875	1	1	0.556374	1	1
297	0	0.556374	0	1	1	0.556374	0.556374	0.556374	0.556374	0.556374	0.556374	1	0.147875	0.147875	0.556374	0.556374	1	0.147875	0	0.556374	0.556374	0	1	0.556374	0	1	0	0	0.147875	0.556374	0.556374	1	0	0.147875	1	1	0	0.556374	0.556374	0.556374	0.556374	0	1	0	0	0	1	0.556374	0
298	0.147875	0.147875	0.556374	1	1	0.556374	0.147875	0	0.556374	1	1	0.556374	0.556374	1	0.556374	0	1	0.556374	0.556374	0.147875	1	0	0	1	1	1	1	0	0	0.147875	1	0.556374	0.147875	0.556374	0.556374	1	0	0	0.556374	1	1	0.556374	0	1	1	0.556374	0.147875	0.556374	0.556374
299	0.556374	0	1	0.556374	0.556374	1	0.556374	0.147875	1	0.147875	0.556374	0.556374	0.556374	0.147875	0.556374	0	0.147875	0.556374	0	0	0.556374	0.556374	0	0.556374	0	0.556374	0.556374	0	0.556374	0.556374	0	0.556374	0.147875	0.556374	0	0.556374	0	0.556374	1	0.556374	1	1	0	0.556374	0	0.556374	1	0.556374	0.556374
300	1	0.556374	0.147875	0.556374	0	0.556374	0	0.556374	0.556374	0.147875	1	0	0.556374	0.556374	0	0.556374	1	0.556374	0	0.556374	0	0.556374	0.147875	0.556374	1	1	0.556374	0.556374	0.556374	0.556374	0.556374	0.556374	0.556374	0	0.556374	1	0.556374	0.147875	0.556374	0.556374	0.556374	0.556374	0.556374	0	1	0.556374	0.556374	1	0.556374
301	1	1	0.556374	0.556374	0.556374	0.556374	0	0.556374	1	0.556374	0.556374	1	0.556374	0	0.556374	0.147875	0.147875	1	0.556374	0.556374	1	0.556374	0.147875	0.147875	0.147875	0.556374	0.556374	0.556374	0.147875	1	0.556374	0.556374	0.556374	1	0.147875	1	0.556374	0.556374	0.556374	0.556374	1	0.556374	1	0.556374	1	0.556374	0.147875	1	0
302	0	0.556374	1	0.556374	0.147875	0.556374	1	1	0.556374	1	0.556374	1	0.556374	0.556374	0	0.556374	1	0.556374	0	0.147875	1	0.556374	0.556374	0.556374	0.556374	0.556374	1	0.147875	1	1	1	1	0.556374	0	0	1	0.556374	0.556374	0	0	0	1	1	0.147875	0.556374	0.556374	0	0	1
303	1	0.556374	1	0.556374	0.556374	1	0.556374	1	0.556374	0.147875	0.147875	0.147875	0	0.556374	0.556374	0.556374	0.556374	0.147875	0.556374	0.556374	0.556374	0.556374	0.556374	0.556374	0	1	0.147875	0.556374	1	1	0	0	1	0.556374	0.556374	0.556374	0.556374	0.556374	1	0.147875	0.147875	1	0.556374	0.556374	1	0.556374	1	0.556374	0.556374
304	0.147875	0.556374	0.556374	0.556374	0.556374	0	1	1	0	0	1	0	0.556374	1	0.556374	0.147875	0.147875	1	0.556374	0	1	0.556374	0.556374	0.556374	1	0	0.556374	0.556374	0.556374	0.556374	1	0.556374	0.556374	1	0.556374	1	1	0.556374	0.556374	0.556374	0.147875	0	0	0	0.556374	0.556374	0.556374	1	0.556374
305	0.556374	1	1	1	0.147875	0.556374	0.556374	1	0	0.556374	0.556374	0	0	0.556374	0.556374	1	0.556374	0.556374	0.147875	1	0.147875	1	1	1	0.147875	0.556374	0	0.556374	0.556374	0	0.147875	1	0.556374	1	0.556374	0	0.556374	0.147875	0	0	0.556374	0	1	1	0	0.147875	0.556374	1	0.556374
306	1	0.556374	1	0.147875	0.556374	1	1	0.556374	0	1	0.556374	0	0.556374	0.556374	0.147875	0.147875	1	0.556374	0.556374	0.556374	0.147875	0.556374	0.556374	0.147875	1	1	0.556374	0.556374	0.556374	0	0.556374	1	0.556374	1	0.556374	0.556374	0.556374	1	0.556374	1	1	0.556374	0.556374	0.556374	0.556374	0.556374	0.556374	0	0
307	1	1	0.147875	1	0.556374	0.556374	1	1	0	0.556374	1	0.556374	1	0.556374	0	0.147875	0.556374	1	0.556374	1	0	0.556374	0	0.556374	0	1	0.556374	0.556374	0.556374	0.556374	0.556374	0.556374	0	0.556374	0.556374	0	0.556374	0	0.556374	0.147875	0.556374	0.556374	1	0.556374	1	1	1	0	0.556374
308	0	0	0	0.556374	0.556374	0.556374	0.147875	1	0.556374	0	0.556374	0.556374	0	0	0.556374	0	1	0	0.556374	0.556374	0.556374	0.556374	0	0.556374	0	1	0.556374	0.556374	0	0.556374	0.556374	0.556374	0.147875	1	0.556374	0.556374	0.147875	0.556374	1	1	0	1	0.147875	1	1	0	0.147875	0.556374	0
309	1	1	1	0.556374	0.147875	0.556374	1	0	0	0.556374	0.556374	0	0.556374	0.556374	1	0.147875	0.556374	0	0.556374	0	0	0.556374	0.556374	0.147875	0.556374	0.556374	1	0.556374	1	0.147875	0.556374	0	1	1	1	0.556374	0.556374	0.556374	0	0.556374	0.556374	0.556374	0.556374	1	0.556374	0.147875	0.556374	0	0.147875
310	1	1	0	0.556374	0.556374	1	0.556374	1	1	0.556374	0.147875	1	0	1	0.556374	0.556374	0	0.147875	0.556374	0.556374	1	0	0	0.556374	0.556374	1	0.556374	1	0.556374	0.147875	0.147875	0.147875	1	0.556374	1	1	0.556374	0.147875	0.556374	0.556374	0.147875	1	1	0.556374	0	0.147875	1	0.556374	0.556374
311	0.556374	0.556374	0.147875	1	1	0	0.147875	1	0.556374	0.556374	0.556374	0	1	0.556374	0.556374	1	0.556374	0.147875	0.556374	1	0.556374	0.556374	0	0.556374	0.147875	0.556374	0.556374	0.556374	1	0.556374	1	0.556374	0.147875	1	0.556374	0	0.556374	1	0.556374	1	0	0.556374	1	0.556374	0.556374	0.556374	0.556374	0.556374	0.556374
312	0.556374	0.556374	0.556374	0.147875	0.556374	0	0.147875	0.556374	0.556374	0.147875	0.556374	0.556374	0.556374	0.556374	0	0	1	0	0	0.556374	0	0.556374	0.147875	1	1	0.556374	1	1	1	0.556374	0	0.556374	0	1	0.556374	0.556374	0	0	0.556374	1	0	0	0.556374	1	0.556374	0.556374	1	0.556374	0.556374
313	1	0.147875	0.556374	0.556374	0	0.147875	1	1	0	0	1	0.556374	0.147875	1	0.556374	0.556374	1	0	0.147875	0.556374	0.556374	0.556374	1	0	1	0.556374	1	0.556374	1	0.556374	0.556374	0.556374	1	1	0.556374	0	0.556374	1	0.556374	0	1	0.556374	1	0.556374	1	1	0.556374	0	0.556374
314	1	1	0.556374	0.147875	0.556374	0.556374	0	1	0.556374	0	1	1	1	1	0.556374	0.556374	1	0	0.556374	1	0	0.147875	0.556374	0	1	0.556374	0.556374	0.147875	0.556374	0.556374	0	1	0	1	0.556374	0.556374	0.556374	0.556374	0	1	1	1	1	0.556374	0	0	1	0.556374	0.556374
315	0.556374	0.556374	0.556374	0.556374	1	0.556374	0.147875	0.556374	0.556374	0.556374	0.556374	0	0.147875	0	0.147875	0.147875	1	0.556374	1	0.556374	0.556374	1	1	0	0	0	0.556374	0.147875	0.556374	1	0.556374	1	0.556374	0.556374	0.556374	0.556374	0.556374	0.556374	0	0.556374	1	0	0.147875	1	0	0.556374	1	0.556374	0.556374
316	1	0.556374	0.147875	0.556374	0.556374	0.556374	0.556374	0	0.556374	1	1	0.556374	0.556374	0.556374	0.147875	0.556374	0.556374	0	0.556374	1	0	0.556374	0.556374	0.556374	0.556374	0	0.556374	1	0.556374	0.556374	0.556374	0.556374	0.556374	0.556374	1	0	0.147875	1	0.556374	0.556374	0.556374	0	0.556374	0.556374	0	0.147875	1	0.556374	0.556374
317	0.556374	0.556374	0	0.147875	0.556374	0.556374	1	0	1	1	0.147875	0.556374	0.556374	1	0.556374	0	1	0	0	0.556374	0	0.556374	0	0	0.556374	0.556374	0.556374	0.147875	0.556374	0.556374	1	0.556374	0.556374	0	1	0	1	0.556374	0	0.556374	1	1	0	1	0	0.147875	0.556374	0	1
318	0	0.556374	0.556374	1	0.556374	0.556374	0	0.556374	0	0.147875	0.556374	0	0	1	0	0.556374	0.147875	0.556374	0.556374	0.556374	0	1	0.556374	0.556374	0	1	1	1	0.556374	0.556374	0.556374	0.556374	0.556374	0	1	0.556374	0.556374	0.556374	0	0.556374	0.556374	1	0.556374	1	1	0.556374	1	0	1
319	0.147875	1	0.147875	0.556374	1	0.556374	0.147875	0.556374	0.147875	1	0.556374	0	0.556374	1	1	0.147875	1	0.556374	0	0.556374	0.147875	0.147875	0	0.556374	0.556374	0.556374	0.556374	1	0	0.556374	0.556374	0	0.147875	1	0	0.556374	0.556374	1	0.556374	1	0.556374	0	0	0	1	0.147875	1	1	1
320	0	0	0.556374	0	0	0.556374	0.556374	0.556374	1	1	1	1	0.556374	1	0.556374	0.556374	1	0.556374	0.556374	1	0	0.556374	0.147875	1	0	0.556374	1	0	0.147875	1	0.556374	0	0.556374	1	1	1	0.556374	0.556374	1	0	0	0.556374	0.556374	1	1	0	0.147875	1	0.556374
321	0	0.556374	0.556374	0.556374	0.556374	1	0.556374	1	0	0.556374	0.556374	1	0.556374	0.556374	0.556374	0.556374	0	1	0	1	0.556374	0	0.147875	0.556374	0.556374	0.556374	1	0	0	0.147875	0.556374	0.147875	1	1	1	1	0	0	0.556374	0.556374	1	0	0	0	1	1	0	1	0
322	0.556374	1	0.556374	0.556374	0.147875	0.556374	0	0.147875	0.556374	0.556374	0.556374	1	0	0	0.556374	1	1	0.556374	0.556374	0.556374	0.556374	0	1	0.556374	0.556374	0.556374	1	0	0	0.147875	1	0.556374	1	0.556374	0.556374	0.556374	0	0.556374	1	0	0.556374	0.556374	0.556374	1	0.556374	0.147875	0.556374	0	0
323	1	1	0.556374	0	0.556374	0	0.556374	0.556374	1	1	1	0.556374	0.556374	0.147875	0.556374	1	1	0.556374	0.556374	0.556374	0.556374	0	0.556374	0.556374	0	0.556374	1	1	0.556374	1	1	1	1	0.556374	0.147875	1	1	1	1	1	0.147875	0.556374	0	0.556374	1	0	0.556374	0.556374	0
324	0	0.556374	0.556374	1	0.556374	1	0.556374	0	0.556374	0.147875	0.556374	1	0.556374	0.556374	0	0.147875	0.556374	1	0.556374	0.556374	0.556374	0.556374	1	0.556374	0	0.556374	0.556374	0.556374	0.147875	1	0.147875	0.147875	0.556374	0.556374	0.556374	0	0	0.556374	0.556374	1	1	0	0.556374	0.556374	0	0.147875	0.147875	0.556374	0.147875
325	0	0.556374	1	0.556374	0.556374	1	0	1	0	0.147875	1	0.556374	0	1	0.556374	0	0.147875	1	0	1	1	0.556374	1	0	0	0	0.556374	0	0.147875	1	0	0.556374	0.556374	1	1	1	0	1	0.556374	0	1	0.556374	0.556374	1	1	0	0	0	0.556374
326	0	0.147875	0.147875	0.556374	0.556374	0.556374	0.147875	0.147875	1	0.556374	1	1	1	0.147875	0.147875	1	0.147875	0.556374	0.556374	0.556374	0	1	0	0.556374	0.556374	0.556374	0.147875	1	1	1	1	0	0.556374	0.556374	0.556374	0.147875	1	0	1	0.556374	0	0.556374	0.556374	1	1	0.556374	0.556374	0.556374	0.556374
327	0.556374	0.556374	0.556374	1	0	0.556374	0.556374	1	1	0	0	0.556374	0.147875	0.147875	1	0.556374	0.556374	0.556374	0	0	0	1	1	0.147875	1	1	1	1	1	1	0.556374	1	1	1	0	0.556374	1	1	1	1	0	0.556374	0.556374	0.556374	0.556374	0.556374	0	0	1
328	0.556374	0.556374	0.556374	0.147875	0	0.147875	0.556374	0	0.556374	1	0	0	0.556374	0.556374	0.147875	0.556374	0.147875	1	0.556374	0.556374	0.556374	0.556374	0.556374	0.556374	0.556374	1	0	1	0	0.556374	1	0.556374	0.556374	0	0	1	0	0.147875	0.556374	0	0	0.147875	0	1	0.556374	0.147875	0.556374	0.556374	0.556374
329	0.556374	0.556374	0.556374	0	0	0.147875	1	0.556374	1	0.556374	1	1	0.556374	0.556374	0.147875	0.556374	0.147875	0.147875	1	0.556374	0	0.556374	1	0.556374	0.147875	0.556374	0.556374	0.556374	0.556374	0.556374	0.556374	0	0.147875	0.556374	0	0.147875	1	1	0.556374	1	0.556374	0.147875	0.556374	0.556374	0.556374	0.147875	0.556374	1	1
330	0.556374	0.556374	1	0.556374	0.556374	0.556374	0.556374	0	0.556374	0.147875	1	1	0.556374	0.556374	1	0.556374	0	0.147875	1	0.556374	0	1	0.556374	0.556374	0.147875	1	1	0.556374	1	0.147875	1	0.147875	0.556374	0.556374	0.556374	0	1	0	0.147875	0.556374	0.556374	0.556374	0.556374	0	0.556374	0	0.147875	1	1
331	0.556374	1	1	0.556374	0.556374	1	0.556374	0.556374	0.556374	0.556374	0	0.556374	0.556374	0.556374	0.147875	1	0.556374	1	1	1	1	0	0	1	1	0.147875	0.556374	1	0.147875	0.147875	0.556374	1	0.556374	1	0.556374	0.147875	0.556374	0.556374	0.556374	0.556374	0	0.556374	0.556374	0	1	1	0.556374	0	1
332	1	0	1	1	1	0	0	0.147875	1	1	0	0.556374	0.556374	0.556374	0.556374	1	0.556374	0	1	0.556374	0	0.556374	0.147875	1	1	0	1	1	0.556374	0.556374	1	1	0.556374	1	0	0.556374	0.556374	1	1	1	0	0.556374	1	0	1	0	1	1	0.556374
333	1	0	0.556374	0.556374	0.556374	0.556374	1	0.556374	1	0.556374	0.556374	0.147875	0.147875	0.556374	1	0.556374	0	0.556374	1	0	0	0.556374	0.556374	0.556374	0.147875	0.556374	1	0.556374	0.556374	0.556374	0.556374	0.556374	0	0	1	0.556374	0	0	1	0	0.556374	1	1	0.556374	1	0.556374	1	0	0
334	0.147875	0.147875	1	0.556374	1	0.556374	0.147875	0.147875	0.556374	1	1	0.556374	1	1	1	1	1	0.556374	0.556374	0.147875	0.556374	0	0.556374	0.556374	0	0.556374	0	0	0.556374	0	0	0.556374	0.147875	1	0.147875	1	0	1	0.556374	0.147875	0.556374	1	0	0.556374	0.556374	0.556374	0	0	0.556374
335	1	1	1	0.147875	0.556374	0.556374	0	0.556374	1	0	1	0	0.556374	0	0.147875	0.556374	0.147875	0.556374	0.147875	1	0.556374	0	0.556374	0.556374	0	0	0	0	0.556374	0.147875	1	1	1	0.556374	1	1	1	0.556374	1	0	0.556374	1	0	0.147875	0.556374	0.556374	0.147875	0.556374	0.556374
336	0	0.556374	0	0.147875	0.556374	0	0.556374	1	0.556374	0	0.147875	1	0	0.556374	0.556374	1	1	0.556374	0.556374	0.556374	0.556374	0.147875	0.556374	0.556374	0.147875	1	0.556374	0	0	0.556374	1	1	0.556374	0.147875	0.556374	0.556374	0.556374	0.556374	1	0.556374	0.556374	1	1	1	0.556374	0.556374	0	0	0.556374
337	0.147875	0.556374	0.556374	0.556374	0.147875	1	0.556374	0	0.147875	1	0.556374	1	0	0	0.556374	0	0.556374	0.556374	1	0.556374	1	0.147875	1	0.556374	0	0.556374	0.556374	1	0	0	1	1	0	0	0	0.556374	0	0.556374	0.556374	1	0	0.147875	0.556374	0.556374	0.556374	0	0	0.556374	0
338	0.147875	0.556374	0.556374	0.147875	0.147875	0.556374	0.556374	0.147875	1	0.556374	0.556374	0.556374	1	0.147875	0	0	1	1	0	0	1	0.556374	1	0	0	1	1	0.556374	0.147875	0.556374	1	1	1	0.556374	0.556374	1	0	0	1	0	0.147875	1	0.147875	0.556374	0.556374	0	0	0.556374	0.556374
339	0.556374	0.556374	0.556374	0	0	0.556374	0.556374	0.147875	1	0.556374	1	1	0	1	1	0.556374	0.147875	0.556374	0.556374	0.147875	1	0.556374	1	0.556374	0	0.147875	1	0.556374	0.147875	0.556374	0	0.556374	1	0	0.556374	0.556374	0.556374	0.556374	0.556374	0.147875	0.556374	0	0.556374	0	0.147875	0.556374	1	0.556374	0
340	0.147875	1	1	0	0.556374	0.556374	0.556374	0.147875	1	0.556374	0.556374	0.556374	0.556374	0.147875	1	0.556374	1	0.556374	0	0	0.556374	0	0.147875	0.556374	0.556374	0.556374	1	0	0.556374	0.556374	0.556374	0.147875	0.556374	0	1	0.556374	0	0.556374	1	0.556374	1	1	0.556374	0.556374	0.556374	0	0.147875	0.556374	0
341	0	0.147875	0.556374	0	0	0.556374	0.556374	0.147875	1	0.556374	1	0.556374	0	0	0.556374	0.556374	0.556374	1	0	1	0.556374	1	0.147875	1	0.556374	0.556374	1	0.556374	0.556374	0.147875	0.556374	0.147875	1	0.556374	1	0.556374	0.556374	0.147875	1	0	1	1	1	1	0.556374	0.147875	1	0.556374	0
342	0	0	1	0	1	1	0.556374	0.556374	0.556374	1	0.147875	0.556374	0	1	1	1	0.147875	1	0.556374	0.556374	1	0.556374	0.556374	0.556374	0	0.556374	0.556374	0	0.556374	1	1	1	0.147875	0.556374	0	0.556374	0	0	1	0	0	0.556374	0.556374	0.147875	0.556374	0	0.556374	1	0.556374
343	0	0.556374	0.556374	0.147875	0.556374	1	1	1	1	0.556374	0	0.556374	0	0.556374	0.556374	0.556374	0	0.556374	0	1	1	0.147875	1	1	0	1	0.556374	0	0.147875	0.556374	0	0.556374	0	0.147875	0.556374	0.556374	0	0.556374	0	0	0.556374	0.147875	0.556374	0.556374	0.556374	1	1	0.556374	0.556374
344	1	0.147875	0.556374	0	0.556374	0.147875	1	0.556374	1	0.556374	1	0.556374	0.556374	0	0.556374	1	0	0	0	0.147875	1	0.556374	0.556374	0.556374	0	0.556374	0.556374	0	1	0.556374	0	0.556374	1	0	0	0.556374	0	1	0	0	0	0.556374	1	0.556374	1	0	0.147875	1	1
345	0	0.556374	0.556374	1	0	0	0.556374	0.556374	1	0	0	0.556374	0	0.147875	0.556374	0	0	0	0.556374	0.147875	0.556374	0	1	0.556374	0.556374	0.556374	0.556374	0	1	0.556374	1	1	0.556374	0.556374	1	0.556374	0.147875	1	0.556374	0	0.556374	1	0.556374	0.556374	0.556374	0.556374	0.556374	0.147875	0.556374
346	0.556374	0.147875	0.556374	0.147875	0.556374	0.556374	0	0.556374	0.556374	1	1	0.556374	0.556374	1	0.556374	0	0.556374	1	0.556374	0.556374	0	0	1	0.147875	0.147875	0.556374	0.556374	0	0.556374	0.556374	1	0.556374	1	0.556374	1	0.556374	1	0.556374	1	0.147875	0.147875	0.556374	1	1	0	0.556374	0.556374	1	0.556374
347	0	0.556374	0.556374	0.556374	0.556374	1	0.556374	0	0.556374	0	0.556374	1	0	0	0	0.556374	0.556374	0.556374	0	0.147875	1	0.147875	0.147875	1	0.556374	1	0.147875	0	0	1	0	0.147875	0.556374	1	1	0.556374	0	1	1	0.556374	0.147875	0.556374	0	1	1	0	1	0	0.556374
348	1	1	0.556374	0.147875	1	1	0.556374	1	1	0.556374	0.556374	1	0	1	0.556374	0.556374	0.556374	0.556374	0	0.147875	1	0.556374	0	1	1	1	1	0.556374	1	0.556374	1	1	1	0.556374	0	1	0.556374	0.556374	1	0	0	0.147875	1	1	1	0.556374	0	1	0
349	1	1	0.556374	0.556374	0.556374	0.147875	0.556374	0.556374	1	0.147875	1	0.556374	0.556374	0.556374	0.556374	0.556374	0.147875	1	0.556374	0.556374	0	0.556374	1	0.556374	0	0.556374	1	0.556374	0.556374	0.556374	1	0.556374	1	1	1	0.556374	0	0.556374	1	0.556374	0.556374	0	0.556374	1	1	0	0.556374	1	1
350	0	1	0.147875	1	0.147875	0.556374	1	0.556374	0.147875	0.556374	0.556374	1	0	0.147875	1	0.556374	1	0.556374	0.147875	0.556374	0	0	0.147875	0	0.556374	1	0.556374	0	1	0.556374	0	0	0.147875	1	0.147875	1	0.556374	1	0	0.556374	1	0	0.147875	1	0	0.556374	0.147875	0.556374	0
351	0	0.556374	0.556374	0	0.556374	0.147875	1	1	1	1	0.147875	1	0.556374	0.556374	1	0.147875	1	1	0.556374	0.147875	1	0.556374	1	0.556374	0.556374	0.556374	1	0	0.556374	1	0	1	0.556374	0.556374	0.556374	0.556374	0	0.556374	0.556374	0.556374	0.556374	1	0.556374	1	0.556374	0.556374	0.556374	0.556374	1
352	0	1	0	0	1	0.147875	0	0	0.556374	0.556374	1	0.556374	0	0	0	0	0.556374	0.556374	0.556374	1	0.556374	0	1	1	0.556374	0.556374	0.147875	0	0.556374	0	0	1	0	0	1	1	0	0	0.556374	1	0	0.556374	1	0.556374	0	0.147875	1	1	0.147875
353	0.556374	0.556374	0	0.556374	0.556374	0.556374	1	0	0.147875	1	1	0.147875	1	1	0.556374	0.147875	0.556374	1	1	0.556374	1	0.147875	1	0.147875	0.147875	1	0.556374	1	0.147875	1	0.556374	1	0	0.556374	0.556374	0.147875	0.556374	0.556374	1	0.147875	1	0.556374	1	0.147875	0.556374	1	0.556374	0.556374	1
354	0.556374	1	0	0.556374	0.556374	0	0.147875	1	0.556374	1	0.556374	0	0	0.556374	0.556374	0	0.147875	0	0.556374	0.556374	1	1	1	0	0.556374	1	0.556374	0.556374	1	0.147875	1	0.556374	0	0.556374	0.556374	1	1	0.556374	1	1	0.556374	0.556374	0.556374	1	0.556374	0.556374	0.556374	0	0.556374
355	0.556374	0.556374	1	1	0.556374	1	1	0.147875	0.147875	0.147875	1	0.147875	0.556374	0	0.556374	0	1	0	0.147875	0	0.556374	0.147875	0.556374	1	0	0	0	0	0.556374	0.147875	1	1	0	0.556374	0.556374	1	1	1	1	0	0	0	0.556374	0.556374	0.556374	0.556374	1	0.556374	0
356	0.147875	0.147875	0.556374	0.147875	1	0.556374	0.556374	1	0.556374	1	0.556374	0	0.556374	1	0	0.556374	0.556374	0	0.556374	1	0.556374	1	0.556374	0	0.556374	0.556374	0	0.147875	1	0.556374	0	0.556374	0.556374	0	0.556374	0.556374	0	0.556374	0.556374	0.556374	0	0	1	0.147875	0.556374	1	1	0	0.147875
357	0	1	0.556374	0.556374	0.556374	1	0.556374	1	0.556374	1	1	0.556374	1	0	0.556374	0.147875	0.556374	0.147875	0.147875	1	0.556374	0.556374	0.556374	0.556374	0	0.556374	0.556374	1	0	0	0.147875	1	0.556374	1	0	0.556374	1	0.556374	0.147875	1	0.147875	0.147875	0.556374	0.556374	1	0.147875	1	1	0.556374
358	0.556374	0.147875	0.556374	1	0.556374	0.556374	0.556374	0.556374	0.556374	1	0.556374	0.556374	0.556374	1	0	0.556374	0.556374	0.556374	0.556374	1	0.556374	1	0.556374	1	0.147875	1	0.147875	0.147875	0.556374	1	0.556374	1	0.556374	0.147875	1	1	1	1	0	0	1	0	1	1	0	0.556374	0.556374	1	1
359	0.556374	0.556374	0	0	1	1	1	1	0.147875	0.147875	1	0.556374	0.556374	0.556374	0	0.556374	1	1	1	0.556374	0	0.556374	0.556374	0	0.556374	1	1	1	0.556374	1	0.556374	1	0.556374	0.556374	0	0.556374	0	0.556374	0	1	0.556374	0.556374	0.556374	1	0	1	1	0.556374	1
360	0.556374	1	1	1	0.556374	0	0.147875	1	0	1	0.556374	0.556374	0	1	1	0.556374	1	0.556374	0.556374	0	1	1	0.556374	0	1	1	1	0.147875	1	1	1	0.556374	1	1	0	0.556374	0.556374	0.556374	0.556374	0	1	0.556374	0.556374	0.556374	0.556374	0.147875	0.147875	1	0.556374
361	0.147875	0	0	0.147875	0.556374	0.556374	1	1	0.556374	1	0	0.556374	0	0.147875	0	0.556374	0.556374	0	0.556374	0.556374	0.556374	1	0.556374	0.556374	0.147875	1	0	1	0.556374	1	0.556374	1	0.147875	0.147875	0	1	0.556374	0.147875	0.556374	0.147875	0.556374	0.556374	0	0.147875	0.556374	0.556374	0.556374	0	0.556374
362	0	1	0	1	1	0.556374	0.556374	0.556374	0	0.147875	0.147875	0.556374	0.556374	0	1	1	1	0	0.147875	0.556374	0.147875	1	0.556374	0	0.147875	1	0.147875	0.556374	1	0.556374	0.556374	0.147875	0.556374	1	0	0.556374	0	0.147875	1	0.147875	0.556374	0	0.556374	0.556374	0.556374	0.147875	0.556374	1	1
363	0.147875	0.556374	0.556374	0	0.556374	1	0.556374	0	0	0.556374	0	0	1	0	0	0.147875	0.556374	1	0.556374	0.556374	0.556374	1	0	0	0.147875	1	0	0.556374	1	0	0.556374	0.556374	0.147875	0.556374	0.556374	1	1	1	1	0.556374	0.147875	0.556374	0.147875	0.556374	0.556374	1	0.556374	0.147875	1
364	0	1	0.556374	0.556374	0.556374	0	0.147875	1	0.556374	0.556374	0	0.556374	1	1	0	0.147875	1	0.556374	0.556374	1	0	0.147875	0.556374	0	0	0.556374	0.556374	1	0	1	1	0.556374	0	0	1	0.556374	0.556374	0	1	0.147875	0.556374	0	1	0.556374	0.556374	1	1	1	1
365	0.556374	0.556374	0	0.147875	0.556374	0	0	1	0	0.556374	1	0	0	1	0	0	0.556374	0	0	0.556374	0.556374	0.556374	0.147875	1	0.556374	0.147875	1	0.556374	1	0.556374	0.556374	1	0.147875	0.147875	0.556374	0.556374	0.147875	0.556374	0	0.556374	0.556374	0	0.556374	0.147875	0.147875	0.556374	0.556374	0.556374	0.147875
366	0.556374	1	0.556374	0.556374	0.556374	0	1	1	1	0	0	0	0.556374	0.556374	0	0	0	0.556374	0.556374	1	0.556374	1	0.556374	0.556374	0.556374	1	0	0.147875	1	1	1	1	0	0.556374	1	0.556374	0.556374	1	0	0.556374	1	0	0.556374	0.556374	0.556374	0.556374	1	0.556374	0.556374
367	1	1	0.556374	1	1	0	0.147875	0.556374	0.556374	0.147875	0.556374	0	0.147875	0.556374	1	0	1	0.556374	1	0.147875	0.147875	0.147875	1	0	0	1	1	0.147875	0	0.556374	1	0.556374	0	0	1	0	0	0.556374	1	1	1	0.556374	0.147875	0.556374	0	1	1	0.556374	0
368	1	1	0.556374	1	0.556374	0	0.556374	1	0.556374	0.556374	1	0	0.556374	0.556374	0	0	0.556374	0	0.556374	1	0.556374	1	0	0.556374	1	1	0	0.147875	0.556374	0	1	1	1	0	1	0.556374	0.556374	0.556374	0.556374	0	0.147875	0.147875	0.147875	1	0	0.556374	0.556374	0.556374	0.147875
369	0.556374	0.556374	0	1	1	0	0.556374	1	0.556374	0.556374	1	0	0	0.556374	0	0.147875	1	0.556374	1	0	0.556374	0.556374	0.556374	0	0.556374	1	1	1	0	1	0.556374	1	1	1	0	0.556374	0.556374	0.556374	1	1	1	0.556374	1	0.147875	0.556374	1	0.556374	0	0.556374
370	1	0.556374	0	0.556374	0	0.556374	0.556374	0.556374	0	1	0	0.556374	0.147875	0.556374	1	1	0.556374	0	1	1	0	1	1	0	0.556374	0.147875	0.147875	0.147875	1	0.556374	0.147875	0.556374	0	0.147875	1	0.556374	1	1	1	1	1	0.147875	1	0.556374	0.556374	0.147875	1	0.556374	0.556374
371	0.556374	0.556374	0.556374	0.556374	0.556374	0.556374	1	0.556374	1	1	0.556374	0.556374	0.147875	0.556374	0.556374	0.556374	1	0.556374	1	1	0.556374	0.556374	1	0.556374	0.556374	0.556374	0.147875	1	0.556374	0	0.556374	0.147875	0.556374	0.147875	1	0.556374	0.556374	0.556374	0.556374	1	0.556374	0	0.556374	1	0.556374	0.147875	0.556374	0.556374	0.147875
372	1	0.556374	0.556374	0.147875	0.556374	0.556374	0	0.147875	0.556374	0.556374	0.147875	0.556374	1	0.556374	0	0.556374	0.556374	0.556374	0.147875	1	0.556374	0.147875	1	0.556374	0.556374	0.556374	0.556374	0.147875	0.556374	0	0.556374	0	0.147875	1	0.556374	0.556374	0.556374	0.147875	0.556374	0.147875	1	0.556374	0	0.556374	0.556374	1	1	0	0.556374
373	0.556374	0	0.556374	0.556374	0.556374	0.147875	0.556374	0.556374	0.556374	0.556374	1	0.556374	1	1	0.556374	0.556374	0.556374	0.556374	1	1	0	0.556374	0.147875	0.147875	0.556374	0.556374	1	1	0.556374	0.556374	1	0.147875	0	0.147875	0.556374	0	0	1	0	0	1	1	0.147875	0.556374	0.556374	0.556374	1	0	1
374	0.556374	0.556374	0.556374	1	0.556374	0.556374	1	0.556374	0.556374	0.147875	0.556374	0.556374	1	1	0	0.556374	1	0	0.556374	1	1	0	0	0	1	1	0	0.556374	0	0	0.556374	1	0	0.147875	0.556374	0	0.556374	0.556374	0.556374	0.556374	1	0	0	0.556374	1	1	0.147875	0.556374	0.556374
375	0.147875	0.556374	0.147875	0.556374	1	0.556374	0	1	1	1	0.556374	1	1	0.556374	0.556374	0.147875	0.556374	0.147875	0.556374	0	0.556374	0	0.556374	0.556374	1	0.556374	0	1	1	0	1	0.556374	0.556374	0.556374	1	0.556374	1	1	0.556374	1	0.556374	0	0.556374	1	0	0.147875	1	0.556374	0.147875
376	0.556374	1	0	0.147875	0.556374	0	1	1	0.556374	0.147875	0.556374	0.556374	0.556374	0.147875	1	1	1	0.556374	0.556374	0.556374	0.556374	1	1	0.556374	1	0.556374	0	0.556374	1	0	0.556374	1	0.556374	0.556374	1	1	0.147875	1	0.556374	1	0.556374	0	0.556374	0.556374	0	1	1	0.556374	0
377	0	0	1	0.147875	0.556374	0	0.556374	0.556374	1	1	0.556374	0.556374	0.556374	0.147875	0	1	1	1	0.556374	1	0	1	0	0.556374	1	0.556374	0.556374	0.556374	1	0	0	0.556374	0.556374	0.556374	1	0	0.147875	0.556374	0	0.556374	0.556374	0.556374	0.147875	1	0.147875	0.556374	1	1	1
378	0.147875	1	0	1	0.556374	0	0.556374	1	0	0.556374	1	0.556374	0.556374	0.147875	0.556374	0	0.556374	0	1	0	1	0.147875	1	0	0.556374	0.556374	0.556374	1	0	0.556374	0.147875	1	0.556374	0.147875	1	1	0.556374	1	1	0.147875	0.556374	1	0.147875	1	0.556374	0.556374	0	0.556374	0.556374
379	0.147875	1	0.556374	1	1	0.556374	0	0.147875	0.556374	0	1	0.556374	1	0.556374	0.147875	0.556374	0	0.147875	1	1	0.556374	1	0.556374	0	0.556374	1	0.556374	0.147875	0.147875	0.556374	0	1	0.556374	1	0.556374	0.556374	0	1	0.556374	1	1	0.556374	0.147875	0.556374	0	0.556374	1	0	0.147875
380	1	1	0.556374	0.147875	0.556374	0.556374	0	1	0	0.556374	1	0.556374	0.556374	0	1	1	0.556374	0	0.556374	1	0	0	0.556374	0	1	0.556374	1	1	0.556374	0	0.556374	0	0	0.556374	0.556374	0.556374	1	0.556374	0.556374	1	0	0	1	0.556374	0	0.556374	0.556374	0.556374	1
381	0	0.556374	0.556374	0.147875	1	0.556374	0.556374	0.556374	0	0	0.556374	0.556374	1	0.556374	0.556374	0.147875	1	0.556374	1	0.556374	0	1	0	0.556374	0.556374	1	0.556374	0.556374	1	1	1	0.556374	0.556374	1	0.556374	0	0.556374	1	0.556374	1	0	0.556374	1	0.556374	1	0.556374	0.556374	0	0.147875
382	0.556374	1	0	0.556374	0.147875	0.556374	0	0.556374	0.556374	0.556374	0.556374	0.556374	1	1	0.556374	0.556374	0.147875	1	0	0.556374	0.556374	0.556374	0.556374	1	0	0.147875	1	0.556374	0	1	1	1	0.556374	0	0	0	0	0.556374	0.556374	0.147875	1	1	0.556374	1	0	0	0.147875	0.556374	0
383	0	1	0.556374	0.147875	0.556374	0.556374	0.556374	0.147875	1	0	0.556374	1	1	1	1	0.147875	0.556374	0.556374	0.556374	0.147875	1	0	0	1	0.556374	0.556374	0.556374	0.556374	0.556374	1	0.556374	0.556374	1	0.556374	1	0.556374	1	0.147875	1	0.556374	0	1	0	0.147875	0.556374	1	1	0	0
384	0.556374	1	1	0	0	0.556374	0.556374	0.147875	0.556374	0	0.556374	1	0.556374	0.556374	0.556374	1	1	1	0	0	1	0.556374	0.147875	0.556374	0.556374	0.147875	1	0.556374	0.556374	0.556374	0.556374	0.147875	0.556374	0.556374	0.556374	0.556374	0.556374	1	0.556374	0	0.556374	0.556374	0.556374	0.147875	0.556374	1	1	0.556374	0.556374
385	0	1	0	0	0.556374	0	0.556374	0.147875	0	0.556374	1	1	0.556374	0.556374	1	1	0.147875	1	0.556374	0.556374	0.556374	0.556374	0.556374	1	0	1	1	1	0.147875	0.556374	0	0.147875	0.556374	0.556374	0.147875	0.556374	1	0.147875	0.556374	1	0.147875	1	0	0.556374	0.556374	0.556374	0.147875	0.556374	1
386	0.556374	1	1	0	0.556374	0.556374	0.556374	0.556374	0.556374	0	1	1	0.556374	0.556374	0.147875	1	0	0	0.556374	1	1	1	1	1	0.147875	0.556374	0.556374	1	0.147875	0.556374	0.556374	1	0.556374	0	0.556374	0.556374	0.556374	1	1	1	1	1	1	0.147875	1	1	1	0.556374	0.556374
387	0.147875	0.556374	0.556374	0	0.147875	1	0.556374	0.147875	0.556374	0.556374	0.147875	1	1	1	0.556374	0.556374	0.556374	0.147875	0.556374	0.147875	1	0.147875	0.147875	1	0.556374	0	0.147875	0.556374	1	0.147875	0	1	1	1	0.556374	0.147875	0.556374	0.556374	1	0	0.556374	0.556374	0	1	0.556374	1	0.147875	1	0.556374
388	0.556374	0.147875	0.556374	1	1	0.556374	0.556374	0	0.556374	1	1	0.147875	0.556374	0.147875	0.556374	0	0	0.147875	0	0.556374	0.556374	0.147875	1	1	0.556374	0.556374	0.556374	0	0.147875	0	1	0.147875	1	0.556374	0.556374	0.556374	0.556374	1	0	0.147875	0	1	0	0.147875	1	0	0.556374	1	1
389	0.556374	0.556374	0.556374	0.556374	1	0.556374	0	0.556374	0	0.556374	1	0.556374	0.147875	1	0.556374	1	0	1	0	0	0.556374	0.556374	0.556374	0.147875	0.147875	0	0.556374	0.556374	0.556374	0.556374	0	0.556374	0.556374	1	0.556374	0.147875	1	1	1	1	0.556374	1	0	1	1	0.556374	0.147875	1	0
390	0.556374	0	1	0	0.147875	0.556374	1	0.147875	1	1	0.147875	1	1	0.147875	1	1	1	1	0	1	0.556374	0.556374	0	0.556374	1	1	1	0.556374	0.147875	0.556374	0.556374	0.556374	0.556374	0	0.556374	1	0.556374	1	1	0.556374	1	1	0	1	1	0	0.556374	0	0.556374
391	0.556374	1	0.556374	0.556374	0.556374	0.556374	0	1	0.556374	0.147875	0.556374	0.556374	0.556374	1	0.556374	1	1	0.556374	1	1	0.556374	0.556374	0.147875	0.556374	1	0.147875	1	0	1	0.556374	0	0	0.556374	0	0.147875	0.556374	0	0	0.556374	0.556374	0.556374	1	1	1	0.556374	0	0.556374	1	0
392	0	0.147875	1	0.147875	0	1	0	0.147875	0.556374	0	0.556374	0.556374	0.556374	1	0.556374	0	0.556374	0.556374	0.556374	0.556374	0.556374	1	1	0.556374	0.556374	0.147875	0.556374	0.556374	1	0.556374	1	1	0.556374	0.556374	0	0	1	0.556374	0	0	0.556374	0.556374	1	0.556374	0.556374	0.556374	1	1	0.556374
393	0	1	0.556374	1	0.556374	1	1	0.556374	1	0.556374	0.556374	1	1	0.147875	1	1	1	0.556374	0	0.556374	1	0	0.556374	0.556374	0.556374	0.556374	0.556374	0	0.556374	0.556374	0.556374	0.556374	0.556374	0.556374	1	0.556374	0.556374	1	1	0.556374	0	1	0	0.556374	0.556374	0.556374	0.556374	0.147875	1
394	0	1	1	0.556374	1	0.556374	0	0.556374	0.556374	0.556374	1	0.556374	1	0.556374	1	0	0.556374	0.556374	0.556374	0.147875	1	1	1	0.556374	0.556374	0.556374	1	0	0.556374	0.556374	0.556374	0.556374	1	1	0.556374	1	1	1	0.556374	0	1	0	1	1	0.556374	1	0.147875	0.556374	0.556374
395	0.147875	0.556374	0.556374	0	0.556374	1	0	0.556374	0.556374	0.556374	0.556374	0.556374	0.147875	1	1	0.556374	0	1	1	0.556374	1	0	0.556374	0.556374	0	0.556374	0.556374	1	1	0.556374	0	0.556374	0.556374	0.556374	0.556374	1	0	0.556374	0.556374	1	1	0.556374	1	1	0.556374	0.556374	1	1	0.556374
396	1	1	0.556374	0.147875	0.556374	0.556374	0	0	0.556374	0	0	0.556374	1	1	0	1	1	0.556374	1	0.556374	0.556374	1	0	0.556374	0.556374	1	0.556374	1	0.556374	0.556374	0.556374	1	0.556374	0.556374	1	0	1	1	0	1	0	0	1	0.556374	0.556374	0	0.556374	0.556374	1
397	0	0.556374	0.556374	1	0.556374	1	1	0.556374	0.556374	0.556374	1	0	0	0.556374	0	0	0	1	1	0.556374	0.556374	0.556374	0.147875	0.147875	0.147875	1	1	1	0	0.556374	0.556374	0.556374	0.556374	0.556374	1	0.556374	0	0.556374	0	0.556374	0	1	1	1	0.147875	0.556374	0.556374	0.147875	1
398	0.147875	1	0.556374	0.556374	0.147875	0.556374	0.147875	0.556374	0	0.556374	0.556374	1	0.556374	0.147875	0.556374	0	0.556374	0.556374	0.556374	0.556374	0	0.147875	0.556374	0	1	0.556374	0	0.556374	0	0	0.556374	1	1	0.556374	1	0.556374	1	1	0.556374	1	0.556374	0.556374	0.556374	0.556374	0.556374	0.556374	1	0.556374	0
399	0.556374	0.556374	0	0	0.556374	0.556374	1	0.556374	0	0.556374	0.556374	0.147875	0.147875	0.556374	0.556374	0.147875	0.556374	0	0.147875	0	1	0.556374	0	1	0.556374	0	0	1	1	0.147875	1	1	1	1	1	1	1	0.556374	1	1	0	0.556374	0.556374	0.556374	0	0.556374	0.556374	0	0
400	0.147875	1	1	1	1	0.556374	0.556374	0.556374	0	0.556374	0	1	1	0.556374	0	1	1	0.556374	0.556374	1	0.556374	0.556374	0.556374	0	1	1	0.556374	0	0.556374	0.556374	0.556374	1	0.147875	1	1	0	1	0.556374	1	1	0.556374	0	0.556374	0.556374	0	0.147875	0.556374	0.556374	0.556374
401	1	0.556374	0	0.556374	0.556374	0	0.556374	1	0.556374	0.147875	0.556374	0	0.556374	0	0.556374	0.556374	1	0.556374	0.556374	0.147875	1	1	1	0.556374	0.147875	0.556374	0.556374	0	1	0	0.556374	1	0.556374	0.556374	1	0	1	0.556374	0	0.556374	0.556374	0	0	0.556374	0	0.147875	0.556374	1	1
402	1	1	0.147875	0.556374	0.556374	0.556374	0.556374	1	0	0	0.556374	0	1	1	0.556374	0.556374	1	0	0.147875	1	0.556374	0.556374	0.556374	0.556374	0.556374	1	0.556374	0.556374	1	0	1	0.556374	0	1	0.556374	0.556374	0.147875	0.556374	0	0.147875	0.556374	1	1	0.556374	0.556374	0.556374	0.147875	1	0.147875
403	0.556374	0	0	1	1	0.556374	0.147875	1	0.556374	0.147875	0.556374	0.556374	0	0.147875	0	0.556374	1	0.556374	0.147875	0.556374	1	0	0	0	0.556374	0.556374	0	0.556374	0.556374	0.556374	1	0.556374	0.556374	0.556374	0	0.556374	0.556374	1	0.556374	0.556374	0.556374	0.556374	1	1	0	0.556374	1	0.556374	1
404	0	0.556374	1	1	0.556374	0	0.556374	1	1	1	0.556374	0.556374	0	0.556374	0	0.556374	0.556374	0.556374	0.147875	0.556374	0.556374	1	0.556374	0.147875	1	1	0	0.147875	0.556374	0.556374	0.556374	1	0.556374	0	1	1	0.556374	1	1	0.147875	1	1	0.147875	0.556374	1	0.556374	1	1	1
405	0	1	0	0.147875	1	0.556374	1	0.556374	0.556374	0.556374	0.556374	1	0.556374	1	0.556374	1	1	0	0.556374	0.556374	0.556374	0.556374	0.556374	1	0.556374	1	0.556374	0	1	0	0	0	0.556374	0	1	1	1	0.556374	0.556374	0.556374	0.556374	0	0.147875	0.556374	1	1	0.556374	0	0.556374
406	0.147875	0.147875	1	0.556374	1	1	1	1	1	0.556374	1	0	0.147875	0.556374	0.556374	1	1	0.556374	0.556374	0.556374	0	0	1	0.556374	0.147875	0.556374	0.147875	0.556374	1	1	1	0.556374	0.556374	1	1	0.556374	0.556374	0.556374	0.556374	1	1	0.556374	0.556374	1	0	0.147875	0.556374	0.556374	1
407	1	0.556374	0.556374	1	1	1	1	1	0	0.556374	1	0.556374	1	1	0.556374	0.147875	1	1	1	0.556374	0	0.147875	0.147875	0.556374	0.556374	1	0	0.147875	1	0.556374	0.556374	0.147875	1	1	0.147875	1	0.147875	0.556374	1	0	1	0.556374	1	0.147875	1	0	1	0	1
408	0.556374	1	1	1	0.556374	1	1	1	0.556374	1	0.556374	1	0.147875	1	0	0.556374	0.147875	0.556374	0.556374	1	0.556374	0.147875	1	0.556374	0.556374	0.556374	1	1	0.556374	1	0.556374	1	0.556374	0.556374	0.556374	0.556374	1	0.556374	0.556374	0.556374	1	0.556374	0.556374	0	1	1	0.556374	0.556374	0.147875
409	0.147875	0.556374	0.147875	0.556374	0	1	0.147875	0.556374	0.556374	1	0.556374	0	0.556374	0.556374	0	0	1	1	0.147875	1	1	0.556374	1	1	0.556374	1	0.556374	0.556374	0	0.147875	1	0.556374	1	0	1	0.556374	0.147875	1	1	0.556374	1	0	0	0	0	0.556374	0.556374	1	1
410	1	0.556374	1	0.556374	1	0	0	0.556374	0	0.556374	1	0	0.556374	0	0.556374	0.147875	1	1	0.147875	1	1	0.147875	0.556374	0.556374	1	0.556374	0.147875	1	1	0.147875	0.556374	0.147875	0.556374	0.556374	0.556374	0.556374	1	0.556374	0.556374	0	0.556374	0.556374	1	0.556374	1	0.147875	0	0	0.556374
411	1	0	0.147875	1	0.556374	0.556374	0.147875	1	0.556374	0.556374	0.556374	0	0.556374	1	0.556374	1	0	1	0.147875	0.147875	1	0.147875	1	0	0.556374	1	0.556374	0	0.556374	0.556374	1	1	1	0.556374	1	0	0.556374	0.147875	1	1	1	0	0.556374	0.556374	0.556374	0	0.556374	0	0
412	0	1	0.556374	0.556374	1	0.556374	0.556374	1	0.556374	0.556374	1	0	0	1	0.556374	1	1	1	0.556374	1	0	0.147875	1	0.556374	0.147875	0.556374	0.556374	0.147875	0.556374	0	0.556374	0.556374	0.147875	0.556374	0.147875	1	0.147875	0.556374	0.556374	0.556374	1	1	0.147875	0.556374	0.556374	0	1	0	0
413	0	1	1	0.556374	0.147875	0.147875	1	0.556374	0.556374	0.147875	1	0.556374	0.556374	0.556374	0.556374	1	0.556374	0.556374	0.556374	1	1	1	1	0	0.556374	1	1	1	1	0.556374	0	1	0	1	1	0	0.147875	0	0.556374	0.556374	0.556374	0.556374	0	1	1	1	1	0.556374	0
414	0.556374	1	1	1	0.556374	1	0.556374	1	0	0.556374	0.556374	0.556374	0.556374	0.556374	0.556374	0.556374	0.147875	0.556374	1	1	0.556374	0.556374	0	1	1	1	1	1	0.556374	0.556374	0.556374	1	0	0.556374	1	1	1	1	0	1	1	1	1	1	0	1	0.556374	1	0.147875
415	0	0.556374	0.556374	0	0.147875	0.556374	1	0.556374	0	0.556374	0.556374	0	1	1	0	0.556374	0	0.556374	0	1	0	0	1	0.556374	0.556374	0.556374	0.556374	0.556374	0.556374	0.556374	0	1	0	0	0.556374	1	1	0.556374	0	0.147875	0.556374	0.556374	0.556374	0.556374	1	0.556374	1	0	0.556374
416	0.556374	1	1	1	0	0.556374	1	1	0.556374	0.147875	1	1	0.556374	1	0	0	1	0	0	0	1	0.147875	0.556374	0	0.556374	1	0.556374	0	0.556374	1	0.556374	1	0	0.556374	0.556374	0.556374	0.556374	1	1	1	1	0	0.556374	0.556374	0.556374	1	0.556374	1	0.556374
417	1	0.556374	1	0.556374	1	0.556374	0.147875	0.556374	1	1	1	0.556374	0.556374	1	1	0.147875	0.556374	0.147875	1	1	1	0.147875	1	0.556374	0	1	0.556374	0	0.147875	0.147875	0.147875	0.556374	1	1	1	0.556374	1	0.556374	0.556374	0.556374	0.556374	0.556374	1	0.556374	0.556374	0.556374	1	1	1
418	0.556374	0.556374	0	0.556374	0.556374	0	1	1	0.556374	0.556374	1	0.556374	0	0.147875	1	0.556374	0.147875	0.147875	0	0.556374	0.556374	0.147875	0	0.147875	1	0.147875	0.556374	1	1	0.556374	0.556374	0.147875	0.556374	0.147875	0.556374	0.556374	0.556374	1	0.147875	0.147875	1	0.147875	0.556374	0.556374	0.556374	0.556374	0.556374	0	0
419	1	0.556374	0.556374	0.556374	0.147875	0.556374	0.556374	1	0.556374	1	0.556374	0.556374	1	1	1	1	1	1	1	1	0.556374	1	1	0	0	1	0	0	1	0	0	0.147875	0.556374	1	1	0.147875	0.556374	0.147875	0.556374	0	0.556374	0.556374	0.556374	1	0.556374	1	0.556374	1	1
420	1	1	1	0.556374	1	1	0.147875	0.556374	0	0.556374	1	0	0.556374	0.556374	0.556374	0.556374	0.556374	0	0	0.556374	0	0.556374	0	0	0.556374	0.556374	1	1	0.556374	1	0	0.556374	1	1	1	0.556374	1	1	1	0.556374	0	0	0.556374	0.556374	0.556374	1	1	1	1
421	1	0	0.556374	0.556374	0.147875	0.556374	0.556374	0.556374	0.556374	1	0.556374	1	0.556374	0.556374	0.556374	0.556374	1	0.556374	1	0.556374	1	1	0	0	0	0.556374	1	0	0.556374	1	0.556374	0.147875	0.556374	0.147875	1	0.556374	1	0.556374	0.556374	0.556374	0.147875	0.147875	0.556374	0.556374	0.147875	1	1	1	0.556374
422	0.556374	0	0.556374	0	1	1	0.556374	0.556374	0.556374	0.556374	0.556374	0.556374	1	0	0	0.556374	0.556374	1	1	1	1	0.556374	0.556374	1	1	0	0.556374	0	0.556374	0.556374	0.556374	1	1	0	0.147875	0.147875	0.556374	0	1	0.556374	0.147875	0.556374	0.556374	0.147875	0.556374	0.556374	1	0.556374	1
423	0.556374	0	0.556374	0.556374	0	0.147875	0.556374	0.556374	0.556374	0	1	1	0.556374	1	1	1	0.556374	1	0.556374	0.556374	0.556374	1	0.556374	1	0.556374	0	0.556374	1	0.556374	0.147875	1	0.556374	0.556374	0.556374	0	0.556374	0	0	1	1	1	1	0.147875	1	0.556374	1	0.556374	0	0.556374
424	1	0.556374	0.556374	0.556374	0.556374	0	1	0.556374	0	0.147875	0.556374	1	0.556374	0	0.556374	0.556374	0	0.556374	1	0.556374	0.556374	0.556374	0	1	0.556374	0.556374	0.556374	1	1	0.147875	1	0.556374	0.147875	0.556374	0	0.556374	0.556374	0.147875	0.556374	0.556374	0.556374	0.147875	0.556374	0.556374	1	0.556374	0	0.147875	0.556374
425	1	0.147875	0.556374	0.556374	1	1	0.556374	0.556374	1	0	1	0.147875	0.556374	0.556374	0.556374	1	0	0	0	0	1	0	0.556374	1	0.556374	1	0.556374	0.556374	0.556374	1	0	0.556374	0.556374	1	1	0	0	1	0.556374	0.147875	0.556374	0.556374	0	0.556374	1	0.556374	0.556374	1	0.556374
426	1	0.556374	0.556374	1	0.556374	0.556374	1	0	0	1	0.556374	0.556374	1	1	0	0	0.556374	0.147875	1	0.556374	0.556374	0.556374	0	0.556374	0	0.147875	0.556374	0.556374	0	1	1	0.556374	0.556374	0.556374	0.556374	0.147875	0	0	0.147875	0.556374	0	1	0.556374	0	0.556374	0.556374	0.556374	0.556374	0
427	0	0	0.147875	0.556374	0.556374	0.147875	0.556374	0	0.556374	0.556374	1	0.556374	1	0.556374	0.556374	0.556374	0	0.556374	0.556374	0.556374	1	1	0	1	0.556374	0	0	0.556374	0	0.556374	0	0	0.556374	0.147875	1	0.556374	1	0.556374	1	0.556374	0	0.147875	0.556374	1	0.556374	0	1	0.147875	1
428	1	0.556374	0.556374	0.556374	0.556374	1	0.556374	1	0.556374	1	0.556374	0.556374	0.556374	1	1	0.147875	0.556374	1	1	1	0.556374	0.147875	0.556374	1	1	1	1	0	0.147875	0.147875	1	0.556374	0.147875	0.556374	0.147875	1	1	0.147875	0.556374	1	0.147875	1	0.556374	0.147875	0.556374	0.147875	1	1	1
429	1	0.556374	0	1	1	1	1	0.556374	0.556374	0.556374	0.556374	1	1	0.556374	0	0	1	0.556374	0.147875	0.556374	0.556374	1	0.556374	0.556374	0.556374	0.556374	0.147875	0.147875	0.556374	1	0.556374	0.556374	0.556374	1	1	0.556374	0.556374	0	0.556374	0.556374	0.556374	0	0.556374	0	0	1	0	0	0.556374
430	0.147875	0.556374	0	1	1	1	0.556374	1	0	0.556374	0.556374	1	1	1	0.556374	0.556374	1	1	0.556374	1	0.556374	0.147875	0	0	0	0.556374	0.556374	0	1	0	0.556374	0.556374	0.147875	0.556374	0.556374	0.556374	0	1	0	1	1	0.556374	0.147875	0.556374	1	1	0	0.556374	0.556374
431	0.556374	0.147875	0.556374	0.556374	0.556374	1	1	1	0	0.556374	0.556374	1	0	1	1	0	0	0	0	1	0	0.147875	1	0.556374	0	0	0	0	1	0	0	1	0	0.147875	0.556374	1	1	0.556374	0	0	0.556374	0.556374	0.147875	1	0.147875	0.147875	1	1	1
432	1	1	1	0.556374	1	1	0.556374	1	0	0	1	1	0.556374	1	0	0	1	0	0	0.556374	1	0.556374	1	1	0	1	0.556374	0	1	0	0	1	0	0.556374	0.556374	0.556374	1	0.556374	0.556374	0.147875	0.556374	1	1	0.556374	0.556374	0.556374	0.556374	0.556374	0.556374
433	1	0.556374	1	0.556374	1	0.147875	1	1	1	0.556374	1	0	1	1	0	0	0.556374	0.556374	1	0.556374	0	0.556374	1	0	0	1	0.556374	0	0.556374	0.556374	0.556374	0.556374	0	0	1	1	0.556374	1	0.556374	0.556374	1	1	1	0.147875	0.556374	0.556374	1	0.556374	0
434	0	1	0.556374	0.556374	1	0	0	1	0	0.147875	0.556374	0.556374	0	1	0	0	1	0	0	1	0	0	1	0	0.147875	1	0.556374	0.147875	0.147875	0	0.556374	1	0.556374	1	1	0.556374	0	0	0.147875	1	1	0.556374	1	1	0	0	1	0	0
435	0.556374	1	0	0.556374	0.556374	0.147875	0.556374	0.556374	0	0	1	1	1	0.556374	0.147875	1	0.556374	1	0.147875	1	0.147875	0	1	0.556374	1	0.556374	0.556374	1	1	0	1	1	0	0.147875	0.556374	0	0	1	0	0	1	0	0	0.147875	0	0	1	0	0
436	0.556374	0.556374	0.147875	0.556374	0.556374	0.147875	0.556374	1	0	0	1	0	0	1	0	0.556374	1	0	0	1	0	0	1	0	0	0.147875	1	1	0	0.556374	0.556374	0.556374	0	0	0	0.556374	0.147875	1	0.147875	1	1	0	0	0.556374	0.556374	0.147875	1	1	0.147875
437	0.147875	1	0	0.147875	1	0	0.147875	1	0.147875	0.556374	1	0	0	1	0	0	1	0.556374	0.147875	0.556374	0.147875	0.556374	0.556374	1	1	1	0	0.556374	0	0	0	1	0	0	0	0.147875	0	0.556374	0	0	1	0.556374	0	0.556374	0	0.556374	0.147875	0.556374	0.556374
438	0	1	0	0.556374	1	0	0	1	1	1	1	1	1	1	0	0	1	0.556374	0.556374	0.556374	0	0	1	0	0.147875	1	0.556374	0.147875	1	0.147875	0.147875	1	0.556374	0.556374	0.556374	0.556374	0.556374	0.147875	0.147875	0.147875	1	1	0.147875	0.556374	1	0.147875	0.556374	0.147875	0.556374
439	0	0.147875	0	0	1	0	0	1	1	0	0	1	1	1	0	0	1	0	0	1	0	0.147875	1	1	0.556374	1	0.147875	0.147875	1	0	0.147875	1	0.556374	0	1	0	0	0.556374	1	1	1	0	0	1	0.556374	0.556374	1	0	0
440	0	0.556374	0.556374	0	1	0	0	1	1	0.556374	1	0	1	0.556374	0.147875	1	0.556374	0.556374	0.147875	1	0.556374	0.556374	0.556374	0	0.556374	1	0.556374	0	1	1	0.556374	1	0.556374	0.556374	0	0.147875	0.147875	0.556374	0.147875	0.147875	1	0	0	0.556374	1	0.556374	1	0.556374	0.147875
441	0.556374	0.556374	1	0.556374	1	1	0.556374	1	1	1	1	0	0.556374	1	0.556374	0.556374	1	0	1	0.556374	0	1	0.147875	0.556374	1	0	0.556374	0.147875	0.556374	0.556374	0.147875	1	0	0	1	0	0	0.556374	0.556374	0.556374	1	0.556374	0.147875	1	0.556374	0.147875	1	0	1
442	0.556374	0.147875	1	0.147875	0.556374	0	0.556374	1	0	0	1	0.147875	0	1	0	0.147875	1	0.556374	0.556374	0.556374	0.556374	1	0.556374	0.556374	0.147875	0.556374	1	1	0.556374	1	1	0.556374	0.147875	0.556374	0.556374	0	0.147875	0.556374	1	1	0.556374	0.147875	0.147875	0.556374	1	1	1	1	1
443	0.147875	0.556374	1	0.556374	0.147875	0.556374	0.556374	0.147875	1	0.147875	0.556374	0.556374	0.147875	1	0.556374	0.147875	0.556374	0	0.147875	0.556374	0.556374	0.147875	0.556374	1	1	0.147875	0.556374	0.556374	0.556374	0	0.147875	0.556374	0	0.556374	0.147875	0.147875	0.556374	0.147875	0.556374	0.147875	0.556374	0	0.556374	0.147875	0.147875	0.147875	1	0.556374	0.147875
444	0.556374	0.556374	0.556374	1	0.556374	0	0.556374	0.556374	0.556374	1	0.556374	1	1	1	0.556374	1	0.556374	0	0.556374	1	0	0.556374	1	0.556374	1	0.556374	1	1	0.556374	0.556374	0.556374	0.556374	0	0.556374	0.556374	0.556374	0.147875	1	0.556374	1	1	0.556374	0.147875	0.556374	0.556374	0.147875	0.556374	0	0.556374
445	0.556374	0.556374	0.556374	0.556374	0.556374	0.556374	0.147875	0.556374	0.556374	1	1	0.556374	0.556374	0.147875	1	0.556374	0.147875	0.556374	0.147875	0.556374	1	1	0.556374	0	0.556374	0.556374	0	0.556374	1	0.556374	0.556374	1	0	0.147875	0.556374	0.147875	1	0.556374	0.147875	0.556374	0.147875	0.556374	0.147875	1	0.147875	1	1	0.556374	0.556374
446	0.147875	0.556374	0	0.556374	0.147875	0.556374	0	1	0.556374	0.147875	1	0.556374	0.556374	1	0	0.147875	1	0.556374	0.147875	0.556374	0	0.147875	0.556374	0	0.556374	0.556374	0.556374	0.556374	0.556374	0.556374	1	0.556374	0	1	0.556374	0.556374	0	1	0.147875	1	0.556374	0.556374	0	1	0.556374	0.556374	0	0.556374	0.556374
447	1	0.556374	0	0	1	0	0.556374	1	0	0.556374	1	0	0.147875	0.147875	0.556374	0	1	0.147875	1	0.556374	0.147875	0.556374	0.556374	0	0.556374	1	0.556374	1	0.556374	0	0.147875	0.556374	0.556374	0	1	0.556374	0.556374	0.556374	0	1	1	0.556374	0	1	0	0.556374	0.556374	0.556374	1
448	1	0.556374	0.556374	1	0.556374	0.556374	0.556374	1	0	0	0.147875	0.556374	0.556374	0.556374	0.556374	0.147875	1	1	0.147875	1	0.556374	1	0.147875	0.556374	1	0.556374	0.556374	0.556374	1	0	1	0.556374	1	1	0.556374	0	0.147875	0.556374	1	1	0.556374	0.556374	0.556374	0	0.556374	0.556374	1	0.556374	1
449	1	0	0.556374	0.556374	0.147875	0.556374	0.556374	1	1	0.147875	1	1	1	0.556374	0	1	0.556374	0	0.556374	0.556374	1	1	0	1	0.147875	0.556374	0	0.556374	0	0.556374	0.556374	0	0	1	0.556374	0.556374	0.556374	0.556374	0	0.556374	0.556374	1	0.147875	0.147875	1	1	1	0	0.556374
450	0.147875	1	0.556374	0	1	1	1	0	0.147875	0.556374	0	0	0.556374	1	1	1	0.556374	0.556374	1	0.556374	0.556374	0.556374	0.147875	0.147875	0.556374	0	1	1	0.556374	0.556374	0.147875	0.556374	0.147875	0.556374	0	0	0.147875	1	0.556374	0.556374	1	0.556374	0.556374	1	0.556374	0.147875	1	0.556374	1
451	0.556374	0.147875	1	0.147875	1	0.556374	0.556374	0.556374	1	0.556374	1	0.556374	0.556374	0.556374	1	0.556374	1	1	0.147875	1	0.556374	0	1	0	0	0.556374	0.556374	0.147875	1	1	1	1	0.556374	0.147875	1	1	0.556374	1	1	0.556374	1	0.556374	0.147875	1	0	0	1	0	0.147875
452	0	0	0.147875	1	0.556374	0.556374	0.556374	1	0.556374	1	0.556374	0	0	1	1	1	1	0.556374	0	0	0.147875	0.147875	0.556374	0	0.556374	1	0.556374	1	1	0.556374	1	1	1	0.147875	0.556374	1	0.556374	0.147875	0.556374	0.147875	1	0	1	1	0.556374	1	0.147875	0.556374	0.556374
453	0.556374	0.556374	0.556374	0.556374	0.556374	1	0.556374	1	1	0.556374	1	1	0	1	0	1	0.556374	1	0.556374	0.147875	0.556374	0.147875	0.556374	0.147875	0.147875	1	1	1	0.556374	1	1	0.147875	1	0.556374	1	0.147875	1	1	1	1	1	1	0.556374	1	0.556374	0.556374	1	1	0.556374
454	0.556374	0.556374	0.556374	0.556374	0.556374	1	0.556374	1	0.147875	1	1	0	0.556374	1	0	1	1	0.556374	0.556374	1	0.147875	0.556374	1	0.556374	0.556374	1	0.147875	0.556374	1	1	0.556374	1	0	0	0.556374	0.556374	1	0.556374	0.556374	0.147875	1	1	1	1	0.556374	0.147875	1	0	0.556374
455	1	0.556374	0.147875	0.147875	1	0.556374	0.556374	0.556374	0	0	1	0.147875	0.147875	0.556374	0	1	1	0.556374	0.556374	0.147875	0.556374	0.556374	1	0	0	1	0	1	0	1	0.556374	1	0.556374	0	1	1	0.556374	1	0.556374	1	0.556374	0	0.147875	0.556374	0	1	1	0.556374	0.556374
456	1	0.556374	1	0.147875	0.556374	0.556374	0.556374	0	0	0.147875	1	1	0.556374	0	0.556374	1	0.556374	0.556374	0.147875	1	1	0.147875	1	0.556374	0.556374	0	0.147875	0.147875	1	1	0.556374	1	1	1	1	0.556374	0.556374	1	0.556374	1	0.556374	0.556374	0.556374	1	0.556374	0.556374	0	0	0.556374
457	0.556374	1	0	0.556374	0.556374	0	0.556374	0.556374	0.147875	1	1	1	1	0.147875	0.556374	0.556374	0.556374	0	0.556374	0.556374	0.556374	0.556374	1	1	1	0	0.556374	0.556374	0.556374	0.147875	0	0.556374	0.147875	0.556374	1	0	0.556374	0.556374	0	1	0.556374	0.556374	0.147875	0.556374	0.556374	1	0.556374	0.556374	0.556374
458	0.556374	1	0	0.556374	0.556374	0.556374	1	0.556374	0	0.556374	0.147875	0	0.556374	0.556374	1	1	0.556374	0.556374	0.556374	0.556374	0	1	0	0	0.147875	0.556374	0.556374	0.556374	1	0.556374	1	0.556374	0	0.556374	0	1	0.147875	1	0.556374	0.556374	0.556374	0	0.147875	0.556374	0	0.556374	0	1	1
459	0	1	0	0.556374	0	0.556374	0.556374	1	1	1	0.556374	0.556374	0.556374	0.147875	1	0.147875	0.556374	0.147875	1	1	0.556374	0.147875	0.556374	0.556374	0	1	0.556374	1	0	0.147875	1	0.147875	0.556374	0.556374	0.556374	1	0	0	0.147875	1	0.556374	0.556374	1	1	0	0	0.556374	0.556374	0.147875
460	0.147875	0.556374	0.147875	1	0.556374	0	1	0.556374	0	0	0	1	1	0.147875	1	1	1	0.556374	1	0.556374	1	1	1	0	0.147875	0.556374	0	1	1	0.147875	0.556374	0	0.556374	0.556374	0.556374	0	0	0.556374	0.556374	1	0.556374	1	1	1	1	0.556374	0.556374	1	1
461	1	0.556374	0.556374	0.556374	0.556374	0.556374	0.556374	1	0	0	0.556374	1	0.556374	0.556374	1	1	1	0.556374	0.556374	1	0.556374	0.556374	0	1	1	1	0.147875	0.556374	1	0.556374	0.147875	0.147875	0.556374	0	0.556374	0	0.147875	0.556374	0	1	1	0	0.147875	1	0.556374	0.556374	1	1	1
462	0.147875	1	0.147875	1	0.147875	1	0.556374	1	1	0.556374	1	0.556374	0	0	1	0.556374	0.556374	0	0	0	0.147875	1	0	1	0.556374	0.556374	0	0.556374	0.556374	0	1	0.556374	1	0.556374	0.556374	0	0.147875	0.556374	0.556374	0.147875	1	0.556374	0	0.556374	1	0.556374	0.556374	0.147875	0.556374
463	0	1	0.556374	0	1	0	1	1	0.556374	1	1	0.556374	0.556374	1	0.556374	0.147875	1	1	0	0	1	0.556374	1	0.556374	0	0	0.556374	1	1	1	1	0.147875	1	0.556374	1	1	1	0	0	0.556374	1	0	1	1	0.556374	0	0	0.556374	0.147875
464	0	0.147875	0.556374	0	1	0.147875	1	1	0.556374	0.147875	0.556374	0.556374	0	0	0.147875	0	1	0	0.556374	1	1	1	0	1	1	0	0	0	0	1	0.556374	1	0.556374	1	0.147875	0.556374	0.556374	1	0.556374	0	0	1	0.556374	1	0.556374	0.556374	0.556374	0.147875	0.147875
465	0.147875	0.556374	0	1	1	0	0.556374	0.556374	0	0	0.556374	0	0	0.556374	0.556374	0.556374	0.556374	1	0.556374	0.556374	0.556374	1	0.556374	0.556374	1	0	0.556374	0.556374	0.556374	0.556374	1	0.556374	1	0	1	0.556374	1	0.556374	0.556374	0.147875	0.556374	0	1	0.556374	0	0	0.556374	0.147875	0.556374
466	0.556374	0.556374	0.556374	0	1	0	0	0.556374	0	0.147875	0.556374	1	0	1	0.556374	0.147875	1	1	0.147875	1	0	0.147875	1	0	0.556374	1	0	0	0.556374	0	1	0.556374	0	1	1	0.556374	0.556374	0.147875	0	0.556374	0	1	0.556374	1	0.147875	0.556374	0.556374	1	0.556374
467	1	1	0	0.147875	0.556374	0.147875	0.147875	0.556374	0	1	0.556374	1	1	0.556374	0	0.147875	0.556374	0	0.556374	1	0.556374	0.147875	0.556374	1	1	1	0.556374	0	0.556374	0.556374	0.556374	0.556374	0	0.556374	0.556374	0	0	0	0.147875	0.556374	1	0.556374	0.556374	0	0	1	0.556374	0	0.556374
468	0	0.147875	0.147875	0.147875	0.556374	0	0.556374	0.556374	0.556374	0.556374	0	0.147875	0.556374	0	1	1	1	0.556374	0.556374	0.556374	0.556374	0.147875	1	0.556374	0.556374	0	0.556374	0	1	0	0.556374	0	0	0.556374	0.556374	0.556374	0.556374	0	1	0.147875	1	1	0.556374	1	0.556374	0.556374	0.556374	0.556374	1
469	0.556374	1	0	0.147875	1	0	0	0.556374	0	0	0.556374	1	0.556374	1	0	0.556374	0.147875	1	1	0.556374	0.147875	1	0.147875	0.556374	1	0.556374	0	0.556374	0.556374	0.147875	1	0.556374	0.147875	0.556374	1	1	1	0.556374	0.556374	0.556374	1	0	0.147875	0.556374	0.556374	0	1	0	0.556374
470	0.556374	0.556374	0	0	0.147875	1	0.147875	0.556374	0	0.556374	0	0	1	1	0.147875	1	0.556374	1	0.556374	1	1	0.556374	0.147875	0.556374	0	1	0.556374	0.556374	1	0.556374	0.556374	0.556374	0	0	1	0.147875	1	0.556374	0	0.556374	0	1	0.556374	1	0	0.147875	0.556374	0.556374	0.147875
471	0.556374	0	0.556374	0.556374	0.556374	0.147875	1	0.556374	0	0	1	0.556374	0.147875	0.556374	0.556374	1	0.556374	1	1	1	0.556374	0.556374	0.556374	0.556374	0.556374	0.147875	0.556374	0	0.556374	0	0	1	0	0.147875	1	0.556374	0.556374	0.556374	1	1	0.556374	0	0.556374	1	0.556374	0.556374	0.556374	0	0
472	1	0.556374	0.556374	0.556374	1	0.556374	0	1	1	0.147875	0.556374	0.556374	0.556374	0.556374	0.147875	0.147875	1	0.556374	0.147875	1	0	0.147875	0.556374	0.556374	1	0.556374	0.147875	1	0.556374	0.556374	1	1	0	0.556374	0.556374	0.556374	0	1	1	1	0.147875	1	1	1	1	0	1	0	0.556374
473	0.556374	1	1	0.556374	1	0	0.556374	0	0.556374	0.556374	0	0	0.147875	1	0.556374	0.556374	0	0.556374	0.556374	0.556374	1	1	1	0	0	0.556374	1	0.556374	1	0	0.556374	0.556374	0	0	1	0.556374	1	0	0	0.147875	1	0.556374	0.556374	0	1	1	0.556374	0.556374	1
474	1	0.556374	1	1	0	0.556374	0.556374	1	0.556374	0.556374	0	0.556374	0.556374	1	0.556374	1	0.556374	0	0	0.556374	0.556374	0.556374	1	0	0.556374	1	0	0	0.556374	0	1	1	0.556374	0.556374	0.556374	0.147875	1	0	0.556374	1	0	1	0.556374	0.147875	0.556374	0.556374	0.556374	0.147875	0.556374
475	0.556374	1	0	0.556374	1	0	0	0.556374	0	0.556374	0.556374	0	1	1	0	0.556374	0.147875	0.556374	0.556374	0.556374	0.556374	1	0.147875	0.147875	0.147875	1	0	0.147875	0.556374	0.556374	0.147875	1	0	1	0.556374	0	1	1	0	0	0.147875	1	0	0	0	0	1	1	0.556374
476	0.556374	0.556374	0.556374	1	0.556374	0.147875	1	0	0.556374	1	0.556374	1	0	1	0	0.556374	1	0.556374	1	0.556374	0.556374	0.556374	0.556374	0	0.556374	1	1	0.556374	1	0.556374	1	0.556374	0.147875	0.147875	0.556374	0	0	1	0.147875	0.556374	0	0.556374	0.147875	0.556374	0	0.556374	0.556374	0.556374	0.556374
477	1	0	0	0	1	0	0	0.556374	0	0	0.556374	0	0.147875	0.556374	1	0	1	0.556374	0.556374	1	0.556374	0.556374	0	0.556374	1	0.556374	0	0	1	1	0.147875	1	0.556374	1	0.556374	0.556374	0.147875	0.147875	0.556374	0.556374	0.556374	0	0.556374	0.556374	0.556374	0.556374	0.556374	1	0.556374
478	0.556374	0	0	0	1	0.556374	0.556374	1	0	0.556374	1	0.556374	0	0.556374	1	1	1	0	0.556374	1	0.556374	0.147875	0.556374	0.147875	1	1	1	0.556374	0.147875	0.556374	0.556374	0.556374	0	0.147875	0.556374	1	1	0.556374	0	0.556374	1	1	1	1	0.556374	1	1	0	0.556374
479	0.556374	0	1	0.556374	1	0.556374	0	1	1	0.556374	0.556374	1	0	1	0.556374	1	1	1	1	0.556374	0.147875	0.556374	1	1	1	1	0	0.147875	1	1	0.556374	1	0.556374	0.147875	1	1	1	0.556374	1	0	0.147875	0.147875	0.556374	0.556374	1	0.556374	1	1	0.556374
480	0.556374	0.556374	0.556374	0.556374	1	0.556374	0.556374	0.556374	0.556374	0.556374	0.556374	1	0	0.556374	1	0.556374	1	0.556374	1	1	0.556374	0.556374	0.556374	0	0.556374	1	0.556374	0.556374	1	0.147875	0.556374	1	0.556374	0.556374	0	0.147875	0.147875	0.556374	1	1	1	1	0.556374	0.556374	0.556374	0.556374	1	0.147875	0.147875
481	1	0	1	0.556374	1	0.556374	0.556374	0.556374	0.147875	0.556374	0	1	1	0.556374	0.556374	0.147875	0.556374	0.556374	0.556374	1	0.556374	1	0.556374	1	0.556374	1	0.556374	1	1	0	0.556374	1	0.556374	0.556374	0.556374	0.556374	1	0.556374	0.556374	1	0	0	0.556374	0	0	1	0	0.556374	0.556374
482	1	0.556374	0	1	0	0.147875	0.556374	0.556374	1	0.556374	0.556374	0.147875	0.556374	0.556374	1	0.556374	0.556374	1	1	0.147875	1	0.556374	0.556374	1	0	1	0.556374	0	0.556374	0.556374	1	0.556374	0.556374	1	0.556374	1	1	0.556374	0.556374	0.556374	1	0.556374	0.556374	1	0.556374	1	1	0.556374	1
483	1	1	0.556374	0.556374	0.556374	0.556374	1	0	0	0.147875	1	1	0.556374	1	0	0.556374	0.556374	0.556374	0.556374	1	0	0	0.556374	0.556374	0.147875	1	0	0.556374	1	1	1	1	0.556374	1	0.556374	0	0.556374	1	1	0.556374	1	1	1	1	0.147875	0.147875	1	0	0.556374
484	0.556374	0.556374	1	0.556374	1	0.556374	0.556374	0	0	0.556374	0.556374	0	0.556374	1	0.556374	0.556374	1	0.556374	0.556374	0.556374	0.556374	1	0.147875	1	1	1	0	0.556374	0	0.556374	0.556374	0	0	0.147875	0.556374	0.556374	1	0.556374	1	1	0.556374	1	1	0.556374	0.147875	1	0.147875	0.556374	0.556374
485	0.556374	0.556374	0.556374	0.556374	0.556374	0.147875	0.147875	0.556374	0.556374	0.147875	0.556374	1	0	0	0.147875	0.147875	0.556374	0.147875	0.556374	1	1	0	1	0	1	1	0.556374	0.556374	1	0	0.556374	0	1	0.556374	0.147875	0.556374	0.556374	0	0.556374	0	0.147875	0.147875	0.556374	0	0	0.147875	0	0	0.556374
486	0	1	0	0.556374	0.556374	0	0.556374	0.147875	0.147875	0.147875	0.556374	0	0.556374	0	1	1	1	0.556374	1	0.556374	0	0	0.556374	0.556374	0.556374	0	1	0.556374	1	0	0	1	0.556374	1	0.556374	0.147875	0.556374	0.556374	1	1	0.556374	0.556374	0	0.556374	0.556374	0.556374	0.556374	1	1
487	0.556374	1	0	0.556374	0.556374	0.556374	0.556374	1	0	0.147875	0.556374	0.556374	0.556374	0.556374	0	1	0.556374	0.556374	0	1	0.556374	0.556374	0	0	0.556374	0.556374	1	1	1	0.556374	0.556374	0.556374	0.556374	0.556374	1	0	0.556374	1	1	1	0	1	0.556374	1	0.556374	0.556374	1	1	1
488	0.147875	0.556374	1	0.556374	1	0	0.556374	1	0.556374	1	0.556374	0.147875	1	0.556374	0	0.556374	1	0.556374	0.556374	1	0	1	1	1	0.556374	1	1	1	1	1	0.147875	0.556374	0.556374	0.556374	0.556374	0.556374	0	1	0.147875	0.556374	1	0.147875	0.147875	1	1	1	1	0.556374	0.556374
489	1	1	1	0.556374	1	1	0.147875	0.556374	0.556374	0.147875	1	1	0.147875	1	0.556374	0	0.556374	0	0.556374	1	0	0.556374	1	0	0.556374	1	1	1	1	0.556374	1	0.556374	0.556374	1	0.556374	0.556374	0.556374	0.556374	0.556374	1	0.556374	1	1	1	0.556374	0	0.556374	1	0.556374
490	1	1	0.147875	1	1	0	0.556374	0.556374	1	1	0.556374	0	0.556374	0	0.556374	1	0	1	0.147875	0.556374	0.556374	0.556374	0	0.556374	0	0.556374	0	0.556374	0.556374	0	1	0.556374	0	0.556374	0	1	0.147875	0.556374	1	1	0.556374	0.556374	1	0.556374	0.556374	0.556374	0.147875	1	0.556374
491	1	0.556374	1	1	0.556374	0.556374	0.556374	0	0	0.556374	0.556374	0	0.556374	0.556374	1	0.556374	0	1	0.556374	1	0	1	1	0.556374	0	0	0.556374	0	0.147875	0.556374	0.556374	0.556374	0.556374	0.556374	0.556374	0.556374	0	0.556374	0.556374	0.556374	0.556374	0.556374	0	0.556374	0	1	1	1	0.556374
492	1	1	1	0.556374	0.556374	1	0	0.556374	0.556374	0.556374	0.556374	0.556374	0.556374	0.556374	0	0.556374	1	0.556374	0	0.556374	0.556374	0.556374	0.556374	0.556374	0.147875	0.556374	1	0.556374	0.556374	0.556374	1	0	1	0.556374	0.556374	0.556374	0.556374	0.556374	1	1	0.556374	1	0.147875	0.556374	1	0.556374	0.556374	1	0
493	0	0.556374	1	0.556374	0.556374	0.556374	1	0.556374	0.147875	0.556374	0.556374	0.556374	1	0.556374	1	0.556374	0	1	0.147875	0.556374	0.556374	0.556374	0	1	0	0.556374	0.556374	1	1	1	0.556374	1	0.556374	0	0.147875	1	0	0.147875	1	0.556374	0.147875	1	1	1	0.556374	0.556374	0.556374	0	0
494	0.556374	1	0	0.556374	0.556374	1	0	0.556374	0.556374	0	0.556374	0.556374	0	0.556374	0.556374	0.556374	0	0.556374	0.556374	0	0.556374	0.556374	1	0.556374	0.147875	1	0.556374	0	0.556374	0.556374	0	0.147875	0.556374	0	0.556374	0.556374	0.556374	0.556374	0.556374	0.556374	0	0.556374	0.556374	1	0.556374	1	1	0.556374	0
495	0.556374	0	0.556374	0	1	0	0.147875	0.556374	1	0.147875	0.556374	0.556374	0	0.556374	1	0.556374	0.556374	0.147875	0.556374	0.556374	0	0	0.556374	0.556374	0	1	0.556374	0.556374	0.556374	0.556374	0	0.556374	0.556374	0.556374	0	1	0.556374	1	0.556374	0	0.556374	1	0.556374	0.556374	0	0.147875	0.556374	0.556374	1
496	0.556374	0.556374	0	0	0	1	0.556374	1	1	1	1	1	0.556374	0.556374	0.556374	0	0.556374	0.556374	1	0.556374	0.147875	0.556374	0.556374	0	0.556374	0.556374	1	0	0.556374	1	1	1	0.556374	0	0.556374	0.147875	0.556374	0.556374	0.556374	0	0.556374	1	0.556374	0	0.556374	0.556374	1	0.556374	0
497	0	0.556374	1	1	1	0.556374	0	0.147875	1	0.556374	0	0.556374	0	0.556374	0.556374	0.556374	0	0.556374	0	0.147875	1	0	0.556374	0	1	1	0.556374	0.556374	0.556374	0.556374	0.556374	0	1	0	0.556374	1	1	1	0.556374	0.556374	0.556374	0.556374	0	0.556374	0.556374	0	0.147875	1	0.556374
498	0.556374	0.556374	0.556374	0.556374	0.556374	0	0	1	0.147875	0.556374	0.147875	0.556374	0	0.556374	0.556374	0.556374	0.556374	0	0	0.556374	1	0	1	0.556374	0.556374	0	1	0	0.556374	0.556374	0.556374	1	0.556374	0.556374	0.556374	0	0.556374	0.556374	1	0.556374	0	1	0.556374	1	0	0.556374	0.556374	0.556374	0
499	0.556374	0	0.556374	0.556374	1	1	0	0.556374	1	1	0.147875	0.556374	0.556374	0.147875	1	0.556374	0.556374	1	0.556374	0.556374	0.556374	1	0	0	0.556374	1	1	0.556374	1	1	0	0	0.556374	0.147875	1	0.556374	1	0	1	0.556374	1	0.556374	0.556374	0.147875	1	0.556374	0.147875	1	0.556374
500	0	0.147875	1	0.556374	0.147875	0.556374	0.556374	1	0	0	0.147875	1	0.556374	1	1	0.556374	0.147875	0.556374	0.556374	1	0.556374	0	0	1	0.556374	1	0.556374	1	0.147875	1	0.556374	1	0.556374	1	0	0	0.147875	0.147875	0.556374	0.556374	0.556374	0	1	0.556374	0.556374	0.147875	0.556374	0.147875	0.556374
501	0.147875	1	0.556374	0	0.556374	0.556374	1	1	0.556374	0.556374	0.556374	0.556374	1	0.556374	0	1	1	0.556374	1	0.147875	1	0.147875	1	1	1	1	1	0.556374	1	0.556374	0.147875	1	1	0.556374	0.556374	0.556374	0.147875	0.556374	0.556374	0.556374	0.556374	0.147875	0.556374	1	1	0	0.556374	0.556374	0.556374
502	0.556374	0.556374	1	0.556374	1	1	0.556374	0.556374	0.147875	0.556374	0	0	0.556374	1	0.556374	0.147875	0.556374	1	0.556374	0.556374	0.556374	0.556374	0.147875	1	0.556374	1	0.556374	0	1	0.556374	1	0.556374	0.556374	0.147875	0.147875	1	0	1	0.556374	0.556374	1	0.556374	0.556374	1	0.556374	0.556374	0.556374	0.556374	0.147875
503	0.556374	1	0.147875	0.556374	1	0.556374	0.147875	1	0.556374	0.556374	0.556374	0.556374	0.147875	0.556374	1	0.556374	0.556374	0	0.556374	0.147875	0.556374	1	0	0.147875	1	0.556374	1	0.556374	0.556374	1	1	0	1	0.556374	1	1	0.556374	0	0.556374	1	0.556374	0.556374	0.556374	1	0	0.147875	1	1	0
504	0.556374	0.556374	0.556374	0	1	0.556374	0.147875	1	0.147875	1	1	1	1	1	0.556374	1	0.556374	0.556374	0	0.556374	0	1	0	0.147875	1	1	0.556374	1	1	1	1	1	1	1	0	0.556374	0.556374	0.556374	1	1	0.147875	0.556374	1	0.147875	0.556374	0.556374	0.147875	0.556374	1
505	0.556374	0	0.556374	0.556374	0.147875	0.556374	1	1	0.556374	0.147875	1	0.147875	0.556374	0.556374	0.147875	0.556374	0.147875	0.556374	0.147875	0.147875	1	1	0.556374	0.556374	0.556374	0.556374	1	1	0	0.556374	1	1	1	0.556374	0.556374	0.556374	1	1	0.147875	1	1	1	1	1	0.147875	0.556374	1	0.556374	0.147875
506	1	0	0.556374	1	0.556374	1	0.556374	0.556374	1	0.556374	0.556374	0.556374	0.556374	0.556374	0.556374	0	1	0.556374	0.556374	0.556374	1	0.556374	1	0	1	0.556374	0.556374	0.147875	0.147875	0.147875	0.147875	0.556374	0.556374	0.147875	0.556374	0.147875	0.556374	1	0.147875	1	1	1	0.556374	0.147875	1	0.556374	0.556374	0	1
507	0.556374	1	0.556374	1	0.556374	0	0.556374	0	0.147875	0.556374	1	1	0.147875	1	1	0.147875	0.556374	1	1	0.556374	1	0	0	0.556374	0	0.556374	0	1	0	0.147875	1	1	1	1	1	0.147875	0.556374	1	1	1	0.147875	1	1	1	0	0.556374	0.556374	1	0.556374
508	1	0.556374	1	1	1	0.556374	1	0.556374	0.556374	1	0.556374	1	1	1	1	0.147875	0.556374	1	1	1	0.556374	0.556374	1	1	1	0.556374	1	0.147875	1	1	1	0.556374	1	0.147875	1	0.556374	1	0.147875	0.556374	0.556374	0.556374	1	1	1	0.556374	0.556374	1	0	0.147875
509	0.556374	0.556374	0.556374	1	0	1	1	0.556374	0	1	1	1	1	0.147875	0.556374	1	0.556374	1	0	0.556374	0.147875	1	1	1	1	0.147875	1	1	0.556374	1	0	0.556374	0.556374	0.556374	0.556374	0	1	0.556374	0.556374	1	0.556374	1	0.556374	0.147875	1	1	0.556374	1	1
510	1	1	0.556374	1	1	0.147875	0.147875	1	1	1	0.556374	1	1	0.556374	0.147875	0.556374	0	1	0.556374	0.556374	1	0.147875	0.556374	0.147875	0.556374	1	0.556374	0.556374	1	0.556374	1	0.556374	0	1	0.147875	1	1	0.556374	0	1	0.147875	0.556374	1	0.556374	1	1	1	1	1
511	1	1	1	0.556374	1	0.556374	1	1	1	1	0.147875	0.147875	0.556374	1	0.556374	0.556374	1	1	0.556374	0.556374	0	1	1	1	0.556374	0.556374	0.147875	0.556374	1	0.556374	1	1	1	0.556374	0	1	0.556374	1	0.556374	1	0.556374	0.147875	0.147875	1	0.556374	1	0	1	0.556374
512	0.556374	0.556374	0.147875	0.556374	0.556374	1	0	1	1	1	1	1	1	0.556374	1	1	0	0.147875	0.556374	0.556374	1	0.556374	1	0.556374	0	0.556374	0.556374	1	0.556374	1	0.556374	1	1	0	1	0.556374	1	0.556374	0.556374	0.556374	1	0.556374	0.556374	0.556374	0.556374	0.556374	0.556374	0.556374	0.556374
513	1	0.556374	1	1	1	0	0.556374	1	0.556374	0.556374	1	1	0	1	0.556374	0.556374	0.556374	0.556374	1	1	0.556374	1	0	1	1	0.556374	1	0.556374	0.556374	1	1	0.556374	0.556374	0.556374	0.556374	1	0	0.147875	0.556374	0.556374	0	0.556374	0.556374	1	0.556374	0.556374	1	0.147875	1
514	0.556374	0.556374	1	0.147875	1	0.556374	0.556374	0	0.556374	0	1	0	0	0.556374	0	0.147875	1	1	0.147875	0.556374	1	1	1	1	0.147875	1	0.556374	0.147875	0.556374	1	1	0.147875	0.147875	0.556374	1	0.147875	0.147875	0.147875	1	1	0.556374	0.556374	0.556374	0.556374	0	0	0.556374	0.556374	0
515	0.556374	1	0	0.556374	0	0.147875	0	0.556374	0.556374	1	1	1	1	1	0.556374	0.147875	1	0.556374	0	0	0.556374	0	1	0	1	1	0.556374	0	0.147875	1	0.556374	0	1	1	1	0.556374	0.556374	0.147875	0.556374	0	0.147875	1	0.556374	0	0.147875	1	1	1	0.556374
516	0.556374	1	1	1	0.147875	0.147875	0.556374	0	0.556374	0.556374	0.556374	0.556374	0	1	0.556374	0.556374	0.556374	0.556374	0.556374	0	0.147875	0.147875	0.556374	0.147875	1	0.147875	1	0	0	0.147875	0.556374	0	0	0.556374	0	1	0	0.556374	0.147875	1	1	1	0	0.556374	0	0.147875	1	1	0
517	0.556374	0.556374	0	1	1	1	0.556374	0.556374	1	0.556374	0.556374	0.556374	0.556374	0.556374	0.556374	0.147875	0	0.556374	0.147875	0.556374	1	1	0.556374	0.556374	1	0.556374	1	1	1	0.556374	0	1	1	0.556374	0.556374	1	0	0.556374	0.556374	0.556374	0.147875	1	1	0.147875	0.556374	0.147875	1	0.147875	1
518	1	1	0	1	0.556374	0	1	1	1	0.147875	1	1	1	1	1	1	1	0	1	1	1	1	1	0	0.556374	1	0.556374	0.147875	0	0.556374	0.556374	1	1	1	0.556374	0.147875	0.556374	1	0.147875	1	1	1	0.556374	1	1	0.556374	1	0.556374	1
519	0.556374	0.556374	0.556374	0.556374	0.556374	0.556374	1	0.556374	0.556374	0.556374	0.556374	0.147875	1	0	1	0	0.556374	0.556374	1	0	0.147875	1	0.556374	0	0.556374	0.556374	0.556374	1	0.556374	1	0.556374	1	1	1	1	0.556374	1	1	1	1	0.556374	1	0.147875	1	0.147875	1	0.556374	0.556374	0
[truncated: 303 more rows]
[truncated: 11 more columns]
