# Supplementary material for: SaPt-CNN-LSTM-AR-EA: a hybrid ensemble learning framework for time series-based multivariate DNA sequence prediction
Source: PeerJ journal article supplement (doi:10.7717/peerj.16192), 2023-10-04
Supplement: Supporting_Information.pdf [file Supporting_Information.pdf]

## Supporting Information

# SaPt-CNN-LSTM-AR-EA: A Hybrid Ensemble Learning Framework for Time Series-based Multivariate DNA Sequence Forecasting

Wu Yan<sup>1,2,3,\*</sup>, Li Tan<sup>4</sup>, Li Meng-shan<sup>4,\*</sup>, Sheng Sheng<sup>1,3</sup>, Wang Jun<sup>1,3</sup>, Wu Fu-an<sup>1,3,\*</sup>

<sup>1</sup>School of Biotechnology, Jiangsu University of Science and Technology, Zhenjiang 212018, Jiangsu, China

<sup>2</sup>School of Mathematics and Computer Science, Gannan Normal University, Ganzhou 341000, Jiangxi, China;

<sup>3</sup>Sericultural Research Institute, Chinese Academy of Agricultural Sciences, Zhenjiang 212018, Jiangsu, China

<sup>4</sup>College of Physics and Electronic Information, Gannan Normal University, Ganzhou Jiangxi 341000, China

Correspondence to: Wu Yan (wuyan@gnnu.edu.cn) and Wu Fu-an (fuan\_w@just.edu.cn)

# Supporting Information

## Supporting Information S1: Architecture

| ARFIMA   | p | d        | q |
|----------|---|----------|---|
| ARFIMA1  | 2 | 0.137242 | 1 |
| ARFIMA2  | 3 | 0.152319 | 3 |
| ARFIMA3  | 0 | 0.103217 | 2 |
| ARFIMA4  | 2 | 0.185938 | 1 |
| ARFIMA5  | 1 | 0.187463 | 3 |
| ARFIMA6  | 0 | 0.101779 | 1 |
| ARFIMA7  | 0 | 0.186444 | 1 |
| ARFIMA8  | 0 | 0.143275 | 3 |
| ARFIMA9  | 3 | 0.174638 | 1 |
| ARFIMA10 | 2 | 0.131683 | 3 |
| ARFIMA11 | 1 | 0.10419  | 3 |
| ARFIMA12 | 2 | 0.108895 | 2 |
| ARFIMA13 | 0 | 0.10396  | 2 |
| ARFIMA14 | 1 | 0.155748 | 3 |
| ARFIMA15 | 2 | 0.113858 | 1 |
| ARFIMA16 | 1 | 0.146806 | 3 |
| ARFIMA17 | 0 | 0.121165 | 1 |
| ARFIMA18 | 0 | 0.15631  | 2 |
| ARFIMA19 | 2 | 0.136411 | 2 |
| ARFIMA20 | 2 | 0.172277 | 2 |
| ARFIMA21 | 1 | 0.167329 | 3 |
| ARFIMA22 | 3 | 0.148079 | 3 |
| ARFIMA23 | 1 | 0.190846 | 1 |
| ARFIMA24 | 2 | 0.107327 | 3 |
| ARFIMA25 | 1 | 0.113248 | 1 |
| ARFIMA26 | 3 | 0.132143 | 3 |
| ARFIMA27 | 0 | 0.177813 | 2 |
| ARFIMA28 | 1 | 0.134341 | 3 |
| ARFIMA29 | 0 | 0.159218 | 3 |
| ARFIMA30 | 1 | 0.151746 | 3 |
| ARFIMA31 | 1 | 0.155939 | 2 |
| ARFIMA32 | 0 | 0.156593 | 1 |
| ARFIMA33 | 2 | 0.168306 | 3 |
| ARFIMA34 | 3 | 0.167236 | 2 |
| ARFIMA35 | 2 | 0.192527 | 2 |

|          |   |          |   |
|----------|---|----------|---|
| ARFIMA36 | 1 | 0.171254 | 3 |
| ARFIMA37 | 0 | 0.141862 | 2 |
| ARFIMA38 | 0 | 0.142844 | 1 |
| ARFIMA39 | 0 | 0.171919 | 2 |
| ARFIMA40 | 0 | 0.181297 | 2 |
| ARFIMA41 | 2 | 0.165743 | 3 |
| ARFIMA42 | 0 | 0.176136 | 3 |
| ARFIMA43 | 3 | 0.177283 | 2 |
| ARFIMA44 | 3 | 0.199419 | 2 |
| ARFIMA45 | 1 | 0.104194 | 2 |
| ARFIMA46 | 1 | 0.101288 | 2 |
| ARFIMA47 | 2 | 0.122954 | 3 |
| ARFIMA48 | 1 | 0.197995 | 1 |
| ARFIMA49 | 2 | 0.130782 | 3 |
| ARFIMA50 | 2 | 0.100007 | 3 |
| ARFIMA51 | 2 | 0.127975 | 1 |
| ARFIMA52 | 0 | 0.101963 | 2 |
| ARFIMA53 | 3 | 0.111993 | 1 |
| ARFIMA54 | 0 | 0.163274 | 3 |
| ARFIMA55 | 1 | 0.173693 | 3 |
| ARFIMA56 | 0 | 0.136911 | 1 |
| ARFIMA57 | 1 | 0.150498 | 1 |
| ARFIMA58 | 1 | 0.125376 | 3 |
| ARFIMA59 | 0 | 0.112295 | 3 |
| ARFIMA60 | 1 | 0.124829 | 3 |
| ARFIMA61 | 0 | 0.18392  | 2 |
| ARFIMA62 | 2 | 0.145758 | 2 |
| ARFIMA63 | 3 | 0.15851  | 3 |
| ARFIMA64 | 2 | 0.149439 | 3 |
| ARFIMA65 | 1 | 0.175515 | 3 |
| ARFIMA66 | 2 | 0.128742 | 1 |
| ARFIMA67 | 3 | 0.106382 | 3 |
| ARFIMA68 | 0 | 0.153435 | 1 |
| ARFIMA69 | 3 | 0.116646 | 2 |
| ARFIMA70 | 0 | 0.137962 | 1 |
| ARFIMA71 | 3 | 0.122051 | 1 |
| ARFIMA72 | 0 | 0.168472 | 3 |
| ARFIMA73 | 2 | 0.135285 | 2 |
| ARFIMA74 | 3 | 0.186815 | 3 |
| ARFIMA75 | 2 | 0.127495 | 3 |
| ARFIMA76 | 0 | 0.181889 | 1 |

## Supporting Information S2: parameters

|                |                              |
|----------------|------------------------------|
| input_size     | 50                           |
| hidden_size    | 32                           |
| output_size    | 10                           |
| num_layers     | 3                            |
| bias           | true                         |
| batch_first    | False                        |
| dropout        | 0                            |
| bidirectional  | false                        |
| binary_dim     | 8                            |
| largest_number | $2^{\text{binary\_dim}} - 1$ |
| alpha          | 0.1                          |
| input_dim      | 50                           |
| hidden_dim     | 32                           |
| output_dim     | 10                           |

## Supporting Information S3: Codes

```
% implementation of RNN
clc
clear
close all
%% training dataset generation
binary_dim = 8;
largest_number = 2^binary_dim-1;
binary = cell(largest_number,1);
int2binary = cell(largest_number,1);
for i = 1:largest_number+1
    binary{i} = dec2bin(i-1, 8);
    int2binary{i} = binary{i};
end
%% input variables
alpha = 0.1;
input_dim = 2;
hidden_dim = 16;
output_dim = 1;
%% initialize neural network weights
synapse_0 = 2*rand(input_dim,hidden_dim) - 1;
synapse_1 = 2*rand(hidden_dim,output_dim) - 1;
```

```

synapse_h = 2*rand(hidden_dim,hidden_dim) - 1;
synapse_0_update = zeros(size(synapse_0));
synapse_1_update = zeros(size(synapse_1));
synapse_h_update = zeros(size(synapse_h));
%% train logic
for j = 0:19999
% generate a simple addition problem (a + b = c)
a_int = randi(round(largest_number/2)); % int version
a = int2binary{a_int+1}; % binary encoding
b_int = randi(floor(largest_number/2)); % int version
b = int2binary{b_int+1}; % binary encoding
% true answer
c_int = a_int + b_int;
c = int2binary{c_int+1};
% where we'll store our best guess (binary encoded)
d = zeros(size(c));
if length(d)<8
pause;
end
overallError = 0;
layer_2_deltas = [];
layer_1_values = [];
layer_1_values = [layer_1_values; zeros(1, hidden_dim)];
for position = 0:binary_dim-1
% X -----> input
% synapse_0 -----> U_i
% layer_1_values(end, :) ---> previous hidden layer (S(t-1))
% synapse_h -----> W_i
% layer_1 -----> new hidden layer (S(t))
layer_1 = sigmoid(X*synapse_0 + layer_1_values(end, :)*synapse_h);
% layer_1 -----> hidden layer (S(t))
% output layer (new binary representation)
layer_2 = sigmoid(layer_1*synapse_1);
% did we miss?... if so, by how much?
layer_2_error = y - layer_2;
layer_2_deltas = [layer_2_deltas; layer_2_error*sigmoid_output_to_derivative(layer_2)];
overallError = overallError + abs(layer_2_error(1));
% decode estimate so we can print it out
d(binary_dim - position) = round(layer_2(1));
% store hidden layer so we can use it in the next timestep
layer_1_values = [layer_1_values; layer_1];
end
future_layer_1_delta = zeros(1, hidden_dim);
for position = 0:binary_dim-1

```

```

% a -> (operation) -> y, x_diff = derivative(x) * y_diff
X = [a(position+1)-'0' b(position+1)-'0'];
% prev_layer_1 -----> (S(t-1))
layer_1 = layer_1_values(end-position, :);
prev_layer_1 = layer_1_values(end-position-1, :);
% error at output layer
layer_2_delta = layer_2_deltas(end-position, :);
output ,
% error at hidden layer
layer_1_delta = (future_layer_1_delta*(synapse_h') + layer_2_delta*(synapse_1')) ...
.* sigmoid_output_to_derivative(layer_1);
% let's update all our weights so we can try again
synapse_1_update = synapse_1_update + (layer_1')*(layer_2_delta);
synapse_h_update = synapse_h_update + (prev_layer_1')*(layer_1_delta);
synapse_0_update = synapse_0_update + (X')*(layer_1_delta);
future_layer_1_delta = layer_1_delta;
end
synapse_0 = synapse_0 + synapse_0_update * alpha;
synapse_1 = synapse_1 + synapse_1_update * alpha;
synapse_h = synapse_h + synapse_h_update * alpha;
synapse_0_update = synapse_0_update * 0;
synapse_1_update = synapse_1_update * 0;
synapse_h_update = synapse_h_update * 0;
if(mod(j,1000) == 0)
err = sprintf('Error:%s\n', num2str(overallError)); fprintf(err);
d = bin2dec(num2str(d));
pred = sprintf('Pred:%s\n',dec2bin(d,8)); fprintf(pred);
Tru = sprintf('True:%s\n', num2str(c)); fprintf(Tru);
out = 0;
size(c)
sep = sprintf('-----\n'); fprintf(sep);
end
end

% implementation of LSTM
clc
clear
close all
%% training dataset generation
binary_dim = 8;
largest_number = 2^binary_dim - 1;
binary = cell(largest_number, 1);
for i = 1:largest_number + 1
binary{i} = dec2bin(i-1, binary_dim);

```

```

int2binary{i} = binary{i};
end
%% input variables
alpha = 0.1;
input_dim = 2;
hidden_dim = 32;
output_dim = 1;
%% initialize neural network weights
% in_gate = sigmoid(X(t) * U_i + H(t-1) * W_i) ----- (1)
U_i = 2 * rand(input_dim, hidden_dim) - 1;
W_i = 2 * rand(hidden_dim, hidden_dim) - 1;
U_i_update = zeros(size(U_i));
W_i_update = zeros(size(W_i));
% forget_gate = sigmoid(X(t) * U_f + H(t-1) * W_f) ----- (2)
U_f = 2 * rand(input_dim, hidden_dim) - 1;
W_f = 2 * rand(hidden_dim, hidden_dim) - 1;
U_f_update = zeros(size(U_f));
W_f_update = zeros(size(W_f));
% out_gate = sigmoid(X(t) * U_o + H(t-1) * W_o) ----- (3)
U_o = 2 * rand(input_dim, hidden_dim) - 1;
W_o = 2 * rand(hidden_dim, hidden_dim) - 1;
U_o_update = zeros(size(U_o));
W_o_update = zeros(size(W_o));
% g_gate = tanh(X(t) * U_g + H(t-1) * W_g) ----- (4)
U_g = 2 * rand(input_dim, hidden_dim) - 1;
W_g = 2 * rand(hidden_dim, hidden_dim) - 1;
U_g_update = zeros(size(U_g));
W_g_update = zeros(size(W_g));
out_para = 2 * rand(hidden_dim, output_dim) - 1;
out_para_update = zeros(size(out_para));
% C(t) = C(t-1) .* forget_gate + g_gate .* in_gate ----- (5)
% S(t) = tanh(C(t)) .* out_gate ----- (6)
% Out = sigmoid(S(t) * out_para) ----- (7)
% Note: Equations (1)-(6) are cores of LSTM in forward, and equation (7) is
% used to transfer hiddent layer to predicted output, i.e., the output layer.
% (Sometimes you can use softmax for equation (7))
%% train
iter = 99999; % training iterations
for j = 1:iter
% generate a simple addition problem (a + b = c)
a_int = randi(round(largest_number/2)); % int version
a = int2binary{a_int+1}; % binary encoding
b_int = randi(floor(largest_number/2)); % int version
b = int2binary{b_int+1}; % binary encoding

```

```

% true answer
c_int = a_int + b_int; % int version
c = int2binary{c_int+1}; % binary encoding
% where we'll store our best guess (binary encoded)
d = zeros(size(c));
if length(d)<8
pause;
end
% total error
overallError = 0;
% difference in output layer, i.e., (target - out)
output_deltas = [];
% values of hidden layer, i.e., S(t)
hidden_layer_values = [];
cell_gate_values = [];
% initialize S(0) as a zero-vector
hidden_layer_values = [hidden_layer_values; zeros(1, hidden_dim)];
cell_gate_values = [cell_gate_values; zeros(1, hidden_dim)];
% initialize memory gate
% hidden layer
H = [];
H = [H; zeros(1, hidden_dim)];
% cell gate
C = [];
C = [C; zeros(1, hidden_dim)];
% in gate
I = [];
% forget gate
F = [];
% out gate
O = [];
% g gate
G = [];
% start to process a sequence, i.e., a forward pass
% Note: the output of a LSTM cell is the hidden_layer, and you need to
% transfer it to predicted output
for position = 0:binary_dim-1
% X -----> input, size: 1 x input_dim
X = [a(binary_dim - position)-'0' b(binary_dim - position)-'0'];
% y -----> label, size: 1 x output_dim
y = [c(binary_dim - position)-'0'];
% use equations (1)-(7) in a forward pass. here we do not use bias
in_gate = sigmoid(X * U_i + H(end, :) * W_i); % equation (1)
forget_gate = sigmoid(X * U_f + H(end, :) * W_f); % equation (2)

```



```

out_gate = sigmoid(X * U_o + H(end, :) * W_o); % equation (3)
g_gate = tan_h(X * U_g + H(end, :) * W_g); % equation (4)
C_t = C(end, :) .* forget_gate + g_gate .* in_gate; % equation (5)
H_t = tan_h(C_t) .* out_gate; % equation (6)
% store these memory gates
I = [I; in_gate];
F = [F; forget_gate];
O = [O; out_gate];
G = [G; g_gate];
C = [C; C_t];
H = [H; H_t];
% compute predict output
pred_out = sigmoid(H_t * out_para);
% compute error in output layer
output_error = y - pred_out;
% compute difference in output layer using derivative
% output_diff = output_error * sigmoid_output_to_derivative(pred_out);
output_deltas = [output_deltas; output_error];
% compute total error
% note that if the size of pred_out or target is 1 x n or m x n,
% you should use other approach to compute error. here the dimension
% of pred_out is 1 x 1
overallError = overallError + abs(output_error(1));
% decode estimate so we can print it out
d(binary_dim - position) = round(pred_out);
end
% from the last LSTM cell, you need a initial hidden layer difference
future_H_diff = zeros(1, hidden_dim);
% stare back-propagation, i.e., a backward pass
% the goal is to compute differences and use them to update weights
% start from the last LSTM cell
for position = 0:binary_dim-1
X = [a(position+1)-'0' b(position+1)-'0'];
% hidden layer
H_t = H(end-position, :); % H(t)
% previous hidden layer
H_t_1 = H(end-position-1, :); % H(t-1)
C_t = C(end-position, :); % C(t)
C_t_1 = C(end-position-1, :); % C(t-1)
O_t = O(end-position, :);
F_t = F(end-position, :);
G_t = G(end-position, :);
I_t = I(end-position, :);
% output layer difference

```

```

output_diff = output_deltas(end-position, :);
% hidden layer difference
% note that here we consider one hidden layer is input to both
% output layer and next LSTM cell. Thus its difference also comes
% from two sources. In some other method, only one source is taken
% into consideration.
% use the equation:  $\delta(l) = (\delta(l+1) * W(l+1)) .* f'(z)$  to
% compute difference in previous layers. look for more about the
% proof at http://neuralnetworksanddeeplearning.com/chap2.html
%  $H\_t\_diff = (future\_H\_diff * (W\_i' + W\_o' + W\_f' + W\_g') + output\_diff * out\_para) \dots$ 
% .* sigmoid_output_to_derivative(H_t);
%  $H\_t\_diff = output\_diff * (out\_para') .* sigmoid\_output\_to\_derivative(H_t);$ 
H_t_diff = output_diff * (out_para') .* sigmoid_output_to_derivative(H_t);
%  $out\_para\_diff = output\_diff * (H_t) * sigmoid\_output\_to\_derivative(out\_para);$ 
out_para_diff = (H_t) * output_diff;
% out_gate difference
O_t_diff = H_t_diff .* tan_h(C_t) .* sigmoid_output_to_derivative(O_t);
% C_t difference
C_t_diff = H_t_diff .* O_t .* tan_h_output_to_derivative(C_t);
% % C(t-1) difference
%  $C\_t\_1\_diff = C\_t\_diff .* F_t;$ 
C_t_1_diff = C_t_diff .* F_t;
% forget_gate difference
F_t_diff = C_t_diff .* C_t_1 .* sigmoid_output_to_derivative(F_t);
% in_gate difference
I_t_diff = C_t_diff .* G_t .* sigmoid_output_to_derivative(I_t);
% g_gate difference
G_t_diff = C_t_diff .* I_t .* tan_h_output_to_derivative(G_t);
% differences of U_i and W_i
U_i_diff = X' * I_t_diff .* sigmoid_output_to_derivative(U_i);
W_i_diff = (H_t_1)' * I_t_diff .* sigmoid_output_to_derivative(W_i);
% differences of U_o and W_o
U_o_diff = X' * O_t_diff .* sigmoid_output_to_derivative(U_o);
W_o_diff = (H_t_1)' * O_t_diff .* sigmoid_output_to_derivative(W_o);
% differences of U_o and W_o
U_f_diff = X' * F_t_diff .* sigmoid_output_to_derivative(U_f);
W_f_diff = (H_t_1)' * F_t_diff .* sigmoid_output_to_derivative(W_f);
% differences of U_o and W_o
U_g_diff = X' * G_t_diff .* tan_h_output_to_derivative(U_g);
W_g_diff = (H_t_1)' * G_t_diff .* tan_h_output_to_derivative(W_g);
% update
U_i_update = U_i_update + U_i_diff;
W_i_update = W_i_update + W_i_diff;
U_o_update = U_o_update + U_o_diff;
W_o_update = W_o_update + W_o_diff;

```

```

U_f_update = U_f_update + U_f_diff;
W_f_update = W_f_update + W_f_diff;
U_g_update = U_g_update + U_g_diff;
W_g_update = W_g_update + W_g_diff;
out_para_update = out_para_update + out_para_diff;
end
U_i = U_i + U_i_update * alpha;
W_i = W_i + W_i_update * alpha;
U_o = U_o + U_o_update * alpha;
W_o = W_o + W_o_update * alpha;
U_f = U_f + U_f_update * alpha;
W_f = W_f + W_f_update * alpha;
U_g = U_g + U_g_update * alpha;
W_g = W_g + W_g_update * alpha;
out_para = out_para + out_para_update * alpha;
U_i_update = U_i_update * 0;
W_i_update = W_i_update * 0;
U_o_update = U_o_update * 0;
W_o_update = W_o_update * 0;
U_f_update = U_f_update * 0;
W_f_update = W_f_update * 0;
U_g_update = U_g_update * 0;
W_g_update = W_g_update * 0;
out_para_update = out_para_update * 0;
if(mod(j,1000) == 0)
err = sprintf('Error:%s\n', num2str(overallError)); fprintf(err);
d = bin2dec(num2str(d));
pred = sprintf('Pred:%s\n',dec2bin(d,8)); fprintf(pred);
Tru = sprintf('True:%s\n', num2str(c)); fprintf(Tru);
out = 0;
sep = sprintf('-----\n'); fprintf(sep);
end
end

```
